# Supplementary material for: The Chloroplast Envelope Protease FTSH11 – Interaction With CPN60 and Identification of Potential Substrates
Source: Front Plant Sci. 2019 Apr 5;10:428. doi: 10.3389/fpls.2019.00428 (PMC6459962; doi:10.3389/fpls.2019.00428)
Supplement: Supplementary file 2 [file Table_2.XLSX]

## Sheet: Proteomics raw data
Supplementary Table 2. Proteomics differential expression analysis: raw intensities and functional annotation.
intensity:KO_20_A	intensity: KO_20_C	intensity:KO_20_D	intensity: KO_30_A	intensity: KO_30_C	intensity: KO_30_D	intensity: WT_20_A	intensity: WT_20_B	intensity: WT_20_C	intensity: WT_30_A	intensity: WT_30_B	intensity: WT_30_C	Row	Accession	# proteins with shared peptides	# peptides	# unique peptides	Protein MW	Peptide ID score	Peptide sequences	Protein Description	Proteins with shared peptides	Peptide masses	Quan peptides	Uniprot Gene Name	Uniprot url	Protein Sequence Coverage
1320781952	1586091392	1394909568	1425334912	1290815872	1494838784	1436599936	1335318656	1376048384	1411377408	1594254976	1506822272	sp|P10896|RCA_ARATH	P10896	1	58	58	51980.642	"99.7,99.7,99.7,99.3,99.7,99.7,99.7,95.0,99.1,99.7,99.7,99.7,99.7,99.7,99.7,99.7,99.7,99.7,99.7,99.7,99.7,99.7,99.7,99.7,99.7,99.7,99.7,99.7,99.7,99.7,99.7,99.7,99.7,99.7,99.7,99.7,99.7,99.7,99.7,99.7,99.7,99.7,99.7,99.7,99.4,96.2,98.5,99.4,99.7,99.7,99.7,98.7,99.7,99.7,99.7,99.7,99.7,99.0"	"APLSLNGSGSGAVSAPASTFLGK,EGPPVFEQPEMTYEK,EGPPVFEQPEMTYEK | Deamidated [Q8],EGPPVFEQPEMTYEK | Deamidated [Q8] Oxidation [M11],EGPPVFEQPEMTYEK | Oxidation [M11],FVESLGVEK,GAQQVNLPVPEGCTDPVAENFDPTAR | Carbamidomethyl [C13],GAQQVNLPVPEGCTDPVAENFDPTAR | Carbamidomethyl [C13] Deamidated [N6],GAQQVNLPVPEGCTDPVAENFDPTAR | Carbamidomethyl [C13] Deamidated [Q3],GLAYDTSDDQQDITR,GLAYDTSDDQQDITR | Deamidated …	"sp|P10896|RCA_ARATH Ribulose bisphosphate carboxylase/oxygenase activase, chloroplastic OS=Arabidopsis thaliana GN=RCA PE=1 SV=2"	sp|P10896|RCA_ARATH	"2088.08289,1779.8020885,1780.78527,1796.778418,1795.7970685,1006.53381267,2781.30402267,2782.285275,2782.292718,1696.74950336,1697.735726,1697.733821,3323.5693485,3339.565976,3355.561001,3339.56286,2822.453001,1134.62815275,1926.88689775,1958.877044,1974.8730005,1958.885285,1942.8828215,1958.879023,1942.8835245,2082.988315,2098.985283,2114.978835,2130.975594,2114.980444,2098.986155,2114.980428,2…	"FVESLGVEK,GLAYDTSDDQQDITR,NFLTLPNIK"	RCA	http://www.uniprot.org/uniprot/P10896	65.189873
18129540	14975546	17577564	15089168	17582284	14484500	18573792	19454764	19365608	17087604	16365634	18208972	tr|F4KHD5|F4KHD5_ARATH	F4KHD5	1	58	58	323002.189	"99.7,95.9,99.7,99.7,99.7,96.3,99.1,99.7,99.7,98.9,99.5,99.7,99.7,99.1,99.7,99.7,99.4,99.4,99.5,99.7,99.7,99.7,99.7,99.7,98.9,99.7,99.7,99.7,99.3,99.7,99.7,99.7,99.7,99.7,99.7,97.9,99.5,99.7,99.0,99.7,99.7,99.5,99.7,99.7,99.7,99.7,99.7,99.7,99.7,99.7,99.6,99.7,99.6,97.1,99.7,99.7,99.3,99.7"	"AKEEDIAPK,ASLDHEEEMDK,ATETTIDQTLPIGTSQADQTPSLVSDK,ATETTIDQTLPIGTSQADQTPSLVSDKDDQTPK,DIGPSLTEICSINQNQPEEQVK | Carbamidomethyl [C10],DQSDEVSADETVPK,DTEEQEHVLVR,DVNMLDVQSGESEK,DVPVPQSETLVTEAK,DVQQCETIESEAVETK | Carbamidomethyl [C5],EAHDVEATSER,EDFEAAAIEK,EEGSYGLDTK,EETSSIEEK,EETVSVPESIELEEQPQEER,EEVPHNALENEEEMNEVVASEK,EEVTLHQEGR,EINQESFNNVK,EITNEVPSLENSK,ELEGETVVEAENIENIKENEEEQAAEK,ELGEQPQQEELCLANE…	tr|F4KHD5|F4KHD5_ARATH Uncharacterized protein OS=Arabidopsis thaliana GN=At5g40450 PE=1 SV=1	tr|F4KHD5|F4KHD5_ARATH	"999.521994,1302.539241,2816.393406,3500.702745,2498.1978665,1518.67641,1353.651282,1549.692597,1611.835379,1864.837888,1242.544365,1121.523328,1097.487582,1050.472196,2356.09408,2525.123103,1196.57964,1320.628358,1458.719596,3072.430671,2615.167248,1175.49073,1465.631796,1493.702468,1082.477246,2527.15809,1221.532706,1597.75802,987.486762,1243.701406,1065.618426,2623.287672,1399.766667,1799.8540…	"ENEEEQAAEK,IILSDVTLENK,EDFEAAAIEK"	At5g40450	http://www.uniprot.org/uniprot/F4KHD5	29.041191
1336712832	1151124608	1273858176	1155074176	1029941568	1323993216	1352642048	1384013824	1396534528	1678484352	1284832384	1426167808	sp|P19366|ATPB_ARATH	P19366	4	55	54	53933.193	"99.7,99.7,99.7,99.7,99.7,99.7,99.7,99.7,99.2,99.7,99.7,99.7,99.4,99.7,99.7,99.7,99.7,99.7,99.7,99.7,99.7,99.7,99.7,99.7,99.7,95.0,99.7,99.7,99.7,99.7,96.8,99.7,99.7,99.7,99.7,99.7,99.6,99.7,99.7,99.7,99.7,99.7,99.4,99.7,91.8,99.7,98.9,99.7,99.7,99.7,98.9,99.7,99.7,99.7,99.6"	"AHGGVSVFGGVGER,ATNLEMESK,ATNLEMESK | Oxidation [M6],AVAMSATEGLK,AVAMSATEGLK | Oxidation [M4],DTLGQEINVTCEVQQLLGNNR | Carbamidomethyl [C11],DVNEQDVLLFIDNIFR,EGNDLYMEMK,EGNDLYMEMK | Deamidated [N3],EGNDLYMEMK | Oxidation [M7 M9],EGNDLYMEMK | Oxidation [M7],EGNDLYMEMK | Oxidation [M9],ELQDIIAILGLDELSEEDR,ESGVINEQNLAESK,ESGVINEQNLAESK | Deamidated [N6],ESGVINEQNLAESK | Deamidated [N9],ESGVINEQNLAESK…	"sp|P19366|ATPB_ARATH ATP synthase subunit beta, chloroplastic OS=Arabidopsis thaliana GN=atpB PE=1 SV=2"	"sp|P83484|ATPBN_ARATH,sp|P19366|ATPB_ARATH,sp|Q9C5A9|ATPBO_ARATH,sp|P83483|ATPBM_ARATH"	"1327.66237408,1021.475312,1037.468292,1076.553858,1092.548439,2400.176785,1948.995445,1228.51012,1229.49396,1260.499944,1244.504908,1244.504701,2170.095966,1516.7371735,1517.719288,1517.720617,1517.717547,1432.76762033,1433.748894,2060.0258785,2076.0205455,2141.065342,2173.050041,2157.05699733,2157.055367,3713.871342,1734.0076555,1954.013701,974.555004,1629.8000955,1630.784844,1006.570276,1260.6…	"AVAMSATEGLK,VVDLLAPYR,SAPAFIELDTK"	atpB	http://www.uniprot.org/uniprot/P19366	78.714859
224282112	262602160	246948432	216588064	183732576	218813568	218184752	207441424	244325360	195651072	229755200	255388672	sp|Q9ZNZ7|GLTB1_ARATH	Q9ZNZ7	2	53	47	176749.635	"99.0,99.7,99.0,99.7,99.7,99.7,99.5,99.7,99.7,99.0,99.7,99.4,99.4,99.7,99.7,99.7,99.7,99.0,99.7,99.7,99.7,99.7,99.7,99.7,99.7,99.7,99.7,99.7,99.7,97.6,99.7,99.7,99.7,99.7,97.5,99.7,99.7,99.7,99.7,99.7,99.7,99.7,99.7,99.6,98.7,99.7,99.7,99.7,99.7,99.7,98.5,98.8,99.0"	"AFSEDTTK,ALYYLCEAADDAVR | Carbamidomethyl [C6],AVNAGLLK,DALIALGCMEHR | Carbamidomethyl [C8],EDSTDDIER,ENEIRPFGNPR,EQSLAPFDK,ETHEAIAIAMNR,ETHEAIAIAMNR | Oxidation [M10],ETLSFWVK,ETMPNIQQVFVK,ETMPNIQQVFVK | Oxidation [M3],EVPVNVPIVGK,FAQVTNPAIDPLR,FCTGGMSLGAISR | Carbamidomethyl [C2] Oxidation [M6],FLGHNGEINTIQGNLNWMQSR,FLGHNGEINTIQGNLNWMQSR | Oxidation [M18],FLKPVNFK,GATILNEWEK,GLQNGDIATSAIK,GLQN…	"sp|Q9ZNZ7|GLTB1_ARATH Ferredoxin-dependent glutamate synthase 1, chloroplastic/mitochondrial OS=Arabidopsis thaliana GN=GLU1 PE=1 SV=3"	"sp|Q9T0P4|GLTB2_ARATH,sp|Q9ZNZ7|GLTB1_ARATH"	"897.40761,1628.7505885,784.480656,1384.658589,1078.441338,1327.663302,1033.508228,1354.6661885,1370.6608865,1008.528356,1432.739349,1448.731184,1149.675982,1440.771632,1371.626478,2428.17167,2444.167071,991.58542325,1159.58658,1286.6844205,1287.667112,1385.722042,1401.717622,2294.153602,1648.77079,2470.2700725,1711.788622,1226.686584,1220.63962,1011.502828,2409.135203,2393.137791,1193.593008,144…	"VTAPAGELQLK,ISSFNPYGK,LIGESNDYVGK"	GLU1	http://www.uniprot.org/uniprot/Q9ZNZ7	36.621455
582690368	527523136	559965312	377786848	510409664	472465248	437282848	432702048	337672032	382018016	256621136	344960096	sp|P38418|LOX2_ARATH	P38418	1	47	47	102044.337	"99.7,99.7,99.7,99.7,99.7,99.0,92.8,99.7,99.0,98.6,99.7,99.0,99.7,99.7,99.7,99.6,99.7,99.7,98.6,99.7,99.7,99.7,99.7,99.7,99.7,99.7,99.7,99.7,99.7,99.7,99.7,99.4,99.7,99.7,99.7,99.7,99.7,98.8,99.6,99.7,99.7,99.7,99.7,99.7,99.7,99.0,99.0"	"AIQNLFEEGIQLPK,ALGEAQDDILQFDAPVLINR,ANIEQEGNTVK,AVLAALPSIFPQIESVLLSPQEPFPHFK,DAGLLPLLPR,DEEFSTAK,DEPWWPVLK,EELETLQGK,EEVGEFTK,EFYESPEK,ELNNTTLYASR,EWVTDYVK,FDQEGLPADLIK,GLAEEDKTAEHGVR,GLDDIADIR,GNMTVDEALK,GNMTVDEALK | Oxidation [M3],ITVEDYAQR,IYDYDVYNDVGDPDNDPELARPVIGGLTHPYPR,KDEPWWPVLK,KEELETLQGK,KPCETDPSSEQR | Carbamidomethyl [C3],LPGGSITFTCESWVAPK | Carbamidomethyl [C10],LQYLEGVIDER,MPTEDPTDE…	"sp|P38418|LOX2_ARATH Lipoxygenase 2, chloroplastic OS=Arabidopsis thaliana GN=LOX2 PE=1 SV=1"	sp|P38418|LOX2_ARATH	"1598.866966,2197.136908,1201.5944885,3074.684145,1063.639326,925.4027405,1168.591056,1045.529182,937.439418,1027.45005,1280.63506867,1038.502877,1344.691878,1510.73662167,986.503554,1076.517216,1092.511486,1093.540514,3744.781281,1296.6861735,1173.62352,1432.621681,1848.912536,1333.687213,1345.606508,1361.601964,2355.051238,2371.0424805,1207.5831245,1214.6232415,1230.61739,1225.676446,1961.96364…	"GLDDIADIR,YGGEFYVPR,ITVEDYAQR"	LOX2	http://www.uniprot.org/uniprot/P38418	51.785714
15043779	16073140	14343719	15067589	13982369	13643703	16008266	11145180	15357367	12707664	16438760	13096710	sp|P51818|HS903_ARATH	P51818	3	46	6	80051.113	"99.7,98.6,99.7,99.7,99.7,97.7,97.8,99.7,99.7,99.7,99.7,99.0,95.8,99.7,98.6,97.3,99.7,99.7,99.7,94.1,99.7,93.7,99.7,99.7,99.7,99.7,99.0,99.7,99.7,99.7,99.7,99.7,99.7,99.7,99.7,99.7,99.7,99.7,99.7,99.7,99.7,99.7,99.7,99.0,99.7,99.7"	"ADLVNNLGTIAR,ADLVNNLGTIAR | Deamidated [N5],APFDLFDTK,AVENSPFLEK,DEEGKVEEVDEEK,DSSMGGYMSSK,DSSMGGYMSSK | Oxidation [M4 M8],DSSMGGYMSSK | Oxidation [M4],DVLGDKVEK,EDQMEYIEER,EDQMEYIEER | Oxidation [M4],EEYAAFYK,EGLKLDETEDEK,EGQNDIFYITGESK,EISDDEEEEEK,EKFEGLCK | Carbamidomethyl [C7],ELISNSSDALDK,EVSHEWDLVNK,GIVDSEDLPLNISR,HFSVEGQLEFK,HNDDEQYVWESQAGGSFTVTR,IKEVSHEWDLVNK,IRFESLTDK,KAVENSPFLEK,KDEEGK…	sp|P51818|HS903_ARATH Heat shock protein 90-3 OS=Arabidopsis thaliana GN=HSP90-3 PE=1 SV=2	"sp|P27323|HS901_ARATH,sp|P55737|HS902_ARATH,sp|P51818|HS903_ARATH"	"1255.6877065,1256.671156,1052.5182695,1132.576354,1533.667968,1148.447878,1180.433166,1164.442828,1001.538918,1340.554972,1356.549342,1019.460612,1404.661488,1599.74320667,1350.529636,1009.490476,1290.629836,1354.651334,1526.7946085,1319.651412,2425.055229,1595.831232,1107.592812,1260.671014,1661.7627965,1857.91499533,977.417166,1733.936394,1167.5623875,3116.350158,1858.876362,1874.8723915,1208.…	"EDQMEYIEER,EDQMEYIEER | Oxidation [M4],DSSMGGYMSSK"	HSP90	http://www.uniprot.org/uniprot/P51818	50.9299
25494904	22469280	22311380	34115596	32690880	29860188	30024056	19956748	30251212	23900320	30418084	33369920	sp|F4JKH6|TSS_ARATH	F4JKH6	4	43	38	199113.182	"99.7,99.6,99.7,98.8,99.7,99.7,99.7,99.4,99.7,99.7,99.4,97.5,99.7,99.7,94.4,99.0,99.7,99.7,99.7,99.7,99.7,99.7,99.7,99.7,99.7,99.7,98.2,99.2,99.7,92.0,99.7,99.7,99.7,96.3,99.7,99.7,97.4,99.7,99.7,99.7,99.0,99.7,99.7"	"ALEQQEAAR,APQNLDAAK,DAGDSNSGLSPKPK,DLCDAELK | Carbamidomethyl [C3],DPAALGFHEER,DYEMDTSYPFK,EAPANDTDNTSETEDQK,ELVTETAYQR,ESETGFHLK,ESGSTDGDSPTEK,EVALAPPGTIVK,FGNLPYGFR,GKLEDAVNYGTK,GKPGQSPGPVSEENQK,HCGCTAIVK | Carbamidomethyl [C2 C4],IAVDGPEK,IVAEQLPEETK,IVENNQCSLK | Carbamidomethyl [C7],IVENNQCSLKDPAALGFHEER | Carbamidomethyl [C7],KSDGTQVLEISQEELAQR,KTEDPKPEPAVK,KVENFDLEQSKPQDQLK,LEDAVNYGTK,LLDI…	sp|F4JKH6|TSS_ARATH Protein TSS OS=Arabidopsis thaliana GN=TSS PE=1 SV=1	"sp|F4JKH6|TSS_ARATH,tr|F4HS99|F4HS99_ARATH,tr|F4HS98|F4HS98_ARATH,tr|F4HZK4|F4HZK4_ARATH"	"1014.509156,926.481634,1371.663604,962.43817,1240.583895,1394.570166,1863.756066,1208.603194,1046.503041,1308.527314,1193.701814,1069.534624,1293.655658,1637.7987005,1044.484034,827.43862,1255.665876,1203.591998,2426.163084,2030.025669,1337.717034,2045.042883,1108.539282,2128.135004,1648.797012,1664.793522,1051.602537,1673.855356,1170.596556,2615.335527,2631.32493,1681.728028,1901.933998,1206.49…	"EVALAPPGTIVK,ELVTETAYQR,IVAEQLPEETK"	TSS	http://www.uniprot.org/uniprot/F4JKH6	24.683892
10415957	11502345	10823168	13025806	10723407	16929724	9608122	15860498	10085156	20229980	10541636	10571657	sp|Q9LJL3|PREP1_ARATH	Q9LJL3	3	42	5	121013.264	"99.7,99.7,99.7,99.7,99.3,99.7,99.7,99.7,99.7,99.4,99.7,99.0,99.7,99.7,99.1,99.7,99.7,99.4,99.7,99.7,99.7,99.7,99.0,99.7,99.6,99.7,98.1,99.7,99.1,98.6,99.7,99.7,99.2,99.7,99.7,99.7,99.7,99.7,99.7,99.7,99.7,99.7"	"AAMTEEDLAELAR,AAMTEEDLAELAR | Oxidation [M3],AIIGTIGDVDSYQLPDAK,ATQEEVEEK,AVFSPLIEK,CVDDAHTFQQEGWHYELNDPSEDISYK | Carbamidomethyl [C1],CVPSLNLGDIPK | Carbamidomethyl [C1],DFAQAIDVVR,DIPNLTFEEFK,DSTGIPHILEHSVLCGSR | Carbamidomethyl [C15],EEILTTSLK,EPFVELLK,EPTYVPTEVGDINGVK,GLDVDQETLTK,GLSLMLQSISK,GSLHTFLNAFTYPDR,GVSEENVQK,GVYSQPDNILGR,HLLGVTDEER,IAQQALSPENTYGVDSGGDPK,IWFYGDDDPVHR,KVDEDWEGISSSLEEI…	"sp|Q9LJL3|PREP1_ARATH Presequence protease 1, chloroplastic/mitochondrial OS=Arabidopsis thaliana GN=PREP1 PE=1 SV=2"	"sp|Q8VY06|PREP2_ARATH,tr|F4JA10|F4JA10_ARATH,sp|Q9LJL3|PREP1_ARATH"	"1418.67078,1434.66524,1874.95884,1061.484508,1002.574722,3282.3822825,1311.685676,1132.58722,1351.66676,1976.971952,1032.570288,973.548566,1716.8573335,1217.613682,1175.657746,1737.844734,988.481268,1317.667638,1167.58773,2146.0179215,1518.689742,1990.946598,965.540642,1643.887952,1278.569126,1279.552838,1295.548528,1294.562826,1251.608778,1188.670604,1240.575106,1697.687108,1713.682422,1435.766…	"QETPDPPEALR,CVDDAHTFQQEGWHYELNDPSEDISYK | Carbamidomethyl [C1],VEELIMDTLK | Oxidation [M6]"	PREP1	http://www.uniprot.org/uniprot/Q9LJL3	39.166667
361113824	339844576	303158464	300158176	282808480	308919360	347250784	332826144	334105184	333915200	295336000	301141536	sp|Q94B78|GCSP1_ARATH	Q94B78	2	41	17	112924.006	"99.7,99.7,99.7,99.0,99.7,99.7,99.7,99.7,99.7,99.7,92.3,99.3,99.6,99.7,99.1,99.7,99.7,99.7,98.4,99.7,99.7,99.7,99.7,99.7,99.7,99.7,99.7,98.8,99.7,99.7,99.7,99.4,99.7,99.7,99.7,99.7,99.4,99.0,99.0,99.7,99.7"	"CSDAHAIADAASK | Carbamidomethyl [C1],DLSLCHSMIPLGSCTMK | Carbamidomethyl [C5 C14],DLSLCHSMIPLGSCTMK | Carbamidomethyl [C5 C14] Oxidation [M8 M16],EEIAQIEK,EYAAFPAPWLR,FCDALISIR | Carbamidomethyl [C2],FDAGLTESQMIQHMVDLASK | Oxidation [M10 M14],FGVPMGYGGPHAAFLATSQEYK,FGVPMGYGGPHAAFLATSQEYK | Oxidation [M5],GAPHPPSLLMADTWK,GAPHPPSLLMADTWK | Oxidation [M10],GNADVQNNVLK,GNADVQNNVLK | Deamidated [N7],…	"sp|Q94B78|GCSP1_ARATH Glycine dehydrogenase (decarboxylating) 1, mitochondrial OS=Arabidopsis thaliana GN=GLDP1 PE=1 SV=2"	"sp|Q94B78|GCSP1_ARATH,sp|O80988|GCSP2_ARATH"	"1315.582784,1948.88215467,1980.877341,958.497614,1319.66546,1093.55922,2252.04386933,2327.1059555,2343.09915025,1619.81266925,1635.807578,1170.598902,1171.582842,1042.5408,1170.635384,1639.86762767,1640.852787,1565.68612867,1581.681318,1220.658052,1236.653008,1074.59193,916.522502,2445.31715733,2775.2627455,1242.608798,2385.10738,2386.100784,2417.094936,2401.1003095,2401.097637,1721.78508,2083.0…	"IITVGTDAK,GNINIEEVR,EEIAQIEK"	GLDP1	http://www.uniprot.org/uniprot/Q94B78	37.222758
171047616	166717568	163804784	157780160	154251632	160309360	163967616	133767416	166976992	130630120	164124848	160517632	sp|Q9FI56|CLPC1_ARATH	Q9FI56	5	40	14	103451.308	"99.4,99.7,99.7,99.0,99.7,99.7,99.7,99.7,99.7,99.7,99.7,99.7,99.7,99.0,99.0,99.7,99.7,99.7,99.7,99.7,99.7,99.7,99.7,99.7,99.7,99.7,99.7,99.7,99.7,99.7,99.7,99.0,99.7,99.7,99.7,99.7,99.7,99.7,99.7,99.0"	"AEVSAIQAK,AIDLIDEAGSR,ALAAYYFGSEEAMIR,EGEGVAAR,HAQVPEEAR,HIEKDPALER,IASGDVPETIEGK,IASGDVPETIEGKK,IGFDLDYDEK,IIGQDEAVK,KVITLDMGLLVAGTK,KVITLDMGLLVAGTK | Oxidation [M7],LAEEGKLDPVVGR,LDEMIVFR,LDEMIVFR | Oxidation [M4],LDMSEFMER,LDMSEFMER | Oxidation [M3 M7],LDMSEFMER | Oxidation [M3],LDMSEFMER | Oxidation [M7],LIGSPPGYVGYTEGGQLTEAVR,LLEDSMAEK,MPTLEEYGTNLTK,MPTLEEYGTNLTK | Oxidation [M1],MVGENNEVTA…	"sp|Q9FI56|CLPC1_ARATH Chaperone protein ClpC1, chloroplastic OS=Arabidopsis thaliana GN=CLPC1 PE=1 SV=1"	"sp|P42762|CLPD_ARATH,tr|F4JF64|F4JF64_ARATH,sp|P42730|CLPB1_ARATH,sp|Q9FI56|CLPC1_ARATH,sp|Q9SXJ7|CLPC2_ARATH"	"915.502462,1158.587268,1690.803412,787.380732,1035.508373,1206.635917,1314.66712333,1442.762196,1213.5507995,971.528626,1557.91614,1573.91097,1381.75377,1021.526818,1037.52195,1156.489397,1188.47923,1172.483928,1172.484124,2263.1491805,1034.4960205,1495.722534,1511.71671,1949.8723638,1965.869392,1353.67112,1958.037333,1804.9610505,1820.954926,1368.693654,1607.8556325,917.506696,1028.561752,1158.…	"IIGQDEAVK,VPEPTVDETIQILK,AEVSAIQAK"	CLPC1	http://www.uniprot.org/uniprot/Q9FI56	37.459634
4212126208	4289591808	4651713024	4279023360	4922867712	4346266624	4353016832	5041347072	4468079616	4454595584	4181984000	4839763456	sp|O03042|RBL_ARATH	O03042	1	39	39	52954.424	"99.6,99.0,99.0,99.7,98.3,99.7,99.7,99.7,99.7,99.0,99.7,99.7,99.7,99.7,99.7,99.7,99.7,99.7,99.7,99.7,99.7,99.7,99.7,99.7,99.7,99.7,99.7,99.7,99.7,99.7,99.7,99.7,99.7,99.7,99.7,99.7,99.7,99.7,99.7"	"ALAALRLEDLR,AMHAVIDR,AMHAVIDR | Oxidation [M2],DDENVNSQPFMR,DDENVNSQPFMR | Deamidated [N4],DDENVNSQPFMR | Deamidated [N6],DDENVNSQPFMR | Deamidated [N6] Oxidation [M11],DDENVNSQPFMR | Deamidated [Q8],DDENVNSQPFMR | Oxidation [M11],DDYVEKDR,DLAVEGNEIIR,DLAVEGNEIIR | Deamidated [N7],DNGLLLHIHR,DNGLLLHIHR | Deamidated [N2],DTDILAAFR,EITFNFPTIDK,EITFNFPTIDKLDGQE,ELGVPIVMHDYLTGGFTANTSLSHYCR | Carbami…	sp|O03042|RBL_ARATH Ribulose bisphosphate carboxylase large chain OS=Arabidopsis thaliana GN=rbcL PE=1 SV=1	sp|O03042|RBL_ARATH	"1239.730683,911.46497,927.45924975,1450.61093145,1451.598004,1451.596614,1467.594028,1451.597818,1466.60790655,1038.461286,1227.64351824,1228.628656,1186.6595165,1187.641006,1020.52404733,1323.670978,1865.904915,3037.43781825,3053.43788025,1248.66867975,1260.621941,2168.978553,2184.973452,1793.80479165,1794.79068612,1810.781935,1809.7973058,1949.90961267,1950.892527,1965.90463633,1446.75482891,1…	"DLAVEGNEIIR,SQAETGEIK,EITFNFPTIDK"	rbcL	http://www.uniprot.org/uniprot/O03042	58.246347
51635680	49580040	57396100	64471724	48052460	57308132	58625248	47979588	58846484	47323344	56518232	56813644	sp|P20649|PMA1_ARATH	P20649	5	39	11	104222.55	"99.7,99.7,99.7,99.7,99.7,99.7,99.7,97.0,99.7,99.7,99.5,99.7,99.7,99.7,99.7,99.7,99.0,99.7,99.7,99.0,99.7,98.9,99.7,99.7,99.7,99.6,99.0,99.7,99.7,99.3,99.7,99.0,99.7,99.0,93.0,99.7,99.7,99.7,99.7"	"AAHLVDSTNQVGHFQK,ADGFAGVFPEHK,ADIGIAVADATDAAR,ALNLGVNVK,AWASLFDNR,EAQWAQAQR,EDVNIFPEK,EGLTTQEGEDR,ELSEIAEQAK,EVHFLPFNPVDK,EVHFLPFNPVDKR,GAPEQILDLANARPDLR,HIVGMTGDGVNDAPALK,HIVGMTGDGVNDAPALK | Oxidation [M5],HPGQEVFSGSTCK | Carbamidomethyl [C12],IPIEEVFQQLK,IVIFGPNK,IVIFGPNKLEEK,KADIGIAVADATDAAR,KDYGIGER,KHIVGMTGDGVNDAPALK,KHIVGMTGDGVNDAPALK | Oxidation [M6],LGDIIPADAR,LGMGTNMYPSAALLGTDK | Oxidat…	"sp|P20649|PMA1_ARATH ATPase 1, plasma membrane-type OS=Arabidopsis thaliana GN=AHA1 PE=1 SV=3"	"sp|P20431|PMA3_ARATH,sp|Q9LV11|PMA11_ARATH,tr|F4JPJ7|F4JPJ7_ARATH,sp|P20649|PMA1_ARATH,sp|P19456|PMA2_ARATH"	"1750.87530433,1273.609521,1428.72022967,926.555064,1078.51979,1086.520381,1089.534382,1233.546842,1116.566008,1440.741048,1596.841016,1847.98549333,1693.8462825,1709.84017,1432.6401885,1342.750012,886.527816,1385.791164,1556.8156845,936.466782,1821.940938,1837.935261,1039.566246,1870.877754,1854.885882,1854.885142,883.501544,2409.299121,944.52875,1145.611204,1931.799334,1007.51144,1647.764228,84…	"GAPEQILDLANARPDLR,TALTYIDSDGNWHR,EDVNIFPEK"	AHA1	http://www.uniprot.org/uniprot/P20649	36.775553
21260432	25476032	23624096	22491360	17791492	23210172	24020688	18199540	25135456	21625784	21599364	22174680	sp|Q0WNJ6|CLAH1_ARATH	Q0WNJ6	2	38	9	193242.953	"99.7,99.2,99.7,99.7,98.3,99.7,99.7,99.7,92.6,99.7,99.7,99.7,99.7,99.7,99.7,99.7,99.1,99.7,99.7,99.7,99.7,99.7,99.7,99.7,99.7,95.3,99.7,98.6,99.7,99.5,99.5,99.7,99.7,98.1,99.7,99.7,99.7,99.0"	"ADDTTQFLEVIR,AGLYIQSLK,AQVPGTTQDHLQIFNIEAK,ASEDTNVYDDLVR,DLLLVNLR,EAAELAAESPQGILR,ESIDLHDSFDQIGLAQK,ESNFYDAEK,ETAPQNSVVIIDMNMPMQPLR | Deamidated [N6] Oxidation [M15 M17],EVCFACVDAEEFR | Carbamidomethyl [C3 C6],FQELFAQTK,FQSVPVQAGQTPPLLQYFGTLLTR,GNLPGAENLVVQR,GNMQLFSVDQQR,GNMQLFSVDQQR | Oxidation [M3],GQCDEELINVTNK | Carbamidomethyl [C3],HYSELPDIK,IIIDSNNNPEHFLTTNPYYDSK,LECSEELGDLVK | Carbamidome…	sp|Q0WNJ6|CLAH1_ARATH Clathrin heavy chain 1 OS=Arabidopsis thaliana GN=CHC1 PE=1 SV=1	"sp|Q0WNJ6|CLAH1_ARATH,sp|Q0WLB5|CLAH2_ARATH"	"1406.704512,991.570196,2109.083553,1495.678666,954.586236,1553.8037985,1914.9324865,1101.462171,2416.166772,1630.676026,1110.570594,2660.433096,1365.7362845,1421.670566,1437.666728,1518.697884,1100.550042,2594.231329,1390.66583,1821.014177,1309.651774,1302.668172,1284.623318,1626.8819065,1259.6981095,1674.803148,1641.825792,1051.532582,1486.703058,1502.6963,1582.811832,1014.534512,1475.77303,987…	"VEEDAVWSQVAK,VLTEENEYR,ASEDTNVYDDLVR"	CHC1	http://www.uniprot.org/uniprot/Q0WNJ6	26.334311
30029432	34401508	36938060	38643328	31909920	39297908	31438016	30303256	34246352	34040752	29216880	34411380	sp|F4JVN6|TPPII_ARATH	F4JVN6	1	37	37	152366.134	"99.7,99.7,99.7,97.3,96.5,98.7,99.7,99.7,99.7,99.7,99.7,99.0,99.7,99.7,99.7,99.7,99.7,99.7,99.7,99.7,99.7,98.9,99.7,99.7,99.7,99.5,95.3,99.7,99.7,99.7,99.7,99.2,99.7,99.7,99.7,99.0,99.7"	"ADCFIEAHPEYDGR | Carbamidomethyl [C3],ALENTSTPVGDLPEDK,AVNNLYDFDQK,DKFEENFK,DQLADALYQK,EAFYLGPPTK,FHEGASNLK,FVDLVTEAVNK,GASGATLVVNSSWK,GPVIDAVVWHDGEVWR,HENVELLEK,ILEGLLSR,IPVTIIIPK,ISHHEEIIEAANEVVR,LADFSPLTNYR,LEDSAEVKPYIPLLNNR,LGSMETGTGLTR,LGSMETGTGLTR | Oxidation [M4],LNLHSEPDGPFTGNGAFK,LTTGQGLMQVDK,LTTGQGLMQVDK | Oxidation [M8],LVPIAVLNK,NTPQGSMLVGEISYGK | Oxidation [M7],QFQDYPCVFYQIK | Carba…	sp|F4JVN6|TPPII_ARATH Tripeptidyl-peptidase 2 OS=Arabidopsis thaliana GN=TPP2 PE=1 SV=1	sp|F4JVN6|TPPII_ARATH	"1678.704724,1684.815054,1325.623672,1055.491974,1163.583802,1121.576322,1001.492301,1233.659552,1375.711032,1833.916272,1109.571536,899.543832,992.663428,1844.937612,1295.650806,1970.0483655,1221.602062,1237.59699,1899.909774,1289.6646,1305.659626,965.627112,1695.813496,1734.807058,1430.70389,1395.691954,1161.464728,1702.791151,1158.613798,1842.934252,2093.023068,1373.730524,1270.691078,1444.653…	"VPYQPIDAQLK,IPVTIIIPK,FVDLVTEAVNK"	TPP2	http://www.uniprot.org/uniprot/F4JVN6	30.869565
309094880	336542016	325642464	347057984	338777600	351014144	359946816	295277600	328579008	289508960	328596960	387660800	tr|Q9ASR1|Q9ASR1_ARATH	Q9ASR1	1	37	37	93890.141	"99.7,99.7,99.7,99.7,99.7,99.7,99.7,99.7,99.7,99.0,99.0,99.0,99.7,99.7,99.7,99.6,99.7,99.7,99.7,99.7,99.7,99.7,99.7,99.7,99.7,99.7,99.7,99.7,99.7,99.7,99.7,99.0,99.7,99.7,99.7,99.7,99.7"	"DKLWPMLAK,DKLWPMLAK | Oxidation [M6],DLQDDFMGGAEIIK,DLQDDFMGGAEIIK | Oxidation [M7],DSVVAGFQWASK,EAMTPLSEFEDK,EAMTPLSEFEDK | Oxidation [M3],EGPLAEENMR,EGPLAEENMR | Oxidation [M9],EVDAHPIR,FSVSPVVR,FTADELRR,GFVQFCYEPIK | Carbamidomethyl [C6],GGGQVIPTAR,GHVFEEMQRPGTPLYNIK,GVQYLNEIK,ILAEEFGWDK,IMGPNYIPGEK,IMGPNYIPGEK | Oxidation [M2],IRPVLTVNK,IWAFGPETTGPNMVVDMCK | Carbamidomethyl [C18] Oxidation […	tr|Q9ASR1|Q9ASR1_ARATH At1g56070/T6H22_13 OS=Arabidopsis thaliana GN=T6H22.13 PE=1 SV=1	tr|Q9ASR1|Q9ASR1_ARATH	"1100.6055195,1116.600465,1550.728836,1566.723872,1293.634586,1395.620584,1411.61724,1144.518188,1160.512564,935.4815595,889.501834,1006.519185,1386.663884,954.524512,2115.05738,1062.570994,1206.59247,1217.610942,1233.605984,1038.655311,2183.9707415,2167.976572,2167.974867,1451.684366,1606.749159,1607.731374,1622.742762,1306.6453355,1322.639643,1320.616308,1336.610394,905.460744,1835.848667,1851.…	"GVQYLNEIK,SDPVVSFR,FSVSPVVR"	T6H22	http://www.uniprot.org/uniprot/Q9ASR1	33.570581
143391648	122880864	139050256	157941712	126274840	147660640	159426640	116048000	145410976	129530016	165971280	143688624	sp|P22953|MD37E_ARATH	P22953	6	36	14	71356.917	"99.7,99.7,99.7,99.7,99.7,99.7,99.7,99.7,99.7,99.7,99.7,99.7,99.0,97.1,99.1,99.7,99.7,99.7,98.5,97.9,99.7,99.7,99.7,99.7,99.7,99.7,99.7,98.0,99.7,92.9,99.7,99.7,99.7,99.7,99.1,99.7"	"ARFEELNMDLFR | Oxidation [M8],ATAGDTHLGGEDFDNR,DAGVIAGLNVMR,EFAAEEISSMVLIK | Oxidation [M10],ELESICNPIIAK | Carbamidomethyl [C6],FEELNMDLFR | Oxidation [M6],FSDSSVQSDMK,FSDSSVQSDMK | Oxidation [M10],IINEPTAAAIAYGLDK,IINEPTAAAIAYGLDKK,IQAGPADKPMIYVEYK,IQAGPADKPMIYVEYK | Oxidation [M10],LSKDEIEK,MKELESICNPIIAK | Carbamidomethyl [C8],MKELESICNPIIAK | Carbamidomethyl [C8] Oxidation [M1],MVNHFVQEFK,M…	sp|P22953|MD37E_ARATH Probable mediator of RNA polymerase II transcription subunit 37e OS=Arabidopsis thaliana GN=MED37E PE=1 SV=3	"sp|Q9LHA8|MD37C_ARATH,sp|P22954|MD37D_ARATH,sp|P22953|MD37E_ARATH,sp|Q39043|MD37F_ARATH,sp|Q9LKR3|MD37A_ARATH,sp|O65719|HSP7C_ARATH"	"1555.744869,1674.722934,1214.643232,1581.795954,1385.721451,1328.60653,1229.523016,1245.517443,1658.8868795,1786.982324,1821.9350465,1837.92814667,960.511784,1644.848238,1660.852096,1277.6224025,1293.617687,2732.1449665,2749.14107,2749.139806,2764.1367935,2748.140863,2748.141691,1357.60778,1373.603561,1679.82593,1646.80869,1648.78036,1662.802578,2559.254862,1425.757429,1001.5502565,1472.677992,1…	"FSDSSVQSDMK,STVHDVVLVGGSTR,IQAGPADKPMIYVEYK | Oxidation [M10]"	MED37E	http://www.uniprot.org/uniprot/P22953	46.697389
206517072	155987040	171061568	208773584	166542736	201589040	171110176	142421040	169201904	196261664	171967936	195653184	tr|Q9SZD6|Q9SZD6_ARATH	Q9SZD6	1	36	36	103780.854	"99.7,99.7,99.5,99.7,99.7,99.7,99.7,99.7,99.7,98.9,99.7,99.7,99.7,93.7,93.6,95.6,99.7,99.7,99.7,99.7,99.7,99.7,99.7,99.7,99.7,99.7,99.7,99.7,99.7,99.7,99.7,99.7,99.7,99.7,99.6,99.5"	"ALAATGGDLEK,ATGTDVVAAVEEQDSTPVVAEDK,ATGTDVVAAVEEQDSTPVVAEDK | Deamidated [Q13],ATGTDVVAAVEEQDSTPVVAEDKETVASEK,DVSSVVTIGQEVK,EAVASPPTTVVSAALVK,EDLLSKPENIR,EDLLSKPEQIR,EETGAGMMDCK | Carbamidomethyl [C10],EETGAGMMDCK | Carbamidomethyl [C10] Oxidation [M7 M8],EETGAGMMDCK | Carbamidomethyl [C10] Oxidation [M7],EETGAGMMDCK | Carbamidomethyl [C10] Oxidation [M8],EQVVAETPVDEVK,GISPALVK,GQMLDGVVK,GQMLDGV…	tr|Q9SZD6|Q9SZD6_ARATH Elongation factor Ts OS=Arabidopsis thaliana GN=F19B15.90 PE=2 SV=1	tr|Q9SZD6|Q9SZD6_ARATH	"1044.545154,2330.110833,2331.084219,3074.478699,1359.7242765,1638.918566,1312.699068,1326.7144335,1227.456209,1259.443298,1243.451306,1243.44934,1441.729404,783.48519,945.495252,961.489802,957.549294,1030.5202925,1046.5143795,1276.667012,1859.973744,1859.9882415,1002.52316,1278.575922,1294.57039,1148.571618,1361.682028,1172.640206,1657.94056,2016.088434,1115.517724,3414.575247,1731.878673,2375.1…	"IATIGENIK,QTVATLGENIK,GISPALVK"	F19B15	http://www.uniprot.org/uniprot/Q9SZD6	36.621196
22665424	22816176	24920528	30154128	25802528	28751660	26215648	21404140	24474080	24118176	26414388	31083180	sp|O81283|TC159_ARATH	O81283	1	34	34	160816.704	"99.7,97.6,99.5,99.6,99.3,97.8,99.4,99.7,99.7,99.7,98.7,99.7,99.7,99.7,99.7,99.2,99.7,99.7,99.7,99.7,92.5,99.7,99.0,99.7,99.7,99.7,99.7,99.7,99.7,99.7,99.7,99.7,98.6,99.7"	"AATGGGSSEGGNFTITSQDGTK,ASSGIEAHSDEANISNNMSDR,AYFEEYDYR,EDVEDIKDDGESK,EISGTVNGVK,EKPNLVGDGK,EVDQEPSGEGVTR,FDPIGQGEGGEVELESDK,FPATATVQVTK,FTSESDSIADSSK,GMTYAEVIK,HGENGSTMAGFDIQNVGK,HGENGSTMAGFDIQNVGK | Oxidation [M8],IENGSVDVDVK,INADAETLEVANK,ITFIDTPGLK,KDDEGESELGGK,LESVDTSAVEPEVVAAESGSEPK,LGHSAEDSIAAQVLYR,LVLVGSTGTMR,LVLVGSTGTMR | Oxidation [M10],QAGQLFSLDAAK,QFLAELEK,SAAMDQSTNAK,SIRPEATNDK,TITAS…	"sp|O81283|TC159_ARATH Translocase of chloroplast 159, chloroplastic OS=Arabidopsis thaliana GN=TOC159 PE=1 SV=1"	sp|O81283|TC159_ARATH	"2041.92105,2203.939293,1254.519644,1477.64164,1002.535318,1055.560708,1401.637128,1904.86441,1161.63942,1372.59883,1010.511146,1860.84121,1876.837881,1173.58751,1386.69832,1103.622508,1262.564757,2329.1157365,1728.879164,1132.627106,1148.622094,1247.650224,976.522996,1122.495268,1129.570728,1276.702658,1449.743103,2351.158095,2234.0323445,1612.855614,1346.656098,1704.803384,2103.107782,2515.1929…	"INADAETLEVANK,QAGQLFSLDAAK,AYFEEYDYR"	TOC159	http://www.uniprot.org/uniprot/O81283	28.809049
124224592	108320536	128433424	143685968	122226528	143084528	108691120	104311280	120696632	128709336	126525568	131374624	sp|Q9LTX9|HSP7G_ARATH	Q9LTX9	2	34	13	76995.578	"99.7,99.0,99.7,99.7,99.3,99.7,99.7,99.0,93.7,99.0,99.7,99.7,99.7,99.7,99.0,99.7,99.7,99.0,99.7,99.7,99.7,99.0,99.7,99.7,99.7,99.7,93.7,99.0,99.7,99.7,99.7,99.7,99.7,99.7"	"AVITVPAYFNDSQR,DEGIDLLK,DEVDTMVQEAER,DEVDTMVQEAER | Oxidation [M6],DIDEVILVGGSTR,FEELCSDLLDR | Carbamidomethyl [C5],GKFEELCSDLLDR | Carbamidomethyl [C7],GVPQIEVK,HIETTLTR,IAGLEVLR,IASGSTQEIK,IINEPTAASLAYGFER,IPAVQDLVR,KDEGIDLLK,KLVDDASR,KQDITITGASTLPK,KQDITITGASTLPKDEVDTMVQEAER,LDCPAIGK | Carbamidomethyl [C3],MNEVAEESK,MNEVAEESK | Oxidation [M1],NQADSVVYQTEK,NTTLPTSK,QAVVNPENTFFSVK,QDITITGASTLPK…	"sp|Q9LTX9|HSP7G_ARATH Heat shock 70 kDa protein 7, chloroplastic OS=Arabidopsis thaliana GN=HSP70-7 PE=2 SV=1"	"sp|Q9LTX9|HSP7G_ARATH,sp|Q9STW6|HSP7F_ARATH"	"1579.79944,901.475682,1420.613318,1436.60949,1372.71577,1395.633268,1580.751399,868.501688,969.52405,869.534106,1032.54605,1750.888932,1009.592134,1029.571118,902.480835,1471.824549,2874.42646,872.4428295,1035.454014,1051.447006,1380.651248,860.459932,1578.8039115,1343.72968,1460.762605,2436.175236,2437.178592,914.482254,1065.570822,1114.595355,1115.579592,1164.6182,3055.5660115,3071.5557465"	"IPAVQDLVR,IINEPTAASLAYGFER,VVDWLASTFK"	HSP70	http://www.uniprot.org/uniprot/Q9LTX9	41.504178
823444224	802915712	714685952	659992640	661776256	704695680	741961280	719847296	718854144	758390400	745697472	717174144	sp|Q9LD57|PGKH1_ARATH	Q9LD57	4	33	16	50111.154	"99.7,99.7,99.7,99.7,99.7,99.7,99.7,99.7,99.0,99.0,99.7,99.7,99.7,99.7,99.7,99.7,99.7,99.7,99.7,99.7,99.7,99.7,99.7,99.7,99.7,99.7,99.7,99.7,99.7,99.7,99.7,99.0,99.0"	"ADDCIGPEVESLVASLPEGGVLLLENVR | Carbamidomethyl [C4],ADLNVPLDDNQTITDDTR,AHASTEGVTK,AQGLSVGSSLVEEDK,AQGLSVGSSLVEEDKLELATELLAK,EEEKNDPEFAK,ELDYLVGAVSNPK,FAAGTEAIANK,FAPDANSK,FAPDANSK | Deamidated [N6],FLKPSVAGFLLQK,FLKPSVAGFLLQK | Deamidated [Q12],FSLAPLVPR,FYKEEEKNDPEFAK,GVSLLLPTDVVVADK,GVTTIIGGGDSVAAVEK,IGVIESLLEK,IVPASGIEDGWMGLDIGPDSIK,IVPASGIEDGWMGLDIGPDSIK | Oxidation [M12],KLASLADLYVNDAFGTAHR…	"sp|Q9LD57|PGKH1_ARATH Phosphoglycerate kinase 1, chloroplastic OS=Arabidopsis thaliana GN=PGK1 PE=1 SV=1"	"tr|F4I3L1|F4I3L1_ARATH,tr|Q9SAJ4|Q9SAJ4_ARATH,sp|Q9LD57|PGKH1_ARATH,sp|P50318|PGKH2_ARATH"	"2950.5027135,2014.947307,999.495542,1517.757136,2599.39296,1334.59803,1403.7296755,1091.561532,848.403152,849.385724,1446.860711,1447.844916,998.592246,1772.824905,1524.877226,1572.83160267,1099.649475,2269.128588,2285.140248,2061.064892,1232.660841,1932.9697045,1933.95252,1099.648799,1200.6971455,1101.6295725,1104.567794,2268.18812,2284.17036,1219.74012614,1604.9406715,906.480856,907.464818"	"SVGDLTSADLK,YLIENGAK,FAAGTEAIANK"	PGK1	http://www.uniprot.org/uniprot/Q9LD57	67.567568
3863147	5.33696e+06	4455714	5.83491e+06	4935604	4.39434e+06	6080347	5139391	4.86089e+06	5625407	7e+06	4.0233e+06	sp|Q9S7C0|HSP7O_ARATH	Q9S7C0	3	33	4	91749.016	"97.1,99.7,99.7,99.7,95.1,99.7,98.8,99.6,99.6,99.7,99.7,99.6,99.7,99.7,99.7,99.7,99.7,99.1,99.0,99.0,99.0,99.7,99.7,99.7,99.7,99.7,99.7,99.7,99.4,99.7,99.0,99.7,99.7"	"AFTPTQVMGMMLSNLK | Oxidation [M10 M11],AVLDAATIAGLHPLR,DFDEVLFNHFAAK,DTSDATGTDNGVPESAEKPVQMETDSK,DTSDATGTDNGVPESAEKPVQMETDSK | Deamidated [N10],EAAMSTDPK,EFEMALQDR,EFEMALQDR | Oxidation [M4],ETPAIVCFGDK | Carbamidomethyl [C7],FDHIELAEK,FIGTAGAASTMMNPK,FIGTAGAASTMMNPK | Oxidation [M11 M12],FIGTAGAASTMMNPK | Oxidation [M11],FIGTAGAASTMMNPK | Oxidation [M12],GAASEAQNGGAENQQSTIVFPK,GCALQCAILSPTFK | …	sp|Q9S7C0|HSP7O_ARATH Heat shock 70 kDa protein 14 OS=Arabidopsis thaliana GN=HSP70-14 PE=2 SV=1	"tr|F4HQD5|F4HQD5_ARATH,sp|F4HQD4|HSP7P_ARATH,sp|Q9S7C0|HSP7O_ARATH"	"1799.862938,1516.872356,1551.73647,2808.227295,2809.211403,948.421918,1137.512456,1153.508322,1235.585252,1100.550615,1495.717772,1527.70627,1511.711004,1511.71148,2203.052946,1564.773352,1329.65222,1743.83332,873.456788,957.503109,953.522023,1427.728672,1630.930029,1763.945445,1745.8116595,1345.59625,1118.535492,1084.551488,1153.485066,1169.478302,869.460148,1247.675558,1302.572652"	"AVLDAATIAGLHPLR,LIHETTATALAYGIYK,EAAMSTDPK"	HSP70	http://www.uniprot.org/uniprot/Q9S7C0	39.470517
157992320	126127112	151068864	189789664	180765632	177645568	150682208	136912048	154688512	186630752	173753088	176173152	sp|P21240|CPNB1_ARATH	P21240	4	32	9	63808.375	"99.7,98.5,99.7,99.7,99.7,99.7,99.7,99.7,99.7,99.7,99.7,99.7,99.7,99.7,99.7,99.7,99.7,99.7,99.7,99.7,99.7,99.7,99.7,98.4,99.7,99.7,99.7,99.7,99.0,99.7,99.7,99.7"	"AAVEEGIVVGGGCTLLR | Carbamidomethyl [C13],ALVTELKK,ATLDNDEEK,CCLEHAASVAK | Carbamidomethyl [C1 C2],DLVGVLEDAIR,EEVGLSLDK,EPEPVPVGNPMDNSGYGY,ETSTIVGDGSTQDAVK,ETSTIVGDGSTQDAVKK,EVEDSELADVAAVSAGNNDEIGNMIAEAMSK | Oxidation [M24 M29],EVELEDPVENIGAK,FGYNAATGK,GGYPILIIAEDIEQEALATLVVNK,GVVTLEEGK,GYISPYFVTDSEK,IVNDGVTVAR,KGVVTLEEGK,LADLVGVTLGPK,LRVEDALNATK,LSGGVAVIQVGAQTETELK,MSVEFDNCK | Carbamidomethyl …	"sp|P21240|CPNB1_ARATH Chaperonin 60 subunit beta 1, chloroplastic OS=Arabidopsis thaliana GN=CPN60B1 PE=1 SV=3"	"sp|P21240|CPNB1_ARATH,sp|C0Z361|CPNB3_ARATH,sp|Q9C667|CPNB4_ARATH,sp|Q9LJE4|CPNB2_ARATH"	"1699.8913905,900.564242,1033.454644,1244.563656,1198.656682,988.507026,1920.821489,1606.768354,1734.859968,3210.4187685,1540.761444,927.445094,2568.40446,930.502314,1504.708044,1042.577102,1058.596812,1181.7017845,1228.67753,1899.02877557,1128.457382,1144.452726,1159.583228,1160.566162,1478.687994,1870.8527465,1886.846687,959.491726,887.471216,1279.7614465,1535.75402,1551.747206"	"ETSTIVGDGSTQDAVK,MSVEFDNCK | Carbamidomethyl [C8],VLSNDNVK"	CPN60B1	http://www.uniprot.org/uniprot/P21240	56.166667
484673952	543609024	542649920	564059904	464667744	608959360	538100160	532151520	602826048	609117376	521305408	588433984	sp|Q9LRR9|GLO1_ARATH	Q9LRR9	3	32	14	40340.991	"99.7,99.7,99.7,94.9,99.7,99.0,91.5,99.7,99.7,99.7,99.7,99.7,99.7,99.7,99.6,99.6,99.7,99.7,99.7,99.7,99.7,99.7,99.7,99.7,99.7,99.7,99.7,99.7,99.7,91.9,99.0,99.7"	"AASAAGTIMTLSSWATSSVEEVASTGPGIR,AASAAGTIMTLSSWATSSVEEVASTGPGIR | Oxidation [M9],AIALTVDTPR,DEFELTMALSGCR | Carbamidomethyl [C12],DEFELTMALSGCR | Carbamidomethyl [C12] Oxidation [M7],FFQLYVYK,FTLPPNLTLK,GVLTGEDAR,IAIQAGAAGIIVSNHGAR,IDMTTTVLGFK,IDMTTTVLGFK | Oxidation [M3],IPVFLDGGVR,ISMPIMVAPTAMQK,ISMPIMVAPTAMQK | Oxidation [M12],ISMPIMVAPTAMQK | Oxidation [M3 M12],ISMPIMVAPTAMQK | Oxidation [M3 M…	sp|Q9LRR9|GLO1_ARATH Peroxisomal (S)-2-hydroxy-acid oxidase GLO1 OS=Arabidopsis thaliana GN=GLO1 PE=1 SV=1	"sp|Q9LRS0|GLO2_ARATH,sp|Q9LRR9|GLO1_ARATH,tr|F4JFV6|F4JFV6_ARATH"	"2907.42556,2923.419996,1055.598278,1527.669046,1543.663638,1106.580176,1142.671235,916.46159,1717.95916433,1224.642565,1240.635784,1071.60838,1516.780367,1532.776084,1548.769704,1564.76740533,1548.772039,1532.777098,1548.771828,1532.777626,1317.57728667,1333.57130967,2010.889583,2026.8888575,1596.771258,2438.049599,2454.047362,991.497785,1779.8648015,1780.849875,955.545476,1874.006484"	"IPVFLDGGVR,NVVEQLVR,IDMTTTVLGFK"	GLO1	http://www.uniprot.org/uniprot/Q9LRR9	67.302452
36127608	40103204	44800780	31052200	25672560	37475880	37222240	36714560	40927728	43821168	28940328	31872384	sp|Q9XIE2|AB36G_ARATH	Q9XIE2	1	32	32	165080.12	"99.0,99.7,99.7,99.7,99.7,98.1,99.7,99.7,99.7,99.0,99.7,98.6,99.7,99.7,99.7,99.2,99.2,99.3,99.1,99.7,99.7,99.0,98.1,99.6,99.7,99.0,99.7,99.7,99.7,99.7,99.7,99.1"	"ADCYTGNR | Carbamidomethyl [C3],AGLLPEEENEDADQGK,AGLLPEEENEDADQGKDPMR,AGLLPEEENEDADQGKDPMR | Oxidation [M19],DISGVIKPGR,DQGVTETR,DSIVGLPGVTGLSTEQR,GGQVIYAGPLGQNSHK,GTADFLQEVTSK,ILGLDICK | Carbamidomethyl [C7],ISGYCEQTDIHSPQVTVR | Carbamidomethyl [C5],KGTADFLQEVTSK,LGTMVLNTWDVYHQK,LSVDFAELYNQSALHQR,MSNELAVPFDK,MSNELAVPFDK | Oxidation [M1],MTLLLGPPSSGK,MTLLLGPPSSGK | Oxidation [M1],NIEDIFSSGSR,NMG…	sp|Q9XIE2|AB36G_ARATH ABC transporter G family member 36 OS=Arabidopsis thaliana GN=ABCG36 PE=1 SV=1	sp|Q9XIE2|AB36G_ARATH	"955.37995,1713.76877,2212.99081267,2228.986725,1040.5980045,904.423128,1727.905283,1624.826978,1294.639576,930.52113,2088.990861,1422.733935,1803.897216,1989.989574,1249.600792,1265.593472,1199.655718,1215.652164,1223.577458,1697.811942,1152.602032,1110.676544,919.435788,1347.6151,1976.004575,999.633026,1075.570214,2243.04675333,1231.647678,1247.643978,1486.733896,1243.536409"	"VVEYFESFPGVSK,GTADFLQEVTSK,MTLLLGPPSSGK"	ABCG36	http://www.uniprot.org/uniprot/Q9XIE2	22.736555
4.22856e+06	6.39389e+06	6049837	6116339	5978406	5.53234e+06	5.59755e+06	6062559	5843466	5774557	5.75923e+06	5669919	sp|Q39043|MD37F_ARATH	Q39043	5	31	2	73560.352	"99.7,99.7,99.7,99.7,99.7,96.0,99.7,99.7,99.7,99.7,99.7,99.7,99.7,99.7,99.7,99.7,99.7,99.7,99.7,99.0,99.6,99.7,99.7,99.7,99.7,99.7,99.7,99.7,99.0,99.7,99.7"	"ALSSQHQVR,AMDDAGLQK,AMDDAGLQK | Oxidation [M2],DAGVIAGLNVAR,DAVVTVPAYFNDAQR,DFFEGKEPNK,DGKPYIQVK,EAEEFAEEDK,EAEEFAEEDKK,EALEWLDENQNSEK,EALEWLDENQNSEKEEYDEK,ETAEAYLGK,EVEAVCNPIITAVYQR | Carbamidomethyl [C6],FDLTGVPPAPR,FEELNNDLFR,GVNPDEAVAYGAAVQGGILSGEGGDETK,ITPSWVGFTDSER,LADKLEGDEK,LKEVEAVCNPIITAVYQR | Carbamidomethyl [C8],LSQEEIDR,LVPYQIVNK,MKETAEAYLGK,MKETAEAYLGK | Oxidation [M1],NALETYVYNMK,N…	sp|Q39043|MD37F_ARATH Mediator of RNA polymerase II transcription subunit 37f OS=Arabidopsis thaliana GN=MED37F PE=1 SV=2	"sp|Q39043|MD37F_ARATH,sp|Q9LDZ0|HSP7J_ARATH,sp|Q8GUM2|HSP7I_ARATH,sp|Q9LKR3|MD37A_ARATH,sp|Q8H1B3|MD37B_ARATH"	"1024.539486,947.438238,963.432148,1154.641165,1664.81509,1209.56643,1046.576143,1195.48763,1323.5827215,1703.762052,2497.076178,980.4807835,1860.9398235,1168.62376,1295.614096,2660.259778,1493.713918,1116.5666405,2102.121174,988.482486,1072.627554,1239.617225,1255.611568,1344.639333,1360.632636,1535.744256,1536.728502,997.492734,899.543678,2245.873474,1472.782372"	"FDLTGVPPAPR,SGGAPGAGGESSTEEEDESHDEL"	MED37F	http://www.uniprot.org/uniprot/Q39043	43.712575
67637248	77651632	75533544	92169136	80729832	78618144	65747632	38634040	68472080	53163792	74631488	77806920	sp|Q9SIF2|HS905_ARATH	Q9SIF2	4	31	28	88661.865	"99.7,99.7,99.3,99.7,99.7,99.7,99.7,99.7,99.7,99.5,99.2,93.2,99.7,98.9,99.7,99.7,99.7,99.7,99.5,99.7,99.7,99.7,99.7,99.7,99.7,99.7,98.7,99.7,97.7,99.7,99.7"	"AIYYLATDSLK,AQALGDTSSLEFMR,AQALGDTSSLEFMR | Deamidated [Q2] Oxidation [M13],AQALGDTSSLEFMR | Oxidation [M13],EDDKYEFAESTR,EDLELGDEDEVKDR,EELIDCLGTIAQSGTSK | Carbamidomethyl [C6],EETDPDNILR,ELVSNASDALDK,EVEKGEYNEFYK,FEYQAEVSR,FGWSANMER,FVDISKEDLELGDEDEVK,GEYNEFYK,GVVDSDDLPLNVSR,IKPDPDNGTITITDTGIGMTK,IKPDPDNGTITITDTGIGMTK | Oxidation [M19],ILEINPDHPIIK,IYEMMAMAVGGR | Oxidation [M4 M5 M7],IYEMMAMAV…	"sp|Q9SIF2|HS905_ARATH Heat shock protein 90-5, chloroplastic OS=Arabidopsis thaliana GN=HSP90-5 PE=1 SV=1"	"sp|F4JFN3|HS906_ARATH,sp|Q9STX5|ENPL_ARATH,sp|Q9SIF2|HS905_ARATH,tr|F4JQ55|F4JQ55_ARATH"	"1256.664982,1524.722898,1541.699842,1540.720776,1488.636441,1660.741239,1820.88313133,1200.561864,1260.619418,1533.697766,1127.524664,1096.47581,2078.988705,1048.450192,1484.746326,2187.1101725,2203.0881,1400.801738,1375.594082,1359.598164,1242.5657705,1232.643102,1074.491868,2386.009995,1416.672552,2187.090433,1685.754844,2220.971046,2349.068278,2141.983822,1794.727616"	"GVVDSDDLPLNVSR,ILEINPDHPIIK,ELVSNASDALDK"	HSP90	http://www.uniprot.org/uniprot/Q9SIF2	41.666667
286153152	357638208	310192000	305335936	277189920	307693760	349765152	311252512	318928640	351621248	314753952	311306304	sp|Q9SZJ5|GLYM1_ARATH	Q9SZJ5	2	31	19	57399.998	"99.7,94.0,99.7,99.7,99.7,99.0,99.7,99.7,99.0,99.7,97.6,99.7,99.7,99.7,99.7,99.7,99.7,99.7,99.7,92.9,99.7,99.7,99.0,99.7,99.7,97.1,99.0,99.7,99.7,99.7,99.7"	"AYQEQVLSNSAK,AYQEQVLSNSAK | Deamidated [Q5],DFVSAMESSSTIQSEIAK,DFVSAMESSSTIQSEIAK | Oxidation [M6],EVLYDFEDK,FAQTLMER | Oxidation [M6],GFVEEDFAK,GYELVSGGTDNHLVLVNLKPK,HEVEEFAK,IMALDLPHGGHLSHGYQTDTK,IMALDLPHGGHLSHGYQTDTK | Oxidation [M2],INQAVFPGLQGGPHNHTITGLAVALK,LDESTGYIDYDQMEK,LDESTGYIDYDQMEK | Oxidation [M13],LIVAGASAYAR,LKDFVSAMESSSTIQSEIAK,LKDFVSAMESSSTIQSEIAK | Oxidation [M8],LRHEVEEFAK,MG…	"sp|Q9SZJ5|GLYM1_ARATH Serine hydroxymethyltransferase 1, mitochondrial OS=Arabidopsis thaliana GN=SHM1 PE=1 SV=1"	"sp|Q94C74|GLYM2_ARATH,sp|Q9SZJ5|GLYM1_ARATH"	"1336.661898,1337.63905,1928.903123,1944.896985,1156.528392,1010.485122,1040.481941,2252.218016,987.465862,2290.1167936,2306.110794,2652.45118867,1805.766282,1821.761452,1090.614188,2170.0837415,2186.0771375,1256.651083,932.475416,948.470316,1568.798283,1584.792332,926.432174,1065.550314,2401.198161,2403.160143,918.528166,1179.6609465,998.445702,2053.876051,2069.86961233"	"VLEAVHIASNK,GFVEEDFAK,EVLYDFEDK"	SHM1	http://www.uniprot.org/uniprot/Q9SZJ5	52.224371
110871976	227067376	167759136	168047120	138569824	160282336	175129248	101125240	191942944	98570584	175551200	157030736	sp|Q9STX5|ENPL_ARATH	Q9STX5	3	30	0	94202.822	"99.7,98.8,98.8,99.2,99.7,99.7,99.7,96.1,99.7,98.1,99.7,99.6,99.7,99.7,99.7,99.7,99.7,99.7,99.7,99.7,99.7,99.7,99.7,99.7,99.7,99.7,99.7,99.7,99.7,99.7"	"APHDLYESYYNSNK,DEAGEYLEESK,DIFYITGSSK,EEDAEEEDGEK,EEDAEEEDGEKK,ELISNASDALDK,EMLQQHSSLK,EMLQQHSSLK | Oxidation [M2],ETVYEWELLNDVK,EVTEEEYTK,FAVSEDTWNEPLGR,FLALTDKDVLGEGDTAK,GLVDSDTLPLNVSR,GNLASENVDDVK,HNDDSQYVWESK,IASDPEDESVK,IGGHGGLSTDSDVVHR,IMQSQTLSDANK,IMQSQTLSDANK | Oxidation [M2],KLAEEDPDEIHDDEK,LADTPCVVVTSK | Carbamidomethyl [C6],LAEEDPDEIHDDEK,LAEEDPDEIHDDEKK,LGIIEDAANR,LMDIIINSLYSNK | Oxi…	sp|Q9STX5|ENPL_ARATH Endoplasmin homolog OS=Arabidopsis thaliana GN=HSP90-7 PE=1 SV=1	"sp|F4JFN3|HS906_ARATH,sp|Q9STX5|ENPL_ARATH,tr|F4JQ55|F4JQ55_ARATH"	"1699.747392,1268.537974,1129.5658345,1278.4689,1406.5647435,1274.634954,1199.596359,1215.590888,1636.79862,1126.503086,1619.75771,1791.925008,1484.7835325,1259.59876,1506.6373995,1188.550692,1605.78540867,1334.649604,1350.644362,1781.7954,1288.669734,1653.7001,1781.795958,1070.572206,1538.8012305,1079.586918,2485.14809433,2842.30218733,3131.420406,924.45517"	"LGIIEDAANR,ELISNASDALDK,GLVDSDTLPLNVSR"	HSP90	http://www.uniprot.org/uniprot/Q9STX5	39.368165
21890904	20314936	21844172	27184708	28028784	25052076	21061844	18295240	28763688	19592320	28379576	29411860	tr|F4HS98|F4HS98_ARATH	F4HS98	2	30	0	197497.443	"99.7,99.7,99.7,99.6,99.7,99.7,99.7,99.7,97.6,99.7,98.9,99.7,99.0,99.7,99.7,95.1,99.7,99.7,99.7,99.7,99.7,99.7,99.6,97.0,99.7,99.7,99.7,99.0,99.7,99.7"	"AFDNAYSDLLK,DEQMITGLEEEVKK,DFDMDSPAPFR,DFDMDSPAPFR | Oxidation [M4],DTVVDEAGETSHSFPK,EDHLLSIDVK,EISADPESNITQGEEEIK,EQQVIDQLAADSEDLK,EVALAPPGSIAK,GLTADENTAAHDVATLGTISLK,IDGIQATGLDK,IICHNLVDLLR | Carbamidomethyl [C3],LEGEEIDR,LLDIVACTTCFGPSPEK | Carbamidomethyl [C7 C10],LSISTTDSGDASR,MLEESIAK,MPISLLNRPYDSQPFK,NGTPKPDASIASK,NLLSDAAFTR,QSDTSPPPSPASK,QSNVSEHLVEIPR,TDASSVEPPTLSSTVQSEAYHTK,TEQGTSMELTR,…	tr|F4HS98|F4HS98_ARATH Tetratricopeptide repeat-containing protein OS=Arabidopsis thaliana GN=At1g01320 PE=1 SV=1	"tr|F4HS99|F4HS99_ARATH,tr|F4HS98|F4HS98_ARATH"	"1255.607414,1647.802635,1296.544234,1312.538416,1717.7744715,1167.613032,1987.924502,1800.874756,1151.654754,2197.117815,1129.597838,1364.759889,959.45577,1906.917344,1308.61581,919.466438,1904.9827905,1284.667506,1106.571334,1297.613578,1506.779246,2434.150254,1251.57596,1267.571074,1512.67923,2906.362233,939.57507,895.54897,2288.326302,1397.61235"	"AFDNAYSDLLK,EVALAPPGSIAK,NLLSDAAFTR"	At1g01320	http://www.uniprot.org/uniprot/F4HS98	21.712367
19570864	22166656	20607088	20722312	21853960	20788380	18642988	17516576	20297852	21095048	19100776	23952452	tr|F4JZY1|F4JZY1_ARATH	F4JZY1	1	30	30	181975.48	"99.7,99.7,97.4,99.0,99.7,99.7,94.2,99.7,98.7,99.2,99.7,99.7,99.3,99.7,99.7,99.7,99.2,99.4,98.8,99.4,99.0,99.7,94.5,99.7,98.2,99.7,99.7,99.7,99.7,99.7"	"AESTIQELSSESER,ALVEQEAAYNTLEEEHK,ASELEAQLESSK,DIHEIHQR,EAQNTIQELVSESGQLK,EFYSEYQSLYR,ELEEQVESSK,ELNQNLNSSEEEK,ERDELQTER,ESELSSLVK,ETLMGLGEEK,GLEAQLESSEHR,IAELSNEIK,ILDISNEIQEAQK,ILGMVESGDVNEDESNR | Oxidation [M4],ILSQQISEMSIK,ILSQQISEMSIK | Oxidation [M9],ISETSDELER,LDDEVNGLR,LEQAQNTIK,LTTTVEEK,LVAELNQTLNNAEEEK,QVVADLVK,QYDDLTGEIR,SADQQVADMK,SELSNQITDVQK,SETEAELER,TQIMVQELTADSSK,TTSDQLKDETSNLK,V…	tr|F4JZY1|F4JZY1_ARATH COP1-interactive protein 1 OS=Arabidopsis thaliana GN=CIP1 PE=4 SV=1	tr|F4JZY1|F4JZY1_ARATH	"1564.720279,1972.936962,1290.619204,1046.524263,1872.943294,1483.660758,1176.549816,1532.695902,1174.555992,990.523286,1105.531662,1354.648544,1015.554888,1499.783644,1878.826227,1375.73677,1391.732856,1177.546362,1029.50986,1043.560802,919.486078,1813.905756,870.517564,1208.566188,1091.490492,1360.681654,1062.483008,1549.766808,1578.774248,1723.757264"	"LDDEVNGLR,QVVADLVK,IAELSNEIK"	CIP1	http://www.uniprot.org/uniprot/F4JZY1	21.311475
575960960	322696576	472984640	536859424	470711872	498152192	474733888	409226784	496224512	493925568	358116416	538574208	sp|O50008|METE1_ARATH	O50008	2	29	14	84355.616	"99.7,99.7,98.6,99.7,99.7,99.0,99.7,99.7,99.3,99.7,99.6,99.3,99.3,99.7,99.7,99.7,99.7,99.7,95.1,99.7,99.7,99.0,99.7,99.0,99.7,99.7,99.7,99.7,99.7"	"ALAGQKDEALFSANAAALASR,ALGVDTVPVLVGPVSYLLLSK,AMTVFWSAMAQSMTSRPMK | Oxidation [M2 M13 M18],CVKPPVIYGDVSRPK | Carbamidomethyl [C1],DEALFSANAAALASR,DEVEDLEK,FIPSNTFAHYDQVLDTTAMLGAVPPR,GGIGVIQIDEAALR,GMLTGPVTILNWSFVR | Oxidation [M2],GNASVPAMEMTK,GNASVPAMEMTK | Oxidation [M10],GNASVPAMEMTK | Oxidation [M8 M10],GNASVPAMEMTK | Oxidation [M8],HETCYQIALAIK | Carbamidomethyl [C4],IPSSEEIADR,KVSEEDYVK,KYTE…	sp|O50008|METE1_ARATH 5-methyltetrahydropteroyltriglutamate--homocysteine methyltransferase 1 OS=Arabidopsis thaliana GN=MS1 PE=1 SV=1	"sp|Q9SRV5|METE2_ARATH,sp|O50008|METE1_ARATH"	"2074.0801975,2139.2582735,2207.980683,1713.924193,1505.74774233,975.439725,2860.423425,1410.78324467,1805.944996,1234.567938,1250.563194,1266.557538,1250.56415,1445.733948,1115.545706,1095.54462,1175.692412,2309.3029825,2299.226976,2417.263812,1145.67053,890.43349,1020.539436,967.449662,2303.1621756,941.554788,1657.82234,1095.571368,1047.5965075"	"VVEVNALAK,IPSSEEIADR,VSEEDYVK"	MS1	http://www.uniprot.org/uniprot/O50008	44.444444
15204389	19985112	19641264	19054288	19460540	22734576	17768456	21125928	16107399	22418744	13466729	19168416	sp|Q39102|FTSH1_ARATH	Q39102	2	29	12	76758.403	"99.7,99.7,99.7,99.7,99.7,99.7,99.7,99.7,99.5,99.5,99.7,99.7,98.5,99.7,97.7,99.5,99.0,99.7,99.0,99.7,99.7,99.7,99.7,99.7,99.7,99.7,99.7,99.7,98.9"	"AQGGPGGGPGGLGGPMDFGR,AQGGPGGGPGGLGGPMDFGR | Deamidated [Q2] Oxidation [M16],AQGGPGGGPGGLGGPMDFGR | Oxidation [M16],ATEIITTHIDILHK,DEISDALER,DYSMATADIVDAEVR | Oxidation [M4],EISKDEISDALER,FQEVPETGVSFADVAGADQAK,GAGMGGGNDER,GCLLVGPPGTGK | Carbamidomethyl [C2],GQAGGLTFFAPSEER,IGQVAVGGPGGNPFMGQQMSSQK,IGQVAVGGPGGNPFMGQQMSSQK | Deamidated [N12] Oxidation [M15 M19],IGQVAVGGPGGNPFMGQQMSSQK | Oxidation [M…	"sp|Q39102|FTSH1_ARATH ATP-dependent zinc metalloprotease FTSH 1, chloroplastic OS=Arabidopsis thaliana GN=FTSH1 PE=1 SV=2"	"sp|Q39102|FTSH1_ARATH,sp|Q9FH02|FTSH5_ARATH"	"1740.785198,1757.79003,1756.7979036,1603.8930845,1046.48816,1670.745771,1503.74097,2165.0270365,1019.406112,1154.611506,1565.747081,2274.087228,2307.078507,2306.0791105,2290.086426,2290.0843,926.5804575,1331.734678,923.470934,2550.29465933,2566.288833,1176.61389,1311.689347,1260.573582,1507.744854,1523.739418,2273.1539695,2730.246742,1069.545922"	"SSDLPEGSQWR,AQGGPGGGPGGLGGPMDFGR,FQEVPETGVSFADVAGADQAK"	FTSH1	http://www.uniprot.org/uniprot/Q39102	41.759777
749126528	841116160	895734208	778511552	701967936	754823552	834311168	683278528	803057856	713595648	753462144	788476224	sp|Q8RWV0|TKTC1_ARATH	Q8RWV0	3	29	0	79967.317	"99.7,99.7,99.7,98.9,99.7,99.2,99.7,99.7,99.7,99.7,99.7,99.7,99.7,99.7,99.7,99.7,99.7,99.7,96.1,99.7,99.7,99.7,99.7,99.7,99.7,99.7,99.7,99.7,99.7"	"AAAVETVEPTTDSSIVDK,ALPTYTPESPGDATR,AMPNTLMFRPADGNETAGAYK,AMPNTLMFRPADGNETAGAYK | Oxidation [M2 M7],AMPNTLMFRPADGNETAGAYK | Oxidation [M2],AMPNTLMFRPADGNETAGAYK | Oxidation [M7],ANSYSVHGAALGEK,EFGITVEAVVDAAK,ESVLPSDVSAR,FLAIDAVEK,GGYTISDDSSGNKPDVILIGTGSELEIAAQAAEVLR | Deamidated [N12],HTPEGATLESDWSAK,KTPSILALSR,KYPEEASELK,LPHLPGTSIEGVEK,NGNTGYDEIR,NGNTGYDEIR | Deamidated [N1],NLSQQCLNALAK | Carba…	"sp|Q8RWV0|TKTC1_ARATH Transketolase-1, chloroplastic OS=Arabidopsis thaliana GN=TKL-1 PE=1 SV=1"	"sp|Q8RWV0|TKTC1_ARATH,sp|F4IW47|TKTC2_ARATH,tr|F4JBY2|F4JBY2_ARATH"	"1831.905466,1574.75698075,2254.049928,2286.03693,2270.044737,2270.045565,1402.6836735,1447.75385,1158.588518,1004.555671,3646.785465,1627.7484192,1084.660016,1192.59758,1475.79761,1137.504245,1138.488968,1358.6979315,2016.957048,1731.95255833,1399.735366,3484.805514,956.565866,1114.6601945,1351.67874,1236.635389,2076.093795,2092.086616,1064.50273"	"ALPTYTPESPGDATR,SIITGELPAGWEK,FLAIDAVEK"	TKL	http://www.uniprot.org/uniprot/Q8RWV0	44.804318
34340320	27784680	32641088	34673180	41076644	39065980	29845332	32711436	30097984	28384768	22510512	25856012	sp|Q9FNB0|CHLH_ARATH	Q9FNB0	1	29	29	153572.014	"99.7,99.6,99.7,99.7,96.8,99.0,99.7,99.7,99.7,99.7,99.7,98.9,99.6,99.0,99.7,99.7,98.6,99.7,98.9,99.7,99.7,99.7,99.7,99.7,99.6,99.6,98.8,99.7,99.7"	"DATVVGLVLQR,DVDLPDEGLELSPK,EAQFSSPNLNVAYK,ELYSQVEDK,GAVSAFVEK,GILSDVELLK,GPQIVSSIISTAK,GYWDTSAENIEK,HALEQAEALGIDIR,KPSSYIADTTTANAQVR,LGSFSMSQLGQSK,LGSFSMSQLGQSK | Oxidation [M6],MISGSYVPALK,MISGSYVPALK | Oxidation [M1],MLQTFLEANGR,MVAELDEPVEQNFVR,MVAELDEPVEQNFVR | Oxidation [M1],QGSAGFADSMLK,QGSAGFADSMLK | Oxidation [M10],QLQDMYLSR | Oxidation [M5],QLSELISSYQSLK,SFAFDSDAPGAGMAEK,SYANTISYLTPPAENA…	"sp|Q9FNB0|CHLH_ARATH Magnesium-chelatase subunit ChlH, chloroplastic OS=Arabidopsis thaliana GN=CHLH PE=1 SV=1"	sp|Q9FNB0|CHLH_ARATH	"1169.676022,1525.751036,1566.76823,1109.523956,906.480712,1085.633266,1299.739288,1411.625514,1534.811211,1821.92294,1368.670616,1384.671556,1164.620898,1180.616336,1278.638506,1774.854438,1790.85208,1210.565542,1226.559606,1168.554356,1494.793033,1599.685208,2172.07616,1479.804391,1682.668502,1666.676126,953.485642,1255.619492,1594.810983"	"GAVSAFVEK,LGSFSMSQLGQSK | Oxidation [M6],VEPVSLEELGRPR"	CHLH	http://www.uniprot.org/uniprot/Q9FNB0	21.21651
362518944	392475808	388689248	380143648	310664800	364082176	421383648	386585056	393911424	499220480	305468928	408585312	sp|Q9LR30|GGT1_ARATH	Q9LR30	2	29	20	53300.625	"99.7,99.7,99.7,99.0,99.0,99.7,99.7,99.7,99.7,99.7,99.7,99.7,99.0,99.7,99.7,98.5,99.7,99.7,99.7,99.7,99.7,99.7,99.7,99.7,99.7,99.7,98.9,99.7,99.7"	"ALDYDTLNENVK,AMVIINPGNPTGQCLSEANIR | Carbamidomethyl [C14],AMVIINPGNPTGQCLSEANIR | Carbamidomethyl [C14] Oxidation [M2],EVAEFIQR,EVAEFIQR | Deamidated [Q7],EVQLVSFHTVSK,FNDEFMTQYDNNFGYSK,FNDEFMTQYDNNFGYSK | Deamidated [N11],FNDEFMTQYDNNFGYSK | Deamidated [N11] Oxidation [M6],FNDEFMTQYDNNFGYSK | Oxidation [M6],GGYFEMTNLPPR,GVMQILNCVIR | Carbamidomethyl [C8] Oxidation [M3],GYWGECGQR | Carbamidomet…	sp|Q9LR30|GGT1_ARATH Glutamate--glyoxylate aminotransferase 1 OS=Arabidopsis thaliana GN=GGAT1 PE=1 SV=1	"sp|Q9S7E9|GGT2_ARATH,sp|Q9LR30|GGT1_ARATH"	"1393.671184,2254.120417,2270.1144945,990.513192,991.497074,1372.7350965,2118.863113,2119.848342,2135.843685,2134.8584795,1380.648684,1317.689181,1111.450216,1782.85413033,2319.285196,1118.61184,1760.9306205,1171.500216,1187.494184,968.56571,2853.452463,2147.9795825,2097.948715,2081.955452,1224.587932,1256.579624,1240.583304,1240.582876,1139.568854"	"LPTGALQAAK,ALDYDTLNENVK,EVAEFIQR"	GGAT1	http://www.uniprot.org/uniprot/Q9LR30	53.846154
17678764	20103100	20563944	18435172	16460217	20868592	19291868	17572536	18837296	18093564	16744007	19692344	sp|F4IXW2|BIG5_ARATH	F4IXW2	1	28	28	192880.349	"99.6,98.7,99.7,99.0,99.0,99.0,99.7,99.7,99.7,99.7,99.7,93.1,99.7,99.7,99.2,99.7,98.9,99.7,96.5,99.0,99.7,99.7,99.7,99.7,99.7,99.7,99.7,98.6"	"AIQAYQDGSK,DVDDVNLQR,EEESPALGAIR,FMDNLFLR,FTFLHAPK,GALANLFK,GSSLQCLVNVLK | Carbamidomethyl [C6],HEDPTEPDSR,IAMYAIDSLR,IAQGSQSADPNPAMASQTASVK,IFDAALDCLHK | Carbamidomethyl [C8],LIAYDHLEGDPGLDGGK,LSSQRPGGEER,LVCCEQMEIR | Carbamidomethyl [C3 C4],LVSFCEQVLK | Carbamidomethyl [C5],NANEDSASTGEPIETK,NPASVAQFLR,SLDNSECPNDQK | Carbamidomethyl [C7],SREDVPSNFEK,SSVAEVTVPSSPYK,STMEAAISEFNR,TGVEADEPQK,TTSGLA…	sp|F4IXW2|BIG5_ARATH Brefeldin A-inhibited guanine nucleotide-exchange protein 5 OS=Arabidopsis thaliana GN=BIG5 PE=1 SV=2	sp|F4IXW2|BIG5_ARATH	"1079.52433,1072.512478,1170.58671,1054.528426,959.523108,832.480622,1316.714124,1181.491394,1151.599984,2158.033084,1301.644521,1768.8506,1214.597328,1336.593394,1221.643718,1661.737902,1101.59219,1405.577876,1306.614426,1449.733856,1354.617888,1072.503294,2365.051311,1188.698022,957.58702,1432.71491,2130.04354125,1183.531706"	"GALANLFK,NPASVAQFLR,EEESPALGAIR"	BIG5	http://www.uniprot.org/uniprot/F4IXW2	19.666475
174854080	195963456	176143952	190117264	169528592	172737088	181962368	170557216	176474496	161824624	165598816	189901808	sp|O23654|VATA_ARATH	O23654	1	28	28	68811.672	"99.0,99.7,98.1,99.3,99.7,99.7,97.7,99.7,99.0,99.7,99.7,99.7,99.7,99.7,99.7,99.7,99.7,99.7,99.7,99.7,99.7,99.7,99.7,99.6,99.7,99.7,99.7,99.7"	"DALAEGDK,DALAEGDKITLETAK,DMGYNVSMMADSTSR,DMGYNVSMMADSTSR | Oxidation [M2 M8],DMGYNVSMMADSTSR | Oxidation [M2],DMGYNVSMMADSTSR | Oxidation [M8 M9],DMGYNVSMMADSTSR | Oxidation [M8],EDYLAQNAFTPYDK,ESEYGYVR,FDPDFINIR,FEDPAEGEDTLVEK,ISGDVYIPR,ITYIAPAGQYSLK,LAADTPLLTGQR,LAEMPADSGYPAYLAAR,LAEMPADSGYPAYLAAR | Oxidation [M4],LTTFEDDEK,LYDDLNAGFR,NIIHFYNLANQAVER,SYTMLQSWPVR,SYTMLQSWPVR | Oxidation [M4],TT…	sp|O23654|VATA_ARATH V-type proton ATPase catalytic subunit A OS=Arabidopsis thaliana GN=VHA-A PE=1 SV=1	sp|O23654|VATA_ARATH	"817.38028,1573.819829,1663.662806,1695.654158,1679.657658,1695.653892,1679.658964,1673.756862,1001.44531,1135.566328,1577.709848,1018.54526,1423.769932,1254.693063,1794.859398,1810.8560075,1096.4925465,1182.567698,1800.9275115,1366.669178,1382.664689,1544.7977305,1560.792982,945.549818,1334.7310135,2123.037474,1674.730444,1336.6192625"	"LAADTPLLTGQR,ISGDVYIPR,LYDDLNAGFR"	VHA	http://www.uniprot.org/uniprot/O23654	40.770465
55897432	55810496	56974492	61425876	45012984	53955032	69215728	60895824	67068440	57601648	66332112	67128304	sp|Q5GM68|CAPP2_ARATH	Q5GM68	2	28	16	109752.141	"99.7,98.0,94.0,99.5,99.0,99.7,99.5,99.7,99.7,99.7,99.7,99.6,97.9,99.7,99.7,99.7,99.7,99.7,99.7,99.2,99.7,99.7,99.7,99.7,99.7,99.7,99.7,99.7"	"AGMSYFHETIWK,AGMSYFHETIWK | Oxidation [M3],DPYITTLNVCQAYTLK | Carbamidomethyl [C10],DYMESSPAAELVK,ECGITDPLR | Carbamidomethyl [C2],GDPGIAALYDR,GGGPTHLAILSQPPDTIHGQLR,IRDCLTQLYAK | Carbamidomethyl [C4],KGDFADEASATTESDIEETLKR,KPSGGIESLR,LADLESAPAAVAR,LATPELEYGR,LIEYDALLLDR,LLLQVAGHK,LSAAWQLYK,NQTVDLVLTAHPTQSVR,QELDEALQR,QEVMIGYSDSGK,QEVMIGYSDSGK | Oxidation [M4],QIPANEPYR,QVSTFGLALVK,RPLFGPDLPK,RQ…	sp|Q5GM68|CAPP2_ARATH Phosphoenolpyruvate carboxylase 2 OS=Arabidopsis thaliana GN=PPC2 PE=1 SV=2	"sp|Q9MAH0|CAPP1_ARATH,sp|Q5GM68|CAPP2_ARATH"	"1468.6802485,1484.674342,1898.944374,1438.661988,1059.502232,1146.566928,2264.202128,1379.722958,2412.127653,1042.576758,1282.6883645,1147.587756,1332.723214,977.602248,1078.581456,1877.9952565,1100.546164,1312.596002,1328.588778,1086.54619,1161.67564,1138.6497295,1444.767173,1781.87604,1365.6658315,1147.575964,1170.533312,1186.52816"	"GDPGIAALYDR,ECGITDPLR | Carbamidomethyl [C2],LADLESAPAAVAR"	PPC2	http://www.uniprot.org/uniprot/Q5GM68	31.775701
31293212	35911644	38251312	36819568	31654232	40672428	33772800	31262652	35371548	34874148	34923232	37168504	sp|Q94A41|AMY3_ARATH	Q94A41	1	28	28	99840.812	"99.7,99.7,97.7,98.3,99.6,99.7,98.0,99.7,99.7,99.7,99.7,99.7,99.7,99.7,99.7,99.7,99.4,99.7,99.7,99.7,99.7,99.7,99.7,99.7,98.3,99.7,99.7,99.7"	"AVTFIENHDTGSTQGHWR,DEETGAWYQHK,DLYNLNSR,DVYAAIIDEK,DYAIETPLK,DYAIETPLKK,EKNWELSVGCSIPGK | Carbamidomethyl [C10],EVQENILQEIEK,GFGALGQLSNIPLKQDK,GILHTALQK,GKPPGVVGWWPSR,GLQEFYEEMPISK,KDDGNGSFGLFSLDGK,KGFGALGQLSNIPLK,KWEIPSEPYPEETSLFK,LAAEAYSIFR,LEGLCFVLK | Carbamidomethyl [C5],LNENTWLNYR,NLAIDISSHK,NQNGVWNLFGGR,NWELSVGCSIPGK | Carbamidomethyl [C8],SSAETDSIEER,SSGDNFHAAPNIDHSQDFVR,STTPAFSEEGVLEAEAD…	"sp|Q94A41|AMY3_ARATH Alpha-amylase 3, chloroplastic OS=Arabidopsis thaliana GN=AMY3 PE=2 SV=1"	sp|Q94A41|AMY3_ARATH	"2054.956485,1362.583767,993.488022,1135.577144,1048.544514,1176.6390155,1702.834878,1470.755858,1784.97911,979.581474333,1421.756232,1569.736776,1655.778819,1541.893134,2079.018104,1139.59678,1077.58959,1321.640358,1096.588029,1360.663268,1445.696108,1222.531024,2212.990004,2333.129115,1232.601996,1092.60450267,1734.91322233,1380.713196"	"KWEIPSEPYPEETSLFK,VPLVDDVPDNGNLIGAK,LNENTWLNYR"	AMY3	http://www.uniprot.org/uniprot/Q94A41	36.640361
752813760	826160960	904276480	868483072	764318400	930075392	868453440	951018880	872524992	1019496960	834998208	920547840	sp|P25857|G3PB_ARATH	P25857	3	27	20	47659.003	"99.7,98.6,99.7,99.7,99.7,99.7,99.7,99.7,99.7,99.7,99.7,99.7,99.7,99.7,98.8,95.3,99.0,99.0,99.0,99.7,99.7,99.7,99.7,99.6,99.7,99.6,99.7"	"AAALNIVPTSTGAAK,AAALNIVPTSTGAAK | Deamidated [N5],AVSLVLPQLK,CSDVSTTIDSSLTMVMGDDMVK | Carbamidomethyl [C1] Oxidation [M14 M16 M20],CSDVSTTIDSSLTMVMGDDMVK | Carbamidomethyl [C1] Oxidation [M14 M16],DSPLEVVVLNDSGGVK,GKLNGIALR | Deamidated [N4],GLTAEDVNEAFR,GLTAEDVNEAFRK,GTMTTTHSYTGDQR,GTMTTTHSYTGDQR | Oxidation [M3],IVDNETISVDGK,KDSPLEVVVLNDSGGVK,KGLTAEDVNEAFR,TNPADEECK | Carbamidomethyl [C8],TNPA…	"sp|P25857|G3PB_ARATH Glyceraldehyde-3-phosphate dehydrogenase GAPB, chloroplastic OS=Arabidopsis thaliana GN=GAPB PE=1 SV=2"	"sp|Q9LPW0|G3PA2_ARATH,sp|P25857|G3PB_ARATH,sp|P25856|G3PA1_ARATH"	"1383.7728225,1384.754152,1066.675275,2439.0172832,2423.0247658,1626.846418,941.5657725,1320.634118,1448.72631,1554.6738965,1570.665333,1288.64997067,1754.9413025,1448.7254955,1062.426118,1439.58629,832.455733,833.439663667,811.516588,1147.613624,1821.02219,1771.79384067,1150.671599,1026.582481,1933.8549935,1060.49099,1076.48504"	"AVSLVLPQLK,VLDEEFGIVK,GLTAEDVNEAFR"	GAPB	http://www.uniprot.org/uniprot/P25857	51.230425
32823204	35856992	37568188	37656040	36648132	36983364	31439228	29011896	29477256	31609448	33386000	34441232	sp|Q9LIB2|PHS1_ARATH	Q9LIB2	2	27	26	108584.156	"99.0,99.0,99.7,99.7,99.7,99.7,99.2,99.7,98.9,98.5,98.9,99.7,99.7,99.4,99.7,99.0,99.7,99.7,99.7,99.7,99.7,99.7,99.6,92.0,99.0,96.8,99.7"	"ADQIVNLR,ADYFLVGK,AFFATAQSVR,ALSNAVGNLGLNSAYGDALK,ALSNAVGNLGLNSAYGDALKR,APSEDFDLSSYNSGK,DFPSYIECQEK | Carbamidomethyl [C8],FADNEDLQSEWR,FVPDPTFEEVK,FVPDPTFEEVKK,GLSWEDAWK,HTEAAEALFNAEK,ICFVLYPGDESTEGK | Carbamidomethyl [C2],MANLAVVGGHAVNGVAEIHSEIVK,MSIMNTAGSFK | Oxidation [M1 M4],NDVSYPIK,QQYTLCSASLQDIVAR | Carbamidomethyl [C6],SGGNVNWEEFPEK,TAGEEEEDEVIPEPTVEPPK,TGYTVSPDAMFDIQIK | Oxidation [M10…	sp|Q9LIB2|PHS1_ARATH Alpha-glucan phosphorylase 1 OS=Arabidopsis thaliana GN=PHS1 PE=2 SV=1	"sp|Q9SD76|PHS2_ARATH,sp|Q9LIB2|PHS1_ARATH"	"927.513666,911.475054,1096.566674,1947.007016,2103.104457,1615.700552,1414.607418,1508.653126,1306.643472,1434.738148,1090.50787,1429.68402,1713.79141,2414.274684,1217.54242,934.475452,1851.912807,1491.662562,2194.014773,1800.86189,1878.909736,1784.930682,2224.075143,2256.070392,1034.510594,1050.505094,1564.756926"	"AFFATAQSVR,DFPSYIECQEK | Carbamidomethyl [C8],ADQIVNLR"	PHS1	http://www.uniprot.org/uniprot/Q9LIB2	32.744283
63324064	62761252	59754872	68452912	62468464	64094940	64446724	50273632	66461012	51358280	54825132	67383672	sp|Q9SAC6|GWD1_ARATH	Q9SAC6	1	27	27	156579.84	"99.7,99.7,99.0,99.7,99.4,93.1,99.7,99.7,99.7,99.0,99.7,99.7,99.6,99.7,99.7,99.7,99.7,99.7,98.1,99.7,99.7,96.5,99.0,99.1,93.4,99.5,99.7"	"AGSAAALSSLVNR,AKEEQETTPVFSK,DHWALYAK,EEQETTPVFSK,EKEEYEAAR,ENWVLPSR,EPVTLHWALSQK,EVNDSELSSPSSDNLEDAPPSISLVK,FNIAADLVDEAK,GASVEDLR,GGIMEEWHQK,GLGETLVGAYPGR,GWQFALDMCK | Carbamidomethyl [C9] Oxidation [M8],GYEQLNDAGPEK,HVADFVEPESK,IRDEILVIQR,LLSLQPTSADVVYK,LYGTAQDIEGVIR,MIMSTVGR,NNDSDFYVDFAK,NNGQNFHINLPTER,QELRPLLLK,SLTTLEIYAK,SSDMPWPGDEGEQR,SSDMPWPGDEGEQR | Oxidation [M4],WEQAWAAIK,YAISSEEFTSDLVG…	"sp|Q9SAC6|GWD1_ARATH Alpha-glucan water dikinase 1, chloroplastic OS=Arabidopsis thaliana GN=GWD1 PE=1 SV=2"	sp|Q9SAC6|GWD1_ARATH	"1215.657269,1492.740866,1002.492159,1293.607822,1123.512636,999.513806,1407.75047,2728.291055,1304.661234,845.42387,1213.555263,1288.675924,1270.546298,1319.598712,1256.602672,1253.745564,1532.844522,1433.75009,893.44601,1433.609556,1652.8021005,1108.697538,1137.627342,1589.641744,1605.636872,1101.560402,1715.81662"	"GLGETLVGAYPGR,AGSAAALSSLVNR,LLSLQPTSADVVYK"	GWD1	http://www.uniprot.org/uniprot/Q9SAC6	21.015011
93011728	65247460	86027352	89821088	78786944	89772240	83142056	75085776	81822544	79321512	81149120	98679784	sp|Q9SE60|MTHR1_ARATH	Q9SE60	2	27	20	66287.647	"99.7,99.6,99.7,99.7,99.6,99.3,99.7,95.5,98.8,99.7,99.7,99.7,98.8,99.7,99.7,99.7,94.9,99.7,99.7,92.9,99.7,99.7,99.7,99.7,99.7,96.7,99.7"	"AFPSITYMAVNK,AFPSITYMAVNK | Oxidation [M8],AYGIHFATEMCK | Carbamidomethyl [C11],AYGIHFATEMCK | Carbamidomethyl [C11] Oxidation [M10],AYLEFFCSK | Carbamidomethyl [C7],DEAFEIWSR,DKLDTLVEK,EDVRPIFWANRPK,ELCIGNLK | Carbamidomethyl [C3],EVIQPTIVDPASFK,GWNDFPHGR,IDHALETIR,IINEQLGK,INSNGFLTINSQPSVNAAK,IPAELTAALEPIK,IPAELTAALEPIKDNDEAVK,KLQQEWVVPLK,LQQEWVVPLK,SDSPAIGWGGPGGYVYQK,SIEDVQEK,SNGIQNVLALR,SNGI…	sp|Q9SE60|MTHR1_ARATH Methylenetetrahydrofolate reductase 1 OS=Arabidopsis thaliana GN=MTHFR1 PE=1 SV=1	"sp|O80585|MTHR2_ARATH,sp|Q9SE60|MTHR1_ARATH"	"1340.678478,1356.673468,1426.636819,1442.632614,1163.531894,1151.524466,1059.581556,1626.862756,945.495326,1542.828548,1084.483482,1066.5767325,913.522978,1974.016851,1364.7910925,2136.129477,1366.796484,1238.702074,1837.864642,946.460708,1183.667268,1184.649596,1672.794092,1548.682998,1307.598538,2365.27368,1564.766448"	"IINEQLGK,ELCIGNLK | Carbamidomethyl [C3],EVIQPTIVDPASFK"	MTHFR1	http://www.uniprot.org/uniprot/Q9SE60	41.047297
16546723	18170132	18397664	18585572	18139796	19827076	17183764	14785770	16133012	15478831	17090636	19576192	sp|Q9SJT9|COPA2_ARATH	Q9SJT9	2	27	13	136465.264	"99.6,99.5,99.0,99.7,99.7,99.7,99.7,99.7,99.7,99.7,99.7,99.7,99.7,99.7,99.7,99.7,99.7,99.6,99.7,99.2,96.1,99.7,99.7,99.6,98.2,98.7,99.0"	"AFSSSPVVPLAIER,AITINATEYIFK,DSQVIPIR,ERPAFALSGDSLFYAK,FDEHEGPVR,FSQMNSDLFGGVDAIVK | Oxidation [M4],GAVDEEEEDVEGDWGEGLDK,GIFEGGLESANR,GTGGSAVFIAR,GVHFHNSQPLFVSGGDDYK,LAIELGDNVPSLPEGK,NMTDATTLNYDFR,NMTDATTLNYDFR | Oxidation [M2],NNVMGQFHNALYLGDVK,NPFVICGSTYVPIYK | Carbamidomethyl [C6],QDIIVSNSEDK,RPGTPSLNQSPR,SASPADDLMR | Oxidation [M9],SLLDTNPTIESQAR,SSLAAEQAAAGSFDTAMR | Oxidation [M17],SSTFVTPPQ…	sp|Q9SJT9|COPA2_ARATH Coatomer subunit alpha-2 OS=Arabidopsis thaliana GN=At2g21390 PE=2 SV=1	"sp|Q94A40|COPA1_ARATH,sp|Q9SJT9|COPA2_ARATH"	"1471.80242,1382.742062,926.518976,1770.8932965,1084.493619,1842.878878,2176.89244533,1248.60891,1034.55185,2102.983966,1650.883214,1560.686298,1576.682484,1918.936782,1756.883702,1246.605042,1308.688203,1077.47608,1543.784644,1798.814874,2220.09383,1161.663482,2479.1867355,1363.656538,1364.638896,987.477183,1080.476154"	"AFSSSPVVPLAIER,LAIELGDNVPSLPEGK,GIFEGGLESANR"	At2g21390	http://www.uniprot.org/uniprot/Q9SJT9	28.16092
348514912	368870304	379170272	460848512	446268416	450852896	359732736	296225312	378957152	387449504	407644096	445181664	sp|P21238|CPNA1_ARATH	P21238	1	26	26	62071.262	"99.7,99.7,99.7,99.7,99.7,99.7,97.6,99.7,99.7,99.7,99.7,99.7,99.7,99.7,99.7,99.7,99.7,99.0,99.7,99.7,99.7,99.7,99.7,99.7,96.6,99.7"	"AALQAGIDK,AIELPNAMENAGAALIR,AIELPNAMENAGAALIR | Oxidation [M8],APLLIIAEDVTGEALATLVVNK,AVASISAGNDDLIGSMIADAIDK,CALQNAASVAGMVLTTQAIVVDKPKPK | Carbamidomethyl [C1] Oxidation [M12],DIIPILEK,DSTTLIADAASK,DSTTLIADAASKDELQAR,EIAFDQHSR,ELFETDSVYDSEK,ETFEDADER,GVLNVVAVK,GYISPQFVTNPEK,HGLLSVTSGANPVSLK,KELFETDSVYDSEK,LADCVGLTLGPR | Carbamidomethyl [C4],LGADIVQK,LLAEFENAR,LSGGVAVIK,NVVLDEFGSPK,TNDSAGDGTTTAS…	"sp|P21238|CPNA1_ARATH Chaperonin 60 subunit alpha 1, chloroplastic OS=Arabidopsis thaliana GN=CPN60A1 PE=1 SV=2"	sp|P21238|CPNA1_ARATH	"885.4917935,1752.91897,1768.9147435,2249.290023,2246.111904,2825.516216,939.56431,1191.598505,1903.940897,1101.520314,1560.683285,1110.4469565,897.564796,1478.739748,1578.87270267,1688.777712,1270.6701625,842.48603,1061.551096,842.5224945,1203.61407,1649.78552133,1256.6969735,1289.609488,3113.414061,1042.577094"	"LLAEFENAR,LGADIVQK,TVQGLIEELQK"	CPN60A1	http://www.uniprot.org/uniprot/P21238	54.948805
27037008	26364332	26608064	22599588	22449332	21710352	29300544	24036080	26277484	18174004	25987584	23179704	sp|Q8RXD9|DPE2_ARATH	Q8RXD9	1	26	26	109775.303	"98.1,99.7,99.7,99.7,99.7,99.7,99.7,98.6,99.7,99.7,99.7,98.7,99.7,99.7,99.7,99.7,99.7,99.7,99.7,97.3,97.8,99.6,99.7,99.2,99.7,99.7"	"AWWEEDEER,DFFETSDHSQWGTFSDYTDDK,DLWQSGDQALPFR,DQTLNSSTFQK,DVIFHHSFDVK,EDSIGFESGGNR,EEYTTRPATEETINDPTNPK,EGIWDFDR,ELSLHSIGSK,FGIPSNYDYMTVCAPSCHDCSTLR | Carbamidomethyl [C13 C17 C20] Oxidation [M10],FNIEDTSSFQDLDDHSK,FRPSIPLSQEELEK,GEVIANGSTKPNP,ICCPDIGEGTSVYVLGTPEK | Carbamidomethyl [C2 C3],IDHILGFFR,IWELPAHAMTGLVGK,LVVPETLTGGESVHLR,LYYDYYFQR,MNTSTGAPPDYFDK,MPSESDVK,NLVSSSGR,QEYIVMSDGLFR,SDQDDSVV…	sp|Q8RXD9|DPE2_ARATH 4-alpha-glucanotransferase DPE2 OS=Arabidopsis thaliana GN=DPE2 PE=1 SV=1	sp|Q8RXD9|DPE2_ARATH	"1248.504582,2527.005825,1531.7412675,1267.60362,1342.6672145,1266.547576,2305.070592,1036.460992,1069.575735,2866.182558,1996.864437,1671.88258,1282.649868,2194.02654,1116.608079,1621.865373,1705.936011,1329.602194,1542.66574,891.400558,818.424078,1456.699926,1365.641288,1328.655862,1260.689913,1123.6599885"	"LVVPETLTGGESVHLR,DLWQSGDQALPFR,DQTLNSSTFQK"	DPE2	http://www.uniprot.org/uniprot/Q8RXD9	35.602094
235211248	232211744	224842320	230385808	213600896	227187664	253608240	256256992	245152416	243371440	215560416	273277600	sp|Q9C9W5|HPR1_ARATH	Q9C9W5	1	26	26	42247.358	"99.7,99.7,99.0,99.7,99.3,99.7,99.7,99.7,99.7,99.7,99.7,99.7,99.7,99.7,99.7,99.7,99.7,99.2,99.7,99.0,99.7,99.7,99.7,99.7,99.7,99.7"	"AFSNMAVGYNNVDVEAANK,AFSNMAVGYNNVDVEAANK | Oxidation [M5],ALGLPVSK,ANGEQPVTWK,ANGEQPVTWK | Deamidated [N2],ASSMEEVLR,ASSMEEVLR | Oxidation [M4],EADLISLHPVLDK,EAILVNCSR | Carbamidomethyl [C7],EGMATLAALNVLGR | Oxidation [M3],FVTAYGQFLK,GPVIDEAALVEHLK,GQTVGVIGAGR,GYPIWHDPNR,GYPIWHDPNRVDPFLNENASPPNASPSIVNSK,IVEADEFMR,IVEADEFMR | Oxidation [M8],KEAILVNCSR | Carbamidomethyl [C8],NAIVVPHIASASK,TTYHLVNK,…	"sp|Q9C9W5|HPR1_ARATH Glycerate dehydrogenase HPR, peroxisomal OS=Arabidopsis thaliana GN=HPR PE=1 SV=1"	sp|Q9C9W5|HPR1_ARATH	"2012.925462,2028.920052,783.485544,1128.555926,1129.540518,1020.49134,1036.48587,1448.787582,1060.533328,1430.75433,1172.623684,1489.812419,1013.562076,1253.594079,3531.718746,1108.522484,1124.51712,1188.626199,1305.741519,974.518045,2296.1341875,2237.09058,1171.638096,1187.631191,1372.6920535,2816.492586"	"ALGLPVSK,GQTVGVIGAGR,GPVIDEAALVEHLK"	HPR	http://www.uniprot.org/uniprot/Q9C9W5	65.025907
14427816	12619259	13817767	12852120	10533023	11138204	14174505	10809420	13462573	12338114	13635541	12630305	tr|F4ISU2|F4ISU2_ARATH	F4ISU2	1	26	26	148611.891	"99.7,99.7,99.7,99.7,93.6,99.7,99.0,99.0,99.5,93.9,99.7,99.4,99.6,99.7,99.7,99.7,92.2,99.7,98.8,97.6,99.7,99.7,99.7,99.7,96.8,98.3"	"AAGLQESEVMEK,AAGLQESEVMEK | Oxidation [M10],ALEFSELLK,AVTEFESMVK,DSEASSLTEK,EELQSVIAK,ELELELER,ELLESLSK,ELQAAQSSIDEQK,ELTENLNAVTSEK,ENVENAATASVK,EQTANELEASK,ESGDLAEVNLK,IQELEGLIGSGSVEK,ISESENLLESIR,LAAAESVNEK,LIELEEGLK,LIELEEGLKR,LQEHEHIAGER,NLELEDVVR,NLESTIEELGAK,SIELEGLCQSSQSK | Carbamidomethyl [C8],SLEDALQSHDAK,SLEELHSEAGSAAAAATQK,YESENTHLK,YESENTHLKDELLSAK"	tr|F4ISU2|F4ISU2_ARATH Uncharacterized protein OS=Arabidopsis thaliana GN=At2g32240 PE=1 SV=1	tr|F4ISU2|F4ISU2_ARATH	"1290.611462,1306.606836,1048.580536,1139.554078,1065.482688,1015.554842,1029.534334,917.506978,1445.697986,1446.73269,1231.604276,1218.570664,1173.58662,1557.824374,1388.712586,1030.529832,1042.59068,1198.692444,1317.639618,1085.571108,1302.665286,1564.739574,1312.626787,1869.904806,1119.518445,1875.921276"	"ELTENLNAVTSEK,EELQSVIAK,ALEFSELLK"	At2g32240	http://www.uniprot.org/uniprot/F4ISU2	19.954989
31096868	31568000	34977536	35598688	32359076	39204720	33380116	36958408	33572316	35543268	31203256	39083616	tr|Q8VZ10|Q8VZ10_ARATH	Q8VZ10	1	26	26	114401.056	"99.5,99.7,99.7,99.5,99.0,95.6,99.7,99.6,98.6,99.7,98.6,98.7,99.7,99.7,99.7,99.7,99.7,99.7,99.1,99.7,99.7,99.7,99.7,99.7,99.5,99.7"	"ALDLQTGGSR,ALWNALVGAK,APDAGGLQLQGTR,EAYIADSESSSIR,EIDFVNER,FFEIYLDK,FLGGVASVK,GAQLSEPAGLAITENGR,GFDPDAAK,ISLPDGYHFSK,LAIDTLNNR,LFISDSNHNR,LFVADTNNSLIR,LSVAAESPAATIATDDWGK,NLLYVADTENHALR,NLNGSTPQTTSFAQPSGISLGPDLK,NSTAMLEENTVSDK,NSTAMLEENTVSDK | Oxidation [M5],NVLDSTPLPTR,SPSFTQNQGEGR,TSANGFQGSR,TTLSEAILK,VFSGNGYER,VSAVLFDMDGVLCNSEDLSR | Carbamidomethyl [C13] Oxidation [M8],VVTLAGTGK,YDISHPVVNDGDM…	tr|Q8VZ10|Q8VZ10_ARATH Haloacid dehalogenase-like hydrolase family protein OS=Arabidopsis thaliana GN=At1g56500 PE=1 SV=1	tr|Q8VZ10|Q8VZ10_ARATH	"1016.525094,1041.5971,1282.662564,1426.657238,1020.487088,1073.543888,876.507096,1682.859744,819.376128,1262.629722,1028.563504,1201.583835,1361.729026,1901.937738,1627.831661,2529.272469,1537.692632,1553.688692,1211.650748,1306.589224,1023.47276,974.564772,1027.472632,2242.0251575,844.501298,2096.908644"	"TTLSEAILK,FLGGVASVK,ALWNALVGAK"	At1g56500	http://www.uniprot.org/uniprot/Q8VZ10	29.099526
24334064	27559028	26502360	31323368	27538612	31517516	31204248	30360096	32167500	33235000	29079932	33001852	sp|O23553|BAM3_ARATH	O23553	1	25	25	61352.475	"99.7,98.0,99.3,99.7,99.0,99.7,99.7,99.7,99.7,99.7,98.6,99.7,99.7,99.7,99.7,99.7,99.7,99.7,99.7,99.7,99.7,99.1,99.3,99.7,99.0"	"AMNASLMALK,AMNASLMALK | Oxidation [M2 M7],AMNASLMALK | Oxidation [M7],DGEQPEHANCSPEGLVK | Carbamidomethyl [C10],DGTWNSEYGK,EDTTGSDLYVGFVK,FPGIGEFQCYDK | Carbamidomethyl [C9],LLEHGDQLLSSAK,MKPPTYQFQAK,NHDGYLPIAK,NLPEDTEFFR,NPDLVYTDK,NPEYISLGCDSVPVLR | Carbamidomethyl [C9],NQESSSNNMTFAK,NQESSSNNMTFAK | Oxidation [M9],QAGTELAGENALER,SDSGNGLTAFTYLR,SHAAELTAGYYNTR,SSLQAYAESIGK,TFTPEGETLEK,TNWGTSGPHDA…	"sp|O23553|BAM3_ARATH Beta-amylase 3, chloroplastic OS=Arabidopsis thaliana GN=BAM3 PE=1 SV=3"	sp|O23553|BAM3_ARATH	"1048.541368,1080.530418,1064.536392,1865.820864,1155.483016,1529.723896,1459.643356,1409.751195,1337.679864,1126.576786,1266.588138,1063.518168,1817.896999,1456.625346,1472.618576,1457.710094,1500.718468,1552.727043,1252.630222,1250.60277,1618.7011105,1355.655941,1352.6746495,1513.714932,1455.641942"	"LLEHGDQLLSSAK,SSLQAYAESIGK,YPSYPESNGTWR"	BAM3	http://www.uniprot.org/uniprot/O23553	49.817518
146728608	136582000	142169296	144061504	120881088	135501392	143906304	169425904	142336544	161229424	144510672	128401616	sp|P25819|CATA2_ARATH	P25819	4	25	16	56930.594	"99.7,99.3,99.7,99.7,99.7,99.2,99.7,99.7,99.0,99.7,99.7,99.7,99.7,99.7,99.7,99.7,99.0,99.7,99.7,93.8,99.6,99.7,99.7,99.7,99.1"	"APGVQTPVIVR,APGVQTPVIVR | Deamidated [Q5],DEEVNYFPSR,EGNFDLVGNNFPVFFIR,ENNFKEPGER,FHWKPTCGVK | Carbamidomethyl [C7],FPDMVHALKPNPK,FPDMVHALKPNPK | Oxidation [M4],FSTVIHER,GPILLEDYHLVEK,HMDGSGVNTYMLINK,HMDGSGVNTYMLINK | Oxidation [M11],HMDGSGVNTYMLINK | Oxidation [M2 M11],HMDGSGVNTYMLINK | Oxidation [M2],LGPNYLQLPVNAPK,LGPNYLQLPVNAPK | Deamidated [N4],SHIQENWR,SLLEEDAIR,VGGTNHSHATQDLYDSIAAGNYPEWK,…	sp|P25819|CATA2_ARATH Catalase-2 OS=Arabidopsis thaliana GN=CAT2 PE=2 SV=3	"tr|B9DG18|B9DG18_ARATH,sp|Q42547|CATA3_ARATH,sp|Q96528|CATA1_ARATH,sp|P25819|CATA2_ARATH"	"1135.6715085,1136.655266,1254.55163933,1983.977328,1218.562614,1258.627773,1492.786125,1508.781131,987.5131565,1524.82157967,1678.781192,1694.77578,1710.770637,1694.7744,1522.85026067,1523.834442,1068.509766,1044.545658,2830.29494333,2831.281953,1071.534996,1175.56423,3505.6158495,3522.596592,3521.609248"	"WIDALSDPR,GPILLEDYHLVEK,SLLEEDAIR"	CAT2	http://www.uniprot.org/uniprot/P25819	43.902439
36833512	37091576	39229372	41035276	35321572	41830800	41066504	38647740	41301124	40086216	34837404	41900508	sp|P29513|TBB5_ARATH	P29513	9	25	7	50341.974	"99.7,99.7,99.7,99.7,99.7,99.7,99.7,99.7,99.7,99.7,99.0,97.4,99.7,99.7,99.7,99.7,99.7,99.7,98.7,97.4,99.3,99.7,99.7,99.7,99.7"	"AVLMDLEPGTMDSIR,AVLMDLEPGTMDSIR | Oxidation [M11],AVLMDLEPGTMDSIR | Oxidation [M4 M11],AVLMDLEPGTMDSIR | Oxidation [M4],EAENCDCLQGFQVCHSLGGGTGSGMGTLLISK | Carbamidomethyl [C5 C7 C14] Oxidation [M25],EILHIQGGQCGNQIGSK | Carbamidomethyl [C10],EVDEQILNIQNK,FPGQLNSDLR,FWEVICDEHGIDSTGR | Carbamidomethyl [C6],INVYYNEASGGR,IREEYPDR,KEAENCDCLQGFQVCHSLGGGTGSGMGTLLISK | Carbamidomethyl [C6 C8 C15],KLAVNLI…	sp|P29513|TBB5_ARATH Tubulin beta-5 chain OS=Arabidopsis thaliana GN=TUBB5 PE=2 SV=1	"sp|P29513|TBB5_ARATH,sp|P29516|TBB8_ARATH,sp|Q56YW9|TBB2_ARATH,sp|P29515|TBB7_ARATH,sp|P29517|TBB9_ARATH,sp|P29514|TBB6_ARATH,sp|P24636|TBB4_ARATH,sp|P12411|TBB1_ARATH,sp|Q9ASR0|TBB3_ARATH"	"1646.80130567,1662.79408,1678.7893725,1662.7945374,3398.501484,1837.91265875,1441.741368,1145.583278,1919.84655,1341.630456,1076.5251745,3510.60372,1266.7818525,1138.686302,1920.870808,1904.87614,1904.874188,1415.682528,1064.419598,1096.4077,1080.415024,1214.576379,1230.56879267,1040.566382,1366.636198"	"YSGDTADLQLER,EVDEQILNIQNK,YLTASAIFR"	TUBB5	http://www.uniprot.org/uniprot/P29513	45.211581
33426864	29033692	33937808	36095468	35910616	34395044	31163676	32732680	34143416	36591912	26545864	36085572	sp|Q0WW26|COPG_ARATH	Q0WW26	1	25	25	98489.499	"99.7,99.7,99.7,99.7,99.0,99.5,99.0,99.7,99.0,99.7,99.0,99.7,99.7,99.7,99.7,99.7,99.7,99.7,99.7,99.7,99.7,99.7,99.7,98.6,99.7"	"AEMVILEAAR,ATLYLSVLGGDGTVDTDK,AVMDLLGMQTCEGTETIPLNAR | Carbamidomethyl [C11] Oxidation [M3 M8],CIYDSDDEVR | Carbamidomethyl [C1],EEGGFEYK,ELSPSSDEVIIVTSSLMK | Oxidation [M17],ESLGEAVK,FGFMVESLKPR,GAVLQEAR,IIDGTLLTQIER,IVVVDAIR,KPTGLGAPPAAPASGFDGYER,LLYLLNQGESFTK,NAWESMDEEDER,NAWESMDEEDER | Oxidation [M6],NYEPSEEAFDINSVPK,VAMTHPMAVTNCNIDMESLISDQNR | Carbamidomethyl [C12],VAMTHPMAVTNCNIDMESLISDQNR…	sp|Q0WW26|COPG_ARATH Coatomer subunit gamma OS=Arabidopsis thaliana GN=At4g34450 PE=1 SV=2	sp|Q0WW26|COPG_ARATH	"1101.58713,1823.917466,2451.139221,1270.513688,957.407526,1949.98748,831.433212,1309.687188,842.460952,1370.775334,883.549352,2058.023042,1524.818366,1509.568251,1525.561978,1837.837462,2846.284185,2894.269113,2878.271184,2862.277821,1035.498852,1355.69737,1185.578188,1037.5610495,1431.67295"	"VFNDPQVDPR,VDEYGLGQR,KPTGLGAPPAAPASGFDGYER"	At4g34450	http://www.uniprot.org/uniprot/Q0WW26	30.699774
32446080	36724992	35743532	36696836	33034468	36576848	37032864	35698420	36705608	33450696	33674624	36434600	sp|Q8H0S9|PSA_ARATH	Q8H0S9	5	25	0	99157.4	"99.7,99.7,99.3,92.1,99.7,96.3,99.7,96.6,99.7,99.7,99.7,99.5,99.7,99.0,98.2,99.7,99.0,99.7,99.7,99.7,99.6,99.7,99.7,99.7,99.5"	"DDILADFYNK,DITLSSVHHDGTVQTISGSSTILR,DQEFSSDMGSR,DQEFSSDMGSR | Oxidation [M8],EGDYQLDSR,FSQEIPPTPGQPTK,FVQGLGSVLSDSSLDK,GIDLYFER,GSSAALVLDGHDLK,ITFYQDRPDIMAK,ITFYQDRPDIMAK | Oxidation [M11],IWTPAEDLPK,LLDHPAFDLR,LNPQVASR,MDNFYTVTVYEK,QLASELKEELLK,SLNIFNSK,SSGNFCTQCEAEGFR | Carbamidomethyl [C6 C9],STEAYVFDHSNMAR,STEAYVFDHSNMAR | Oxidation [M12],TAHAMYSLK,TRDDILADFYNK,VVSSYNADAR,VYSLIGGFCGSPVNFHAK …	sp|Q8H0S9|PSA_ARATH Puromycin-sensitive aminopeptidase OS=Arabidopsis thaliana GN=MPA1 PE=2 SV=1	"tr|F4I3R4|F4I3R4_ARATH,sp|Q8H0S9|PSA_ARATH,tr|F4I3R0|F4I3R0_ARATH,tr|B3H621|B3H621_ARATH,tr|F4I3R1|F4I3R1_ARATH"	"1212.566508,2523.292315,1257.492038,1273.488514,1081.467204,1525.777318,1650.8466,1011.502694,1381.7197445,1596.79686375,1612.791363,1168.612226,1195.634836,883.48723,1508.682464,1399.792043,921.492622,1748.688604,1626.7099485,1642.7039655,1020.506277,1469.71524,1080.519846,1951.960056,1028.540706"	"FVQGLGSVLSDSSLDK,WEAGQVLAR,LNPQVASR"	MPA1	http://www.uniprot.org/uniprot/Q8H0S9	28.992072
119077112	121732808	131479456	150034944	135790832	146760160	121118784	87002464	121053176	93116024	139428192	126459872	sp|Q9CA67|CHLP_ARATH	Q9CA67	1	25	25	51836.92	"99.7,99.7,99.7,99.7,99.7,99.0,99.7,99.7,99.7,99.7,99.7,98.2,99.0,99.7,99.7,99.7,99.7,99.7,96.2,99.7,99.7,99.7,99.7,99.7,99.7"	"CDHVAVGTGTVTHK | Carbamidomethyl [C1],CSGEGIYFAAK | Carbamidomethyl [C1],EAFVEMCNDEYVQK | Carbamidomethyl [C7],EAFVEMCNDEYVQK | Carbamidomethyl [C7] Oxidation [M6],EHEYIGMVR,EVLDAYLR,LAVNTIGSLVR,MCAEAIVEGSQNGK | Carbamidomethyl [C2],MCAEAIVEGSQNGK | Carbamidomethyl [C2] Oxidation [M1],MDHPENWDSPYTLHYTEYDGK,MDHPENWDSPYTLHYTEYDGK | Oxidation [M1],MIDEGDLR,MIDEGDLR | Oxidation [M1],MISPSNIAVDIGR | …	"sp|Q9CA67|CHLP_ARATH Geranylgeranyl diphosphate reductase, chloroplastic OS=Arabidopsis thaliana GN=CHLP PE=1 SV=1"	sp|Q9CA67|CHLP_ARATH	"1480.70710767,1201.541404,1760.739126,1776.733908,1132.5339445,977.518354,1141.682022,1492.664578,1508.66104,2597.0791845,2613.0750065,947.43818,963.43258,1387.711886,1166.532354,1182.526086,1133.619177,1218.6974695,1219.680258,1832.82318767,1620.74171,1262.6867225,1124.607564,2690.460882,1533.816237"	"VAPGSPLEDIK,SGATVINGLFLK,VALVGDAAGYVTK"	CHLP	http://www.uniprot.org/uniprot/Q9CA67	52.034261
24385452	22197068	23752800	26304576	24051228	24576048	20802280	22847508	21691456	24336580	21910712	23651028	sp|Q9FFC7|SYAP_ARATH	Q9FFC7	1	25	25	107829.033	"99.7,99.7,95.5,99.0,98.8,99.7,99.7,99.7,99.7,99.7,99.7,99.7,99.7,99.7,99.0,99.6,99.7,99.4,99.7,99.7,99.7,99.0,99.7,99.7,99.7"	"AFTVGTSQTIR,AVVYLISDGVSPSNIGR,DVSGDSIR,FLEFFASR,GAFLPAVAEK,GYDEDVDLGDDTR,IISEQGIASGIR,ISELANISYDSANDK,KPENLPSALEK,LCGGGGGGKPNFAQAGGR | Carbamidomethyl [C2],LTVEDDADMTK,LTVEDDADMTK | Oxidation [M9],NIADTEFLGYDSLSAR,NIDTGLGLER,SGALEVGK,SLGINGDMNGNLK | Oxidation [M8],SLLVNGKPVIR,SSSVSVQPVSEDAK,TNDLENVGK,VENLLEELR,VHHTATHLLQSALK,VLPLADAK,VLVESMDDTDADSLK,VLVESMDDTDADSLK | Oxidation [M6],VVGQETSQAGSLV…	"sp|Q9FFC7|SYAP_ARATH Alanine--tRNA ligase, chloroplastic/mitochondrial OS=Arabidopsis thaliana GN=EMB86 PE=1 SV=2"	sp|Q9FFC7|SYAP_ARATH	"1179.624626,1745.93351,847.40277,1015.51341,1001.553672,1468.594958,1242.692982,1638.778912,1224.671594,1659.790518,1236.553842,1252.54888,1770.84084,1086.566574,759.412466,1347.643548,1194.744276,1418.686844,988.482112,1113.602542,1554.862414,825.49572,1636.749876,1652.743922,1762.885592"	"GAFLPAVAEK,VLPLADAK,IISEQGIASGIR"	EMB86	http://www.uniprot.org/uniprot/Q9FFC7	28.425358
58931224	84930784	73315056	67404056	57696772	72401536	71747912	52843704	78478952	51779756	62452712	65356412	sp|Q9XI01|PDI11_ARATH	Q9XI01	2	25	22	55600.877	"99.7,98.2,99.7,99.7,99.7,99.7,97.9,99.7,99.0,99.6,99.2,99.7,99.7,99.7,99.0,99.7,99.7,99.7,99.7,99.7,99.7,99.7,99.7,99.7,99.7"	"AASALSSNVPPVVLAK,AVQEYNGPR,DFDGEALEK,EAEGIVTYLK,EDFISFVDK,EFATQYEVQGFPTIK,FFESTNTK,GESSVTGPVVR,GFPTIYFK,IDASEETNR,KEEETTEEVKDEL,LDATANDFPK,LFKPFDEQFVDSK,LSGSEFDSFMAIAEK | Oxidation [M10],QLAPEYEK,QSGPASAEIK,SADDASEVVSDK,SADDASEVVSDKK,SASGNVVVYEGDR,SELDFAHTSDAK,SQPIPAENNEPVK,TKEDFISFVDK,TNVEVDQIESWVK,VVVSDSLDDIVLNSGK,VVVVGIFPK"	sp|Q9XI01|PDI11_ARATH Protein disulfide isomerase-like 1-1 OS=Arabidopsis thaliana GN=PDIL1-1 PE=1 SV=1	"sp|Q9XI01|PDI11_ARATH,sp|Q9SRG3|PDI12_ARATH"	"1522.8718895,1032.498906,1022.4563475,1121.596864,1098.52373,1756.8675045,972.45546,1086.566804,971.511438,1033.46696,1577.73074,1090.529506,1598.798213,1646.749494,976.485744,986.502722,1221.535294,1349.6307095,1351.636039,1319.599266,1421.714506,1327.664408,1545.76793,1658.872617,956.605596"	"LDATANDFPK,GESSVTGPVVR,VVVSDSLDDIVLNSGK"	PDIL1	http://www.uniprot.org/uniprot/Q9XI01	52.694611
15563087	14345074	16827356	18057128	16286204	16312918	17172696	12696532	16445759	14971019	16928508	17992828	tr|Q9FLT0|Q9FLT0_ARATH	Q9FLT0	3	25	14	107741.029	"98.9,98.6,99.7,99.7,96.1,99.7,99.7,99.7,99.7,99.6,98.2,99.7,99.0,99.7,96.9,94.6,99.7,99.7,99.7,99.7,99.7,99.7,97.0,99.7,99.7"	"AIHDQNFTGK,AMIVNGPR,DAGEYLHTVTLESGK,DAPIIGSFNPK,DFLPSLQR,DSPALHIADLTVASAK,EEKPAPYAR,FNNLIGSVYYSDGDTVK,FYVQTVGDQK,GEPYSEEAIALMR | Oxidation [M12],GGIDEPFAWESR,GKPMEGIVEQVR,GKPMEGIVEQVR | Oxidation [M4],ISPGDGVTTSGAGDR,LVVQNGWAK,MQTGFGADR | Oxidation [M1],QAALDALEK,REEKPAPYAR,SNHYDALLAAEAR,TGTFLGSMWEK,TNAGTYLLEAGLAK,VASIQNQLAALSLK,VPGAAEASIR,VVVTEVLGGGR,YVEWSANMLDEEAK"	tr|Q9FLT0|Q9FLT0_ARATH 100 kDa coactivator-like protein OS=Arabidopsis thaliana GN=Tudor2 PE=1 SV=1	"tr|F4K6N0|F4K6N0_ARATH,tr|Q9FLT0|Q9FLT0_ARATH,tr|Q8VZG7|Q8VZG7_ARATH"	"1129.551732,856.458872,1618.785016,1157.6083795,974.518516,1607.851269,1059.533769,1890.900069,1183.587068,1480.686956,1362.619594,1341.704085,1357.7022815,1388.652298,1013.565852,997.428328,957.512794,1215.633816,1429.695129,1255.589408,1420.7551295,1454.844722,969.523038,1084.62292,1683.745788"	"FYVQTVGDQK,LVVQNGWAK,TNAGTYLLEAGLAK"	Tudor2	http://www.uniprot.org/uniprot/Q9FLT0	27.51269
34663656	118398384	55081140	65832472	35489676	94860048	39415232	31462872	86862048	202611504	71989328	24903836	sp|K2C1_HUMAN|	K2C1_HUMAN	2	24	22	65885.685	"99.5,98.3,98.0,99.7,99.7,99.7,99.4,99.7,99.7,99.7,99.7,99.2,99.4,99.4,99.7,99.0,99.7,99.7,99.1,99.7,99.7,99.7,99.0,99.7"	"AEAESLYQSK,DYQELMNTK,DYQELMNTK | Oxidation [M6],FLEQQNQVLQTK,FSSCGGGGGSFGAGGGFGSR | Carbamidomethyl [C4],GGGGGGYGSGGSSYGSGGGSYGSGGGGGGGR,GGSGGGGGGSSGGRGSGGGSSGGSIGGR,GSYGSGGSSYGSGGGSYGSGGGGGGHGSYGSGSSSGGYR,LNDLEDALQQAK,MSGECAPNVSVSVSTSHTTISGGGSR | Carbamidomethyl [C5],NKYEDEINKR,NMQDMVEDYR,NMQDMVEDYR | Oxidation [M2 M5],NMQDMVEDYR | Oxidation [M5],QISNLQQSISDAEQR,SEIDNVKK,SGGGFSSGSAGIINYQR,SKAEA…	sp|K2C1_HUMAN|	"sp|K2C1_HUMAN|,sp|K22E_HUMAN|"	"1124.534338,1140.512124,1156.506871,1474.777238,1764.725823,2382.947808,2078.898204,3311.301375,1356.687608,2564.159991,1307.646915,1299.522032,1331.51182467,1315.516388,1715.844034,931.496121,1656.785742,1339.6614195,873.491918,1032.50899,1264.630096,1392.72554,1065.5086945,1178.592576"	"TLLEGEESR,TNAENEFVTIK,LNDLEDALQQAK"		http://www.uniprot.org/uniprot/K2C1_HUMAN	44.945568
23878956	25326240	25116008	29413736	25065408	25215456	29136028	23223100	27553984	22276524	26843344	27912316	sp|P36428|SYA_ARATH	P36428	1	24	24	110487.941	"99.7,99.7,99.7,99.7,99.7,99.7,98.6,98.1,95.9,99.7,99.7,98.7,99.7,96.1,99.5,99.1,99.7,99.7,95.0,99.4,99.0,98.6,97.6,99.7"	"AFALLSEEGIAK,AGLQPDNEAR,AGVSATDDSFK,AVFGEVYPDPVR,DNFWEMGDTGPCGPCTEIHYDR | Carbamidomethyl [C12 C15],DNFWEMGDTGPCGPCTEIHYDR | Carbamidomethyl [C12 C15] Oxidation [M6],DTYVDFFR,EAVLSEAK,EEEASFCK | Carbamidomethyl [C7],ESDGSLKPLPAK,EVLGDHIDQK,GLLVDVDGFNK,HNDLDDVGK,HVDTGMGFER,IASLQNEVR,IYATYFGGDEK,LATEAAESAASDGK,QIKDELDVFSK,TLSFAIADGSRPGNEGR,VDAAIIPAAK,VGPEDVDR,VMGDVFTELK,VYGLPTDR,YIWFQDHESELK"	sp|P36428|SYA_ARATH Alanine--tRNA ligase OS=Arabidopsis thaliana GN=ALATS PE=1 SV=3	sp|P36428|SYA_ARATH	"1247.6751,1069.51548,1096.504002,1347.681638,2656.041153,2672.03661,1061.481586,845.449258,998.400814,1240.666011,1152.577156,1175.618502,1011.46234,1147.507092,1028.56145,1262.58066,1319.619426,1320.693192,1746.862776,967.570964,885.419112,1137.573658,919.476196,1593.74478"	"AVFGEVYPDPVR,AGVSATDDSFK,GLLVDVDGFNK"	ALATS	http://www.uniprot.org/uniprot/P36428	25.224327
35470732	45714144	39787268	34136384	29582156	29493464	44234984	25385056	42817836	26831072	44122820	33611760	sp|P54609|CD48A_ARATH	P54609	3	24	8	89392.345	"98.9,91.6,96.4,99.7,99.7,98.8,99.7,99.7,99.0,99.3,99.0,99.7,99.0,99.7,99.6,99.7,99.7,99.7,99.7,99.6,99.5,99.7,99.7,99.7"	"AAHFEESMK,AHVIVMGATNRPNSIDPALR,AHVIVMGATNRPNSIDPALR | Oxidation [M6],AIANECQANFISVK | Carbamidomethyl [C6],DFSTAILER,DVDIGALAK,EIDIGVPDEIGR,ELQETVQYPVEHPEK,ELVELPLR,GILLYGPPGSGK,GVLFYGPPGCGK | Carbamidomethyl [C10],IVSQLLTLMDGLK | Oxidation [M9],KGDLFLVR,LAEDVDLER,LAGESESNLR,LVVDEAINDDNSVVSLHPATMEK,SENPEAMEEDGVDEVSEIK | Oxidation [M7],VIETDPAEYCVVAPDTEIFCEGEPVKR | Carbamidomethyl [C10 C20],VLNQL…	sp|P54609|CD48A_ARATH Cell division control protein 48 homolog A OS=Arabidopsis thaliana GN=CDC48A PE=1 SV=1	"sp|Q9SCN8|CD48D_ARATH,sp|P54609|CD48A_ARATH,sp|Q9LZF6|CD48E_ARATH"	"1048.464774,2131.131147,2147.1271,1563.771652,1050.534374,900.491548,1311.666154,1824.889759,967.570028,1157.643952,1250.611194,1445.815636,946.559968,1058.525142,1074.530108,2495.224959,2121.890734,3122.458704,1675.826854,1691.818726,1707.817802,1691.821334,1439.715632,1844.836172"	"DFSTAILER,DVDIGALAK,LVVDEAINDDNSVVSLHPATMEK"	CDC48A	http://www.uniprot.org/uniprot/P54609	33.621755
90494464	68759808	80347032	77148184	72408848	79174280	75573208	86953456	80129728	82872720	68832304	75092600	sp|P55229|GLGL1_ARATH	P55229	2	24	23	57673.122	"99.7,99.7,99.7,99.0,94.8,99.0,99.7,99.7,99.7,99.7,99.1,99.7,99.7,99.7,99.7,99.0,99.0,99.7,99.0,99.7,99.0,99.7,99.7,99.6"	"AKPAVPIGGAYR,AMAVDTTILGLSK,AMAVDTTILGLSK | Oxidation [M2],ASDFGLMK,ASDFGLMK | Oxidation [M7],IQECIIDK | Carbamidomethyl [C4],LIDVPMSNCINSGINK | Carbamidomethyl [C9],LIDVPMSNCINSGINK | Carbamidomethyl [C9] Oxidation [M6],MDYMDFIQDHR,MDYMDFIQDHR | Oxidation [M1 M4],MDYMDFIQDHR | Oxidation [M1],MDYMDFIQDHR | Oxidation [M4],NVIIANSEGIQEADR,QFHWLFEDAR,QSGADISISCIPIDDR | Carbamidomethyl [C10],SGITVILK…	"sp|P55229|GLGL1_ARATH Glucose-1-phosphate adenylyltransferase large subunit 1, chloroplastic OS=Arabidopsis thaliana GN=ADG2 PE=1 SV=3"	"sp|P55231|GLGL3_ARATH,sp|P55229|GLGL1_ARATH"	"1198.6822515,1318.716756,1334.711106,867.416309,883.409012,1017.5167,1773.8745655,1789.868256,1469.606597,1501.596848,1485.601179,1485.600619,1627.811486,1347.636351,1745.82587433,829.527282,943.439952,1271.71950833,843.481382,1033.5807245,974.492058,1130.592591,1640.8521535,1149.556026"	"VISFSEKPK,AKPAVPIGGAYR,TVASIILGGGAGTR"	ADG2	http://www.uniprot.org/uniprot/P55229	36.206897
32764332	38676304	37305312	38678648	39795808	41987456	35728180	28185152	32885644	38808216	32957804	40579508	sp|Q8LPR9|TI110_ARATH	Q8LPR9	1	24	24	112119.227	"99.7,99.4,98.2,99.7,99.7,99.7,99.3,99.7,99.7,99.7,99.7,99.7,99.0,99.7,99.7,99.7,99.7,99.7,99.7,99.7,99.7,99.7,99.7,99.7"	"AGAIHEEIYR,APEEDPVQEK,EAEAISVDVTSK,EEDDEDEEWGSLESLR,ETAMSIASK,ETAMSIASK | Oxidation [M4],GDEAFQAEICDIYCR | Carbamidomethyl [C10 C14],GVGPISLIGDESDFER,LANAVSSGDLEAQDSK,LCEELHFDAQK | Carbamidomethyl [C2],LQQCVTDGELSDDNVAALLR | Carbamidomethyl [C4],LSDELAEDLFR,LVAMSQLR | Oxidation [M4],MANAIETAVNQGR,MANAIETAVNQGR | Oxidation [M1],MGKPGQTEITLK,NALGIDEPDAAAMHMEIGR,NALGIDEPDAAAMHMEIGR | Oxidation [M13…	"sp|Q8LPR9|TI110_ARATH Protein TIC110, chloroplastic OS=Arabidopsis thaliana GN=TIC110 PE=1 SV=1"	sp|Q8LPR9|TI110_ARATH	"1157.5828245,1140.529484,1247.62188,1936.781128,936.458125,952.4528,1845.771134,1689.821452,1603.768302,1388.6402555,2216.0733905,1306.640596,932.510908,1373.671856,1389.666966,1301.701209,2009.928822,2041.9191875,1512.8134765,1146.5048285,1202.640996,1100.57109,1023.5457465,1520.807586"	"VEQLDELQK,LSDELAEDLFR,QQAEVILADGQLTK"	TIC110	http://www.uniprot.org/uniprot/Q8LPR9	26.082677
104542456	96038152	95860176	111294024	90991384	112422952	105122784	95161592	106697704	104293304	98810264	103725312	sp|Q9SI75|EFGC_ARATH	Q9SI75	1	24	24	86056.503	"99.6,99.7,99.7,99.7,99.7,99.7,99.7,99.7,99.7,99.7,99.7,99.7,99.7,99.7,99.7,99.3,99.6,99.7,99.7,99.7,99.7,99.7,99.7,99.7"	"AIVWSGEELGAK,ASYTMQLAK,ASYTMQLAK | Oxidation [M5],DTITGETLSDPENPVVLER,FDVVPQHIQNQLSSK,FEPLEAGSGYEFK,FVPILCGSAFK | Carbamidomethyl [C6],GITITSAATTTFWDK,GQINSFGDKPGGLK,IGEVHEGTATMDWMEQEQER | Oxidation [M11 M14],IGEVHEGTATMDWMEQEQER | Oxidation [M11],IGEVHEGTATMDWMEQEQER | Oxidation [M14],ISAGSYVLNANK,KPDDDEPFAGLAFK,LAQEDPSFHFSR,MDFPDPVIK,MDFPDPVIK | Oxidation [M1],NIGIMAHIDAGK,NIGIMAHIDAGK | Oxida…	"sp|Q9SI75|EFGC_ARATH Elongation factor G, chloroplastic OS=Arabidopsis thaliana GN=CPEFG PE=1 SV=1"	sp|Q9SI75|EFGC_ARATH	"1258.655264,1011.505826,1027.500844,2084.029289,1738.90106,1472.682014,1237.653,1611.81508333,1416.732069,2407.004313,2391.010647,2391.011097,1235.649854,1548.7459145,1432.674312,1060.52656,1076.52138,1238.6446215,1254.638307,1462.715496,1572.836664,1415.716424,2177.095629,2166.143236"	"LAQEDPSFHFSR,QSGGQGQFADITVR,GQINSFGDKPGGLK"	CPEFG	http://www.uniprot.org/uniprot/Q9SI75	32.439336
33792552	25592700	27794368	33229232	23563520	32656296	27355320	23264508	27349652	34503568	29043044	29376620	tr|Q93VS8|Q93VS8_ARATH	Q93VS8	1	24	24	123824.212	"98.8,99.7,99.0,99.7,99.0,99.7,99.0,99.7,99.0,99.7,99.7,99.7,99.7,96.5,99.7,99.7,99.4,99.7,98.1,99.7,99.6,99.7,99.7,99.7"	"AAVSAMPELMR | Oxidation [M6 M10],AHAEDFDAEEGELIK,AMAAVLLR,ATACNMLCCYADELK | Carbamidomethyl [C4 C8 C9],DDAYLWPR,DVVTQETAGR,FYFHEEVR,IAICIFDDVAEQCR | Carbamidomethyl [C4 C13],KLPQFIDR,LAHLLQLSPHPEGR,LLVLLQNGK,LNVVIQLPNAR,LSLSTQSSLK,QDVDLLGPNNQHLPK,QSENAMAYDNAVSAVGK,QSENAMAYDNAVSAVGK | Oxidation [M6],QSNPDTLSLK,SMECISLVGMAVGK | Carbamidomethyl [C4],SMECISLVGMAVGK | Carbamidomethyl [C4] Oxidation […	tr|Q93VS8|Q93VS8_ARATH Protein EMBRYO DEFECTIVE 2734 OS=Arabidopsis thaliana GN=emb2734 PE=2 SV=1	tr|Q93VS8|Q93VS8_ARATH	"1206.57491,1672.757156,843.49988,1818.739148,1034.481802,1074.529918,1125.524409,1708.79258,1015.581624,1566.862712,996.633156,1235.734076,1062.591892,1686.867076,1753.793166,1769.789446,1101.566086,1480.707884,1512.69497,1165.59753,1005.51631,1743.862264,1471.690425,1291.614996"	"QSNPDTLSLK,SSAESLFNLAK,LSLSTQSSLK"	emb2734	http://www.uniprot.org/uniprot/Q93VS8	22.849462
10531911	8.20839e+06	8918715	9773341	8311615	10676542	7458573	6.68159e+06	7.46839e+06	5.51568e+06	7851844	6390611	sp|F4K0E8|ISPG_ARATH	F4K0E8	2	23	3	82255.54	"99.7,99.7,99.6,99.7,99.0,99.7,98.8,99.7,99.7,99.7,99.7,99.7,99.7,99.7,96.5,99.7,99.6,99.0,99.7,99.7,99.7,99.7,97.4"	"AQFETIDYTEDEYQK,ASNPVIMVQAYR | Oxidation [M7],DITGTVDEVMR,DITGTVDEVMR | Oxidation [M10],EGEEVDYR,ELQHIEQVFTPLVEK,GDEPYEELEILK,GMVESAFEFAR,IGTNHGSLSDR,IMSYYGDSPR,IMSYYGDSPR | Oxidation [M2],IQTMTTSDTK,LDYHNFVFSMK,LQQGVAPFEEK,LVVGMPFK,NTSFNLLQGCR | Carbamidomethyl [C10],TEYVSCPSCGR | Carbamidomethyl [C6 C9],TGDLPVQK,TVMVGNVALGSEHPIR,TVMVGNVALGSEHPIR | Oxidation [M3],VNPGNFADR,VSLTEPPEEEIDPCR | Car…	"sp|F4K0E8|ISPG_ARATH 4-hydroxy-3-methylbut-2-en-1-yl diphosphate synthase (ferredoxin), chloroplastic OS=Arabidopsis thaliana GN=ISPG PE=1 SV=1"	"sp|F4K0E8|ISPG_ARATH,tr|B3H725|B3H725_ARATH"	"1878.816805,1363.691418,1234.585916,1250.58061,995.419536,1808.966875,1433.692548,1242.570044,1155.561939,1187.528348,1203.522583,1124.539174,1399.66047,1244.639644,889.50963,1308.624012,1314.532706,856.465204,1678.88268,1694.877844,988.472222,1769.81366,1026.466826"	"DITGTVDEVMR,WVDPPVADE,LDYHNFVFSMK"	ISPG	http://www.uniprot.org/uniprot/F4K0E8	30.22942
1186272768	1282903936	1200850048	1327778176	1180908160	1208966528	1278586880	1051937728	1277251584	1187221504	1300822784	1320458624	sp|P0DH99|EF1A1_ARATH	P0DH99	4	23	0	49501.728	"99.0,99.7,99.7,99.2,99.7,99.7,99.0,99.7,99.7,99.7,99.7,99.7,99.7,99.0,99.7,99.0,99.7,99.6,99.7,99.7,99.7,99.7,99.7"	"ARYDEIIK,EHALLAFTLGVK,GAANFTSQVIIMNHPGQIGNGYAPVLDCHTSHIAVK | Carbamidomethyl [C28],GAANFTSQVIIMNHPGQIGNGYAPVLDCHTSHIAVK | Carbamidomethyl [C28] Oxidation [M12],GYVASNSKDDPAK,IGGIGTVPVGR,LPLQDVYK,MTPTKPMVVETFSEYPPLGR,MTPTKPMVVETFSEYPPLGR | Oxidation [M1 M7],MTPTKPMVVETFSEYPPLGR | Oxidation [M1],MTPTKPMVVETFSEYPPLGR | Oxidation [M7],NMITGTSQADCAVLIIDSTTGGFEAGISK | Carbamidomethyl [C11],NMITGTSQADC…	sp|P0DH99|EF1A1_ARATH Elongation factor 1-alpha 1 OS=Arabidopsis thaliana GN=A1 PE=1 SV=1	"sp|Q8GTY0|EF1A4_ARATH,sp|Q8W4H7|EF1A2_ARATH,sp|Q0WL56|EF1A3_ARATH,sp|P0DH99|EF1A1_ARATH"	"1006.5443945,1297.738556,3816.88533933,3832.875472,1350.6401055,1024.603178,974.54419,2279.135176,2311.12319733,2295.1266735,2295.129255,2956.410048,2972.40372,1112.42282,913.55952,1025.482353,1119.5931175,2521.22439,2505.325395,2521.31825267,2537.3120585,2521.315812,1450.665902"	"LPLQDVYK,IGGIGTVPVGR,STNLDWYK"	A1	http://www.uniprot.org/uniprot/P0DH99	51.447661
148640128	115184128	118975232	145036096	124815760	131199784	132065736	111167152	152287008	114518512	149432704	133959600	sp|P17094|RL31_ARATH	P17094	2	23	16	44558.589	"99.0,99.7,99.7,99.7,99.7,99.7,99.7,99.7,99.7,99.7,97.5,99.0,99.0,99.0,99.7,99.7,99.4,99.7,99.7,99.2,99.7,99.7,99.0"	"AGMTHIVR,AHMMEIQINGGTIAQK,AHMMEIQINGGTIAQK | Oxidation [M3 M4],AHMMEIQINGGTIAQK | Oxidation [M3],AHMMEIQINGGTIAQK | Oxidation [M4],DEMIDIIGVTK,DEMIDIIGVTK | Oxidation [M3],DVTPMGGFPHYGIVK,DVTPMGGFPHYGIVK | Oxidation [M5],FIDTASIFGHGR,FTAFMGYK,FTAFMGYK | Oxidation [M5],GIQAQLEK,GYEGVVTR,HGSLGFLPR,QIPIEAVFQK,QSLLTQTSR,SLNTVWAQHLSEEVR,VACIGAWHPAR | Carbamidomethyl [C3],VDFAYSFFEK,VGTEAHTAMTEYDR,VGT…	sp|P17094|RL31_ARATH 60S ribosomal protein L3-1 OS=Arabidopsis thaliana GN=ARP1 PE=2 SV=5	"sp|P17094|RL31_ARATH,sp|P22738|RL32_ARATH"	"883.469826,1740.86462,1772.8540155,1756.859469,1756.859884,1232.631574,1248.623924,1616.8016705,1632.7976285,1319.663004,963.452976,979.447358,885.491334,879.44475,982.5348535,1171.660004,1032.556376,1767.8898395,1236.618171,1251.582216,1579.6934055,1595.68836733,936.5502835"	"GIQAQLEK,FIDTASIFGHGR,QSLLTQTSR"	ARP1	http://www.uniprot.org/uniprot/P17094	44.215938
191698528	199770128	200158416	194447312	158658480	192127584	205897968	130015392	210168976	165246352	212253056	202122192	sp|P25696|ENO2_ARATH	P25696	1	23	23	47718.727	"99.7,99.7,99.7,99.7,98.3,99.7,99.7,99.7,99.7,99.7,99.7,99.5,99.7,99.7,99.7,99.7,99.0,99.7,99.7,99.7,99.7,99.7,99.7"	"AGAVVSGIPLYK,AGWGVMTSHR,AGWGVMTSHR | Oxidation [M6],AVGNVNNIIGPALIGK,AVGNVNNIIGPALIGK | Deamidated [N6],DGGSDYLGK,GNPTVEVDIHTSNGIK | Deamidated [N13],HIANLAGNPK,IEEELGSEAIYAGVNFR,IVLPVPAFNVINGGSHAGNK,KYGQDATNVGDEGGFAPNIQENK,LAMQEFMILPVGAASFK,MGVEVYHHLK,MGVEVYHHLK | Oxidation [M1],MTTECGTEVQIVGDDLLVTNPK | Carbamidomethyl [C5],MTTECGTEVQIVGDDLLVTNPK | Carbamidomethyl [C5] Oxidation [M1],SCNALLLK |…	sp|P25696|ENO2_ARATH Bifunctional enolase 2/transcriptional activator OS=Arabidopsis thaliana GN=ENO2 PE=1 SV=1	sp|P25696|ENO2_ARATH	"1173.675464,1100.519255,1116.513204,1548.898533,1549.87784,910.4036375,1680.832424,1033.56684,1895.92721633,2003.096727,2451.130563,1851.964462,1211.611963,1227.607116,2419.16033667,2435.15790333,917.500168,1899.859044,1572.835636,2004.051798,1858.870576,1874.861232,2323.03739125"	"AGAVVSGIPLYK,VNQIGSVTESIEAVK,AVGNVNNIIGPALIGK"	ENO2	http://www.uniprot.org/uniprot/P25696	58.108108
1806585600	1906480896	2216229632	1859088000	1902186624	2008309248	2239992064	2013391360	2116141952	2241954560	2200385280	2387082240	sp|P56757|ATPA_ARATH	P56757	1	23	23	55327.587	"99.7,99.7,99.0,99.7,99.7,99.7,97.6,99.7,99.7,99.7,99.7,99.7,96.6,99.7,99.7,99.7,99.7,99.7,99.7,99.7,99.0,99.7,98.0"	"ADEISNIIR,ASSVAQVVTSLQER,ATQNQLAR,EAYPGDVFYLHSR,EGIQEQLER,EQHTLIIYDDLSK,ERIEQYNR,EVTIVNTGTVLQVGDGIAR,IAQIPVSEAYLGR,IAQIPVSEAYLGR | Deamidated [Q3],LELAQFAELEAFSQFSSDLDK,LIESPAPGIISR,QSQSAPLTVEEQIMTIYTGTNGYLDGLEIGQVR | Deamidated [N21],QSQSAPLTVEEQIMTIYTGTNGYLDGLEIGQVR | Deamidated [Q3 Q12],SVYEPLQTGLIAIDSMIPIGR,SVYEPLQTGLIAIDSMIPIGR | Oxidation [M16],TAVATDTILNQQGQNVICVYVAIGQK | Carbamidomethyl …	"sp|P56757|ATPA_ARATH ATP synthase subunit alpha, chloroplastic OS=Arabidopsis thaliana GN=atpA PE=1 SV=1"	sp|P56757|ATPA_ARATH	"1029.546166,1473.77815,900.476506,1552.73002633,1100.545844,1573.79894233,1106.546332,1941.05280075,1415.7782955,1416.760766,2387.15139233,1251.71852,3611.778708,3612.776208,2272.2179345,2288.209982,2803.450029,1208.629647,1603.8573205,1604.840628,772.443356,1251.6922924,1252.673364"	"VINALANPIDGR,ADEISNIIR,IAQIPVSEAYLGR"	atpA	http://www.uniprot.org/uniprot/P56757	52.071006
16995608	15149839	17978940	17805324	16931976	15537379	8919695	8062044	9598963	8525082	13331771	11355307	sp|P56785|TI214_ARATH	P56785	1	23	23	213725.071	"99.7,99.7,99.7,99.3,99.7,98.8,99.7,99.0,99.0,97.0,99.7,99.7,99.7,99.7,99.7,99.7,98.1,97.2,97.7,99.7,99.7,99.7,99.0"	"CTYNGVQLSETEFPR | Carbamidomethyl [C1],DNQNSDQNDEMALIR | Oxidation [M11],ENSNLEFFK,ESAGQVELESDK,ESAGQVELESDKETK,EWSVENILEK,FFEADSLLNPK,GILIIEPVR,IDEMEEIR,IPSPIFTK,KPSFFEPISK,LNNPNEIAVSSIER,LSFFSEPQQEEK,NEMSQYFFYTCQSDGK | Carbamidomethyl [C11] Oxidation [M3],NIEENFAESTIK,NIQNLTTVLHK,NLIPLFGPR,NTLYFISTIK,NWLTDGIQIK,SQYQYNLPQISWAR,TVSENLYGNK,VMDEGEEGTEK,YSQQSDFR"	sp|P56785|TI214_ARATH Protein TIC 214 OS=Arabidopsis thaliana GN=TIC214 PE=1 SV=1	sp|P56785|TI214_ARATH	"1799.815242,1777.753226,1126.529768,1290.594398,1648.778286,1245.624382,1279.644134,1008.633478,1033.475034,901.527362,1178.6336755,1554.799572,1467.68715,2019.796558,1393.670988,1279.724889,1025.602984,1198.658532,1186.634064,1752.855796,1123.550216,1222.50104,1029.451666"	"ENSNLEFFK,NWLTDGIQIK,TVSENLYGNK"	TIC214	http://www.uniprot.org/uniprot/P56785	13.829787
16416066	17732540	17263508	18708712	14983931	19763984	20931812	14732272	18902900	15791120	17218260	19375452	sp|P57751|UGPA1_ARATH	P57751	2	23	11	51918.981	"99.7,99.6,99.7,97.9,99.7,99.7,99.7,99.0,99.7,99.7,99.0,99.2,99.6,99.7,99.7,99.2,99.7,99.7,99.7,99.7,99.7,99.4,99.7"	"FFDNAIGVNVPR,GGTLISYEGK,IQTPTDEIVVPYDK,LDAFLSQGK,LEIPDNAVLENK,LNGGLGTTMGCTGPK | Carbamidomethyl [C11],LNGGLGTTMGCTGPK | Carbamidomethyl [C11] Oxidation [M9],LVEADALK,MANVSEDASETK,MANVSEDASETK | Oxidation [M1],MEIIPNPK,NEYCMEVTPK | Carbamidomethyl [C4],NEYCMEVTPK | Carbamidomethyl [C4] Oxidation [M5],SAVDGLTEMSENEK,SAVDGLTEMSENEK | Oxidation [M9],SGFINLVSR,SIPSIVELDSLK,SNVDIHTFNQSK,TNPTNPAIELGPEF…	sp|P57751|UGPA1_ARATH UTP--glucose-1-phosphate uridylyltransferase 1 OS=Arabidopsis thaliana GN=At5g17310 PE=2 SV=1	"sp|P57751|UGPA1_ARATH,sp|Q9M9P3|UGPA2_ARATH"	"1347.693453,1023.5240685,1616.83033,977.518464,1353.712686,1462.69012,1478.6864,857.485758,1280.555322,1296.548918,940.505868,1269.536546,1285.531164,1508.669118,1524.661737,991.544924,1299.72796,1388.66889,1626.825056,1311.750653,1957.955037,1372.702672,1546.74278"	"TNPTNPAIELGPEFK,SGFINLVSR,LEIPDNAVLENK"	At5g17310	http://www.uniprot.org/uniprot/P57751	48.297872
47442616	51112376	50638212	50139704	44122756	49181052	46594732	47709792	44629016	46684232	49928864	47576336	sp|Q42601|CARB_ARATH	Q42601	1	23	23	129955.913	"99.7,99.0,98.9,99.5,99.4,99.0,99.7,99.6,99.7,99.4,99.7,99.7,99.7,99.7,99.7,99.7,99.7,99.7,92.4,99.7,99.7,99.7,99.2"	"AMEIVYDDSR,ATGFPIAK,DYSIAIIR,EEGYEVILINSNPATIMTDPETANR | Oxidation [M17],EVGYPVVVRPSYVLGGR,EYELEVMR,FNAILDELK,FQGCDVILGPEMR | Carbamidomethyl [C4],FQGCDVILGPEMR | Carbamidomethyl [C4] Oxidation [M12],IDEIYELSMVDK,ISLGVVPSYK,IVATSGTAHFLELK,IWGTSPDSIDAAEDR,LITYLENAVQVDPERPVLVDK,LSVGYTLDQIPNDITR,SEADALAIAK,SLECGFSGWGCAK | Carbamidomethyl [C4 C11],SVGESMALGR,TFQESFQK,TPASFEPSIDYVVTK,TPPSGIGTTLDECFDI…	"sp|Q42601|CARB_ARATH Carbamoyl-phosphate synthase large chain, chloroplastic OS=Arabidopsis thaliana GN=CARB PE=1 SV=1"	sp|Q42601|CARB_ARATH	"1197.534028,803.454532,949.52372,2792.313876,1846.010016,1067.496548,1061.575704,1520.708144,1536.705586,1453.69744,1061.612188,1485.818694,1631.74281,2410.310118,1803.934909,987.523636,1457.60553,1005.49117,1013.482258,1652.828912,2049.956858,994.592314,954.483214"	"IDEIYELSMVDK,VLILGGGPNR,ISLGVVPSYK"	CARB	http://www.uniprot.org/uniprot/Q42601	23.58888
71367576	68066344	68428200	80944704	76704472	78194088	68033264	52833924	62805704	55337472	74509248	67956088	sp|Q8S9L5|TIG_ARATH	Q8S9L5	1	23	23	61732.814	"99.0,99.0,99.7,99.7,99.7,99.7,99.7,99.7,99.0,99.7,99.7,99.7,99.7,99.0,99.7,99.7,99.7,99.7,99.7,99.7,99.7,99.0,97.9"	"AEIQYITR,ATVESILK,AVNEFLETQR,CQEMEQEAK | Carbamidomethyl [C1],DLPTLDDSLADK,DSIQIVSSFPDMEK,ENLEFSTDELVK,EQATDNAILEQIR,EVEETLAK,EVENSISEFK,EVENSISEFKK,GFHFDTEEGNR,HKQEFDEER,LLPGCTTLK | Carbamidomethyl [C5],LNEDQLASLSSQK,LSVEVPEIVCEDCYQR | Carbamidomethyl [C10 C13],QNIAVGDIFK,TLPHAMESVTGR,VKDQVQEILEGAK,VPENIIVGFVGR,VTETVQANSSVK,VVVELGDEIDAK,WNPEDGYK"	"sp|Q8S9L5|TIG_ARATH Trigger factor-like protein TIG, Chloroplastic OS=Arabidopsis thaliana GN=TIG PE=1 SV=1"	sp|Q8S9L5|TIG_ARATH	"992.52933,859.502736,1205.603262,1151.456812,1301.634784,1594.7543685,1422.686776,1499.75659,917.470754,1180.561172,1308.656964,1307.552875,1216.544637,1001.557934,1431.719686,1994.91233133,1103.597536,1297.644558,1455.7929445,1298.734184,1261.651214,1285.677588,1007.434332"	"LLPGCTTLK | Carbamidomethyl [C5],AVNEFLETQR,VPENIIVGFVGR"	TIG	http://www.uniprot.org/uniprot/Q8S9L5	44.241316
202666560	179960544	164238928	155378224	145564736	143386112	209968752	196897664	182000400	239350448	193953712	183824800	sp|Q9FX54|G3PC2_ARATH	Q9FX54	2	23	3	36912.822	"99.7,99.0,99.7,99.0,99.7,99.7,99.7,99.7,99.0,99.0,99.4,99.7,99.7,99.7,99.7,99.0,99.0,99.0,99.7,99.7,99.7,99.0,99.7"	"AASFNIIPSSTGAAK,AATYDEIK,AATYDEIKK,AGIALSDK,DAPMFVVGVNEHEYK,DAPMFVVGVNEHEYK | Oxidation [M4],FGIVEGLMTTVHSITATQK | Oxidation [M8],GILGYTEDDVVSTDFVGDNR,IGINGFGR,IGINGFGR | Deamidated [N4],KVVISAPSK,LVSWYDNEWGYSSR,NPEDIPWGEAGADFVVESTGVFTDK,SDLDIVSNASCTTNCLAPLAK | Carbamidomethyl [C11 C15],TLLFGEKPVTVFGIR,TVDGPSMK,VLPSLNGK,VLPSLNGK | Deamidated [N6],VPTVDVSVVDLTVR,VVDLIVHMSK,VVDLIVHMSK | Oxidation …	"sp|Q9FX54|G3PC2_ARATH Glyceraldehyde-3-phosphate dehydrogenase GAPC2, cytosolic OS=Arabidopsis thaliana GN=GAPC2 PE=1 SV=1"	"sp|P25858|G3PC1_ARATH,sp|Q9FX54|G3PC2_ARATH"	"1433.751285,909.443874,1037.5395345,773.428052,1733.81202925,1749.803607,2048.061414,2171.0013594,832.455392,833.439445667,927.575562,1760.778803,2679.223794,2249.0679035,1675.9672165,833.395292,826.491366,827.475116667,1497.84035175,1139.637127,1155.634432,799.4802785,1118.5142165"	"VLPSLNGK,VLPSLNGK | Deamidated [N6],NPEDIPWGEAGADFVVESTGVFTDK"	GAPC2	http://www.uniprot.org/uniprot/Q9FX54	67.159763
4231873	4.66122e+06	4.53559e+06	4.48434e+06	4.5168e+06	4.26752e+06	4791080	4196454	4729277	3.04856e+06	4211349	4225445	sp|Q9LQ55|DRP2B_ARATH	Q9LQ55	2	23	11	100226.975	"99.7,99.7,99.3,96.6,98.8,99.7,99.0,98.9,99.7,99.7,99.7,99.7,96.6,97.3,99.7,99.5,99.7,99.7,99.7,99.7,99.7,99.7,99.7"	"AAAASSWSDNSGTESSPR,AFVPPQHFIR,AIILQIDNK,ATSPQPDGPSSTGGSLK,AVVLCQVEK | Carbamidomethyl [C5],EVVAIASAALDGFKNEAK,EYDPESTR,GGQVGSASMR,IALVDTLASQIR,IDQAAENPK,IESLIQEDQNVK,IVLEADGYQPYLISPEK,KPVDPEEELR,NQQVSASALR,QAASLLADEDPDETSSSR,QSLSEGSLDK,RPATSLNVVALGNVGAGK,SAVLNSLIGHPVLPTGENGATR,SLAAVQALLSNQGPPK,SQIVQDELAR,TAGPEGEITAGYLMK | Oxidation [M14],VLVDIVSASANATPGLGR,YSDPAQNGEDSSGSGGSSR"	sp|Q9LQ55|DRP2B_ARATH Dynamin-2B OS=Arabidopsis thaliana GN=DRP2B PE=1 SV=2	"sp|Q9SE83|DRP2A_ARATH,sp|Q9LQ55|DRP2B_ARATH"	"1779.765832,1210.660998,1026.607392,1585.758018,1044.564404,1831.966572,995.419086,948.444724,1298.7557525,984.485114,1414.72972,1934.005656,1210.618528,1072.562566,1890.843292,1062.520106,1722.972963,2202.174426,1592.887464,1157.60394,1552.745118,1738.956754,1856.740558"	"NQQVSASALR,RPATSLNVVALGNVGAGK,SLAAVQALLSNQGPPK"	DRP2B	http://www.uniprot.org/uniprot/Q9LQ55	34.23913
914743296	921333120	945938304	975002624	874623296	954545920	876032320	913782464	904828544	854130176	977258752	998975232	sp|Q9SJU4|ALFC1_ARATH	Q9SJU4	4	23	10	42930.433	"98.7,99.0,99.0,99.7,99.7,99.0,99.7,99.7,99.7,99.7,99.7,99.7,99.7,92.5,99.7,99.7,99.7,99.7,99.7,99.7,99.7,99.7,99.7"	"AAQDILLAR,AASAYADELVK,ALQNTCLK | Carbamidomethyl [C6],ANSLAQLGK,ATPEQVASYTLK,EAAWGLAR,GLVPLVGSYDESWCQGLDGLASR | Carbamidomethyl [C14],KMVDVLVEQNIVPGIK,KMVDVLVEQNIVPGIK | Oxidation [M2],LASIGLENTEANR,MVDVLVEQNIVPGIK,MVDVLVEQNIVPGIK | Oxidation [M1],TAAYYQQGAR,TAAYYQQGAR | Deamidated [Q6],TIASPGHGIMAMDESNATCGK | Carbamidomethyl [C19],TIASPGHGIMAMDESNATCGK | Carbamidomethyl [C19] Deamidated [N16],T…	"sp|Q9SJU4|ALFC1_ARATH Probable fructose-bisphosphate aldolase 1, chloroplastic OS=Arabidopsis thaliana GN=FBA1 PE=1 SV=2"	"sp|Q9ZU52|ALFC3_ARATH,tr|Q9SJQ9|Q9SJQ9_ARATH,sp|Q9SJU4|ALFC1_ARATH,sp|Q944G9|ALFC2_ARATH"	"969.557256,1136.570198,946.491314,900.503486,1306.6773985,872.451364,2478.188094,1781.0115355,1797.006934,1386.712056,1652.917946,1668.912146,1127.535925,1128.517938,2146.9435395,2147.923302,2178.9358174,2162.939346,2162.938807,1451.8346035,1452.81758675,1146.566378,1198.497512"	"AAQDILLAR,ATPEQVASYTLK,LASIGLENTEANR"	FBA1	http://www.uniprot.org/uniprot/Q9SJU4	44.110276
87078824	94632440	99600680	100974256	90526896	110820664	117429512	114940528	110197176	108542672	79725208	110728056	sp|Q9SRZ6|ICDHC_ARATH	Q9SRZ6	2	23	19	45745.68	"99.7,99.7,99.7,99.7,98.9,99.7,99.7,99.0,99.7,99.7,98.9,99.7,99.7,99.7,99.7,99.7,99.7,99.7,99.6,99.7,96.2,99.7,99.7"	"AFADASMNTAYEK,AFADASMNTAYEK | Oxidation [M7],DLALIIHGSK,DTYLNTEEFIDAVAAELK,HAFGDQYR,KWPLYLSTK,LIDDMVAYALK | Oxidation [M5],LTMTFEGK,LVPGWTKPICIGR | Carbamidomethyl [C10],NILNGTVFR,NILNGTVFR | Deamidated [N4],SEGGYVWACK | Carbamidomethyl [C9],SKYDAAGIWYEHR,TIEAEAAHGTVTR,VANPIVEMDGDEMTR,VANPIVEMDGDEMTR | Oxidation [M13],VANPIVEMDGDEMTR | Oxidation [M8 M13],VANPIVEMDGDEMTR | Oxidation [M8],VTIESAEA…	sp|Q9SRZ6|ICDHC_ARATH Cytosolic isocitrate dehydrogenase [NADP] OS=Arabidopsis thaliana GN=CICDH PE=2 SV=1	"sp|Q8LPJ5|ICDHP_ARATH,sp|Q9SRZ6|ICDHC_ARATH"	"1417.618004,1433.612002,1065.618609,2040.99024,992.446326,1134.6436605,1266.652334,925.4581325,1495.8328545,1032.57173,1033.55557,1155.501576,1594.752565,1354.68347567,1675.75344,1691.7493165,1707.744367,1691.749836,1047.544682,1175.640734,1006.549416,1379.625405,1116.571413"	"NILNGTVFR,LTMTFEGK,VTIESAEATK"	CICDH	http://www.uniprot.org/uniprot/Q9SRZ6	41.463415
21451620	29770472	25481384	25267088	18828508	28517688	27517552	24148908	25076332	27634136	21274432	24931852	tr|F4IWV2|F4IWV2_ARATH	F4IWV2	2	23	18	115162.064	"99.7,99.2,97.9,99.7,99.7,99.7,99.7,99.0,99.7,98.5,99.5,99.7,99.7,99.0,99.7,99.7,99.7,99.7,99.7,99.2,99.7,99.5,99.7"	"AADLGVESIVIGMSHR,AISSLPENFKPHR,AQSAPVPR,DQNDHSDLEEGIR,FGHNEIDEPSFTQPK,FGLEGGESLIPGMK | Oxidation [M13],GPSAATATGFYTFHVK,IETPTPWR,IHLSLVANPSHLEAADSVVVGK,KPLIVMAPK | Oxidation [M6],LDPLGLEQR,LLECGEVSQQDIDR | Carbamidomethyl [C4],LNVLGNVVR,LSGQDVER,NFVGQAATSPGISGQTIQESMR,NHPSTLQIYHK,NTGVKPEILK,QIFSEFSGGIRPVDEVGYTGTGDVK,QTGLVMLLPHGYDGQGPEHSSAR,QYYSNDLDR,SNLSEFDDVQGHPGFDK,VGATDVAICR | Carbamidomethyl…	"tr|F4IWV2|F4IWV2_ARATH 2-oxoglutarate dehydrogenase, E1 component OS=Arabidopsis thaliana GN=At3g55410 PE=4 SV=1"	"tr|F4IWV2|F4IWV2_ARATH,tr|Q9FLH2|Q9FLH2_ARATH"	"1653.85149,1494.794373,824.449456,1526.659567,1744.806371,1449.715669,1653.8155345,998.51878,2255.22644,1011.615302,1039.566334,1660.772922,982.592836,902.444688,2278.101446,1336.688385,1097.64465,2657.297577,2449.180137,1172.510294,1890.83862233,1060.530026,1462.765122"	"VNTILNEEFVASK,LDPLGLEQR,SNLSEFDDVQGHPGFDK"	At3g55410	http://www.uniprot.org/uniprot/F4IWV2	30.875123
181900720	165946496	163456400	173177504	165559872	207235888	162670496	178979776	162718928	210282256	168532160	168307504	sp|O80860|FTSH2_ARATH	O80860	2	22	11	74156.557	"99.7,99.7,99.0,99.3,99.7,99.7,99.7,99.7,99.7,99.0,99.7,99.7,99.7,99.7,99.0,99.7,99.7,99.7,99.7,99.7,93.1,99.7"	"ADILDSALLRPGR,AILSEFTEIPPENR,EIDDSIDR,ETIGGDEFR,FQMEPNTGVTFDDVAGVDEAK,FQMEPNTGVTFDDVAGVDEAK | Oxidation [M3],GTGIGGGNDER,GVLLIGPPGTGK,IVAGMEGTVMTDGK | Oxidation [M5 M10],IVGGLGGR,KFDNDVSLEIIAMR,LAEDIDSAVK,LAEDIDSAVKK,LSDSAYEIALSHIK,LVEVLLEK,QVSVDVPDVK,SGGGMGGPGGPGNPLQFGQSK,SGGGMGGPGGPGNPLQFGQSK | Oxidation [M5],SLVAYHEVGHAVCGTLTPGHDAVQK | Carbamidomethyl [C13],TPGFSGADLANLLNEAAILAGR,VPSSTTTTPASA…	"sp|O80860|FTSH2_ARATH ATP-dependent zinc metalloprotease FTSH 2, chloroplastic OS=Arabidopsis thaliana GN=FTSH2 PE=1 SV=1"	"sp|O80860|FTSH2_ARATH,sp|Q8W585|FTSH8_ARATH"	"1395.783261,1614.82764,961.434994,1022.467654,2269.020954,2285.015885,1031.461574,1107.6656865,1439.663234,727.433414,1649.845695,1059.545298,1187.6392685,1545.80455,941.58025,1084.57625,1885.874282,1901.868714,2645.302561,2170.137381,1654.841262,1451.8352095"	"GVLLIGPPGTGK,ETIGGDEFR,LAEDIDSAVK"	FTSH2	http://www.uniprot.org/uniprot/O80860	38.273381
375754752	445756000	437169952	435292576	394372864	456956864	379875936	344947520	392690976	390518144	415915904	406624672	sp|P17745|EFTU_ARATH	P17745	2	22	21	51629.557	"99.7,99.7,99.7,99.7,99.7,99.7,99.7,99.7,99.7,99.7,99.7,99.7,99.7,99.7,99.7,99.7,99.7,99.7,99.7,99.7,99.7,99.7"	"ELLSSYEFNGDDIPIISGSALLAVETLTENPK | Deamidated [N9],GITINTATVEYETENR,HYAHVDCPGHADYVK | Carbamidomethyl [C7],ILDEALAGDNVGLLLR,IMNDKDEESK,IVVELIVPVACEQGMR | Carbamidomethyl [C11] Oxidation [M15],KKPHVNIGTIGHVDHGK,KPHVNIGTIGHVDHGK,KYDEIDAAPEER,NMITGAAQMDGAILVVSGADGPMPQTK | Oxidation [M2 M9 M23],NMITGAAQMDGAILVVSGADGPMPQTK | Oxidation [M2 M9],NMITGAAQMDGAILVVSGADGPMPQTK | Oxidation [M9 M23],NMITGAAQM…	"sp|P17745|EFTU_ARATH Elongation factor Tu, chloroplastic OS=Arabidopsis thaliana GN=TUFA PE=1 SV=1"	"sp|Q9ZT91|EFTM_ARATH,sp|P17745|EFTU_ARATH"	"3435.738528,1809.87681867,1767.77833733,1680.939263,1207.535865,1827.959026,1836.012064,1707.91649825,1434.6627645,2720.280303,2704.294569,2704.285272,2688.291822,2134.134325,1444.774548,1460.769176,1388.66404,1404.65884,1906.043178,1922.040234,1156.645585,1306.56729"	"VGETVDLVGLR,SYTVTGVEMFQK,YDEIDAAPEER"	TUFA	http://www.uniprot.org/uniprot/P17745	49.579832
80488776	84678848	86873288	89480496	73576272	86743944	91272392	87834264	89862224	83619472	93724712	113699472	sp|P29511|TBA6_ARATH	P29511	6	22	2	49537.318	"99.7,99.7,99.7,99.7,99.7,99.7,99.7,99.7,99.5,99.7,99.0,99.7,99.7,99.7,99.7,99.7,99.7,99.7,99.7,99.7,99.3,99.7"	"AFHEQLSVAEITNSAFEPASMMAK | Deamidated [N13] Oxidation [M21 M22],AFHEQLSVAEITNSAFEPASMMAK | Oxidation [M21 M22],AFHEQLSVAEITNSAFEPASMMAK | Oxidation [M22],AFVHWYVGEGMEEGEFSEAR | Oxidation [M11],AVCMISNSTSVAEVFSR | Carbamidomethyl [C3],AVCMISNSTSVAEVFSR | Carbamidomethyl [C3] Oxidation [M4],AVFVDLEPTVIDEVR,CGINYQPPTVVPGGDLAK | Carbamidomethyl [C1],DVNAAVGTIK,EDAANNFAR,EDLAALEK,EIVDLCLDR | Carbamid…	sp|P29511|TBA6_ARATH Tubulin alpha-6 chain OS=Arabidopsis thaliana GN=TUBA6 PE=1 SV=1	"sp|B9DGT7|TBA2_ARATH,sp|Q0WV25|TBA4_ARATH,sp|P11139|TBA1_ARATH,sp|B9DHQ0|TBA5_ARATH,sp|Q56WH1|TBA3_ARATH,sp|P29511|TBA6_ARATH"	"2641.221516,2640.219705,2624.220735,2345.006133,1856.875369,1872.86958,1700.897708,1884.9404915,986.539264,1006.446942,887.459972,1131.558776,1791.9229755,1807.9185185,1395.7504,1689.879402,1690.864041,1976.877434,1266.50157,1298.491634,1282.496518,1282.4967"	"SLNIERPTYTNLNR | Deamidated [N3],SLNIERPTYTNLNR"	TUBA6	http://www.uniprot.org/uniprot/P29511	44.666667
452489024	534124128	453818784	450530016	360830112	417111456	509319968	421810528	451509728	502351200	441444032	444724480	sp|P31167|ADT1_ARATH	P31167	2	22	12	41475.045	"99.7,99.7,99.0,99.7,99.0,99.0,99.7,99.7,99.0,99.7,93.6,99.7,99.7,99.7,99.7,99.5,99.7,99.7,99.0,99.7,99.7,99.5"	"AVAGAGVLSGYDK,DEGFGSLWR,GAGANILR,GFTNFALDFLMGGVSAAVSK | Oxidation [M11],GIGDCFGR | Carbamidomethyl [C5],GNTANVIR,LLIQNQDEMIK,LLIQNQDEMIK | Oxidation [M9],LQLIVFGK,MMMTSGEAVK,MMMTSGEAVK | Oxidation [M1 M2 M3],MMMTSGEAVK | Oxidation [M1 M2],MMMTSGEAVK | Oxidation [M1 M3],MMMTSGEAVK | Oxidation [M1],MMMTSGEAVK | Oxidation [M2 M3],MMMTSGEAVK | Oxidation [M2],MMMTSGEAVK | Oxidation [M3],QFDGLVDVYR,TA…	"sp|P31167|ADT1_ARATH ADP,ATP carrier protein 1, mitochondrial OS=Arabidopsis thaliana GN=AAC1 PE=1 SV=2"	"sp|P31167|ADT1_ARATH,sp|P40941|ADT2_ARATH"	"1206.6247715,1065.488187,770.43981,2047.004463,880.386348,843.45604,1343.711793,1359.705996,916.574564,1083.476248,1131.457164,1115.465764,1115.464778,1099.470992,1115.464754,1099.47088,1099.471066,1210.598152,827.449934,964.497862,1407.71082933,1445.734618"	"LLIQNQDEMIK,GIGDCFGR | Carbamidomethyl [C5],AVAGAGVLSGYDK"	AAC1	http://www.uniprot.org/uniprot/P31167	35.958005
1.25739e+06	1.19537e+06	1.54713e+06	1.38371e+06	1.07404e+06	2.09355e+06	1.43979e+06	978066	1.12974e+06	2.15883e+06	1.02592e+06	1.78016e+06	sp|P42643|14331_ARATH	P42643	16	22	2	29931.235	"99.7,99.7,99.7,98.9,96.1,98.1,99.7,99.7,99.7,99.6,99.4,99.7,99.7,99.7,99.7,99.0,99.0,97.2,99.7,99.7,99.7,99.7"	"AAQDIANSELAPTHPIR,AVDKDELTVEER,DAAEHTLTAYK,DEFVYMAK,DEFVYMAK | Oxidation [M6],DELTVEER,DNLTLWTSDMQDDVADDIK | Deamidated [N2] Oxidation [M10],DNLTLWTSDMQDDVADDIK | Oxidation [M10],DSTLIMQLLR,DSTLIMQLLR | Oxidation [M6],EAAPAAAKPADEQQS,GNDDHVSLIR,IETELSDICDGILK | Carbamidomethyl [C9],KDAAEHTLTAYK,LLDTILVPAAASGDSK,NLLSVAYK,NLLSVAYK | Deamidated [N1],QAFDEAIAELDTLGEESYK,SKIETELSDICDGILK | Carbamidom…	sp|P42643|14331_ARATH 14-3-3-like protein GF14 chi OS=Arabidopsis thaliana GN=GRF1 PE=1 SV=3	"tr|F4JJ94|F4JJ94_ARATH,tr|F4KGV2|F4KGV2_ARATH,tr|F4HWQ5|F4HWQ5_ARATH,tr|F4KGV5|F4KGV5_ARATH,sp|P46077|14334_ARATH,sp|P42644|14333_ARATH,sp|P48349|14336_ARATH,sp|P48347|14310_ARATH,sp|P48348|14338_ARATH,sp|P42645|14335_ARATH,sp|Q96299|14339_ARATH,sp|Q01525|14332_ARATH,tr|F4KHY7|F4KHY7_ARATH,sp|P42643|14331_ARATH,sp|Q96300|14337_ARATH,tr|F4IP53|F4IP53_ARATH"	"1802.9275265,1402.6939695,1218.587949,1001.452623,1017.448044,989.465838,2210.967798,2209.969274,1188.655192,1204.645538,1482.693652,1124.557491,1604.7966825,1346.677401,1569.8608175,906.517796,907.501252,2127.984424,1819.9224485,1333.556902,1365.546338,1349.5513"	"DNLTLWTSDMQDDVADDIK | Oxidation [M10],DNLTLWTSDMQDDVADDIK | Deamidated [N2] Oxidation [M10]"	GRF1	http://www.uniprot.org/uniprot/P42643	64.419476
24561752	30601512	28260460	22695356	27829660	20969244	26972396	20124356	25103712	19978308	25608840	22888632	sp|P93028|UBE11_ARATH	P93028	2	22	19	120249.542	"99.7,99.7,99.7,99.7,98.4,99.7,93.5,99.7,99.7,99.0,99.7,99.7,99.0,99.7,99.0,98.4,99.7,99.3,99.7,99.0,99.6,95.5"	"AVLNPMAAMFGGIVGQEVVK | Oxidation [M6 M9],CLYFQKPLLESGTLGTK | Carbamidomethyl [C1],CNTQSVIPHLTENYGASR | Carbamidomethyl [C1],DMAWTVWDR,EVLQWLEDK,FPVAGSEEDAQK,GGIVTQVK,LFASNVLISGMHGLGAEIAK | Oxidation [M11],LISIATAINTGQGDLK,LLNFKPLR,LQDLNNAVVVSSLTK,LTVTDDDIIEK,MKPIQFEK,NLALMGVSCGSQGK | Carbamidomethyl [C9] Oxidation [M5],NLILAGVK,NYSIPEVDK,QEIDEDLHSR,SEFEGLLEK,STVAASAAAVINPR,SVTLHDER,VIVPDFEPR,YDA…	sp|P93028|UBE11_ARATH Ubiquitin-activating enzyme E1 1 OS=Arabidopsis thaliana GN=UBA1 PE=1 SV=1	"sp|P92974|UBE12_ARATH,sp|P93028|UBE11_ARATH"	"2062.0572525,1954.022271,2045.958738,1178.51857,1158.592344,1276.593106,800.475846,2043.082806,1613.899636,999.622876,1599.882574,1260.644834,1019.547846,1436.675464,826.527724,1063.518472,1240.567494,1050.524242,1326.725348,955.472127,1070.57621,1197.597414"	"VIVPDFEPR,YDAQISVFGAK,LQDLNNAVVVSSLTK"	UBA1	http://www.uniprot.org/uniprot/P93028	24.351852
536538688	566583680	605955904	603097984	548654592	609213568	620298688	705336384	610835904	649211840	508129056	628522240	sp|Q01908|ATPG1_ARATH	Q01908	1	22	22	40910.58	"99.7,95.0,99.7,99.7,99.7,99.7,99.7,99.7,99.0,99.7,99.7,99.7,99.7,99.7,99.7,99.7,99.0,99.7,99.0,99.0,99.7,99.7"	"ALQESLASELAAR,ASSVSPLQASLR,EAQAVADDVFSLFISEEVDK,GEICDINGTCVDAAEDEFFR | Carbamidomethyl [C4 C10],GLCGGFNNFIIK | Carbamidomethyl [C3],GLCGGFNNFIIK | Carbamidomethyl [C3] Deamidated [N7],GLGLEYTVISVGK,ITGEILEIVAGANAQV,KGNSYFLR,MSAMSSASDNASDLK,MSAMSSASDNASDLK | Oxidation [M1 M4],MSAMSSASDNASDLK | Oxidation [M1],MSAMSSASDNASDLKK,MSAMSSASDNASDLKK | Oxidation [M1 M4],MSAMSSASDNASDLKK | Oxidation [M1],M…	"sp|Q01908|ATPG1_ARATH ATP synthase gamma chain 1, chloroplastic OS=Arabidopsis thaliana GN=ATPC1 PE=1 SV=1"	sp|Q01908|ATPG1_ARATH	"1357.7198525,1214.662048,2211.05569033,2316.9655205,1338.675428,1339.658374,1334.745128,1596.87394,983.518652,1513.638135,1545.627354,1529.633268,1641.7330845,1673.722723,1657.72814,1657.7285315,986.5546715,1529.8819605,968.47486,984.469467,1027.60308333,1162.623642"	"YLEAGTLPTAK,ALQESLASELAAR,VALVVVTGDR"	ATPC1	http://www.uniprot.org/uniprot/Q01908	48.525469
4.17254e+06	4207792	4.16372e+06	4332705	4.17863e+06	4.20876e+06	4201469	3.19636e+06	4558050	4.00521e+06	6777048	4.38519e+06	sp|Q8H0T4|UPL2_ARATH	Q8H0T4	3	22	13	403611.625	"99.7,96.9,99.7,99.5,95.8,99.7,99.7,99.7,99.7,99.7,98.8,99.7,96.1,98.2,92.1,99.7,93.7,99.7,99.7,99.7,99.4,95.2"	"ANTEYTSYTVGSPVIR,ASAPVDTVVER,ASDNSVSASSSTAER,AYVLEDSYNQLR,DAVLQVLR,DLGGLDDTIFR,EALDGLDHFQIVGR,EIEGDPLVNADALK,ELSELASGLSSSTVR,ESDEDSSNALAVR,EWYQLLSR,FLQFVTGTSK,FVGPEEWK,IEGWSPSSGVPEK,IFSSPSYLK,IYSLAGEVLK,LEDTEKPVDVPQEEAEPK,LENKPVGEEASSETQK,LFSLAQGWGGK,LYGCQLNVVYGR | Carbamidomethyl [C4],TFLTTMAPVISR | Oxidation [M6],YTNPVSIR"	sp|Q8H0T4|UPL2_ARATH E3 ubiquitin-protein ligase UPL2 OS=Arabidopsis thaliana GN=UPL2 PE=1 SV=3	"tr|F4I1Y3|F4I1Y3_ARATH,sp|Q8GY23|UPL1_ARATH,sp|Q8H0T4|UPL2_ARATH"	"1756.86392,1142.592576,1467.642816,1469.713019,912.539068,1220.604098,1568.794695,1482.758204,1534.787104,1391.615868,1093.55618,1126.60225,990.480222,1371.666362,1040.55495,1091.622382,2051.989947,1744.847406,1162.613718,1440.717142,1351.7161,948.503146"	"ASAPVDTVVER,IFSSPSYLK,IEGWSPSSGVPEK"	UPL2	http://www.uniprot.org/uniprot/Q8H0T4	7.217059
31179024	34750636	34735924	35893108	28563936	30140128	32042296	24132992	37949164	24077116	35012112	34450088	sp|Q8VZF3|CGEP_ARATH	Q8VZF3	1	22	22	106101.588	"99.7,99.7,99.7,99.7,96.4,99.6,99.7,99.7,99.3,99.7,99.7,99.7,99.7,98.4,99.7,99.7,99.7,99.7,99.7,99.7,99.7,99.7"	"ALPPLADLARPEEK,DIVDAPPVPALSFSPHR,DIVYMQSAEPLAGEEPEVLHK,DIVYMQSAEPLAGEEPEVLHK | Oxidation [M5],EITGIPDGGK,ESIMHVLWETDR,EVGVPAVYTSLDPSTDHK,INFVTWSNDGK,KPILLIHGEEDNNPGTLTMQSDR,KPILLIHGEEDNNPGTLTMQSDR | Deamidated [N12],KVEVWTTDGR,LVVLPHESHGYSAR,SSEDVYSDPGSTMLR,SSEDVYSDPGSTMLR | Oxidation [M13],TDAGTYVIAK,TENTQYSLQLWPDR,TENTQYSLQLWPDRK,TLTPFGFQNEDR,TWVISPGSNDVSPR,VQQITNFPHPYPQLASLQK,YCVPNTSDADTSPDQS…	"sp|Q8VZF3|CGEP_ARATH Probable glutamyl endopeptidase, chloroplastic OS=Arabidopsis thaliana GN=GEP PE=2 SV=2"	sp|Q8VZF3|CGEP_ARATH	"1518.840287,1816.947435,2354.144151,2370.140217,985.507728,1514.7168465,1913.935401,1279.618288,2577.285447,2578.290132,1189.608864,1563.816702,1642.71445,1658.709482,1037.539648,1749.8338155,1877.929202,1423.672296,1513.752074,2208.169288,1883.782372,1961.011119"	"ALPPLADLARPEEK,TWVISPGSNDVSPR,VQQITNFPHPYPQLASLQK"	GEP	http://www.uniprot.org/uniprot/Q8VZF3	28.125
21680144	26069872	21322096	20537412	17914704	19764732	22799852	17033892	22764204	17266644	22617736	22315720	sp|Q94AM1|OOPDA_ARATH	Q94AM1	2	22	14	88755.809	"99.7,99.0,99.7,99.7,99.7,99.7,99.7,99.7,99.2,99.7,99.7,99.7,99.7,99.7,99.7,99.7,99.7,99.7,99.6,99.7,99.7,99.7"	"AAIEDVQPEK,DTLMSIAK,EAVLIGIALDDEKR,EPSPEPLLR,ESPDWSSLSEAR,FASVDLELHTK,FSENVLDATK,GGAWMDEVVSR,GGAWMDEVVSR | Oxidation [M5],GREPSPEPLLR,HYETGETLPEEVYK,LGQSKPIYNAFK,LLGYNNYAEVSMAMK | Oxidation [M12 M14],LLGYNNYAEVSMAMK | Oxidation [M12],NQGAAESDSMTHWDTTFWSER,NQGAAESDSMTHWDTTFWSER | Oxidation [M10],NTILALGGGK,QDEGLVAGIR,TQVIPPLPEDR,VMDGLFSLAK | Oxidation [M2],YDINEEELRPYFSLPK,YVPGGPESIYDVDQR"	"sp|Q94AM1|OOPDA_ARATH Organellar oligopeptidase A, chloroplastic/mitochondrial OS=Arabidopsis thaliana GN=OOP PE=1 SV=1"	"sp|Q949P2|COPDA_ARATH,sp|Q94AM1|OOPDA_ARATH"	"1098.55528,877.458088,1540.845219,1036.556264,1362.604436,1258.655358,1122.555636,1205.549562,1221.544261,1249.677489,1693.7824805,1364.745362,1734.793866,1718.801193,2455.0160925,2471.007465,942.550074,1056.556174,1263.680264,1095.564194,2011.988295,1693.79424"	"AAIEDVQPEK,ESPDWSSLSEAR,YVPGGPESIYDVDQR"	OOP	http://www.uniprot.org/uniprot/Q94AM1	27.939317
44880128	41404976	49457912	50583200	41901444	47708100	44229660	26426352	43774176	30675784	52962768	45760752	sp|Q9LD43|ACCA_ARATH	Q9LD43	1	22	22	85305.123	"99.7,99.7,99.7,99.0,99.7,99.7,99.7,99.7,99.7,99.0,99.2,98.4,99.7,99.7,99.7,99.7,99.0,99.0,99.6,99.7,99.7,99.7"	"AASEATSLK,AEVASSGASSFDELPDALK,AGYDDPAIVTGIGTIDGK,ASSEEHLMHPVLIEK,DLYTHLTPIQR,DTAEQIYAANENLQEK,EDDDDDEDSSESGK,ETSTEAEPSSEVLNEMIEK | Oxidation [M16],FEHPWPANPDPNVK,FMELHGDR,FQEAVDRPEIR,GEVEAEMAGVLK,IAEALNTSGLQEK,IAINENMNEFGK,IAINENMNEFGK | Oxidation [M7],IEALEQQIK,LKEEFNTR,LNQEITSK,LTDAPNYESLK,SEELGQGEAIANNLR,SEMVNPSFA,TPGVTEAYQK"	"sp|Q9LD43|ACCA_ARATH Acetyl-coenzyme A carboxylase carboxyl transferase subunit alpha, chloroplastic OS=Arabidopsis thaliana GN=CAC3 PE=1 SV=1"	sp|Q9LD43|ACCA_ARATH	"876.454772,1892.90202033,1761.879436,1718.867288,1355.7196795,1835.8544015,1541.50797133,2137.958312,1646.784651,1003.454226,1358.693892,1231.613212,1372.718494,1378.654276,1394.649274,1070.596856,1035.535227,931.49706,1249.618562,1599.7848535,980.427399,1092.545148"	"IAEALNTSGLQEK,LTDAPNYESLK,IEALEQQIK"	CAC3	http://www.uniprot.org/uniprot/Q9LD43	33.940182
588355712	646011264	632231104	562186880	601016768	602871360	556569472	706208128	529312608	593343168	464074432	506116512	sp|Q9LJG3|ESM1_ARATH	Q9LJG3	1	22	22	44059.748	"99.7,99.7,99.7,99.7,99.7,99.7,99.7,99.7,92.7,99.7,99.7,99.4,99.1,99.7,99.7,99.7,99.7,99.7,99.7,99.0,99.7,99.7"	"ANPNADASAQQAFVTNVINR,ANPNADASAQQAFVTNVINR | Deamidated [N16],ANPNADASAQQAFVTNVINR | Deamidated [N4],ANPNADASAQQAFVTNVINR | Deamidated [Q10],ANPNADASAQQAFVTNVINR | Deamidated [Q11],AQEEMAHLLYGADPDVVQPMTVR,AQEEMAHLLYGADPDVVQPMTVR | Oxidation [M20],AQEEMAHLLYGADPDVVQPMTVR | Oxidation [M5 M20],AQEEMAHLLYGADPDVVQPMTVR | Oxidation [M5],DLPQTYWPYGK,ELIVYPTGETMR,ELIVYPTGETMR | Oxidation [M11],EYWEPNNLAI…	sp|Q9LJG3|ESM1_ARATH GDSL esterase/lipase ESM1 OS=Arabidopsis thaliana GN=ESM1 PE=1 SV=1	sp|Q9LJG3|ESM1_ARATH	"2100.033603,2101.020902,2101.020641,2101.029716,2101.019764,2569.22939733,2585.222599,2601.2215565,2585.208006,1366.655564,1407.70594,1423.7015265,1403.682014,2335.9784235,1794.061578,1118.579757,1134.574705,1494.74958,950.543564,1037.461166,1638.755887,1639.739134"	"IGPMLNEFAK,SYFFFDGR,LLYSLGASK"	ESM1	http://www.uniprot.org/uniprot/Q9LJG3	39.795918
29679276	33519848	33991724	29065652	24725720	31241404	24776960	22550056	27822888	26434060	25863808	22498152	sp|Q9SIB9|ACO2M_ARATH	Q9SIB9	3	22	15	108200.022	"99.6,99.7,99.7,99.7,98.6,99.5,98.5,98.9,99.0,99.1,99.5,99.7,99.5,99.7,99.7,98.1,99.7,99.7,99.7,99.4,99.7,99.7"	"ADWHSCLDSK | Carbamidomethyl [C6],ANNMFVDYNEPQQDR,ANNMFVDYNEPQQDR | Oxidation [M4],DMTMDPPGPHNVK,DMTMDPPGPHNVK | Oxidation [M2 M4],GIFTTLPKPGGGEFGK,GNDEIMAR,GNDEIMAR | Oxidation [M6],ILLESAIR,LMNGEVGPK,LSVFDAAMR,LSVFDAAMR | Oxidation [M8],NCDNFQVTK | Carbamidomethyl [C2],NGVTATDLVLTVTQMLR,QVEIPFKPAR,RGNDEIMAR,SENAVQANMELEFQR | Oxidation [M9],SGEDADTLGLTGHER,SSGEDTIILAGAEYGSGSSR,TSLAPGSGVVTK,VVNF…	"sp|Q9SIB9|ACO2M_ARATH Aconitate hydratase 2, mitochondrial OS=Arabidopsis thaliana GN=ACO2 PE=1 SV=2"	"sp|Q9SIB9|ACO2M_ARATH,sp|Q42560|ACO1_ARATH,sp|Q94A28|ACO3M_ARATH"	"1217.51325,1839.784846,1855.7795,1437.637851,1469.627466,1604.854514,904.407358,920.40117,913.55983,943.479742,1008.505964,1024.501196,1124.491936,1830.988458,1183.67157933,1060.507986,1780.805454,1556.70713,1955.9017055,1115.618696,1549.777822,2869.445336"	"SGEDADTLGLTGHER,VVNFSFDGQPAELK,LSVFDAAMR"	ACO2	http://www.uniprot.org/uniprot/Q9SIB9	22.929293
120180864	143866944	147301824	150928880	140753104	137360096	155498144	118977648	139576032	126108328	131705320	151165584	sp|O23255|SAHH1_ARATH	O23255	2	21	6	53377.962	"99.7,99.7,98.9,99.7,99.7,99.7,99.2,99.7,99.7,99.0,99.0,99.7,99.5,98.9,99.7,99.7,99.7,99.7,99.7,99.0,99.7"	"AGIIVLAEGR,DIIMVDHMR,DIIMVDHMR | Oxidation [M4 M8],DIIMVDHMR | Oxidation [M4],DIIMVDHMR | Oxidation [M8],DMSQADFGR,DMSQADFGR | Oxidation [M2],DQSDYVSIPIEGPYKPPHYR,DSAAVFAWK,EGLQVDPK,FDNLYGCR | Carbamidomethyl [C7],GETLQEYWWCTER | Carbamidomethyl [C10],HSLPDGLMR,HSLPDGLMR | Oxidation [M8],ITIKPQTDR,LELELAEVEMPGLMACR | Carbamidomethyl [C16] Oxidation [M10 M14],LVGVSEETTTGVK,SKFDNLYGCR | Carbamidom…	sp|O23255|SAHH1_ARATH Adenosylhomocysteinase 1 OS=Arabidopsis thaliana GN=SAHH1 PE=1 SV=1	"sp|Q9LK36|SAHH2_ARATH,sp|O23255|SAHH1_ARATH"	"997.592234,1128.542196,1160.5315335,1144.536828,1144.536704,1025.4236,1041.418924,2360.14258833,993.4921385,884.45994,1043.450012,1756.751103,1024.512632,1040.507001,1070.608695,1991.9377865,1318.695798,1258.576274,1136.549982,849.543692667,2177.972097"	"TEFGPSQPFK,AGIIVLAEGR,DQSDYVSIPIEGPYKPPHYR"	SAHH1	http://www.uniprot.org/uniprot/O23255	35.670103
73079608	95649896	77558136	73471592	68806912	65529628	83711368	61786280	72102256	55845220	62860080	73420768	sp|O82662|SUCB_ARATH	O82662	1	21	21	45345.035	"99.7,94.8,99.7,99.4,99.0,99.5,99.7,99.7,99.7,99.7,99.7,99.7,99.7,99.7,99.7,99.6,99.7,99.7,98.6,99.7,99.0"	"AIQDVFPNESELVVK,AIQDVFPNESELVVK | Deamidated [Q3],CDVIASGIVNAAK | Carbamidomethyl [C1],DEAEEIAGK,DPTQEDPR,GVAASSLEEVK,GVAASSLEEVKK,KGGTSIEDLAEK,KTDCTMLEINPLAETSTNQLVAADAK | Carbamidomethyl [C4],LEGTNVEQGK,LEGTNVEQGKR,LHGGTPANFLDVGGNASEHQVVEAFK,LITADDLDDAAEK,LNFDDNAAFR,LNIHEYQGAELMGK,MLGQVLVTK,MLGQVLVTK | Oxidation [M1],SAGPLIIACK | Carbamidomethyl [C9],SQILAGGR,VPIDVFAGITDEDAAK,VVDGLAPK"	"sp|O82662|SUCB_ARATH Succinyl-CoA ligase [ADP-forming] subunit beta, mitochondrial OS=Arabidopsis thaliana GN=At2g20420 PE=1 SV=1"	sp|O82662|SUCB_ARATH	"1686.882487,1687.86483,1316.67568,960.439438,956.418516,1088.571164,1216.6659485,1246.6389145,2833.385577,1073.53473,1229.635915,2693.3194595,1388.663982,1181.546196,1601.786349,987.579398,1003.573574,1028.569194,800.450234,1659.836379,797.464908"	"LNFDDNAAFR,LITADDLDDAAEK,VVDGLAPK"	At2g20420	http://www.uniprot.org/uniprot/O82662	52.256532
1065406912	1418405632	1231435648	1224662528	1315126272	1250077952	1407140736	1291129728	1202574208	1267074816	1218919424	1494409728	sp|P27140|BCA1_ARATH	P27140	5	21	11	37449.435	"99.7,99.7,99.7,99.0,99.7,99.7,99.7,99.7,98.2,99.7,99.7,99.7,99.7,99.7,99.7,99.7,99.7,99.7,99.7,99.7,99.7"	"AFDPVETIK,DVATILHWK,EKYETNPALYGELAK,GGYYDFVK,GLMSFPLDGNNSTDFIEDWVK,GLMSFPLDGNNSTDFIEDWVK | Oxidation [M3],KAFDPVETIK,NIANMVPPFDK,NIANMVPPFDK | Deamidated [N4],NIANMVPPFDK | Oxidation [M5],VCPSHVLDFQPGDAFVVR | Carbamidomethyl [C2],VCPSHVLDFQPGDAFVVR | Carbamidomethyl [C2] Deamidated [Q10],VENIVVIGHSACGGIK | Carbamidomethyl [C12],VEQITAALQTGTSSDK,VEQITAALQTGTSSDKK,VISELGDSAFEDQCGR | Carbamidomethy…	"sp|P27140|BCA1_ARATH Beta carbonic anhydrase 1, chloroplastic OS=Arabidopsis thaliana GN=BCA1 PE=1 SV=2"	"sp|P42737|BCA2_ARATH,tr|A8MQY4|A8MQY4_ARATH,tr|F4K873|F4K873_ARATH,tr|F4K875|F4K875_ARATH,sp|P27140|BCA1_ARATH"	"1018.534124,1081.591805,1724.864136,947.439305,2384.1036545,2400.094994,1146.629145,1244.62260833,1245.60639,1260.617153,2042.00754175,2042.993499,1651.872241,1647.8304195,1775.926109,1781.78727283,1782.771239,1467.728744,1659.898425,1234.510374,1250.505552"	"AFDPVETIK,VISELGDSAFEDQCGR | Carbamidomethyl [C14],VCPSHVLDFQPGDAFVVR | Carbamidomethyl [C2]"	BCA1	http://www.uniprot.org/uniprot/P27140	47.838617
552746624	632732864	601951360	591468992	593112960	661487168	679104960	806145856	568593792	649960576	513911200	587907008	sp|P37702|BGL38_ARATH	P37702	2	21	20	61132.032	"98.2,99.6,99.7,99.7,99.7,99.7,99.7,99.7,99.7,99.7,98.2,99.7,99.7,99.6,99.7,99.7,99.7,99.7,94.2,99.7,99.7"	"CPGGNSSTEPYIVAHNQLLAHAAAVDVYR | Carbamidomethyl [C1],DYADLCFELFGDR | Carbamidomethyl [C6],GFIFGVASSAYQVEGGR,GGADLGNGDTTCDSYTLWQK | Carbamidomethyl [C12],GGADLGNGDTTCDSYTLWQK | Carbamidomethyl [C12] Deamidated [N7],GIYYVMDYFK | Oxidation [M6],GLNVWDSFTHR,GMIGPVMITR,GMIGPVMITR | Oxidation [M2 M7],GMIGPVMITR | Oxidation [M7],GVNPGAIK,GYALGTDAPGR,IDYLCSHLCFLSK | Carbamidomethyl [C5 C9],LFNSGNFEK,LPE…	sp|P37702|BGL38_ARATH Myrosinase 1 OS=Arabidopsis thaliana GN=TGG1 PE=1 SV=1	"sp|Q9C5C2|BGL37_ARATH,sp|P37702|BGL38_ARATH"	"3109.500672,1619.695136,1743.85794167,2157.926821,2158.9107135,1313.600926,1330.64190767,1073.573322,1105.56249,1089.5673,754.434034,1076.524817,1654.7855715,1054.50906,1432.74368133,1717.913596,2794.259558,1519.71095633,1520.693256,1324.702158,1325.68599133"	"LPEFSETEAALVK,GVNPGAIK,GMIGPVMITR"	TGG1	http://www.uniprot.org/uniprot/P37702	41.959335
258581456	340648512	316885824	277642144	279484384	291394880	302659552	239690208	317939104	228665824	279823488	272688960	sp|P92549|ATPAM_ARATH	P92549	1	21	21	55044.727	"99.7,99.7,99.7,99.7,99.7,99.7,99.7,99.7,99.7,99.7,95.4,99.0,99.0,98.8,99.7,99.7,99.7,99.7,99.7,99.7,99.7"	"AAELTNLFESR,AILNSVKPELLQALK,AVDSLVPIGR,DNGMHALIIYDDLSK,DNGMHALIIYDDLSK | Oxidation [M4],EAFPGDVFYLHSR,GALSDHEQR,GIRPAINVGLSVSR,KMELDAFLK,KMELDAFLK | Oxidation [M2],KSVHEPMQTGLK,MELDAFLK,MELDAFLK | Oxidation [M1],NFYANFQVDEIGR,QPQYAPLPIEK,SVHEPMQTGLK,SVHEPMQTGLK | Oxidation [M6],TGSIVDVPAGK,TTIAIDTILNQK,VVDAMGVPIDGK,VVDAMGVPIDGK | Oxidation [M5]"	"sp|P92549|ATPAM_ARATH ATP synthase subunit alpha, mitochondrial OS=Arabidopsis thaliana GN=ATPA PE=1 SV=2"	sp|P92549|ATPAM_ARATH	"1249.629066,1635.99231433,1025.5877,1703.8196725,1719.8147085,1536.731937,1011.470991,1437.84201,1093.5838305,1109.5792565,1353.699486,965.4890005,981.484002,1571.736564,1282.691492,1225.6121915,1241.606991,1042.565894,1329.749903,1199.62188,1215.617316"	"AVDSLVPIGR,AAELTNLFESR,AILNSVKPELLQALK"	ATPA	http://www.uniprot.org/uniprot/P92549	32.938856
46739572	41704372	43698420	44228536	36851640	46773960	47304600	41939684	50790708	53383008	54715248	44881828	sp|Q39161|NIR_ARATH	Q39161	1	21	21	65504.195	"99.0,98.3,99.7,99.7,99.1,99.7,99.7,99.7,99.7,99.7,99.7,99.7,99.7,99.1,99.7,99.7,99.6,99.4,99.7,99.7,99.7"	"DYFGVNPQK,FSPEPSILMK,GEEGKPVEGADVYVGGR,GLASVGLTSLQSGMDNVR,GSSEDLVNK,IGSDSHIGEIYK,LADTYGSGELR,LFMENGIEELAK,LFMENGIEELAK | Oxidation [M3],LPNGVTTSAQTR,LQADDMDELAR,LQADDMDELAR | Oxidation [M6],LTVEQNIIIPNVETSK,LVSVPRPIR,QEGLSFVGLHVPVGR,SMEELDSEK,SMEELDSEK | Oxidation [M2],SSKDDIDVR,TEALLQEPFLK,VTELVPLVAEILIK,YGEDGCADVTTR | Carbamidomethyl [C6]"	"sp|Q39161|NIR_ARATH Ferredoxin--nitrite reductase, chloroplastic OS=Arabidopsis thaliana GN=NIR1 PE=1 SV=1"	sp|Q39161|NIR_ARATH	"1066.508106,1147.594654,1717.826583,1803.9142955,947.456044,1317.656862,1180.57176,1392.694932,1408.69004,1243.651796,1275.576165,1291.570958,1796.987315,1035.655224,1593.861745,1066.448758,1082.443086,1033.504908,1287.706804,1535.954731,1342.545188"	"TEALLQEPFLK,LQADDMDELAR,IGSDSHIGEIYK"	NIR1	http://www.uniprot.org/uniprot/Q39161	36.860068
45901144	46352240	42772988	36083500	36207712	34830800	48675888	46413600	38733052	44467820	49678792	36326712	sp|Q8GUM2|HSP7I_ARATH	Q8GUM2	2	21	18	73074.072	"99.7,99.7,98.7,99.7,99.7,99.7,99.0,99.0,99.7,99.7,99.7,99.7,99.6,99.0,94.9,98.0,99.7,99.7,99.2,97.1,98.4"	"APNGDAWVEANGQK,AVVTVPAYFNDAQR,FDDPQTQK,FSPSQIGANVLTK,GELLVGTPAK,GSGSSGSDGSSGEGTSGTEQTPEAEFEEASGSR,HLNITLTR,IAGLDVQR,IINEPTAAALSYGMNNK,IINEPTAAALSYGMNNK | Oxidation [M14],NSADTTIYSVEK,QAVTNPTNTIFGSK,RFDDPQTQK,SDNIDLTK,SKFEGLVGK,SQVFSTAADNQMQVGIK,SQVFSTAADNQMQVGIK | Oxidation [M12],TAMAGEDVEDIK,TAMAGEDVEDIK | Oxidation [M3],TTPSVVAMNQK,TTPSVVAMNQK | Oxidation [M8]"	"sp|Q8GUM2|HSP7I_ARATH Heat shock 70 kDa protein 9, mitochondrial OS=Arabidopsis thaliana GN=HSP70-9 PE=2 SV=1"	"sp|Q8GUM2|HSP7I_ARATH,sp|Q9LDZ0|HSP7J_ARATH"	"1455.673374,1549.788337,977.445226,1360.734782,983.565118,3120.253934,966.561294,870.492228,1805.897643,1821.893644,1326.630348,1476.757036,1133.546016,904.449776,963.538176,1822.888218,1838.885092,1277.580194,1293.578976,1174.599516,1190.596782"	"NSADTTIYSVEK,FSPSQIGANVLTK,IAGLDVQR"	HSP70	http://www.uniprot.org/uniprot/Q8GUM2	30.645161
68996360	74681512	71924040	67940264	61806488	70183056	67792432	52242844	62444404	67581224	66450060	64127720	sp|Q8L7B5|CH60B_ARATH	Q8L7B5	3	21	0	61977.802	"99.0,99.0,99.7,99.7,96.1,92.9,99.7,99.7,99.7,99.7,99.7,99.7,99.7,99.7,99.6,99.6,99.7,99.7,98.9,99.6,99.7"	"AGIIDPLK,APGFGENR,CELEDPLILIHEK | Carbamidomethyl [C1],EGVITIQDGK,GEYVDMIK,GEYVDMIK | Oxidation [M6],GVEDLADAVK,GYISPYFITNPK,IGGASETEVSEK,IGVQIIQNALK,LAVDTVVTNLQSR,LLEQDNPDLGYDAAK,LSTANFDQK,QVANATNDVAGDGTTCATVLTR | Carbamidomethyl [C16],SMVEASTSDYDK,SMVEASTSDYDK | Oxidation [M2],SVAAGMNAMDLR,SVAAGMNAMDLR | Oxidation [M6 M9],SVAAGMNAMDLR | Oxidation [M6],TLFNELEVVEGMK | Oxidation [M12],VTDALNATK"	"sp|Q8L7B5|CH60B_ARATH Chaperonin CPN60-like 1, mitochondrial OS=Arabidopsis thaliana GN=At2g33210 PE=2 SV=1"	"sp|Q8L7B5|CH60B_ARATH,sp|P29197|CH60A_ARATH,tr|F4IVR2|F4IVR2_ARATH"	"825.495964,846.397654,1607.809185,1058.561222,953.452946,969.44794,1015.51935,1398.717724,1205.577822,1195.728434,1414.777036,1660.795044,1022.50315,2234.060743,1331.555086,1347.549068,1234.580524,1266.56929,1250.576608,1523.754183,931.497366"	"IGVQIIQNALK,EGVITIQDGK,LLEQDNPDLGYDAAK"	At2g33210	http://www.uniprot.org/uniprot/Q8L7B5	33.675214
21467004	25529928	32029068	21075532	24829492	23890212	17047700	19205588	12928338	22051312	12720937	15680220	sp|Q8VZM7|POLL1_ARATH	Q8VZM7	2	21	18	92136.647	"99.0,99.7,94.1,99.4,99.7,99.0,99.7,99.7,99.2,99.7,98.8,99.7,99.7,99.7,99.7,99.7,97.8,99.7,99.7,99.7,94.9"	"AIIILPTK,DFDQLDILTK,DFLYTDMK,DLLLGDPSR,EGENPSFTELSER,LLFIAPLK,LLFIAPLKK,LLSTMTEQFR | Oxidation [M5],LTIVVISDR,QTLLLMSDTPR,SCSLNMTK | Carbamidomethyl [C2],SSYLFNTQLEK,TENMTVDETDDTR,TENMTVDETDDTR | Oxidation [M4],TENMTVDETDDTRK,TENMTVDETDDTRK | Oxidation [M4],VEPVENSTSK,VHNLASEIVDTK,VNFHPNDDEELMETDK,VNFHPNDDEELMETDK | Oxidation [M12],YEKGEEDIR"	sp|Q8VZM7|POLL1_ARATH Putative ion channel POLLUX-like 1 OS=Arabidopsis thaliana GN=At5g02940 PE=2 SV=1	"sp|Q940Y9|POLL2_ARATH,sp|Q8VZM7|POLL1_ARATH"	"867.57957,1206.61303,1031.463578,984.523632,1493.662706,913.600447,1041.695268,1240.611766,1014.607328,1273.669126,939.415596,1328.66067,1525.620756,1541.612964,1653.715236,1669.707474,1088.53384,1324.698391,1931.8202275,1947.814308,1137.529038"	"DFDQLDILTK,DLLLGDPSR,SSYLFNTQLEK"	At5g02940	http://www.uniprot.org/uniprot/Q8VZM7	20.541205
133408544	87503968	94797264	84594376	92963256	91770424	97674392	111100952	62048044	106689984	50640484	75673848	sp|Q96242|CP74A_ARATH	Q96242	1	21	21	58196.17	"99.6,99.0,99.7,99.7,99.7,99.7,98.2,99.7,99.7,99.5,99.0,99.7,99.7,98.0,99.7,99.7,99.7,99.7,99.7,99.7,99.0"	"ADAPGLITK,ADEFVPER,ADFGGSSDGTAFNFLAR,AFYGTNPADTK,AGEMLYGYQPLATR,AGEMLYGYQPLATR | Oxidation [M4],DFVVLVAR,DLFTGTYMPSTELTGGYR | Oxidation [M8],DLVIESHDAAFK,FEPPVTAQYGR,FVGEEGEK,HVLWSNGPETETPTVGNK | Deamidated [N6],IFPEFQATYSELFDSLEK,ILFPNMVK,ILSYLDPSEPK,NIPGNYGLPIVGPIK,SFPVLFDVDK,SFPVLFDVDKVEK,SNGGELTMGAIEK,SNGGELTMGAIEK | Oxidation [M8],SVVYECLR | Carbamidomethyl [C6]"	"sp|Q96242|CP74A_ARATH Allene oxide synthase, chloroplastic OS=Arabidopsis thaliana GN=CYP74A PE=1 SV=3"	sp|Q96242|CP74A_ARATH	"884.496726,961.450864,1731.784574,1183.5507,1568.767188,1584.761638,917.532568,2023.91937267,1343.6714325,1263.624714,893.412968,1965.94362067,2163.034608,960.546828,1260.66034,1550.881416,1165.602756,1521.807987,1305.623168,1321.61792,1024.501314"	"ADAPGLITK,SVVYECLR | Carbamidomethyl [C6],FEPPVTAQYGR"	CYP74A	http://www.uniprot.org/uniprot/Q96242	42.471042
11574219	10276686	13556087	10993211	10840621	11948287	11489382	8980414	11331173	11619516	10972551	11124007	sp|Q9LV03|GLUT1_ARATH	Q9LV03	1	21	21	241896.208	"98.9,99.7,99.4,99.7,99.0,99.5,99.6,99.7,99.7,99.7,98.3,99.7,99.7,99.7,99.6,99.5,99.2,99.7,99.7,94.5,99.7"	"ADMLELDR,ASEEADETEEK,AVGTMLSHEVTK,DGLQLHELAFPTR,DIIESVPEAER,DYYYADLGSER,HIVVDDDALK,IPEFNELVYQNR,LLETNNFPEFTGR,LNDWNEVMEESKPGPLLTTQSAR,MGISTLASYK,NTCPVGIATQDPVLR | Carbamidomethyl [C3],QMFAQVTNPPIDPIR | Oxidation [M2],SLLDSNHEDGNYISAK,SLPVYIETPICNVNR | Carbamidomethyl [C11],SNTGEGGELPSR,TVLQTDGQLK,VAIIGSGPAGLAAADQLNK,VEGATFEMLAR,VLDITYAK,VVVIGGGDTGTDCIGTSIR | Carbamidomethyl [C13]"	"sp|Q9LV03|GLUT1_ARATH Glutamate synthase 1 [NADH], chloroplastic OS=Arabidopsis thaliana GN=GLT1 PE=2 SV=2"	sp|Q9LV03|GLUT1_ARATH	"961.454148,1236.495438,1271.653674,1495.779096,1256.624796,1350.573416,1123.586248,1520.761452,1536.758234,2614.269438,1069.547204,1639.836342,1741.882118,1761.816057,1773.909006,1202.552926,1101.602358,1764.974254,1222.600386,921.516954,1875.935828"	"LLETNNFPEFTGR,IPEFNELVYQNR,DIIESVPEAER"	GLT1	http://www.uniprot.org/uniprot/Q9LV03	12.40942
32737904	28217488	31363608	31334128	26988624	33729344	28669944	21582812	29336480	26959812	29480880	30114760	sp|Q9LW85|MFP1_ARATH	Q9LW85	1	21	21	81971.504	"99.7,94.3,99.7,98.5,99.7,99.7,99.7,99.7,99.7,99.0,99.7,99.7,99.7,98.1,99.7,99.6,99.4,97.6,99.7,99.7,99.7"	"AAEETIESLK,AGEDKEALETK,AKEEQLSLINQLNSAK,DLVTELGR,DQIESLENSLSK,EEQLSLINQLNSAK,ELNSIYTQTSR,ENVEDAHILVMSLGK,EQEIQQLNENLDR,ITTLVAEK,KEQEIQQLNENLDR,KEQEIQQLNENLDR | Deamidated [Q7],KLEEDLGSAK,KSLETDLEEAVK,LKDQIESLENSLSK,MLDIELTTVK,NSAIEELNTR,VKDELEGVTHELK,VNTHASNLEDEK,VSDLETMLDESR,VSDLETMLDESR | Oxidation [M7]"	sp|Q9LW85|MFP1_ARATH MAR-binding filament-like protein 1 OS=Arabidopsis thaliana GN=MFP1 PE=2 SV=2	sp|Q9LW85|MFP1_ARATH	"1089.55526,1189.581666,1784.962004,901.48711,1361.666962,1585.828928,1310.646576,1653.836565,1627.780694,873.517014,1755.876969,1756.876509,1088.57093,1360.707152,1602.8464985,1161.630886,1145.567392,1495.788576,1355.630622,1393.638518,1409.634014"	"AAEETIESLK,ELNSIYTQTSR,DLVTELGR"	MFP1	http://www.uniprot.org/uniprot/Q9LW85	25.619835
48651404	44230784	46685340	54085440	53011556	59158380	44357456	36946192	44884740	41088332	55090276	45905784	sp|Q9SFH9|HEM21_ARATH	Q9SFH9	1	21	21	46689.844	"99.7,98.6,98.9,99.6,99.7,99.7,99.0,99.7,99.7,99.7,99.7,99.7,99.7,98.7,99.4,99.7,99.2,99.7,99.5,99.5,99.7"	"AGADVVSPSDMMDGR,AGADVVSPSDMMDGR | Oxidation [M11 M12],AGADVVSPSDMMDGR | Oxidation [M11],AGADVVSPSDMMDGR | Oxidation [M12],AVGVNSIVLFPK,DKSPLPIAAYQVSGEYSMIK,EALDSNPR,EDGVIMNDETVHQLCK | Carbamidomethyl [C15],HGLVQEVAK,NSTGDEAYNDNGLVPR,NSTGDEAYNDNGLVPR | Deamidated [N1],SALDAEGFQNVSIMSYTAK,SALDAEGFQNVSIMSYTAK | Oxidation [M14],SPLPIAAYQVSGEYSMIK | Oxidation [M16],TYQMNPANYR | Oxidation [M4],VMMESLM…	"sp|Q9SFH9|HEM21_ARATH Delta-aminolevulinic acid dehydratase 1, chloroplastic OS=Arabidopsis thaliana GN=HEMB1 PE=2 SV=1"	sp|Q9SFH9|HEM21_ARATH	"1506.644184,1538.633902,1522.637904,1522.638528,1242.733094,2196.111978,900.429706,1886.85157,979.544876,1720.76563,1721.75691133,2030.962983,2046.95677,1968.985719,1272.555056,1268.574579,1300.56397,1284.570022,1300.564084,1284.569078,1193.55023"	"AVGVNSIVLFPK,HGLVQEVAK,NSTGDEAYNDNGLVPR"	HEMB1	http://www.uniprot.org/uniprot/Q9SFH9	33.72093
56727644	55650428	55444312	60028152	49806440	61677288	55128016	52353912	60578720	51675568	57738804	58184680	sp|Q9SGC1|PGMC2_ARATH	Q9SGC1	4	21	0	63481.204	"99.7,99.7,99.0,99.7,99.7,99.1,99.6,99.7,99.7,98.6,99.0,99.6,99.7,99.7,99.4,99.7,99.7,99.7,99.0,99.7,99.7"	"ATGAFILTASHNPGGPTEDFGIK,EDFGGGHPDPNLTYAK,ELMGLLVK,FDVEVFDSADDYVK,FFGNLMDAGMCSVCGEESFGTGSDHIR | Carbamidomethyl [C11 C14] Oxidation [M10],GATLVVSGDGR,GIHPEVANVASADEFEYKDPVDGSVSK,LSGTGSEGATIR,LVTVEDIVR,LYIEQYEK,QHWATYGR,SIFDFESIK,SIFDFESIKK,SMPTSAALDVVAK,SMPTSAALDVVAK | Oxidation [M2],TDDAGGEPPEFGAAADGDADR,VDISTIGITSFEGPEGK,YDYENVDATAAK,YLFEDGSR,YNMENGGPAPESITDK | Deamidated [N5] Oxidation [M3],YN…	"sp|Q9SGC1|PGMC2_ARATH Probable phosphoglucomutase, cytoplasmic 2 OS=Arabidopsis thaliana GN=At1g70730 PE=2 SV=1"	"tr|F4I6W3|F4I6W3_ARATH,sp|Q9SGC1|PGMC2_ARATH,tr|F4I6W4|F4I6W4_ARATH,sp|O49299|PGMC1_ARATH"	"2300.14706,1716.7748005,901.530612,1647.73004,2996.220348,1030.541374,2859.351708,1147.581845,1042.602456,1084.543976,1017.47784,1084.544092,1212.639447,1288.66934,1304.663722,2032.826926,1748.88378,1358.598918,985.450368,1738.733956,1737.751424"	"LVTVEDIVR,LYIEQYEK,SMPTSAALDVVAK"	At1g70730	http://www.uniprot.org/uniprot/Q9SGC1	44.444444
33648068	29359044	30780616	39666112	35575392	34274380	34069432	22726892	36764312	26895156	38885960	33520536	sp|Q9SJE1|CHLD_ARATH	Q9SJE1	1	21	21	83282.735	"99.7,99.5,99.7,99.7,96.8,99.7,99.0,99.4,99.7,99.7,99.7,99.0,99.7,99.7,99.7,99.7,99.7,99.7,99.0,99.0,99.7"	"AGMSLLVIDTENK,AGMSLLVIDTENK | Oxidation [M3],AVELVILPR,DQVSIIPFR,EKVTIDDLR,ELKDEILEVAGK,FVSTGFAK,GDAAEVLLPPSR,GTTVFQPGLLAEAHR,HPCKPLLIATYNPEEGAVR | Carbamidomethyl [C3],KAVELVILPR,LAVDATLR,LLAESYTSR,MVNEETETAK,STDPESIAPDAPRPTSK,TALLLGAVDR,VAAVGIATQFQER,VAINLSADLPMSFEDR | Oxidation [M11],YIKPMLPK,YLVLEAVR,YYYLPNASDAVISATTR"	"sp|Q9SJE1|CHLD_ARATH Magnesium-chelatase subunit ChlD, chloroplastic OS=Arabidopsis thaliana GN=CHLD PE=1 SV=3"	sp|Q9SJE1|CHLD_ARATH	"1389.71708,1405.710966,1008.632848,1073.586748,1087.58794,1342.734387,855.448924,1223.65067,1595.8419255,2164.114641,1136.72847,857.497212,1038.53463,1150.515996,1767.8640085,1027.602694,1388.742458,1792.86555,988.577847,961.559954,1903.930225"	"LLAESYTSR,GTTVFQPGLLAEAHR,LAVDATLR"	CHLD	http://www.uniprot.org/uniprot/Q9SJE1	29.342105
24379100	27509220	25565800	30425940	27743488	25218928	27817884	22400940	28688944	22643136	26941400	28758760	sp|Q9ZPI1|SYKC_ARATH	Q9ZPI1	1	21	21	70887.046	"99.7,99.7,99.7,99.7,96.1,99.7,99.6,99.7,93.3,99.7,99.0,99.7,99.7,99.7,99.0,98.7,99.7,95.5,99.7,99.7,98.5"	"ALSELAMDSSTTLNAAESSAGDGAGPR,ALSELAMDSSTTLNAAESSAGDGAGPR | Oxidation [M7],AVAADDEEMDATQYYENR,AVAADDEEMDATQYYENR | Oxidation [M9],CPPPQTTAR | Carbamidomethyl [C1],EVLFFPAMRPPQEESAAAQAPLTEEK | Oxidation [M8],FAVSMSIPK,GDIVGVIGFPGK,GENPYPHK,HELCNAYTELNDPVVQR | Carbamidomethyl [C4],IAPELYLK,KPEIWVPGQTR,LFFYDLHGDDFK,LSMLLTDSLNIK | Oxidation [M3],NPEAYVLK,QLIVGGLER,RGDIVGVIGFPGK,RIEMIGELEK,SGLDEAEFLK,Y…	"sp|Q9ZPI1|SYKC_ARATH Lysine--tRNA ligase, cytoplasmic OS=Arabidopsis thaliana GN=At3g11710 PE=1 SV=1"	sp|Q9ZPI1|SYKC_ARATH	"2578.1799345,2594.1781905,2089.855136,2105.850686,1026.48996,2901.422565,978.521088,1157.643916,940.4388,2056.9631245,945.55387,1309.714251,1515.703485,1362.742682,932.496866,983.576032,1313.745507,1216.648392,1107.54373,2637.201364,980.47454"	"IAPELYLK,NPEAYVLK,SGLDEAEFLK"	At3g11710	http://www.uniprot.org/uniprot/Q9ZPI1	38.178914
11817146	7367658	10411663	11937179	10193036	10689744	10277398	9218410	10015411	15315083	11493187	12126739	tr|F4J9K9|F4J9K9_ARATH	F4J9K9	1	21	21	73453.108	"99.7,99.7,99.7,99.7,99.7,99.7,99.7,95.5,99.5,99.7,99.7,99.7,99.7,99.7,99.7,99.7,99.7,94.8,97.8,99.7,99.7"	"AEEKPTVESVVEEETK,AEETAEATEQAK,AVPTNQDLDTEPK,DETTSESGSALCPEK | Carbamidomethyl [C12],DVEALEVEPKPETSEK,EEEIDQTPAGEPEK,EETEGDAAAPADVIEK,EIISSDSADVVNDKPASDSNPVVTK,ETEEDVSSPADIIEK,GAEQVELKEPILVK,HVVDEPANEEKPSESSAALSPEK,HVVEEPSKDEK,IVDVSESTDEAEVQQVEPVDVQPVK,IVDVSESTDEAEVQQVEPVDVQPVKDAEK | Deamidated [Q15],QVESVDVQSVR,TSESGSALSPEK,VAEVVETAPVAK,VKDVEALEVEPKPETSEK,VVPINQDSDTKPK,VVPTNQDSDTEPK,YVVDEPSKDETT…	tr|F4J9K9|F4J9K9_ARATH Neurofilament protein-related protein OS=Arabidopsis thaliana GN=At3g05900 PE=1 SV=1	tr|F4J9K9|F4J9K9_ARATH	"1802.878392,1276.575794,1426.693314,1609.677318,1798.883786,1570.699926,1643.75234467,2586.270938,1660.76884,1551.887148,2449.159608,1295.631975,2738.352017,3182.555667,1244.63616,1191.5615,1211.675056,2026.045948,1439.762032,1428.673788,2527.125879"	"QVESVDVQSVR,AVPTNQDLDTEPK,VAEVVETAPVAK"	At3g05900	http://www.uniprot.org/uniprot/F4J9K9	43.090639
42115240	55768168	49620224	55004340	51399892	57722352	55179212	38548496	51605704	42130792	49238096	45531756	sp|O04151|CALR1_ARATH	O04151	2	20	12	48526.726	"99.0,99.7,98.4,98.4,99.7,99.6,99.5,99.5,99.7,99.7,99.7,99.5,99.0,99.7,99.7,99.6,99.7,99.7,99.7,98.9"	"AAFDEAEK,AAFDEAEKK,APMIDNPEFK,APMIDNPEFK | Oxidation [M3],APMIDNPEFKDDPELYVFPK | Oxidation [M3],DDNTAGEWK,DDPELYVFPK,EAEETDAAHDEL,EYIPDPEDTKPAGYDDIPK,GIQTSEDYR,KDDNTAGEWK,KPEDWDDEEDGEWTAPTIPNPEYNGEWKPK,KPEDWDDK,KPEDWDDKEYIPDPEDTKPAGYDDIPK,LDCGGGYMK | Carbamidomethyl [C3],LDCGGGYMK | Carbamidomethyl [C3] Oxidation [M8],LLSDDVDQTK,QTGSLYSDWDLLPAKK,SGSLFDNVLVSDDPEYAK,YVGVELWQVK"	sp|O04151|CALR1_ARATH Calreticulin-1 OS=Arabidopsis thaliana GN=CRT1 PE=1 SV=1	"sp|O04151|CALR1_ARATH,sp|Q38858|CALR2_ARATH"	"879.3973035,1007.491272,1160.553304,1176.54773,2380.130739,1034.431006,1221.591668,1328.536794,2162.005412,1067.488584,1162.524738,3571.565252,1031.45518,3175.45025,999.415228,1015.409426,1132.560928,1820.931102,1954.9170435,1219.659762"	"YVGVELWQVK,EYIPDPEDTKPAGYDDIPK,LLSDDVDQTK"	CRT1	http://www.uniprot.org/uniprot/O04151	42.352941
76947720	62955732	68173456	74670288	69789304	66253632	76620504	64918736	69072464	65080340	65735804	72436296	sp|O23254|GLYC4_ARATH	O23254	1	20	20	51717.335	"99.7,99.7,99.2,99.6,99.7,94.2,99.7,99.4,98.6,99.7,99.7,98.9,99.7,99.7,99.7,99.7,99.0,99.7,99.7,99.7"	"ANAVALGNYLMSK,ANAVALGNYLMSK | Oxidation [M11],AVTLTLDIQK,FSASYEMPGFLMSEMK | Oxidation [M12 M15],FSASYEMPGFLMSEMK | Oxidation [M7 M12 M15],FSASYEMPGFLMSEMK | Oxidation [M7 M15],FSASYEMPGFLMSEMK | Oxidation [M7],GQPEGAVYDFEDK,IGAPAMTSR,IGAPAMTSR | Oxidation [M6],IMGLDLPSGGHLTHGYYTSGGK,IMGLDLPSGGHLTHGYYTSGGK | Oxidation [M2],ISATSIYFESLPYK,LCDLCSITLNK | Carbamidomethyl [C2 C5],LLICGGSAYPR | Carbami…	sp|O23254|GLYC4_ARATH Serine hydroxymethyltransferase 4 OS=Arabidopsis thaliana GN=SHM4 PE=1 SV=1	sp|O23254|GLYC4_ARATH	"1350.696178,1366.69095,1100.643992,1885.795106,1901.788292,1885.792454,1869.797838,1453.63656,902.464202,918.45863,2260.0918635,2276.08948,1617.827872,1335.65243,1205.622208,1516.763597,861.433716,1434.665836,1933.9307305,991.47217"	"YSEGIPGNR,LLICGGSAYPR | Carbamidomethyl [C4],LCDLCSITLNK | Carbamidomethyl [C2 C5]"	SHM4	http://www.uniprot.org/uniprot/O23254	35.66879
24306228	21887620	24614932	28357720	25903412	25757768	25274472	22920292	26838144	24881412	24350336	25097392	sp|O49160|EIF3C_ARATH	O49160	1	20	20	102947.802	"99.7,99.5,98.0,98.9,99.7,98.8,99.7,99.7,99.7,99.2,99.7,98.0,99.0,99.7,99.2,99.7,99.7,99.3,99.7,99.1"	"DNNQDYAGAASGGGGYWQDK,EAPEVEEEK,EITWDWVNKK,ELLAQGVSQSR,FEEMTYTVDQMK,FEEMTYTVDQMK | Oxidation [M4 M11],FELVDQLTHLTK,INDWVSLQENFDK,ITEAVKPPTLYIK,KPTFPESSR,LAELVEEEEETEEAK,LSILAESNER,LYEDDINK,MFDVSEPQVHSIVSK,QAFTAPPENVR,SSGQNGQWSGQNR,TGGGGLDLSSR,TMAQLGLCAFR | Carbamidomethyl [C8],VEAIYYKPQEVYDAMR,VEAIYYKPQEVYDAMR | Oxidation [M15]"	sp|O49160|EIF3C_ARATH Eukaryotic translation initiation factor 3 subunit C OS=Arabidopsis thaliana GN=TIF3C1 PE=1 SV=2	sp|O49160|EIF3C_ARATH	"2072.846316,1058.476094,1317.67173,1186.630156,1520.65266,1552.641268,1442.7760195,1606.762612,1471.864917,1047.536192,1746.806682,1130.59317,1008.476044,1701.836982,1228.618744,1404.612576,1018.504948,1266.619812,1973.954319,1989.946245"	"ELLAQGVSQSR,LSILAESNER,LYEDDINK"	TIF3C1	http://www.uniprot.org/uniprot/O49160	24.333333
12504712	14036232	14938290	13439397	11265051	13090399	15113689	12882775	13530448	13362912	13104949	13718696	sp|O80977|VSR3_ARATH	O80977	3	20	11	69743.416	"99.2,94.7,99.7,99.7,99.0,99.7,99.7,99.7,99.0,99.7,98.9,99.7,99.7,99.7,99.7,99.7,98.8,97.4,99.7,99.7"	"ACQCPECSCK | Carbamidomethyl [C2 C4 C7 C9],AGASAVLVADNVDEPLITMDTPEEDVSSAK | Deamidated [N11] Oxidation [M19],AGASAVLVADNVDEPLITMDTPEEDVSSAK | Oxidation [M19],CDMLMEFVK | Carbamidomethyl [C1],CEDINECK | Carbamidomethyl [C1 C7],CMGDPDADLDNPVLK | Carbamidomethyl [C1],CMGDPDADLDNPVLK | Carbamidomethyl [C1] Oxidation [M2],CTINNGGCWHEER | Carbamidomethyl [C1 C8],DVVVENLR,EFSDFSISFK,GDCFFALK | Carbamid…	sp|O80977|VSR3_ARATH Vacuolar-sorting receptor 3 OS=Arabidopsis thaliana GN=VSR3 PE=2 SV=1	"sp|P93026|VSR1_ARATH,sp|Q56ZQ3|VSR4_ARATH,sp|O80977|VSR3_ARATH"	"1298.446976,3060.45243,3059.4511935,1171.50767,1066.404438,1658.727424,1674.722911,1631.6573705,942.513214,1205.559734,956.44241,1474.58725,1509.850707,2723.303025,2739.297507,1260.656184,1040.45993,1056.45456,1537.690016,1934.761082"	"NSLSVTSPESIK,GDCFFALK | Carbamidomethyl [C3],GTHDSAIGNFGIPQYGGSMAGTVVYPK"	VSR3	http://www.uniprot.org/uniprot/O80977	34.394904
159167200	98809248	144985072	192216448	174087184	175015808	131339512	115945688	161724224	119162512	203005696	170936880	sp|P21218|PORB_ARATH	P21218	3	20	19	43358.738	"99.0,99.7,99.7,99.7,99.7,99.7,99.7,99.7,99.7,99.7,99.0,99.7,99.7,99.0,99.7,99.7,99.7,99.7,99.7,99.0"	"ALFPPFQK,DSYTVMHLDLASLDSVR | Oxidation [M6],GLAGGLNGLNSSAMIDGGDFDGAK,GLAGGLNGLNSSAMIDGGDFDGAK | Deamidated [N7],GLAGGLNGLNSSAMIDGGDFDGAK | Deamidated [N7] Oxidation [M14],GLAGGLNGLNSSAMIDGGDFDGAK | Oxidation [M14],GNVVVTGASSGLGLATAK,GYVSETESGK,GYVSETESGKR,KGNVVVTGASSGLGLATAK,KVWEISEK,LAQVVSDPSLTK,LIIVGSITGNTNTLAGNVPPK,LLLDDLKK,TETPLDVLVCNAAVYFPTAK | Carbamidomethyl [C10],VCNMLTMQEFHR | Carbamido…	"sp|P21218|PORB_ARATH Protochlorophyllide reductase B, chloroplastic OS=Arabidopsis thaliana GN=PORB PE=1 SV=3"	"sp|P21218|PORB_ARATH,sp|O48741|PORC_ARATH,tr|F4I2F8|F4I2F8_ARATH"	"946.527802,1936.9209325,2236.04299,2237.0281325,2253.02387333,2252.0392685,1600.878189,1055.477206,1211.5778535,1728.9732955,1017.55018,1256.697296,2078.172018,956.5900805,2208.117208,1564.6949715,1596.68485,1580.690475,1580.689899,1048.494772"	"LAQVVSDPSLTK,GNVVVTGASSGLGLATAK,WNVIMACR | Carbamidomethyl [C7]"	PORB	http://www.uniprot.org/uniprot/P21218	41.895262
2393158	3.47035e+06	3424098	2.50984e+06	2151281	2926686	2842137	1.76358e+06	2.40136e+06	2.26596e+06	2.58791e+06	2.84044e+06	sp|P42697|DRP1A_ARATH	P42697	3	20	2	68171.474	"99.0,97.6,99.7,99.7,99.0,99.7,98.9,99.7,99.7,99.5,99.7,96.5,99.7,99.7,99.2,99.0,96.8,99.7,99.7,99.7"	"EIQDETDR,EVDPSGDR,EYAEFLHLPR,EYFSNTTEYR,FTDFAAVR,GPAEASVDTVHAILK,GTDAVEILEGR,IPGIQSLINK,LGKPIAADAGGK,LIESSIVSIR,LSSLLNEDPAIMER,LSSLLNEDPAIMER | Oxidation [M12],LVTEADGYQPHLIAPEQGYR,RPLVLQLQK,SSVLESIVGK,SVNETVELK,TVLELETELSR,VAVDGQSDSIVK,VEVTNAAIESLDK,VYNVFDNQLPAALK"	sp|P42697|DRP1A_ARATH Dynamin-related protein 1A OS=Arabidopsis thaliana GN=DRP1A PE=1 SV=3	"tr|F4K015|F4K015_ARATH,sp|P42697|DRP1A_ARATH,sp|Q9FNX5|DRP1E_ARATH"	"1004.439896,873.380958,1273.645029,1308.56201,925.464794,1506.802929,1158.588624,1081.649538,1096.623505,1115.654348,1586.79816,1602.791224,2256.119223,1093.698486,1017.57054,1017.5343,1288.68454,1216.629646,1387.718892,1590.8403905"	"GPAEASVDTVHAILK,LSSLLNEDPAIMER | Oxidation [M12]"	DRP1A	http://www.uniprot.org/uniprot/P42697	35.081967
57959096	57069240	65032136	67974048	60025420	60813492	57501328	63179948	62890440	70713352	45097248	67697264	sp|P53492|ACT7_ARATH	P53492	6	20	5	41735.32	"99.7,99.7,99.7,99.0,99.0,99.7,99.7,99.7,99.7,99.7,99.7,99.7,95.1,99.7,99.7,99.7,99.7,99.7,99.7,99.7"	"AGFAGDDAPR,AVFPSIVGRPR,DAYVGDEAQSK,DLTDSLMK,DLTDSLMK | Oxidation [M7],EITALAPSSMK,EITALAPSSMK | Oxidation [M10],GYMFTTTAER,HTGVMVGMGQK,HTGVMVGMGQK | Oxidation [M5 M8],HTGVMVGMGQK | Oxidation [M5],HTGVMVGMGQK | Oxidation [M8],IWHHTFYNELR,KDLYGNIVLSGGSTMFPGIADR | Oxidation [M15],LAYVALDYEQELETAK,NYELPDGQVITIGAER,SEYDESGPSIVHR,VAPEEHPVLLTEAPLNPK,YPIEHGIVSNWDDMEK,YPIEHGIVSNWDDMEK | Oxidation [M14]"	sp|P53492|ACT7_ARATH Actin-7 OS=Arabidopsis thaliana GN=ACT7 PE=1 SV=1	"sp|Q96292|ACT2_ARATH,sp|P0CJ46|ACT1_ARATH,sp|P53492|ACT7_ARATH,sp|P53496|ACT11_ARATH,sp|P0CJ47|ACT3_ARATH,sp|Q96293|ACT8_ARATH"	"975.441588,1197.697824,1181.5198505,921.447782,937.442366,1146.595402,1162.590113,1175.52771,1143.552357,1175.540684,1159.547846,1159.547298,1514.742812,2326.160694,1854.92804567,1773.88915567,1474.6692305,1953.056286,1931.87239,1947.8676685"	"DLTDSLMK,DLTDSLMK | Oxidation [M7],SEYDESGPSIVHR"	ACT7	http://www.uniprot.org/uniprot/P53492	48.806366
91199224	86089576	81188184	75115912	71952800	74687952	82866864	81036384	82970296	86385800	91463072	75533864	sp|P55228|GLGS_ARATH	P55228	1	20	20	56649.908	"99.7,99.0,99.7,99.7,94.4,97.9,98.6,99.7,99.7,99.0,98.6,99.7,99.7,99.7,99.7,99.7,99.7,98.2,99.0,99.7"	"AKPAVPLGANYR,ATAFGLMK,AYASNMGGYK,AYASNMGGYK | Oxidation [M6],DALIPTGTVI,DVMLDLLR,DVMLDLLR | Oxidation [M3],ETDADITVAALPMDEQR,ETDADITVAALPMDEQR | Oxidation [M13],ETDGYFIK,GSVPIGIGK,IHHSVVGLR,IIEFAEKPK,IINSDNVQEAAR,IYVLTQFNSASLNR,KPVPDFSFYDR,LIDIPVSNCLNSNISK | Carbamidomethyl [C9],SAPIYTQPR,SGIVTVIK,VDTTILGLDDQR"	"sp|P55228|GLGS_ARATH Glucose-1-phosphate adenylyltransferase small subunit, chloroplastic OS=Arabidopsis thaliana GN=APS1 PE=2 SV=2"	sp|P55228|GLGS_ARATH	"1255.703487,837.441731,1060.46498,1076.459374,998.565594,973.526986,989.521626,1873.87398,1889.86685,971.461514,826.491163,1016.587908,1073.611956,1328.667808,1624.8558465,1369.666821,1785.929434,1031.540052,815.511766,1344.686244"	"VDTTILGLDDQR,IIEFAEKPK,SAPIYTQPR"	APS1	http://www.uniprot.org/uniprot/P55228	35
635876992	488788832	643217216	574466112	482062752	619749504	578167616	629816256	663406080	663680640	663035264	676858368	sp|P56771|CYF_ARATH	P56771	1	20	20	35356.38	"99.7,99.0,99.7,99.7,99.7,99.7,98.9,99.7,98.3,99.0,99.0,99.7,99.7,99.7,97.5,99.7,99.0,99.0,99.7,99.7"	"EKGGYEITIVDASNGR,EVIDIIPR,GALNVGAVLILPEGFELAPPDR,GGYEITIVDASNGR,GGYEITIVDASNGR | Deamidated [N12],GLELLVSEGESIK,GQIYPDGSK,IGNLSFQNYRPNK,IGNLSFQNYRPNKK,IPYDMQLK,IPYDMQLK | Oxidation [M5],KNILVIGPVPGQK,NILVIGPVPGQK,SNNTVYNATAGGIISK,SNNTVYNATAGGIISK | Deamidated [N2 N7],SNNTVYNATAGGIISK | Deamidated [N7],VQLSEMNF,VQLSEMNF | Oxidation [M6],YPIYVGGNR,YSEITFPILAPDPATNK"	sp|P56771|CYF_ARATH Cytochrome f OS=Arabidopsis thaliana GN=petA PE=3 SV=1	sp|P56771|CYF_ARATH	"1707.8421255,953.555306,2247.22947,1450.705032,1451.686198,1372.7434666,963.466436,1549.80005533,1677.89365,1006.51557,1022.511262,1361.839593,1233.7448205,1608.8110775,1610.791234,1609.794018,966.448427,982.443401,1037.52982,1875.961698"	"EVIDIIPR,YPIYVGGNR,NILVIGPVPGQK"	petA	http://www.uniprot.org/uniprot/P56771	47.5
260187472	303132576	274529408	250839904	223586944	254317920	242284016	251394496	253402576	237853264	263148688	263736480	sp|P83483|ATPBM_ARATH	P83483	3	20	0	59670.207	"99.7,99.7,99.7,96.9,99.4,98.7,99.7,99.7,99.7,99.7,99.7,99.7,99.7,99.7,99.7,99.7,99.7,99.7,99.7,99.7"	"AHGGFSVFAGVGER,CALVYGQMNEPPGAR | Carbamidomethyl [C1],CALVYGQMNEPPGAR | Carbamidomethyl [C1] Oxidation [M8],DAEGQDVLLFIDNIFR,EMIESGVIK,EMIESGVIK | Oxidation [M2],ENINSFQGLLDGK,FEDQEGLPPIMTSLEVQDHPTR,FEDQEGLPPIMTSLEVQDHPTR | Oxidation [M11],FTQANSEVSALLGR,IMNVLGEPIDER,IMNVLGEPIDER | Oxidation [M2],IPSAVGYQPTLASDLGALQER,LVLEVSHHLGQNVVR,TEHYLPIHR,TIAMDGTEGLVR | Oxidation [M4],VCQVIGAIVDVR | Carbami…	"sp|P83483|ATPBM_ARATH ATP synthase subunit beta-1, mitochondrial OS=Arabidopsis thaliana GN=At5g08670 PE=1 SV=1"	"sp|P83484|ATPBN_ARATH,sp|Q9C5A9|ATPBO_ARATH,sp|P83483|ATPBM_ARATH"	"1389.679752,1661.764162,1677.759618,1863.94439,1004.521146,1020.516198,1433.715354,2538.203877,2554.198617,1491.7672525,1384.701661,1400.696708,2185.1388695,1698.95238033,1164.603829,1277.62817,1327.728431,1424.764828,1392.808322,1172.655358"	"VLNTGAPITVPVGR,ENINSFQGLLDGK,EMIESGVIK"	At5g08670	http://www.uniprot.org/uniprot/P83483	39.748201
58105808	70803840	72179152	71948848	90442064	77398424	94189280	100828176	78002512	88906016	42606052	71051392	sp|P93819|MDHC1_ARATH	P93819	2	20	10	35570.57	"99.0,99.0,99.3,98.0,98.7,99.7,99.7,99.7,99.7,99.7,99.7,99.4,99.7,98.3,99.7,99.7,96.0,99.0,99.7,99.7"	"ALGQISER,DLAYSCLS | Carbamidomethyl [C6],EFAPSIPEK,KMDLTAEELK,KMDLTAEELK | Oxidation [M2],KMDLTAEELKEEK,LSSALSAASSACDHIR | Carbamidomethyl [C12],LSVPVSDVK,MDLTAEELK,MDLTAEELK | Oxidation [M1],MDLTAEELKEEK,MDLTAEELKEEK | Oxidation [M1],MELIDAAFPLLK,MELIDAAFPLLK | Oxidation [M1],NGDWSIVQGLPIDEVSR,NVIIWGNHSSSQYPDVNHAK,NVIIWGNHSSSQYPDVNHAK | Deamidated [N1 N7],SQAAALEK,VLVVANPANTNALILK,VQTSSGEKPVR"	"sp|P93819|MDHC1_ARATH Malate dehydrogenase, cytoplasmic 1 OS=Arabidopsis thaliana GN=MDH1 PE=1 SV=2"	"sp|P57106|MDHC2_ARATH,sp|P93819|MDHC1_ARATH"	"872.471306,927.400969,1016.518072,1176.60547,1192.600214,1562.7862575,1644.789555,942.537918,1048.51099,1064.506176,1434.690964,1450.687306,1359.747376,1375.736316,1883.943186,2265.094401,2267.078091,816.433594,1648.9871595,1186.627643"	"ALGQISER,NVIIWGNHSSSQYPDVNHAK,VQTSSGEKPVR"	MDH1	http://www.uniprot.org/uniprot/P93819	44.277108
23391644	27863484	28692424	26797192	25560752	25116372	29613036	22994348	29211964	28225368	25503164	25111828	sp|Q8L611|SC31B_ARATH	Q8L611	2	20	0	119873.44	"99.0,96.6,99.7,99.7,99.7,99.7,99.5,99.6,99.7,99.0,99.7,99.7,98.3,99.7,99.7,99.6,99.7,99.7,99.7,99.7"	"ALIVGDYK,DFMPSDTDFSTK,DLPLVGEIPSSER,DQAVDGLSSDLNGIR,EAVDQCITANK | Carbamidomethyl [C6],GEETQEMQEEEEESSDPVFDNAIQR,GEETQEMQEEEEESSDPVFDNAIQR | Deamidated [Q8],IGIYNIEGCSR | Carbamidomethyl [C9],IPGVISASSFDGK,LDFQSDDR,LFNETSEALGGAR,LISHLGFTLPVAEK,MPQVVAPAAGPIGFTPMATPGVAPR | Oxidation [M17],QKPIINFADSVR,RPVGASFGFGGK,SYAELLQDLMEK | Oxidation [M10],TLVLALATGNK,TLVLALATGNKK,VVSAMVNNDLR | Oxidation [M5]…	sp|Q8L611|SC31B_ARATH Protein transport protein SEC31 homolog B OS=Arabidopsis thaliana GN=SEC31B PE=1 SV=1	"tr|F4J110|F4J110_ARATH,sp|Q8L611|SC31B_ARATH"	"877.490348,1389.575756,1410.73406,1558.758258,1247.580208,2925.2099308,2926.215884,1280.618148,1276.666048,994.435896,1363.672222,1523.866113,2448.269714,1386.7619455,1178.61964967,1454.696336,1099.66028,1227.754593,1232.618312,1537.740803"	"IPGVISASSFDGK,LFNETSEALGGAR,YGVEENNFGTAPLK"	SEC31B	http://www.uniprot.org/uniprot/Q8L611	21.82971
38885316	36964148	34656660	38578512	34652800	32669928	32445200	32545244	36142272	31920176	33683124	32440192	sp|Q9FGC7|ZEP_ARATH	Q9FGC7	1	20	20	73841.147	"98.0,99.7,99.4,99.6,99.7,99.6,99.7,98.7,99.0,99.7,99.7,99.3,99.7,99.7,99.7,99.7,99.7,99.7,99.7,98.8"	"ATPNFPAR,DEDQPCIVGSEPDQDFPGMR | Carbamidomethyl [C6],DEDQPCIVGSEPDQDFPGMR | Carbamidomethyl [C6] Oxidation [M19],EWFEDDDALER,FDTFTPAASR,GFDVLVFEK,INGLVDGISGTWYVK,IVIPSSQVSK,LQGRPPSCR | Carbamidomethyl [C8],MAAIMASTYK,MQWYAFHEEPAGGADAPNGMK,MQWYAFHEEPAGGADAPNGMK | Oxidation [M1 M20],MQWYAFHEEPAGGADAPNGMK | Oxidation [M20],MTLQQILAR,MTLQQILAR | Oxidation [M1],NESNVVDFEDSGDK,QSVETTTPVDVVSSLK,QYFVSSD…	"sp|Q9FGC7|ZEP_ARATH Zeaxanthin epoxidase, chloroplastic OS=Arabidopsis thaliana GN=ZEP PE=1 SV=1"	sp|Q9FGC7|ZEP_ARATH	"872.450326,2290.947538,2306.945956,1423.58887,1111.530896,1052.554584,1620.850714,1056.617776,1069.543113,1085.524886,2305.989321,2337.977349,2321.980626,1072.605646,1088.60092,1553.650514,1688.883662,1242.58752,1463.626689,878.428954"	"IVIPSSQVSK,FDTFTPAASR,SPGFTWGK"	ZEP	http://www.uniprot.org/uniprot/Q9FGC7	29.235382
334511648	329907296	363340352	354967808	293981408	387458624	323931200	311439136	326928864	334572096	306406080	343707680	sp|Q9FKW6|FNRL1_ARATH	Q9FKW6	2	20	16	40325.998	"99.7,99.7,99.7,99.7,99.7,99.0,99.7,99.7,99.7,99.7,99.7,99.7,99.7,99.7,99.7,99.7,99.7,99.7,99.7,99.7"	"AQVTTDTTEAPPVK,DGIDWLEYK,DNTFVYMCGLK | Carbamidomethyl [C8],DNTFVYMCGLK | Carbamidomethyl [C8] Oxidation [M7],EGQSIGVIPEGIDK,EKNPDNFR,GIDDIMVSLAAK,GVCSNFLCDLKPGDEAK | Carbamidomethyl [C3 C8],ITGDDAPGETWHIVFTTEGEVPYR,KDNTFVYMCGLK | Carbamidomethyl [C9],KDNTFVYMCGLK | Carbamidomethyl [C9] Oxidation [M8],KQEEGIVVNK,LVYTNDGGEIVK,LYSIASSAIGDFGDSK,MAEYAEELWELLK,MFFEEHEDYK,MFFEEHEDYK | Oxidation [M1],Q…	"sp|Q9FKW6|FNRL1_ARATH Ferredoxin--NADP reductase, leaf isozyme 1, chloroplastic OS=Arabidopsis thaliana GN=LFNR1 PE=1 SV=1"	"sp|Q9FKW6|FNRL1_ARATH,sp|Q8W493|FNRL2_ARATH"	"1456.740568,1137.535661,1346.598956,1362.593886,1440.745702,1018.482897,1231.647476,1908.8696955,2689.249485,1474.6944725,1490.689154,1142.62934,1306.676733,1629.788417,1623.78578,1373.5592595,1389.55475733,1014.534574,1308.609828,1152.5096215"	"LVYTNDGGEIVK,DGIDWLEYK,EGQSIGVIPEGIDK"	LFNR1	http://www.uniprot.org/uniprot/Q9FKW6	50.277778
34070280	34836556	37563552	39333352	37099596	33680700	41533576	22957516	37721956	25449620	43250944	41279604	sp|Q9LTT8|VCS_ARATH	Q9LTT8	2	20	16	145718.77	"99.4,99.7,99.7,99.7,99.7,99.7,99.7,99.7,99.7,99.7,99.4,99.7,99.7,99.7,99.7,99.7,99.7,99.7,99.7,99.7"	"DANIQDVNNDPR,DCYPSTEGTFIPGESK | Carbamidomethyl [C2],DHAQQIVNATTNFMSK,ESITSASSVAQALSR,GIAEHTNAAQQR,ISEGSEGEDQPQITGK,LIGEHAVYDVDVR,LQGEIQPQLEVTPITK,LSFPSAEATSQAIVPPNGEPK,NALYAVHLDYGSSPVGTR,NALYAVHLDYGSSPVGTR | Deamidated [N1],QIQAQFQTSGK,QLSNAATGPIGK,SSVESSVIPSFEK,TPSADYSVDR,TVSSAITESFQR,VEAPMDPTTELSR,VFCSQVSNLSTEMAR | Carbamidomethyl [C3],YEESFTSALQR,YGSDPQLVVGR"	sp|Q9LTT8|VCS_ARATH Enhancer of mRNA-decapping protein 4 OS=Arabidopsis thaliana GN=VCS PE=1 SV=1	"sp|Q9LTT8|VCS_ARATH,sp|Q9LTT9|VCR_ARATH"	"1369.621948,1786.772004,1803.85694,1505.76677,1294.635264,1673.774388,1484.7627975,1792.99373,2139.086252,1918.952406,1919.95182,1234.62983,1155.624408,1394.69163,1109.49878,1324.660038,1444.686028,1727.797114,1329.620182,1189.609004"	"SSVESSVIPSFEK,QLSNAATGPIGK,ESITSASSVAQALSR"	VCS	http://www.uniprot.org/uniprot/Q9LTT8	19.568452
337291904	434697344	354517728	377352096	335143104	375493696	389097728	343387680	371744704	336074496	395466848	381883328	sp|Q9SA52|CP41B_ARATH	Q9SA52	1	20	20	42619.253	"99.7,99.7,99.7,99.7,99.7,99.7,99.7,99.7,99.0,99.7,98.6,95.2,99.7,99.7,99.7,99.7,99.7,99.7,99.7,99.7"	"AGGFPEPEIVHYNPK,DLATAFLNVLGNEK,DQHFFASVEK,EADFTTDDMILSK,EADFTTDDMILSK | Oxidation [M9],EAEEVEPILEALPK,EGHQVTLFTR,EIFNISGEK,FIGLFLSR,GKLETESLLQSK,ILIMGGTR,ILIMGGTR | Oxidation [M4],KEADFTTDDMILSK,KEADFTTDDMILSK | Oxidation [M10],LEQYIYCSSAGVYLK | Carbamidomethyl [C7],LETESLLQSK,QLPGESDQDFADFSSK,SDILPHCEEDAVDPK | Carbamidomethyl [C7],SSLSAEGFDVVYDINGR,YVTFDGLAK"	"sp|Q9SA52|CP41B_ARATH Chloroplast stem-loop binding protein of 41 kDa b, chloroplastic OS=Arabidopsis thaliana GN=CSP41B PE=1 SV=1"	sp|Q9SA52|CP41B_ARATH	"1653.8156895,1503.795274,1206.56663075,1484.669983,1500.664416,1565.8197755,1186.6095755,1035.523908,951.554084,1331.729431,859.495264,875.489764,1612.7650225,1628.760297,1792.87071933,1146.613432,1769.773876,1723.77082,1827.8665595,1012.523526"	"EIFNISGEK,LETESLLQSK,YVTFDGLAK"	CSP41B	http://www.uniprot.org/uniprot/Q9SA52	49.206349
65342232	52678884	63137528	53647328	47602004	51824580	60932576	59244740	61394160	48449240	46780280	53622420	sp|Q9SD76|PHS2_ARATH	Q9SD76	1	20	20	95158.084	"99.0,99.7,99.7,99.7,99.1,99.7,98.5,99.0,99.7,98.3,99.7,99.2,99.7,99.7,99.7,99.7,99.7,99.4,98.9,99.7"	"AATSLPEK,ANPEADDATEIAGNIVYHAK,AQQICTVLYPGDATENGK | Carbamidomethyl [C5],DAALGNGGLGR,EDGLFKPDPR,FCSPELSDIITK | Carbamidomethyl [C2],FSPWEIVR,HDVVFPVR,HMEIIEEIDK,HMEIIEEIDK | Oxidation [M2],ISSLSILDNNPQKPVVR,MANLCVVSSHTVNGVAQLHSDILK | Carbamidomethyl [C5],QFADNEELQSEWASAK,QTYYLSMEYLQGR,QTYYLSMEYLQGR | Oxidation [M7],TLGYELEEIAEQEK,VAVQMNDTHPTLAIPELMR | Oxidation [M18],VAVQMNDTHPTLAIPELMR | Oxidati…	"sp|Q9SD76|PHS2_ARATH Alpha-glucan phosphorylase 2, cytosolic OS=Arabidopsis thaliana GN=PHS2 PE=1 SV=1"	sp|Q9SD76|PHS2_ARATH	"815.438716,2097.997204,1963.929895,999.50924,1172.582148,1408.689896,1032.539104,967.5238035,1255.611296,1271.605622,1879.0517145,2592.31538,1851.8281615,1650.76828,1666.76553,1650.7990945,2151.083406,2167.076292,1064.51182,1074.5500615"	"ISSLSILDNNPQKPVVR,FCSPELSDIITK | Carbamidomethyl [C2],HDVVFPVR"	PHS2	http://www.uniprot.org/uniprot/Q9SD76	26.753864
5.91597e+06	6.69842e+06	6.47104e+06	5876527	5170069	6008659	6.15172e+06	4884992	7.15873e+06	5431548	7119037	6.58751e+06	sp|Q9SYP1|DEXHC_ARATH	Q9SYP1	1	20	20	247101.82	"99.7,94.8,99.7,96.3,99.7,99.7,99.7,99.7,99.7,98.9,99.7,99.7,96.1,99.6,99.7,99.7,99.7,97.9,96.5,98.8"	"ADLIHSAATILDK,AENILLCAPTGAGK | Carbamidomethyl [C7],ALVAEVVGNLSNR,ALYEIVLK,ANSSLVLTTDNRPR,DSMLLQLPHFTK,EESVLTDTDDAVYQPK,EIEETQIIVTTPEK,ELSGDQSLTGR,GYDEVHVPWVSK,IENHEFDQLVSIGK,IVALSTSLANAK,LDFTAPSEPGEK,LFSLSDEFK,LITDFQEGGDSGGGR,LKDYGVIVR,NPNYEILYQDFK,NPTLYGLAPDALAK,VYDTALFK,YISSQVINK"	sp|Q9SYP1|DEXHC_ARATH DExH-box ATP-dependent RNA helicase DExH12 OS=Arabidopsis thaliana GN=EMB1507 PE=2 SV=1	sp|Q9SYP1|DEXHC_ARATH	"1366.745181,1413.728052,1340.7408285,947.568834,1542.812031,1428.744795,1808.833482,1628.850136,1161.561348,1414.688226,1627.819632,1186.692428,1289.616188,1084.543906,1507.690307,1061.623125,1542.73502,1442.776356,955.50221,1050.570928"	"IVALSTSLANAK,LITDFQEGGDSGGGR,ANSSLVLTTDNRPR"	EMB1507	http://www.uniprot.org/uniprot/Q9SYP1	11.100875
17410364	13952230	13295125	11089570	21936408	10569434	13246152	11979427	8620468	17537576	11701723	11551604	sp|F4ICX9|TSA1_ARATH	F4ICX9	1	19	19	84374.757	"99.7,99.7,99.7,99.7,99.7,97.4,97.0,99.7,99.0,99.7,99.7,99.7,99.7,99.7,97.6,99.7,99.7,99.7,99.7"	"ANDFSEGNNNEEQSAK,ASDSTADNNEEEHAAK,DDDEELSAHR,DYQDSVNALQGK,EATQSAEIIWVK,GQSLLEEIER,IILEEMER | Oxidation [M6],LAQEGDALFVK,NLEEESAK,QDEDSSIVIPTK,QLNDFTEGSADDEQSAK,QLQVDDSTEDK,QSGSAIPEVLGLGQSGGCSCSK | Carbamidomethyl [C18 C20],QTAVDTHFATAK,SSLLDQIK,TDDVNEGNDEEHSAK,VLTSPSIASSTSESSATSETVETLR,VNDFTGDKDDEEHSAK,VSDSTGSGDDEEQSAK"	sp|F4ICX9|TSA1_ARATH TSK-associating protein 1 OS=Arabidopsis thaliana GN=TSA1 PE=1 SV=1	sp|F4ICX9|TSA1_ARATH	"1752.71765,1687.686315,1185.489408,1336.625656,1373.716254,1172.603062,1047.526752,1189.633532,918.428238,1330.660892,1853.792334,1276.577528,2178.00762,1288.641012,902.506626,1658.660784,2539.249528,1805.7691585,1610.650194"	"QDEDSSIVIPTK,SSLLDQIK,LAQEGDALFVK"	TSA1	http://www.uniprot.org/uniprot/F4ICX9	33.860343
897784192	779312576	860118784	774291840	720425152	774683904	848908928	818485376	832823744	825806592	770371840	844555264	sp|P23321|PSBO1_ARATH	P23321	2	19	8	35141.942	"99.7,99.7,99.0,99.7,99.7,99.7,99.7,99.0,99.7,99.7,99.7,99.7,99.7,99.7,99.7,99.7,99.7,99.7,99.0"	"EEDGIDYAAVTVQLPGGER,FCFEPTSFTVK | Carbamidomethyl [C2],GDEEELVK,GDEEELVKENVK,GGSTGYDNAVALPAGGR,GGSTGYDNAVALPAGGR | Deamidated [N8],GGSTGYDNAVALPAGGRGDEEELVK,GSSFLDPK,GTGTANQCPTIDGGSETFSFKPGK | Carbamidomethyl [C8],GTGTANQCPTIDGGSETFSFKPGK | Carbamidomethyl [C8] Deamidated [Q7],KFCFEPTSFTVK | Carbamidomethyl [C3],LTYDEIQSK,LTYTLDEIEGPFEVASDGSVNFK,NAPPEFQNTK,NTAASVGEITLK,QLDASGKPDSFTGK,RLTYDEIQSK,…	"sp|P23321|PSBO1_ARATH Oxygen-evolving enhancer protein 1-1, chloroplastic OS=Arabidopsis thaliana GN=PSBO1 PE=1 SV=2"	"sp|P23321|PSBO1_ARATH,sp|Q9S841|PSBO2_ARATH"	"2017.961521,1361.633718,917.434368,1387.683385,1561.74584757,1562.727604,2461.171965,849.423343,2456.12667,2457.104949,1489.727534,1095.54516,2530.209204,1144.550572,1202.648224,1449.71037133,1251.6456775,2603.3016045,949.564104"	"QLDASGKPDSFTGK,GDEEELVK,GTGTANQCPTIDGGSETFSFKPGK | Carbamidomethyl [C8]"	PSBO1	http://www.uniprot.org/uniprot/P23321	58.433735
200576800	193168096	204549152	214342896	182900240	214567216	210414896	217997088	222806608	212158432	186907568	220473312	sp|P31414|AVP1_ARATH	P31414	1	19	19	80819.004	"99.7,99.7,99.7,99.7,99.7,99.0,99.0,98.9,99.7,99.7,99.7,99.7,99.0,99.7,99.7,98.8,99.7,98.9,99.7"	"AADVGADLVGK,AAVIGDTIGDPLK,AGIHTVDVLTPK,DTSGPSLNILIK,ERTDALDAAGNTTAAIGK,IATYANAR,ISTDASIK,KYIEAGVSEHAK,LTSDLGASSSGGANNGK,LTSDLGASSSGGANNGK | Deamidated [N15],NGYGDYLIEEEEGVNDQSVVAK,NGYGDYLIEEEEGVNDQSVVAK | Deamidated [N1],NIPEDDPR,QFNTIPGLMEGTAKPDYATCVK | Carbamidomethyl [C20],QFNTIPGLMEGTAKPDYATCVK | Carbamidomethyl [C20] Oxidation [M9],SVGSAALK,TDALDAAGNTTAAIGK,VGGGIYTK,YIEAGVSEHAK"	sp|P31414|AVP1_ARATH Pyrophosphate-energized vacuolar membrane proton pump 1 OS=Arabidopsis thaliana GN=AVP1 PE=1 SV=1	sp|P31414|AVP1_ARATH	"1014.53495633,1268.697342,1249.703202,1256.696794,1773.8858155,878.460704,833.449522,1330.687446,1534.71610686,1535.703566,2427.106398,2428.09438963,954.440978,2440.1781135,2456.17131,731.41769,1488.741638,793.432106,1202.5908975"	"AAVIGDTIGDPLK,AADVGADLVGK,ISTDASIK"	AVP1	http://www.uniprot.org/uniprot/P31414	23.246753
506474560	533222208	592861760	498764192	499608960	483421824	597430912	529017632	550415104	523017664	502553056	595201024	sp|P46283|S17P_ARATH	P46283	1	19	19	42413.882	"99.7,99.7,99.7,99.7,99.7,99.7,99.7,99.7,99.0,98.4,99.7,99.0,99.7,99.7,99.7,99.0,99.0,99.7,99.7"	"ATFDNSEYSK,ETTEIAEGK,FEETLYGTSR,GFPGTHEFLLLDEGK,GIFTNVTSPTAK,LLFEALQYSHVCK | Carbamidomethyl [C12],LTGITGGDQVAAAMGIYGPR,LTGITGGDQVAAAMGIYGPR | Oxidation [M14],MFSPGNLR,MFSPGNLR | Oxidation [M1],TASCGGTACVNSFGDEQLAVDMLADK | Carbamidomethyl [C4 C9] Oxidation [M22],TIINLDDR,TLLMCMGEALR | Carbamidomethyl [C5] Oxidation [M4 M6],TLLMCMGEALR | Carbamidomethyl [C5] Oxidation [M4],TLLMCMGEALR | Carbamido…	"sp|P46283|S17P_ARATH Sedoheptulose-1,7-bisphosphatase, chloroplastic OS=Arabidopsis thaliana GN=At3g55800 PE=2 SV=1"	sp|P46283|S17P_ARATH	"1160.497721,976.470612,1201.560885,1658.831784,1234.655759,1606.817127,1946.98855567,1962.9837125,920.454108,936.449587,2732.17317467,958.508922,1325.6142275,1309.61936,1309.618116,852.432994,893.522168,1632.855409,1648.8497275"	"TIINLDDR,FEETLYGTSR,GIFTNVTSPTAK"	At3g55800	http://www.uniprot.org/uniprot/P46283	44.020356
1619650816	1472745600	1670680320	1439369984	1380915584	1569829632	1669597824	1517936256	1561831552	1616137088	1645789056	1615289600	sp|P56778|PSBC_ARATH	P56778	1	19	19	51867.122	"97.9,99.0,99.7,99.7,99.0,97.9,99.7,94.8,99.7,99.7,99.7,99.7,99.7,99.7,99.7,99.7,99.7,99.7,99.7"	"AAAAGFEK,APWLEPLR,DFEPVLSMTPLN,DFEPVLSMTPLN | Oxidation [M8],DIQPWQER,DIQPWQER | Deamidated [Q3],DQETTGFAWWAGNAR,DQETTGFAWWAGNAR | Deamidated [Q2],GPNGLDLSR,GPNGLDLSR | Deamidated [N3],ITNLTLSPSVIFGYLLK,KDIQPWQER,LGANVGSAQGPTGLGK,LGANVGSAQGPTGLGK | Deamidated [N4],LGANVGSAQGPTGLGK | Deamidated [Q9],SAEYMTHAPLGSLNSVGGVATEINAVNYVSPR,SAEYMTHAPLGSLNSVGGVATEINAVNYVSPR | Oxidation [M5],SPTGEVIFGGETMR,…	sp|P56778|PSBC_ARATH Photosystem II CP43 reaction center protein OS=Arabidopsis thaliana GN=psbC PE=1 SV=3	sp|P56778|PSBC_ARATH	"763.386198,980.545016,1361.653222,1377.649161,1070.51508,1071.49881,1708.76020367,1709.756672,927.47782,928.461933,1878.0885235,1198.6092545,1425.757478,1426.740112,1426.741038,3303.6237705,3319.623231,1479.7023435,1495.69710267"	"APWLEPLR,LGANVGSAQGPTGLGK,DIQPWQER"	psbC	http://www.uniprot.org/uniprot/P56778	29.598309
90028344	67819696	74660944	74353440	66067476	70218944	79622192	67130288	83916072	123121624	117974440	89505384	sp|P56798|RR3_ARATH	P56798	1	19	19	25188.137	"99.7,99.6,99.3,99.7,99.6,99.7,99.3,99.0,99.6,99.7,99.7,99.0,99.7,97.7,98.4,99.7,99.7,99.7,99.7"	"AIELTEQANTK,GIQVQIAGR,IDYCSYTVR | Carbamidomethyl [C4],ISNPYGDPNILAEFIAGQLK,ISSGMEGIAR,ISSGMEGIAR | Oxidation [M5],KAIELTEQANTK,KLNIAITR,KYSEGLEEDK,KYSEGLEEDKK,LGTTQSHHSLWFAQPK,LLIEDKPR,RVEELQMNVQK,RVEELQMNVQK | Oxidation [M7],TIYGVLGIK,VEELQMNVQK,VPLQTIEAK,YSEGLEEDK,YSEGLEEDKK"	"sp|P56798|RR3_ARATH 30S ribosomal protein S3, chloroplastic OS=Arabidopsis thaliana GN=rps3 PE=3 SV=1"	sp|P56798|RR3_ARATH	"1216.629089,940.545194,1175.527528,2159.1256555,1019.5072,1035.501998,1344.724966,927.586845,1196.555996,1324.6490485,1836.925704,982.581695,1372.7122595,1388.709132,962.580198,1216.611064,997.580608,1068.461842,1196.555773"	"VPLQTIEAK,GIQVQIAGR,ISSGMEGIAR"	rps3	http://www.uniprot.org/uniprot/P56798	60.550459
81938072	74720624	66556668	143260368	131854032	125661848	69013800	68842800	73817808	91798736	98256424	103999760	sp|Q38814|THI4_ARATH	Q38814	1	19	19	36663.843	"99.7,99.7,99.7,99.7,99.7,99.7,99.7,97.9,99.7,99.7,99.7,99.7,99.5,99.7,99.7,99.7,96.7,99.7,98.6"	"ALDMNTAEDAIVR,ALDMNTAEDAIVR | Oxidation [M4],EVVPGMIVTGMEVAEIDGAPR | Oxidation [M6 M11],HAALFTSTIMSK,HAALFTSTIMSK | Oxidation [M10],IVVSSCGHDGPFGATGVK | Carbamidomethyl [C6],LFNAVAAEDLIVK,LLARPNVK,MGPTFGAMMISGQK,MGPTFGAMMISGQK | Oxidation [M1 M8],MGPTFGAMMISGQK | Oxidation [M1 M9],MGPTFGAMMISGQK | Oxidation [M8 M9],MGPTFGAMMISGQK | Oxidation [M8],MGPTFGAMMISGQK | Oxidation [M9],SIGMIDHVPGMK,SIGM…	"sp|Q38814|THI4_ARATH Thiamine thiazole synthase, chloroplastic OS=Arabidopsis thaliana GN=THI1 PE=1 SV=1"	sp|Q38814|THI4_ARATH	"1417.687305,1433.680861,2201.0717655,1305.674835,1321.6709475,1786.8673215,1401.78647,909.575961,1454.670422,1486.66147,1486.661834,1486.66097,1470.664816,1470.664044,1283.636727,1299.63081025,1315.625328,1299.629952,3192.493027"	"ALDMNTAEDAIVR,IVVSSCGHDGPFGATGVK | Carbamidomethyl [C6],ALDMNTAEDAIVR | Oxidation [M4]"	THI1	http://www.uniprot.org/uniprot/Q38814	40.114613
147454336	116014864	145507600	159428832	156352224	145228400	126677656	97261976	132087504	135883856	136726912	151695376	sp|Q43316|HEM3_ARATH	Q43316	1	19	19	41042.802	"99.7,99.0,99.7,99.7,98.4,99.2,96.7,98.0,99.7,99.7,99.7,99.7,99.7,99.6,99.7,99.7,99.5,99.7,99.7"	"AFLETLDGSCR | Carbamidomethyl [C10],AGPGFFGN,DAGQELLSR,DEEGNCIFR | Carbamidomethyl [C6],DVPTYLPEK,EIDEALINGHIDIAVHSMK,GLVASPDGTK,GPYVYEDMVK,GSPLALAQAYETR,HPELVEDGAIHIEIIK,ILSQPLADIGGK,KGPYVYEDMVK,KGPYVYEDMVK | Oxidation [M9],KHPELVEDGAIHIEIIK,MATYLASLNHEETR,MATYLASLNHEETR | Oxidation [M1],TILPCNLPR | Carbamidomethyl [C5],TPIAGYASK,YPALHVEENFR"	"sp|Q43316|HEM3_ARATH Porphobilinogen deaminase, chloroplastic OS=Arabidopsis thaliana GN=HEMC PE=1 SV=1"	sp|Q43316|HEM3_ARATH	"1267.58706,765.344707,987.49854,1138.471016,1060.544474,2104.063412,943.497378,1199.552784,1375.70922,1811.978319,1210.692674,1327.646355,1343.643115,1940.0722,1634.7723255,1650.7708335,1082.590878,906.4808,1373.672372"	"ILSQPLADIGGK,DAGQELLSR,TILPCNLPR | Carbamidomethyl [C5]"	HEMC	http://www.uniprot.org/uniprot/Q43316	44.764398
10005997	13110656	12714372	11391937	10948268	11434769	11979204	9206799	10492517	11285512	12018049	11538253	sp|Q6ZY51|PWD_ARATH	Q6ZY51	2	19	8	131320.964	"99.7,99.3,99.3,99.7,99.7,99.7,99.7,99.7,99.7,99.7,99.4,99.0,99.6,99.7,99.7,99.7,99.7,99.7,99.7"	"AEFTAAVPLTR,AGIIFQISK,DATPEEVLVAR,ETLDLPQEVGNDDDVGDGGHER,FLNALETMGGADQLAK,FLNALETMGGADQLAK | Oxidation [M8],IHPCLPSFK | Carbamidomethyl [C4],IVFVTCDDDDK | Carbamidomethyl [C6],LDTSGESSNVLELIK,LEASPSHVNLILSTEGR,LGSVGFFLER,LTVDSVFR,NAGPEDLIATEAMLQR | Oxidation [M13],NDGSLSWESGDNR,SAACGLLASLAEASSK | Carbamidomethyl [C4],SLSIDDEESKPGSSSSNSLLYSSK,VHSEHGVPASFK,VVGSENGAQLQK,YSGDFVEQFK"	"sp|Q6ZY51|PWD_ARATH Phosphoglucan, water dikinase, chloroplastic OS=Arabidopsis thaliana GN=GWD3 PE=1 SV=1"	"tr|B3H4K8|B3H4K8_ARATH,sp|Q6ZY51|PWD_ARATH"	"1174.634644,975.57559,1198.619022,2366.029258,1677.83802,1693.836326,1097.569671,1325.58096,1603.829316,1821.9582545,1123.603396,935.507764,1743.84517,1435.596398,1534.767162,2516.1778435,1293.647595,1228.640758,1218.55562"	"LDTSGESSNVLELIK,FLNALETMGGADQLAK,LTVDSVFR"	GWD3	http://www.uniprot.org/uniprot/Q6ZY51	20.234114
16649326	14712918	17761416	16825952	14718845	14974515	17353880	14983075	17585796	13774765	16085743	17201992	sp|Q9C522|ACLB1_ARATH	Q9C522	2	19	6	65812.909	"99.7,99.7,99.7,99.7,99.0,99.7,99.7,99.6,99.7,99.7,99.7,98.4,99.7,99.3,99.7,99.7,99.7,99.7,99.1"	"APTHIISTISDDR,DLVSSLVSGLLTIGPR,ETPSVAGIINPGSEGFQK,FGGAIDDAAR,FNNIPQIK,IGDTAGTIDNIIQCK | Carbamidomethyl [C14],LYRPGSVGFVSK,MVVVLGELGGR,SAAASSMAALK,SAAASSMAALK | Oxidation [M7],SEVQFGHAGAK,SGGEMESAQAK,SGGMSNEMYNTIAR,SGGMSNEMYNTIAR | Oxidation [M4],SGGMSNEMYNTIAR | Oxidation [M8],SIGLIGHTFDQK,VIIGPATVGGVQAGAFK,VTKPVVAWVSGTCAR | Carbamidomethyl [C13],VVAIIAEGVPESDTK"	sp|Q9C522|ACLB1_ARATH ATP-citrate synthase beta chain protein 1 OS=Arabidopsis thaliana GN=ACLB-1 PE=2 SV=1	"sp|Q9FGX1|ACLB2_ARATH,sp|Q9C522|ACLB1_ARATH"	"1424.726058,1625.9386585,1829.91619,991.47203,972.539378,1617.803831,1308.718848,1128.632336,1006.512358,1022.506568,1129.5516525,1093.469126,1529.66031,1545.654964,1545.655524,1314.693276,1583.9043505,1629.8666855,1526.819966"	"VIIGPATVGGVQAGAFK,VTKPVVAWVSGTCAR | Carbamidomethyl [C13],SGGMSNEMYNTIAR"	ACLB	http://www.uniprot.org/uniprot/Q9C522	34.375
15334838	16802924	17332736	16629524	15825137	15843163	15721548	11402932	15028720	13568268	14465931	17853944	sp|Q9M8D3|PUR4_ARATH	Q9M8D3	1	19	19	153951.884	"97.1,95.6,99.0,99.7,98.0,97.1,98.4,99.7,99.6,99.7,99.7,99.7,99.7,99.7,99.6,99.0,99.7,99.7,99.7"	"ACGLDEVTR | Carbamidomethyl [C2],ACIEMGEK | Carbamidomethyl [C2],AGPSPWLK,APGNLVISAYVTCPDITK | Carbamidomethyl [C13],ASGNWMYAAK,DMWEDTSFQLEK,DMWEDTSFQLEK | Oxidation [M2],DPTNVELFDIAQSNSEHSR,EIIYPQGAEIDIR,GMEGSTLGVWAAHGEGR,LASCVEMEK | Carbamidomethyl [C4] Oxidation [M7],LGGDDGILLHVDLAK,LSFIPSSTNNNYMSQDVKPK | Oxidation [M13],MTECVYTQK | Carbamidomethyl [C4],MTECVYTQK | Carbamidomethyl [C4] Oxidat…	"sp|Q9M8D3|PUR4_ARATH Probable phosphoribosylformylglycinamidine synthase, chloroplastic/mitochondrial OS=Arabidopsis thaliana GN=At1g74260 PE=2 SV=3"	sp|Q9M8D3|PUR4_ARATH	"1019.470864,936.404506,854.465104,1917.986592,1097.496976,1527.655174,1543.648644,2157.99249,1515.791594,1713.7893715,1081.478334,1534.836822,2285.099337,1158.504594,1174.498858,877.466134,1991.984598,2314.090992,1523.854738"	"AGPSPWLK,VPLIQESANAELLK,NPIISIHDQGAGGNCNVVK | Carbamidomethyl [C15]"	At1g74260	http://www.uniprot.org/uniprot/Q9M8D3	14.8543
88701872	93562728	97854712	95647072	87546560	94469912	94847184	83968960	92650136	79147328	80759856	103776816	sp|Q9SCY0|PGMP_ARATH	Q9SCY0	1	19	19	67988.047	"99.7,99.0,99.7,99.0,99.7,99.4,99.7,99.0,99.7,99.7,99.7,99.7,99.7,99.7,99.2,99.7,92.8,99.7,99.7"	"ANGGFIMSASHNPGGPEYDWGIK | Oxidation [M7],DLVDVMYR,DNGPDFGAASDGDGDR,EASQIIIK,EGILSTPAVSAVIR,FFGNLMDAGK,FNYSSGQPAPETITDK,FVFTDGSR,IAAGNGVGQILVGK,IAAGNGVGQILVGK | Deamidated [N5],IYGNTLSISEIK,IYIEQFEPDVSK,LSGTGSAGATVR,LSICGEESFGTGSDHIR | Carbamidomethyl [C4],LVSVADVVK,SLPTKPIEGQK,SMPTSGALDR,VAEIPDIDLSQVGVTK,YDYEECESEGANK | Carbamidomethyl [C6]"	"sp|Q9SCY0|PGMP_ARATH Phosphoglucomutase, chloroplastic OS=Arabidopsis thaliana GN=PGMP PE=1 SV=2"	sp|Q9SCY0|PGMP_ARATH	"2420.083842,1009.490462,1564.603351,900.52771,1411.80343,1098.51692,1753.815663,927.445042,1295.7559255,1296.739319,1336.722622,1466.728624,1075.562392,1863.83997,928.559874,1196.676131,1033.486734,1682.909298,1592.59324"	"LVSVADVVK,IAAGNGVGQILVGK,IYGNTLSISEIK"	PGMP	http://www.uniprot.org/uniprot/Q9SCY0	36.757624
115351520	112015376	120663752	138103216	112147472	143035152	122589584	107409144	132101992	121092016	118579960	130718456	sp|Q9SF40|RL4A_ARATH	Q9SF40	4	19	0	44701.609	"99.7,99.7,99.7,99.4,99.7,99.7,99.7,99.7,99.7,99.7,99.7,99.7,99.7,99.0,99.7,99.7,99.7,99.7,99.7"	"AGHQTSAESWGTGR,AGQAAFGNMCR | Carbamidomethyl [C10],AGQAAFGNMCR | Carbamidomethyl [C10] Oxidation [M9],GPLVVYGTEGSK,HAIVSAIAATAVPALVMAR | Oxidation [M17],IENVPEMPLVVSDSAEAVEK,IENVPEMPLVVSDSAEAVEK | Oxidation [M7],IINSDEIQSVVNPIK,IINSDEIQSVVNPIKK,KGPLVVYGTEGSK,LAPGGHLGR,LESIYGSFEKPSEK,MSLLAEAQR,MVNADLAR | Oxidation [M1],NSIGIRPGK,NSIGIRPGK | Deamidated [N1],QIGAYDDAEK,TMISDSDYTEFDNFTK,TMISDSDYTEFD…	sp|Q9SF40|RL4A_ARATH 60S ribosomal protein L4-1 OS=Arabidopsis thaliana GN=RPL4A PE=2 SV=1	"tr|F4KDU5|F4KDU5_ARATH,tr|Q2V3X4|Q2V3X4_ARATH,sp|P49691|RL4B_ARATH,sp|Q9SF40|RL4A_ARATH"	"1443.649312,1181.506658,1197.50132,1205.630036,1877.056638,2155.07292,2171.066874,1667.909571,1796.0043425,1333.7238495,876.492778,1612.7990555,1017.528696,904.442965,940.5451265,941.529021,1108.503522,1912.803479,1928.799478"	"LESIYGSFEKPSEK,AGHQTSAESWGTGR,NSIGIRPGK"	RPL4A	http://www.uniprot.org/uniprot/Q9SF40	41.37931
22196852	25321992	22432172	25953600	25727324	26084892	22615032	19572656	24887572	17301380	24118364	24519384	sp|Q9SHI1|IF2C_ARATH	Q9SHI1	1	19	19	109745.794	"99.7,99.7,97.2,99.7,99.7,99.7,99.7,99.7,99.7,99.7,99.6,99.6,99.7,99.0,98.5,99.7,99.0,99.7,99.7"	"AAAVPIVIAINK,ALFDHSGER,ATFSSGSGR,DYDVEVLDADSVK,GLGVNTAPWSK,GPFATFIVQK,GVDPAASQAVLAPTKPGK,IVAEDDGDDDASISR,LEIPKPGNK,LQSCVFLDTPGHEAFGAMR | Carbamidomethyl [C4],NGSYANASDGGTR | Deamidated [N1],QALQVLPQENVTLK,QTFDEEDLDK,TTLLDYIR,TVHVGVLDSLK,VAASEAGGITQGIGAYK,VDVQGSIEAVR,VIYELIDDVR,VTLSSLASAVSAK"	"sp|Q9SHI1|IF2C_ARATH Translation initiation factor IF-2, chloroplastic OS=Arabidopsis thaliana GN=At1g17220 PE=2 SV=2"	sp|Q9SHI1|IF2C_ARATH	"1178.738404,1030.4834875,868.403416,1466.676798,1128.592598,1106.61191,1705.9356365,1576.684558,994.581003,2134.991769,1269.520724,1579.895004,1238.529646,993.549626,1166.665584,1591.8200065,1171.618292,1233.66032,1232.696944"	"AAAVPIVIAINK,VTLSSLASAVSAK,VAASEAGGITQGIGAYK"	At1g17220	http://www.uniprot.org/uniprot/Q9SHI1	22.612086
186147760	139459312	214047728	215318176	161709568	200367552	190833040	155299840	204297936	180072400	195554208	225512144	sp|Q9STF2|PTA16_ARATH	Q9STF2	1	19	19	54357.617	"99.7,99.7,99.6,99.7,99.7,99.7,99.0,99.7,99.7,99.5,99.7,99.7,99.6,99.7,99.7,99.0,97.8,99.7,99.0"	"ADAVGVTVDGLFNK,AGVPDLGAAQDLAR,DISSGLSWNK,DPGTIFVAGATGQAGIR,EAEAASLAEDAQQK,GKNPFQFDFGK,IAQTLLQR,ILSNDEVKR,KDPGTIFVAGATGQAGIR,KVYADAIAR,LGSQFATAIQNASETPK,LNAVQSPFQDAESIAK,NPFQFDFGK,QETIYIDDD,QRPSSPFASKPK,QTAFQLGK,SQPLTISDLIEK,VAQTDVAYTLIK,VYADAIAR"	"sp|Q9STF2|PTA16_ARATH Protein plastid transcriptionally active 16, chloroplastic OS=Arabidopsis thaliana GN=PTAC16 PE=1 SV=1"	sp|Q9STF2|PTA16_ARATH	"1404.72323,1352.704068,1105.54022,1629.846952,1459.679048,1283.6293345,941.566316,1072.5876685,1757.941089,1005.56016,1761.884937,1716.8672965,1098.51414,1110.472753,1328.719803,891.480956,1342.73358,1320.728522,877.465672"	"SQPLTISDLIEK,VAQTDVAYTLIK,AGVPDLGAAQDLAR"	PTAC16	http://www.uniprot.org/uniprot/Q9STF2	37.843137
12810232	12617970	12688158	12804860	14385496	16338922	12984258	14932184	14372982	14963692	9713155	13716781	tr|F4K1G7|F4K1G7_ARATH	F4K1G7	1	19	19	105046.401	"99.7,96.9,99.7,98.6,98.5,95.4,99.7,99.7,99.7,99.7,99.7,99.5,99.7,99.3,99.7,99.3,97.8,99.7,99.7"	"ALEGGLGVSLLER,ALNQNGDPLGR,CILSGDPCQLAPVVLSR | Carbamidomethyl [C1 C8],DDVLAAGIR,DVLQDLER,EVITLAVQQGER,GAGATACTQGFVHNLGEDGCSIGVALESR | Carbamidomethyl [C7 C20],HVAVVCDSSTICHNTFLAR | Carbamidomethyl [C6 C12],IHGLADALTYER,MNDVIAGWASK,MPYGSLSVGCEER | Carbamidomethyl [C10] Oxidation [M1],NCEALMLLQK | Carbamidomethyl [C2],NDNTESESLSVVEEPK,RPVMIVQGPPGTGK,SAPSVASHLLIDSPFVK,SLGEIVNSK,SNNLGAVGFLGDSR,VLVTA…	tr|F4K1G7|F4K1G7_ARATH P-loop containing nucleoside triphosphate hydrolases superfamily protein OS=Arabidopsis thaliana GN=At5g35970 PE=4 SV=1	tr|F4K1G7|F4K1G7_ARATH	"1312.73448,1153.585498,1883.97442,928.497938,986.50365,1341.725194,2933.342523,2186.036088,1357.69866,1190.57415,1499.637974,1218.611566,1775.805746,1435.79716,1766.9569565,945.51307,1405.684516,1770.9177905,1786.913932"	"DDVLAAGIR,NCEALMLLQK | Carbamidomethyl [C2],SLGEIVNSK"	At5g35970	http://www.uniprot.org/uniprot/F4K1G7	26.118626
25346472	33490988	30850376	28286572	26650732	30046692	29872016	26779832	29079220	23731652	26471480	25148920	tr|Q8H126|Q8H126_ARATH	Q8H126	1	19	19	71097.086	"99.7,99.7,99.7,99.0,99.7,99.7,99.0,99.7,99.7,99.7,99.7,99.7,99.7,98.5,97.1,99.7,99.7,99.7,99.0"	"AITLGEVLNSK,ALCLLTTGQNVTR | Carbamidomethyl [C3],ANPNTPENELLKPLK,AVLLDIGK,DLQNQSLGAVDEGVK,DLQNQSLGAVDEGVK | Deamidated [Q3],EANYAMER,EFLCSETMHCLGIPTTR | Carbamidomethyl [C4 C10],FADGLAVLR,FGSYQIHASR,FMDEYQAIMSK,KLEDFNWDHSFVK,LEDFNWDHSFVK,LLNNMSVDK,RPYEEQPGMEK | Oxidation [M9],SYIQEVGGSEVSDEER,TGDEDDSVVDLTSNK,TLAVAQLINQK,VDYTNFFR"	tr|Q8H126|Q8H126_ARATH Putative uncharacterized protein At5g13030 OS=Arabidopsis thaliana GN=At5g13030 PE=1 SV=1	tr|Q8H126|Q8H126_ARATH	"1143.648952,1445.766244,1676.909454,827.511222,1571.778852,1572.760706,982.41745,2050.926156,960.539664,1164.566568,1361.598134,1663.802748,1535.704311,1032.527774,1378.616259,1782.789622,1593.699566,1197.707398,1060.498196"	"TLAVAQLINQK,AVLLDIGK,AITLGEVLNSK"	At5g13030	http://www.uniprot.org/uniprot/Q8H126	31.595577
26790460	40193556	40619048	48819524	45967760	47607824	41316040	36269540	39688916	39241256	28412164	42279400	sp|F4I116|SYLC_ARATH	F4I116	1	18	18	123449.771	"99.7,96.5,99.7,96.3,99.7,99.5,99.7,99.7,99.7,99.7,99.7,99.7,92.7,99.7,99.7,99.5,98.5,99.7"	"AALNLAYQNFSK,AGGQVYQWEIMR | Oxidation [M11],ATGEGVQPQEYTLIK,DEAISIGTQALNLR,EIEQFGNPPVFTAEDTTK,GAQVTAVPEGK,KGAQVTAVPEGK,LIETGEAIIYSEPEKPVMSR,LIETGEAIIYSEPEKPVMSR | Oxidation [M18],LPFGEIEVLQSNK,MEVVKPFPLK,MNLYSDETR,QSIEEFSATGTR,SFGLTDSEIANFR,VFENDMNIALR,WWEDEDVFR,YLQDSIVLMR,YTIFSPLDGQPCADHDR | Carbamidomethyl [C12]"	"sp|F4I116|SYLC_ARATH Leucine--tRNA ligase, cytoplasmic OS=Arabidopsis thaliana GN=At1g09620 PE=1 SV=1"	sp|F4I116|SYLC_ARATH	"1338.690806,1452.679282,1632.834638,1499.799591,2021.95696,1055.560208,1183.65596,2261.16069,2277.154098,1472.7862675,1186.679133,1127.491642,1324.616762,1455.699528,1320.647902,1280.54697,1236.655468,1990.88694"	"QSIEEFSATGTR,LPFGEIEVLQSNK,SFGLTDSEIANFR"	At1g09620	http://www.uniprot.org/uniprot/F4I116	18.973419
23717316	31589588	30501040	32129832	25568596	30042908	29288964	24383600	34844128	24252412	27121156	31582524	sp|F4JMJ1|HSP7R_ARATH	F4JMJ1	1	18	18	96723.674	"99.7,99.6,95.8,99.7,99.5,97.3,99.7,99.0,99.7,99.7,99.7,99.7,93.6,99.7,99.7,99.7,99.3,98.2"	"AIGSPISFR,ANLHFSLSR,DMVVSVPPYFGQAER,EILSANTAAPISVESLHDDR,GQSPISVAINEMSK,GQSPISVAINEMSK | Oxidation [M12],IDDISAVELIGGATR,IKLEALDK,LLGEEAAGITAR,LQSTIQEFIGK,LVEHFADEFNK,NNLESYIYATK,SGILSLDR,SLTPLKDVLK,SPALVAFQSGDR,TSLWSKPVFTSTEVYAK,TVSVNQFQVK,WDLGLGGQSMEMR | Oxidation [M10 M12]"	sp|F4JMJ1|HSP7R_ARATH Heat shock 70 kDa protein 17 OS=Arabidopsis thaliana GN=HSP70-17 PE=2 SV=1	sp|F4JMJ1|HSP7R_ARATH	"946.523894,1043.551395,1693.813473,2137.061358,1459.732816,1475.726718,1528.8118025,928.559505,1199.650556,1262.687278,1347.645858,1314.644572,859.476592,1112.680833,1246.632236,1943.00415,1148.61966,1510.653218"	"AIGSPISFR,LLGEEAAGITAR,SGILSLDR"	HSP70	http://www.uniprot.org/uniprot/F4JMJ1	23.644752
11324379	12305798	10610332	12268664	12688794	10384319	10672948	8016429	10670515	8.19538e+06	13348324	11402405	sp|F4KE63|SYVM2_ARATH	F4KE63	1	18	18	110628.092	"95.2,99.7,99.2,94.4,94.4,99.5,99.6,94.1,99.7,99.7,99.7,95.7,99.7,92.6,99.7,98.8,99.2,97.8"	"AEYSVEPVKR,DCEEDYIVAK | Carbamidomethyl [C2],EALIVSPWPQNSLPR,ELTIIPER,EQVEELEEK,FTLDEQLSR,GGEVIEPLVSK,HVPIIADK,IPVWYVVGK,ISPGHDHNDYLLAR,IYNHWLTNIK,LFFGDVGR,LGASCDWSR | Carbamidomethyl [C5],LGLPILNVMNK | Oxidation [M9],QWFVHMDPLAEK,SAEEALEK,SLGNVIDPLDTIK,YVGQTAIVPMTYGR | Oxidation [M10]"	"sp|F4KE63|SYVM2_ARATH Valine--tRNA ligase, chloroplastic/mitochondrial 2 OS=Arabidopsis thaliana GN=EMB2247 PE=3 SV=1"	sp|F4KE63|SYVM2_ARATH	"1176.612747,1240.527806,1705.9132245,969.547882,1131.528576,1107.556434,1126.623102,891.517856,1059.611708,1606.784411,1300.693386,909.47136,1050.455806,1226.706084,1499.722545,875.423064,1383.761042,1570.780838"	"GGEVIEPLVSK,LGASCDWSR | Carbamidomethyl [C5],ELTIIPER"	EMB2247	http://www.uniprot.org/uniprot/F4KE63	19.301848
48827712	39802908	46440664	50452292	40260632	44255668	49668364	46617032	47943464	52321352	49712864	48614228	sp|O04499|PMG1_ARATH	O04499	2	18	13	60578.828	"99.7,99.7,98.7,99.7,99.7,99.7,99.7,99.7,99.7,99.0,99.7,99.7,99.7,99.5,99.7,99.7,99.0,99.7"	"AHGTAVGLPSEDDMGNSEVGHNALGAGR,AHGTAVGLPSEDDMGNSEVGHNALGAGR | Oxidation [M14],ALEYEDFDK,ALEYEDFDKFDR,ENGVDAQIASGGGR,GIYVVTADHGNAEDMVK,GIYVVTADHGNAEDMVK | Oxidation [M15],GWDAQVLGEAPHK,HGAPDTWTLIK,IFEGEGFK,KEPGANDQYLPPFVIVDESGK,LCDQALASGK | Carbamidomethyl [C2],LDQLQLLIK,MIFDAIEQVK,MIFDAIEQVK | Oxidation [M1],RGWDAQVLGEAPHK,VHILTDGR,YENDWEVVK"	"sp|O04499|PMG1_ARATH 2,3-bisphosphoglycerate-independent phosphoglycerate mutase 1 OS=Arabidopsis thaliana GN=PGM1 PE=2 SV=3"	"sp|O04499|PMG1_ARATH,sp|Q9M9K1|PMG2_ARATH"	"2718.241248,2734.235535,1128.497002,1546.690531,1329.625722,1817.861493,1833.8562005,1406.694651,1237.645312,925.455076,2302.148256,1061.517374,1082.669808,1192.616156,1208.609718,1562.796111,909.5028975,1180.539652"	"IFEGEGFK,LDQLQLLIK,HGAPDTWTLIK"	PGM1	http://www.uniprot.org/uniprot/O04499	30.70018
17331500	18780352	16835928	21894688	16924308	18802680	17146616	14020847	17271492	17904392	19424072	21085528	sp|O48963|PHOT1_ARATH	O48963	3	18	17	111687.427	"99.7,99.7,99.7,99.1,96.6,97.9,99.7,99.2,99.0,99.7,99.7,99.0,99.1,99.7,95.6,99.7,99.7,99.7"	"AAEWGLVLK,CTNPPELETPIFSGEAENGEK | Carbamidomethyl [C1],DERPESVDDK,DPSPETISK,DSPPWIAIQK,ELPDANMTPEDLWANHSK | Deamidated [N6],ETLAAGNNYCGR | Carbamidomethyl [C10],FIGMQVEVSK | Oxidation [M4],FLQGPETDLTTVK,FLQGSGTDADELAK,GIDLATTLER,INEIPEKK,NVIEETAVK,TAVNIDEAVR,TFTNVLQK,TGKPQGVGVR,TITAEKPQK,VLESGEPIGLK"	sp|O48963|PHOT1_ARATH Phototropin-1 OS=Arabidopsis thaliana GN=PHOT1 PE=1 SV=1	"sp|O48963|PHOT1_ARATH,sp|P93025|PHOT2_ARATH,tr|A8MS49|A8MS49_ARATH"	"985.559846,2318.040352,1188.524292,972.474976,1153.61311,2067.938208,1324.582624,1152.58725,1447.755086,1450.692433,1087.587846,969.549546,1001.53947,1086.567456,949.523904,997.565028,1014.568956,1140.639168"	"VLESGEPIGLK,TAVNIDEAVR,TFTNVLQK"	PHOT1	http://www.uniprot.org/uniprot/O48963	20.180723
122408936	123476768	125586528	110413664	97209744	104258040	107815384	122561872	114431216	115923560	112643776	121956840	sp|P11574|VATB1_ARATH	P11574	4	18	0	54106.937	"99.7,99.7,99.5,99.7,99.7,99.7,92.7,99.7,99.7,99.7,99.7,99.7,99.5,99.0,99.7,99.7,99.7,99.7"	"AVVQVFEGTSGIDNK,DFEENGSMER,DFEENGSMER | Oxidation [M8],DHSDVSNQLYANYAIGK,FTTVQFTGEVLK,FVMQGAYDTR,FVMQGAYDTR | Oxidation [M3],GQVLEVDGEK,GYPGYMYTDLATIYER | Oxidation [M6],IPLFSAAGLPHNEIAAQICR | Carbamidomethyl [C19],KDHSDVSNQLYANYAIGK,RGQVLEVDGEK,SAIGEGMTR | Oxidation [M7],TLDQFYSR,TPVSLDMLGR,TPVSLDMLGR | Oxidation [M7],TVSGVAGPLVILDK,TYPEEMIQTGISTIDVMNSIAR | Oxidation [M6 M17]"	sp|P11574|VATB1_ARATH V-type proton ATPase subunit B1 OS=Arabidopsis thaliana GN=VHA-B1 PE=2 SV=2	"sp|Q8W4E2|VATB3_ARATH,sp|P11574|VATB1_ARATH,sp|Q9SZN1|VATB2_ARATH,tr|F4JTQ0|F4JTQ0_ARATH"	"1562.7945715,1212.471946,1228.466252,1893.885786,1368.72837,1186.544048,1202.537968,1072.540208,1927.866664,2177.139848,2021.981146,1228.6409825,936.431624,1028.49285,1087.570064,1103.56419,1367.8023095,2500.186334"	"TPVSLDMLGR,GQVLEVDGEK,TLDQFYSR"	VHA	http://www.uniprot.org/uniprot/P11574	36.00823
73011976	58088764	58565012	74703120	87314640	78725024	61307244	70007120	64735928	73306344	80509248	68176192	sp|P16127|CHLI1_ARATH	P16127	2	18	9	46269.369	"98.4,99.7,99.7,99.7,99.7,99.7,99.7,99.7,99.1,99.7,99.7,99.7,99.5,99.7,99.6,99.7,99.7,99.7"	"AFEPGLLAK,ANLSSVQIDR,DPLESIDSGVLVSEK,EGISISHPAR,FGMHAQVGTVR,FGMHAQVGTVR | Oxidation [M3],GEQVPVIATK,IGGVMIMGDR,IGGVMIMGDR | Oxidation [M5],INMVDLPLGATEDR,INMVDLPLGATEDR | Oxidation [M3],KDPLESIDSGVLVSEK,LQDQISTAR,TEQDKLQDQISTAR,VCGTIDIEK | Carbamidomethyl [C2],VCSELNVDGLR | Carbamidomethyl [C2],VEKGEQVPVIATK,VTPDDVATVIPNCLR | Carbamidomethyl [C13]"	"sp|P16127|CHLI1_ARATH Magnesium-chelatase subunit ChlI-1, chloroplastic OS=Arabidopsis thaliana GN=CHLI1 PE=1 SV=1"	"sp|Q5XF33|CHLI2_ARATH,sp|P16127|CHLI1_ARATH"	"944.532782,1101.57784,1586.80338,1065.5567175,1201.602444,1217.5972175,1040.586784,1047.520768,1063.516328,1542.76731233,1558.765658,1714.89872,1030.540662,1631.811076,1033.511152,1260.61105,1396.791794,1668.84988"	"LQDQISTAR,ANLSSVQIDR,GEQVPVIATK"	CHLI1	http://www.uniprot.org/uniprot/P16127	33.490566
329757024	356000960	352137824	343046432	306999168	351066464	376763424	377720448	386373024	352324032	333168448	350987008	sp|P25697|KPPR_ARATH	P25697	1	18	18	44463.06	"99.7,99.7,99.7,99.7,99.7,99.7,99.0,99.7,99.7,99.7,95.4,99.7,99.7,97.0,99.7,99.7,99.7,99.7"	"ANDFDLMYEQVK,ANDFDLMYEQVK | Oxidation [M7],DLYEQLIANK,FYGEVTQQMLK,FYGEVTQQMLK | Oxidation [M9],GGNPDSNTLISDTTTVICLDDYHSLDR | Carbamidomethyl [C18],GHSLESIK,HADFPGSNNGTGLFQTIVGLK,ILVIEGLHPMFDER,ILVIEGLHPMFDER | Oxidation [M10],IRDLYEQLIANK,KLTCSYPGIK | Carbamidomethyl [C4],KPDFDAFIDPQK,KPDFDAFIDPQK | Deamidated [Q11],LDELIYVESHLSNLSTK,LTCSYPGIK | Carbamidomethyl [C3],LTSVFGGAAKPPK,NGIAVEKPIYNHVTG…	"sp|P25697|KPPR_ARATH Phosphoribulokinase, chloroplastic OS=Arabidopsis thaliana GN=At1g32060 PE=2 SV=1"	sp|P25697|KPPR_ARATH	"1471.664746,1487.6598055,1205.630207,1342.65997367,1358.652992,2978.354955,869.4604,2172.095718,1667.870937,1683.8644215,1474.811922,1165.6160165,1419.702224,1420.688238,1960.014689,1037.52199767,1271.723589,2951.6125475"	"ANDFDLMYEQVK,LTSVFGGAAKPPK,DLYEQLIANK"	At1g32060	http://www.uniprot.org/uniprot/P25697	46.582278
1168699904	1195619200	1348854400	1362592128	1174553728	1302924544	1354519296	1525120256	1276243584	1661483776	1201605632	1352610560	sp|P56777|PSBB_ARATH	P56777	1	18	18	56036.423	"99.7,99.7,99.7,99.7,99.7,99.7,97.9,99.0,99.7,99.7,99.5,99.7,99.7,99.7,99.7,99.7,99.7,99.7"	"AGSMDNGDGIAVGWLGHPVFR,AGSMDNGDGIAVGWLGHPVFR | Oxidation [M4],AQLGEIFELDR,AQLGEIFELDR | Deamidated [Q2],DVFAGIDPDLDAQVEFGAFQK,LAFYDYIGNNPAK,LAFYDYIGNNPAK | Deamidated [N9],LGDPTTKR,MPTFFETFPVVLVDGDGIVR,MPTFFETFPVVLVDGDGIVR | Oxidation [M1],QGMFVIPFMTR | Oxidation [M3 M9],RAQLGEIFELDR,TGKPSLDLPK,VHTVVLNDPGR,VSAGLAENQSLSEAWAK,YQWDQGYFQQEIYR,YQWDQGYFQQEIYR | Deamidated [Q5],YSVEQVGVTVEFYGGELNGVSYSDP…	sp|P56777|PSBB_ARATH Photosystem II CP47 reaction center protein OS=Arabidopsis thaliana GN=psbB PE=1 SV=1	sp|P56777|PSBB_ARATH	"2155.03039233,2171.022087,1289.66190767,1290.642776,2281.0845655,1484.731131,1485.712782,886.485198,2238.1419875,2254.13853,1357.651662,1445.762406,1054.602453,1205.6514,1759.87182663,1922.8544435,1923.841592,3093.484452"	"AQLGEIFELDR,LAFYDYIGNNPAK,VSAGLAENQSLSEAWAK"	psbB	http://www.uniprot.org/uniprot/P56777	36.811024
37344736	46977292	46981844	46859384	37505208	41477440	44579032	45282776	45233700	44214988	39002024	45189788	sp|Q38882|PLDA1_ARATH	Q38882	1	18	18	91846.943	"99.7,99.3,99.7,99.7,99.7,99.7,99.7,99.0,99.7,97.4,99.7,99.7,97.2,99.7,99.7,99.7,99.7,99.7"	"AQGLEEDPR,DDNPIGATLIGR,DGEYEPAEKPDPDTDYMR,DGEYEPAEKPDPDTDYMR | Oxidation [M17],DGLMATHDEETENFFR,DGLMATHDEETENFFR | Oxidation [M4],EPWHDIHSR,FMIYVHTK,GSDVHCILCPR | Carbamidomethyl [C6 C9],IVSFVGGIDLCDGR | Carbamidomethyl [C11],IVVVDSEMPSR,LQYFHVEEDR,NPDDGGSIVQSLQISTMFTHHQK | Oxidation [M17],RPKPGGDVTIGELLK,SIDGGAAAGFPESPEAAAEAGLVSGK,SIQDAYIHAIR,VSLYQDAHIPDNFVPR,YDTPFHSLFR"	sp|Q38882|PLDA1_ARATH Phospholipase D alpha 1 OS=Arabidopsis thaliana GN=PLDALPHA1 PE=1 SV=2	sp|Q38882|PLDA1_ARATH	"1013.477968,1240.641424,2126.874023,2142.86817767,1910.812902,1926.80622,1175.546817,1037.536968,1312.601964,1506.744998,1230.627236,1334.625827,2555.208028,1578.908232,2358.1363655,1285.6778475,1869.9396085,1281.61476"	"DDNPIGATLIGR,SIQDAYIHAIR,IVVVDSEMPSR"	PLDALPHA1	http://www.uniprot.org/uniprot/Q38882	27.037037
92291344	87833456	93102168	82119296	79349696	72631184	94634600	94248288	88782304	89800296	67003100	82215624	sp|Q42472|DCE2_ARATH	Q42472	1	18	18	56139.983	"99.0,99.1,99.3,99.5,99.3,99.7,99.7,99.0,99.0,99.7,99.7,99.7,99.7,99.7,99.7,99.7,99.7,99.7"	"DAAYQIIK,DELMLDGNPR,DELMLDGNPR | Oxidation [M4],DHSFHNEFEISEMLR,DHSFHNEFEISEMLR | Oxidation [M13],EVNLSEGYYVMDPDK,EVNLSEGYYVMDPDK | Oxidation [M11],LIMDSINK,LIMDSINK | Oxidation [M3],MGIEGIAENVK,MGIEGIAENVK | Oxidation [M1],NVMENCIENMVVLK | Carbamidomethyl [C6] Oxidation [M10],NVMENCIENMVVLK | Carbamidomethyl [C6] Oxidation [M3],NYVDMDEYPVTTELQNR,NYVDMDEYPVTTELQNR | Oxidation [M5],TATNDESVCTMFGS…	sp|Q42472|DCE2_ARATH Glutamate decarboxylase 2 OS=Arabidopsis thaliana GN=GAD2 PE=1 SV=1	sp|Q42472|DCE2_ARATH	"920.495856,1158.533882,1174.529202,1889.836364,1905.82881,1757.781168,1773.777482,932.50218,948.495165,1159.59052,1175.584412,1707.79988,1707.798864,2085.9305555,2101.9272765,1674.69794,1690.693384,1250.6867485"	"VLHELDTLPSK,MGIEGIAENVK,LIMDSINK"	GAD2	http://www.uniprot.org/uniprot/Q42472	25.101215
134708800	111204256	118319344	141350688	122216864	124596144	111458912	67990128	115302024	94816376	130141992	113742760	sp|Q42522|GSA2_ARATH	Q42522	2	18	5	50140.976	"99.7,99.7,99.4,99.7,99.7,99.7,99.6,99.7,96.1,99.7,99.7,99.7,99.7,99.7,99.7,99.6,99.7,99.7"	"AATSDTLTAPYNDIAAVEK,AGSGVATLGLPDSPGVPK,DIMEMVAPAGPMYQAGTLSGNPLAMTAGIHTLK | Oxidation [M3 M5 M12 M25],ELTNGILEAGK,ELTNGILEAGKK,ELTNGILEAGKK | Deamidated [N4],FEGCYHGHANSFLVK | Carbamidomethyl [C4],FVNSGTEACMGVLR | Carbamidomethyl [C9],FVNSGTEACMGVLR | Carbamidomethyl [C9] Deamidated [N3],FVNSGTEACMGVLR | Carbamidomethyl [C9] Oxidation [M10],GTSFGAPCLLENVLAEMVISAVPSIEMVR | Carbamidomethyl [C8] Oxi…	"sp|Q42522|GSA2_ARATH Glutamate-1-semialdehyde 2,1-aminomutase 2, chloroplastic OS=Arabidopsis thaliana GN=GSA2 PE=2 SV=2"	"sp|Q42522|GSA2_ARATH,sp|P42799|GSA1_ARATH"	"1949.958364,1621.8673475,3449.635845,1143.613694,1271.706612,1272.691671,1764.804504,1539.714561,1540.702408,1555.711702,3105.557127,1285.7139725,1412.68184,1239.638768,1255.635814,965.44598,1273.633776,1289.628004"	"LSQPGTYEYLDK,SVGGQPVVMDSAK,AATSDTLTAPYNDIAAVEK"	GSA2	http://www.uniprot.org/uniprot/Q42522	42.372881
24021336	30782516	26574084	32241828	29961240	30961216	30704428	22512988	29720200	23414420	31410456	29999384	sp|Q56XG6|RH15_ARATH	Q56XG6	2	18	0	48336.916	"99.7,99.7,99.7,99.7,99.7,98.5,99.7,99.5,99.7,99.7,99.7,99.7,99.7,99.6,99.0,94.2,99.5,99.7"	"DFLLKPELLR,DNEAYEEELLDYEEEDEK,DNEAYEEELLDYEEEDEKVPDSGNK,ELAYQICNEFVR | Carbamidomethyl [C7],FMQDPMEIYVDDEAK,FMQDPMEIYVDDEAK | Deamidated [Q3],FMQDPMEIYVDDEAK | Oxidation [M2 M6],FMQDPMEIYVDDEAK | Oxidation [M2],FSTYLPDTK,GYVGIHSSGFR,HFILDECDK | Carbamidomethyl [C7],LLVECNFPSICIHSGMSQEER | Carbamidomethyl [C5 C11],LLVECNFPSICIHSGMSQEER | Carbamidomethyl [C5 C11] Oxidation [M16],LTLHGLVQHYIK,MLESL…	sp|Q56XG6|RH15_ARATH DEAD-box ATP-dependent RNA helicase 15 OS=Arabidopsis thaliana GN=RH15 PE=1 SV=3	"sp|Q56XG6|RH15_ARATH,sp|Q9LFN6|RH56_ARATH"	"1242.733419,2260.903592,2958.242805,1540.734041,1829.7842525,1830.752144,1861.775556,1845.780232,1070.528552,1178.5832065,1175.527636,2505.143136,2521.139622,1420.818783,993.462358,1009.456488,1434.704578,1181.643788"	"DFLLKPELLR,HFILDECDK | Carbamidomethyl [C7],FSTYLPDTK"	RH15	http://www.uniprot.org/uniprot/Q56XG6	36.533958
17141132	16396891	15498468	18242280	16275290	14567091	13518583	12654501	14783021	12617750	16413108	13228155	sp|Q8GZQ3|PNP1_ARATH	Q8GZQ3	1	18	18	99565.263	"99.5,99.0,99.7,99.7,97.9,99.7,98.4,99.5,99.7,99.7,99.7,99.7,99.7,99.7,99.7,99.7,99.0,99.6"	"AHGSTLFTR,AISSLEEK,ALLPESETDKDSQK,EGLCHISELSAEWLAKPEDAYK | Carbamidomethyl [C4],EILVETGLMGR,ELAGEELTK,GETQALAVVTLGDK,IDNLEGSDEYKR,IMAIDVASLER,IMAIDVASLER | Oxidation [M2],KPIPLLFSEVDVK,SMAPYGAFVEIAPGR | Oxidation [M2],TKDHEVLICR | Carbamidomethyl [C9],VAGNEDGVTAFQMDIK | Oxidation [M13],VESTVIESNGSSSMASVCGGCLALQDAGVPVK | Carbamidomethyl [C18 C21],VGGITLEIMEK,VLTILTEK,YAPLILIMK | Oxidation [M8]"	"sp|Q8GZQ3|PNP1_ARATH Polyribonucleotide nucleotidyltransferase 1, chloroplastic OS=Arabidopsis thaliana GN=PNP1 PE=1 SV=1"	sp|Q8GZQ3|PNP1_ARATH	"988.508901,875.459912,1559.767436,2545.2144,1216.650132,988.507524,1400.747194,1437.6723885,1216.647388,1232.642418,1483.864254,1580.765504,1269.649548,1709.791208,3208.503315,1188.641606,915.563562,1076.629936"	"VLTILTEK,ELAGEELTK,AISSLEEK"	PNP1	http://www.uniprot.org/uniprot/Q8GZQ3	24.295011
45793052	47597440	39507636	61339740	60513036	49889352	42171584	34258784	45453716	31842400	46077812	39828900	sp|Q8L7S8|RH3_ARATH	Q8L7S8	1	18	18	81155.402	"97.8,98.6,99.7,99.6,99.0,99.0,99.7,99.7,98.4,99.0,99.0,99.7,99.7,99.7,99.7,98.6,99.6,98.1"	"AVLVPALQGR,DSWGGDDDR,DVPEGNSLSMITK,EGSAILMHTSSQK,FFSATAQK,FLVLAPTR,GITHLFPIQR,GSSDDWLIGGR,GVDVVVGTPGR,IFLIADDR,IIDLIEGR,LPPLQDDGPSSDNYGR,LTEEAGDYTAFR,LYAIATTSTSK,QSMLFSATMPTWVK | Oxidation [M3 M9],SFGGSCFICGK | Carbamidomethyl [C6 C9],SSGGGSSWSR,TIVFTQTK"	"sp|Q8L7S8|RH3_ARATH DEAD-box ATP-dependent RNA helicase 3, chloroplastic OS=Arabidopsis thaliana GN=RH3 PE=1 SV=2"	sp|Q8L7S8|RH3_ARATH	"1022.624446,1021.37434,1389.680584,1387.675918,898.454856,915.554306,1180.6715715,1161.541615,1054.576818,961.523014,927.53999,1729.78954,1371.630652,1154.61808,1657.784458,1218.515968,966.41498,936.528022"	"GVDVVVGTPGR,AVLVPALQGR,FLVLAPTR"	RH3	http://www.uniprot.org/uniprot/Q8L7S8	25.534759
88120992	88212296	96507536	100998136	91867320	95714320	95840336	80480000	96471408	125022544	113166728	102628248	sp|Q93VC7|RPS1_ARATH	Q93VC7	1	18	18	45109.905	"99.7,99.7,99.7,99.7,97.6,99.7,99.7,99.7,99.7,99.6,99.0,99.0,99.7,99.7,99.7,99.7,99.0,99.7"	"AAAEELLEK,AEEMAQTFR,AEEMAQTFR | Oxidation [M4],FVEVDEEQTK,GFVPFSQISSK,GGLVALVEGLR,IAQAEAMAR | Oxidation [M7],KLEPTPGDMIR,KLEPTPGDMIR | Oxidation [M9],LEPTPGDMIR,MFEDAYER,MFEDAYER | Oxidation [M1],NIQYELAWER,QLQAEDVIVK,SSAYLSVEQACIHR | Carbamidomethyl [C11],TDANGALVDISAK,VMILSHDR,VSDIATVLQPGDTLK"	"sp|Q93VC7|RPS1_ARATH 30S ribosomal protein S1, chloroplastic OS=Arabidopsis thaliana GN=RPS1 PE=1 SV=1"	sp|Q93VC7|RPS1_ARATH	"972.512796,1081.48572,1097.48105,1222.57153,1195.62281,1082.645466,975.47865,1255.6591485,1271.6538405,1127.56432,1059.433064,1075.427925,1320.64696,1141.634856,1619.772484,1273.651328,969.5060895,1555.8457975"	"VSDIATVLQPGDTLK,AAAEELLEK,QLQAEDVIVK"	RPS1	http://www.uniprot.org/uniprot/Q93VC7	35.576923
18374528	19302340	19091224	18021720	17489648	17815044	20099708	16511603	19229920	18745052	17897860	19573416	sp|Q93ZT6|IF4G1_ARATH	Q93ZT6	1	18	18	85570.656	"99.7,99.7,99.7,99.4,99.7,99.7,99.7,98.8,99.7,99.6,99.7,99.4,99.0,98.6,99.7,99.7,98.1,99.6"	"ANISSNQGGGPAPVLVK,APNNFGEIVGK,AVLEPTFCPMYAK | Carbamidomethyl [C8],AVLEPTFCPMYAK | Carbamidomethyl [C8] Oxidation [M10],ETAAELFGEEGTWAR,ETTQLSDEILR,FMVQNIIDMR,GESVVSNLVPVQSASR,GQLIESGITSADILK,GVITLIFDK,IVHHIVQELLGADEK,LLPQGSSGIMSGK,LSEEVLQR,MVVDAAVR,QMSAPDQEAER | Oxidation [M2],SLLASQAADIEACR | Carbamidomethyl [C13],TITEIHTEAEK,YVEASQYNR"	sp|Q93ZT6|IF4G1_ARATH Eukaryotic translation initiation factor isoform 4G-1 OS=Arabidopsis thaliana GN=EIF(ISO)4G1 PE=1 SV=1	sp|Q93ZT6|IF4G1_ARATH	"1607.863202,1144.587202,1525.729662,1541.724224,1665.7627865,1303.661577,1265.625322,1627.852942,1543.844921,1004.590676,1699.926567,1273.672372,972.525034,859.45909,1276.532782,1503.734278,1270.640626,1128.519222"	"LSEEVLQR,ETTQLSDEILR,ANISSNQGGGPAPVLVK"	EIF	http://www.uniprot.org/uniprot/Q93ZT6	26.410256
14893625	17584028	16887060	17454552	16191009	17302304	15688865	16612571	17373776	15667829	14529801	17039416	sp|Q9C5U3|PRS8A_ARATH	Q9C5U3	8	18	17	47247.307	"99.7,99.6,97.5,99.7,99.2,99.7,99.6,99.7,99.7,99.7,99.7,99.7,99.7,99.5,99.7,99.7,99.7,99.5"	"AVAHHTDCTFIR | Carbamidomethyl [C8],AVCTEAGMFALR | Carbamidomethyl [C3],EVIELPIK,GVLLYGPPGTGK,HPELFESLGIAQPK,IDILDQALLRPGR,IEFPNPNEESR,MESGSGNGDSEVQR,MESGSGNGDSEVQR | Deamidated [N7],MESGSGNGDSEVQR | Oxidation [M1],NDSYVLHLVLPSK,RPETAMEETCNVK | Carbamidomethyl [C10],RPETAMEETCNVK | Carbamidomethyl [C10] Oxidation [M6],VDPLVNLMK,VHVTQEDFEMAVAK,VPDSTYDMIGGLDQQIK,VPDSTYDMIGGLDQQIK | Oxidation [M8],…	sp|Q9C5U3|PRS8A_ARATH 26S protease regulatory subunit 8 homolog A OS=Arabidopsis thaliana GN=RPT6A PE=1 SV=1	"sp|Q9SEI2|PS6AA_ARATH,sp|Q9SEI4|PRS6B_ARATH,tr|Q9T090|Q9T090_ARATH,sp|Q9C5U3|PRS8A_ARATH,sp|Q9MAK9|PS10B_ARATH,sp|Q9SEI3|PS10A_ARATH,sp|O04019|PS6AB_ARATH,tr|Q9FJC9|Q9FJC9_ARATH"	"1426.677357,1324.626912,939.563702,1157.64367,1564.825836,1478.857257,1330.614668,1451.591682,1452.577332,1467.585006,1483.802622,1563.70178,1579.696626,1027.573784,1602.769126,1878.9040695,1894.895294,945.513064"	"VSGSELVQK,EVIELPIK,IDILDQALLRPGR"	RPT6A	http://www.uniprot.org/uniprot/Q9C5U3	40.811456
42200016	46408284	44541152	40439168	39202056	47246492	42613576	38659752	42759520	37872804	42886740	41157096	sp|Q9FGI6|NDUS1_ARATH	Q9FGI6	2	18	0	81524.573	"99.7,99.7,99.7,99.7,99.7,99.7,99.0,99.6,99.7,99.7,98.1,96.6,99.5,99.7,99.7,99.7,98.9,99.7"	"ALSEVSGVK,ANVILPASAFTEK,ATETIDVSDAVGSNIR,DAFVVYQGHHGDK,EGTYENTEGFTQQTVPAVPTVGDAR,FASEVAGVQDLGILGR,FCYDGLKR | Carbamidomethyl [C2],FVYLMGADDVNVDK,FVYLMGADDVNVDK | Oxidation [M5],GSGEEIGTYVEK,HLGTGPDTLK,HPFCTALK | Carbamidomethyl [C4],IMAQCSAVLLK | Carbamidomethyl [C5] Oxidation [M2],LNEDINEEWISDK,LPYNSIEGVR,SVAPNLVHTDER,VEAAMVNAR,VGYVGPPAEFNYDCK | Carbamidomethyl [C14]"	"sp|Q9FGI6|NDUS1_ARATH NADH dehydrogenase [ubiquinone] iron-sulfur protein 1, mitochondrial OS=Arabidopsis thaliana GN=EMB1467 PE=1 SV=2"	"sp|Q9FGI6|NDUS1_ARATH,tr|B9DFQ9|B9DFQ9_ARATH"	"888.491306,1359.73867,1646.810096,1471.683945,2666.250467,1630.8687605,1057.501611,1584.753946,1600.749004,1267.59254,1037.550376,972.485008,1248.656906,1603.736272,1146.60239,1336.673364,959.486136,1714.765604"	"LPYNSIEGVR,ANVILPASAFTEK,SVAPNLVHTDER"	EMB1467	http://www.uniprot.org/uniprot/Q9FGI6	28.609626
35562612	46588912	39598000	45732000	33347768	41296056	33955696	26718784	32253552	32204340	34979928	35834616	sp|Q9FMD5|TIC40_ARATH	Q9FMD5	1	18	18	48902.632	"99.7,99.7,99.7,99.7,99.7,99.7,99.7,99.6,99.7,96.0,99.7,99.5,99.7,99.7,99.7,99.7,98.1,92.1"	"DIEVDKPSVVLEASK,ESPFSNYAEVSETNSPK,GGPGLSVEALEK,IMENPDVAMAFQNPR,IMENPDVAMAFQNPR | Oxidation [M2 M9],IMENPDVAMAFQNPR | Oxidation [M2],IMENPDVAMAFQNPR | Oxidation [M9],MMEDPTVQK,MMEDPTVQK | Oxidation [M1 M2],MMEDPTVQK | Oxidation [M2],MVYPYLPEEMR,NFDLNSPEVK,NYAFEDISPEETTK,QQFNQIGLTPEEVISK,VETPPSTKPKPTPAK,VQAALMECSENPMNIMK | Carbamidomethyl [C8],VQAALMECSENPMNIMK | Carbamidomethyl [C8] Oxidation [M1…	"sp|Q9FMD5|TIC40_ARATH Protein TIC 40, chloroplastic OS=Arabidopsis thaliana GN=TIC40 PE=1 SV=1"	sp|Q9FMD5|TIC40_ARATH	"1627.8667335,1884.83706733,1155.61369,1731.807521,1763.79840467,1747.804014,1747.800306,1077.483206,1109.471758,1093.478042,1426.662072,1161.56635,1642.73677,1829.95238,1576.88175,1964.88333,1996.876224,958.424258"	"NFDLNSPEVK,GGPGLSVEALEK,NYAFEDISPEETTK"	TIC40	http://www.uniprot.org/uniprot/Q9FMD5	35.57047
23475876	26335552	22947136	25612492	22005368	25748364	22771732	19493412	23738724	17972204	22001600	20177088	sp|Q9LF37|CLPB3_ARATH	Q9LF37	1	18	18	108941.646	"99.7,99.7,99.0,99.7,99.7,99.7,99.7,99.7,99.7,98.5,99.7,99.7,99.7,99.7,99.7,99.7,99.7,95.5"	"AGLSDPGRPIASFMFMGPTGVGK | Oxidation [M14 M16],CIGATTLDEYR | Carbamidomethyl [C1],DLEALFQR,EEVLGSDIAEIVSK,IESETADAEQEEAAFSK,IETELVLLK,ISDSALVEAAILSDR,IVQGDVPQALMNR,LIGAPPGYVGYEEGGQLTETVR,LLHLEEELHK,QAELTEQWEHER,QSVIDQDPEGK,SIFRPEFMNR,VDEYIVFKPLDR,VIQQNIENELAK,VNLEIQQAER,VVGQNPAVTAVAEAIQR,VYGDAAGSMLGR | Oxidation [M9]"	"sp|Q9LF37|CLPB3_ARATH Chaperone protein ClpB3, chloroplastic OS=Arabidopsis thaliana GN=CLPB3 PE=2 SV=1"	sp|Q9LF37|CLPB3_ARATH	"2324.126226,1297.596902,990.513264,1487.771118,1853.817804,1056.643072,1558.819419,1439.754866,2305.157256,1259.6881,1554.703416,1214.575632,1295.644701,1492.794504,1397.751676,1198.630448,1721.941857,1211.560374"	"VIQQNIENELAK,IETELVLLK,VNLEIQQAER"	CLPB3	http://www.uniprot.org/uniprot/Q9LF37	24.586777
153019632	139743056	171673424	164583840	151465872	159555712	169396160	133057960	180318720	126288984	167161968	174294976	sp|Q9LUT2|METK4_ARATH	Q9LUT2	4	18	10	42795.102	"99.7,99.7,99.7,99.7,99.7,99.7,99.7,99.7,99.7,99.7,99.7,99.7,99.7,99.7,99.7,99.7,99.7,99.7"	"ANVDYEQIVR,DDADFTWEVVKPLK,EHVIKPVIPEK,EIGFVSADVGLDADNCK | Carbamidomethyl [C16],FVIGGPHGDAGLTGR,IIIDTYGGWGAHGGGAFSGK,IPDKEILEIVK,KNGTCPWLRPDGK | Carbamidomethyl [C5],LCDQISDAILDACLEQDPESK | Carbamidomethyl [C2 C13],NGTCPWLRPDGK | Carbamidomethyl [C4],NGTCPWLRPDGK | Carbamidomethyl [C4] Deamidated [N1],TAAYGHFGR,TIFHLNPSGR,TNMVMVFGEITTK | Oxidation [M3 M5],TQVTIEYINESGAMVPVR,TQVTIEYINESGAMVPVR | …	sp|Q9LUT2|METK4_ARATH S-adenosylmethionine synthase 4 OS=Arabidopsis thaliana GN=METK4 PE=1 SV=1	"sp|P23686|METK1_ARATH,sp|P17562|METK2_ARATH,sp|Q9LUT2|METK4_ARATH,sp|Q9SJL8|METK3_ARATH"	"1205.60397,1661.830685,1287.75507,1808.824224,1452.747062,1962.959308,1295.7702005,1527.763002,2419.0920665,1399.666143,1400.652084,978.46734,1140.603704,1501.714621,2006.0136615,2022.008854,2648.329981,2382.26630967"	"ANVDYEQIVR,DDADFTWEVVKPLK,VLVNIEQQSPDIAQGVHGHLTK"	METK4	http://www.uniprot.org/uniprot/Q9LUT2	58.015267
30622644	31436128	28612260	26879152	24157752	27817152	29364268	28552872	28119016	26872584	26604776	23073324	sp|Q9M5K2|DLDH2_ARATH	Q9M5K2	2	18	9	53985.437	"99.7,96.4,99.2,99.0,99.7,99.7,95.3,99.7,99.7,99.7,99.7,99.7,99.7,99.7,99.7,99.7,99.7,99.7"	"AEEDGVACVEFIAGK | Carbamidomethyl [C8],AIDTAEGMVK | Oxidation [M8],ALLHSSHMYHEAK,ALLHSSHMYHEAK | Oxidation [M8],EAAMATYDKPIHM,GALGGTCLNVGCIPSK | Carbamidomethyl [C7 C12],HGHVDYDKVPGVVYTYPEVASVGK,HIIVATGSDVK,HVFANHGVK,IVSSTGALSLTEIPK,SLPGITIDEK,TPFTSGLDLEK,VCHAHPTMSEAIK | Carbamidomethyl [C2],VCHAHPTMSEAIK | Carbamidomethyl [C2] Oxidation [M8],VPGVVYTYPEVASVGK,VSSVEVDLPAMLAQK,VSSVEVDLPAMLAQK | Ox…	"sp|Q9M5K2|DLDH2_ARATH Dihydrolipoyl dehydrogenase 2, mitochondrial OS=Arabidopsis thaliana GN=LPD2 PE=1 SV=1"	"sp|Q9M5K2|DLDH2_ARATH,sp|Q9M5K3|DLDH1_ARATH"	"1593.733544,1049.506936,1522.735236,1538.7286215,1476.674148,1602.785113,2615.300988,1138.634504,1007.5284,1514.855678,1071.581262,1206.612808,1479.695994,1495.688664,1663.882122,1585.8382845,1601.833324,1117.561514"	"VVGVDSSGDGVK,VPGVVYTYPEVASVGK,VCHAHPTMSEAIK | Carbamidomethyl [C2]"	LPD2	http://www.uniprot.org/uniprot/Q9M5K2	36.883629
73759144	53536468	52584568	32258980	109995368	35236912	40479612	60367696	20302172	86517560	18621316	34877184	sp|Q9SE50|BGL18_ARATH	Q9SE50	1	18	18	60458.534	"99.7,99.0,99.7,98.8,99.7,99.7,99.7,99.7,99.7,99.7,99.7,98.2,99.0,99.2,99.7,99.7,99.7,99.7"	"CENHNADVAVDFYHR | Carbamidomethyl [C1],DLNTDAFR,DNYGDPEVIIAENGYGEDLGEK,DNYGDPEVIIAENGYGEDLGEK | Deamidated [N13],GPSMWDTFTK,GPSMWDTFTK | Oxidation [M4],GSTDYVGMNYYTSVFAK,GSTDYVGMNYYTSVFAK | Oxidation [M8],HLLSMHDAICK | Carbamidomethyl [C10],HLLSMHDAICK | Carbamidomethyl [C10] Oxidation [M5],HNDVNFGTQDHNR,HNDVNFGTQDHNRK,IGIAHSPAWFEPQDLEHVGGSIER,IGSKPFNGK,SPSWTTDSLVDWDSK,WYSEFLKPQFPTSK,YKEDIQLMK,Y…	sp|Q9SE50|BGL18_ARATH Beta-D-glucopyranosyl abscisate beta-glucosidase OS=Arabidopsis thaliana GN=BGLU18 PE=1 SV=2	sp|Q9SE50|BGL18_ARATH	"1845.784124,950.44599,2396.067325,2397.053748,1168.521948,1184.51713,1901.852236,1917.845284,1323.642768,1339.636857,1552.675815,1680.769368,2644.30602,946.52316,1722.77548,1756.88246033,1166.600295,1182.5958935"	"YKEDIQLMK,DLNTDAFR,WYSEFLKPQFPTSK"	BGLU18	http://www.uniprot.org/uniprot/Q9SE50	31.818182
1.24888e+06	756961	1782442	1.224e+06	1.53842e+06	1.40457e+06	1.07363e+06	3.71063e+06	1.32074e+06	1.65589e+06	1.15296e+06	1.328e+06	sp|Q9SV20|COPB2_ARATH	Q9SV20	2	18	2	106076.676	"99.7,99.7,99.7,99.0,99.7,99.2,99.7,96.1,99.7,99.7,99.7,99.7,99.7,99.2,99.7,99.7,99.7,99.7"	"ALSSPNLDIR,AVNYLLSNVDK,EALEGNDVEAK,EFLDHIIK,GMSQLELEDQVQDDLK,GMSQLELEDQVQDDLK | Oxidation [M2],GMSQLELEDQVQDDLKR,GTPAVANEIK,IQPTSSAMVSSR,KPVILADGTYATQSAASETTFSSPTVVQGSLTSGNLR,LLDTFYQIR,LPHGDQLFVDAPEMIEK,NAILAIMSIYK | Oxidation [M7],NNLQHPNEYIR,QMLIQAIHACAVK | Carbamidomethyl [C10],SSTMLVHYDK,VAVNTTIQNER,VLSTEQDPSAK"	sp|Q9SV20|COPB2_ARATH Coatomer subunit beta-2 OS=Arabidopsis thaliana GN=At4g31490 PE=2 SV=2	"sp|Q9SV20|COPB2_ARATH,sp|Q9SV21|COPB1_ARATH"	"1084.588194,1234.655622,1173.550612,1013.555109,1846.862836,1862.850456,2002.960635,998.5394,1262.628116,3753.912996,1167.629274,1937.951691,1251.68846,1396.684432,1481.783877,1179.5594595,1243.651938,1173.587986"	"LPHGDQLFVDAPEMIEK,QMLIQAIHACAVK | Carbamidomethyl [C10]"	At4g31490	http://www.uniprot.org/uniprot/Q9SV20	22.046414
24167192	19980644	22458196	22869168	20746420	21077720	20552908	19451540	21261068	17517372	21411516	19593752	sp|Q9SYI0|SECA1_ARATH	Q9SYI0	2	18	0	115181.928	"99.7,99.1,99.7,99.7,99.7,99.7,99.7,98.5,95.2,99.0,97.9,99.7,99.7,99.7,99.7,99.7,99.7,99.4"	"DCEWVGQVPR | Carbamidomethyl [C2],EAEIVAQSGR,EAGITHEVLNAKPENVER,FVQQAVGLR,GVHVVTVNDYLAR,KVENYFFDIR,LAEEAVQSAVEAWGQK,LCGMTGTASTESAEFESIYK | Carbamidomethyl [C2] Oxidation [M4],QVGVTDEPSSIASA,TAFLAIAK,VEDLPIESK,VENYFFDIR,VGLIQQNMTPEQR,VGLIQQNMTPEQR | Oxidation [M8],VTIVPTNKPMIR | Oxidation [M10],VVEAGGLHVVGTER,VVKPTDGVFVSVK,WSDGLHQAVEAK"	"sp|Q9SYI0|SECA1_ARATH Protein translocase subunit SECA1, chloroplastic OS=Arabidopsis thaliana GN=SECA1 PE=1 SV=2"	"sp|Q9SYI0|SECA1_ARATH,tr|F4JG57|F4JG57_ARATH"	"1244.559618,1058.536856,2005.022853,1016.577008,1441.76754,1329.671063,1714.85185233,2196.953546,1359.651802,833.500954,1028.538444,1201.57695,1512.77152,1528.767618,1383.791109,1421.762619,1373.791094,1339.653044"	"FVQQAVGLR,VVEAGGLHVVGTER,TAFLAIAK"	SECA1	http://www.uniprot.org/uniprot/Q9SYI0	19.667319
65057552	97965688	70645112	74412720	69918904	87996704	91420864	71612648	79692192	102505192	83076600	72831280	sp|Q9T0A0|LACS4_ARATH	Q9T0A0	1	18	18	74506.927	"99.7,99.2,99.0,99.7,99.7,98.3,99.7,99.7,99.0,99.7,99.0,99.0,99.7,96.2,99.7,99.7,94.7,98.0"	"AIHLDPVPFDMER,AIHLDPVPFDMER | Oxidation [M11],DLLTPTFK,EGSDGRPSVGPVYR,EIVDGKPGK,FIFDSAFSYK,GQSHVEASPLFDK,KGQSHVEASPLFDK,LESVPEMEYDALASTAR,LESVPEMEYDALASTAR | Oxidation [M7],LSDGGFLK,QGLGGNVR,SDICTIMYTSGTTGDPK | Carbamidomethyl [C4],TVVSFGGVSR,WAAENGVSGDYDALCQNEK | Carbamidomethyl [C15],YIFQVEEGK,YPNNPMLGR | Oxidation [M6],YYQSVIDEMYK"	sp|Q9T0A0|LACS4_ARATH Long chain acyl-CoA synthetase 4 OS=Arabidopsis thaliana GN=LACS4 PE=2 SV=1	sp|Q9T0A0|LACS4_ARATH	"1538.756103,1554.75132,933.517328,1474.715709,941.5156865,1223.587018,1413.6890535,1541.783835,1880.882468,1896.8748,835.4438845,799.429894,1845.811536,1007.541594,2125.909471,1111.554622,1076.506444,1437.661662"	"YYQSVIDEMYK,EGSDGRPSVGPVYR,YIFQVEEGK"	LACS4	http://www.uniprot.org/uniprot/Q9T0A0	26.426426
14296903	11288244	12475171	14181663	12062695	12949979	12383119	11905007	13129953	12377612	13687623	12930104	tr|F4HS68|F4HS68_ARATH	F4HS68	2	18	0	103940.69	"99.7,98.8,99.7,94.9,99.7,92.6,99.7,99.7,99.7,99.7,95.8,97.8,99.7,99.7,99.7,99.7,99.7,99.0"	"CLGLYSESGQYSSDQIEK | Carbamidomethyl [C1],EQEVSLLSK,HAGDLTAAAALADEAR,HCSLMPDSVYNSSR | Carbamidomethyl [C2],IDEAIAHTPTVIDLYSVK,IIEDSTNK,KPDILEQLVVEMK | Oxidation [M12],LGAENPDSHR,LNALYQSLSEQYTR,MLQADQVPLAEK,NVKPVDPDPHGQK,SNENGDTPNHPMGQTELSDGQLEAFK | Oxidation [M12],STAGEDEMSK,VLEAERPSISQLQNK,VLLSMNPDNYR,VLLSMNPDNYR | Oxidation [M5],VVQTNEALGQAR,YIKPLLTK"	tr|F4HS68|F4HS68_ARATH Tetratricopeptide repeat-containing protein OS=Arabidopsis thaliana GN=EMB2753 PE=4 SV=1	"tr|F4HS68|F4HS68_ARATH,tr|Q8VZM1|Q8VZM1_ARATH"	"2062.917256,1031.550614,1551.764034,1651.706262,1984.051164,918.464078,1556.848869,1094.508792,1684.842064,1341.695954,1429.730396,2831.231229,1053.4274,1710.926886,1320.649398,1336.64538,1284.678286,974.61654"	"VVQTNEALGQAR,MLQADQVPLAEK,YIKPLLTK"	EMB2753	http://www.uniprot.org/uniprot/F4HS68	24.917673
20870644	20826260	21357788	27052452	24417280	25325852	22378524	20420692	22633824	20046756	18679796	25746764	tr|Q9FIH8|Q9FIH8_ARATH	Q9FIH8	1	18	18	140605.247	"98.4,94.3,99.7,99.7,99.0,99.7,99.7,99.7,99.7,99.7,96.5,97.7,99.7,99.7,99.7,99.7,99.5,97.1"	"ACAYIAGPAPNR | Carbamidomethyl [C2],ASHDSAKPPGSEPILFR,CILDYLGTVK | Carbamidomethyl [C1],EGCTVTTLTVTAEPQNWQNAVK | Carbamidomethyl [C3],GAVVVGVR,GLHSNQIAPR,IFLSALHFR,IVHNIEAVFGK,LPAGLGGTFSNEK,LPVAHDGLLK,NPCFVPIPGSGLTK | Carbamidomethyl [C3],QLYLSYFR,QPTAGLQFQQVFLK,RFPIGLEEQIK,SLQSLNLESVK,SSNPPFTSVELDHSDSGR,SVWLEDAFDR,VDCQLLQHLHSENK | Carbamidomethyl [C3]"	tr|Q9FIH8|Q9FIH8_ARATH Insulinase (Peptidase family M16) family protein OS=Arabidopsis thaliana GN=At5g42390 PE=2 SV=1	tr|Q9FIH8|Q9FIH8_ARATH	"1259.608786,1807.920546,1180.615942,2446.183874,755.464938,1091.583572,1102.628676,1225.6816055,1289.660312,1061.623545,1485.764008,1088.565264,1603.87149,1328.744631,1216.666066,1930.863324,1236.577848,1719.83676"	"NPCFVPIPGSGLTK | Carbamidomethyl [C3],LPAGLGGTFSNEK,SLQSLNLESVK"	At5g42390	http://www.uniprot.org/uniprot/Q9FIH8	17.549407
65502568	61367560	65762952	73889160	69309056	77813792	64113744	57756084	63606356	55272048	69446392	76159344	sp|O04983|ACCC_ARATH	O04983	1	17	17	58386.488	"99.7,99.7,99.7,99.7,99.5,99.0,99.7,99.7,99.0,99.7,99.7,99.7,97.7,99.7,99.7,99.0,99.7"	"ALNDTIITGVPTTINYHK,DHGINFIGPNPDSIR,FGNVVHFGER,HEEELAEPQEIVAVK,HIEFQVLADK,INAEDPFK,ITSYLPSGGPFVR,LILDVEDFK,LIVWAPTR,LLEEAPSPALTAELR,MDSHVYSDYVVPPSYDSLLGK,MDSHVYSDYVVPPSYDSLLGK | Oxidation [M1],NAGVPTVPGSDGLLQSTEEAVR,SEAAAAFGNDGCYLEK | Carbamidomethyl [C12],TAHEMGIPCVAVYSTIDK | Carbamidomethyl [C9],VDTAFIVK,YKQEDIVLR"	"sp|O04983|ACCC_ARATH Biotin carboxylase, chloroplastic OS=Arabidopsis thaliana GN=CAC2 PE=1 SV=1"	sp|O04983|ACCC_ARATH	"1970.047272,1650.8115045,1160.572782,1719.868235,1198.634166,932.4605,1392.7396045,1090.59136,954.564758,1608.871282,2371.102985,2387.095761,2196.106018,1701.731693,1990.949409,891.506572,1162.6344285"	"VDTAFIVK,ITSYLPSGGPFVR,INAEDPFK"	CAC2	http://www.uniprot.org/uniprot/O04983	40.037244
12478123	15649622	16135089	15566343	12366872	13738907	16780160	13950863	16157200	10933994	14970636	16795004	sp|O81644|VILI2_ARATH	O81644	3	17	15	107841.028	"99.7,99.7,99.7,98.5,99.7,99.7,99.7,99.7,98.7,99.3,99.0,98.6,99.7,99.7,99.7,99.7,99.7"	"AAAVAALSQVLVAENKK,AASQSAEEFLASENRPK,AEALAALSSAFNSSSSSTK,ASLLFGTHHVVEDK,DPHLFSFAFNR,DTSQDEAGTAAVK,EEEEVSPAADETEAK,IYQFNGANSNIQER,LANTMSNSLK,LANTMSNSLK | Oxidation [M5],LYCITDGK | Carbamidomethyl [C3],QETEEQGDSEIQPSGATFTYEQLR,STSSNPADDIPLTEAK,VAEFLKPGITLK,VANDDDIVPESTPPK,VLDPAFQGAGQKPGTEIWR,YIDLAGSLEGLHPK"	sp|O81644|VILI2_ARATH Villin-2 OS=Arabidopsis thaliana GN=VLN2 PE=1 SV=2	"sp|O81644|VILI2_ARATH,sp|O65570|VILI4_ARATH,sp|O81645|VILI3_ARATH"	"1681.973262,1833.883761,1827.88426,1551.805408,1349.652846,1291.587794,1632.699734,1652.790404,1077.549012,1093.54411,968.463926,2742.220554,1644.784826,1314.791136,1595.7683,2069.066982,1511.7976385"	"VLDPAFQGAGQKPGTEIWR,VAEFLKPGITLK,AASQSAEEFLASENRPK"	VLN2	http://www.uniprot.org/uniprot/O81644	24.385246
14107697	18257904	18433112	18766952	15824145	19253080	19563408	16215207	16174382	19286244	13773093	16574215	sp|P30184|AMPL1_ARATH	P30184	4	17	7	54508.687	"99.7,99.7,99.0,99.0,99.7,99.7,98.1,99.7,97.2,99.1,99.2,99.7,99.7,99.7,99.7,99.7,99.7"	"AGGSITAALFLK,AVDIIGFGTGAEVEK,EIDVIEWK,EVIAASER,FDMGGSAAVLGAAK,FDMGGSAAVLGAAK | Oxidation [M3],GDILVVGVTEK,GLTFDSGGYNIK,MPLEESYWEMMK | Oxidation [M1 M10],MPLEESYWEMMK | Oxidation [M10 M11],MPLEESYWEMMK | Oxidation [M11],SGVADMVNTGGR,SGVADMVNTGGR | Oxidation [M6],TGPGCSIELMK | Carbamidomethyl [C5] Oxidation [M10],TIEVNNTDAEGR,VASTYSDVFTANILNEEQCK | Carbamidomethyl [C19],YAEDVSYGVIFGR"	sp|P30184|AMPL1_ARATH Leucine aminopeptidase 1 OS=Arabidopsis thaliana GN=PM25 PE=1 SV=1	"sp|P30184|AMPL1_ARATH,tr|F4INR3|F4INR3_ARATH,sp|Q8RX72|AMPL2_ARATH,sp|Q944P7|AMPL3_ARATH"	"1147.660801,1504.775242,1030.533968,873.455602,1293.637628,1309.634124,1128.636764,1270.618864,1604.655466,1604.656188,1588.661784,1162.540304,1178.534664,1207.557474,1317.621128,2288.060613,1474.708142"	"TGPGCSIELMK | Carbamidomethyl [C5] Oxidation [M10],GDILVVGVTEK,AVDIIGFGTGAEVEK"	PM25	http://www.uniprot.org/uniprot/P30184	30.769231
30023348	27617576	30230012	30673176	28757032	31342488	26899120	24948704	28318836	30754592	32925900	29137056	sp|P37107|SR54C_ARATH	P37107	1	17	17	61231.541	"99.7,99.0,99.7,99.7,99.7,99.7,97.7,99.7,99.0,95.6,98.5,99.7,99.7,99.7,99.7,98.9,98.4"	"ALLEADVSLPVVR,DNIAEPMR,ERPELLAESPER,FVESASSKPGPR,FVQSVSDQAVGMGVIR,FVQSVSDQAVGMGVIR | Oxidation [M12],GGAALSVK,GVKPDQQLVK,IVHDELVK,KNNVDVVIMDTAGR,LKGEEVLTK,LMGGEVSELQFAK,MEDLEPFYPDR,MEDLEPFYPDR | Oxidation [M1],QEDAEDLQK,VLGMIPGMGK,VLGMIPGMGK | Oxidation [M4 M8]"	"sp|P37107|SR54C_ARATH Signal recognition particle 54 kDa protein, chloroplastic OS=Arabidopsis thaliana GN=FFC PE=1 SV=1"	sp|P37107|SR54C_ARATH	"1380.7962025,944.438754,1424.726091,1260.645548,1691.866861,1707.861027,701.406894,1110.639597,951.5388295,1530.782532,1015.591284,1407.706112,1410.611058,1426.606754,1074.482108,1001.540154,1033.530264"	"ERPELLAESPER,GVKPDQQLVK,ALLEADVSLPVVR"	FFC	http://www.uniprot.org/uniprot/P37107	27.12766
59886108	90735360	69816536	72536848	69387328	57612372	84273816	52690448	76820024	57798840	106516176	72854608	sp|P49209|RL91_ARATH	P49209	2	17	13	22017.38	"99.7,99.7,99.7,99.7,99.0,99.7,99.7,99.7,99.7,96.6,99.7,99.7,99.7,99.7,98.4,99.0,99.7"	"DEIVLDGNDIELVSR,FLDGIYVSEK,FVYAHFPINASIGGDGK,HLNLDFQLIKDPETGK | Deamidated [N3],IDSWFGTR,KFLDGIYVSEK,KVEMLDGVTIVR,KVEMLDGVTIVR | Oxidation [M4],LKIDSWFGTR,SCALINQK | Carbamidomethyl [C2],TALSHVDNLISGVTR,TILSSETMDIPDSVTIK,TILSSETMDIPDSVTIK | Oxidation [M8],VEMLDGVTIVR,VEMLDGVTIVR | Oxidation [M3],VIEVEGPR,VKDEIVLDGNDIELVSR"	sp|P49209|RL91_ARATH 60S ribosomal protein L9-1 OS=Arabidopsis thaliana GN=RPL9B PE=1 SV=3	"sp|Q9SZX9|RL92_ARATH,sp|P49209|RL91_ARATH"	"1685.84679,1169.596918,1791.8946935,1867.980534,980.471364,1297.691313,1358.7591625,1374.7531735,1221.650541,932.475016,1581.847195,1848.94153,1864.933722,1230.6635,1246.65681,897.492188,1913.0103535"	"IDSWFGTR,TALSHVDNLISGVTR,KVEMLDGVTIVR"	RPL9B	http://www.uniprot.org/uniprot/P49209	67.525773
23508392	27493648	24213024	26570116	19784696	27630772	23252816	26694936	21402844	26293760	18627384	22747788	sp|P52901|ODPA1_ARATH	P52901	2	17	11	43058.695	"97.1,99.0,99.0,99.7,99.7,99.7,94.5,99.7,99.7,99.7,99.7,99.7,99.7,99.5,99.7,99.7,99.7"	"DAIITAYR,DHCIFLGR | Carbamidomethyl [C3],EVDDAIAK,GFGTESFGPDR,GGSLHEVFSELMGR,GGSLHEVFSELMGR | Oxidation [M12],GGSMHFYK,GPIILEMDTYR,GPIILEMDTYR | Oxidation [M7],KEVDDAIAK,LVLSHDLATEK,MEIAADSLYK,MEIAADSLYK | Oxidation [M1],RGDYVPGLK,VDGMDAFAVK,YHGHSMSDPGSTYR,YHGHSMSDPGSTYR | Oxidation [M6]"	"sp|P52901|ODPA1_ARATH Pyruvate dehydrogenase E1 component subunit alpha-1, mitochondrial OS=Arabidopsis thaliana GN=E1 ALPHA PE=2 SV=2"	"sp|Q8H1Y0|ODPA2_ARATH,sp|P52901|ODPA1_ARATH"	"921.491925,1016.486382,859.42886,1168.515044,1517.729835,1533.725226,925.411594,1306.659324,1322.654066,987.522812,1224.6710785,1139.553084,1155.547728,1003.545254,1051.500946,1593.66297,1609.655265"	"LVLSHDLATEK,GFGTESFGPDR,GPIILEMDTYR"	E1	http://www.uniprot.org/uniprot/P52901	31.619537
19108028	25671480	25158348	18955036	19094340	20469000	25696460	19253540	22772604	22155468	20465824	21667352	sp|P93033|FUM1_ARATH	P93033	2	17	10	52998.907	"99.7,99.7,96.2,99.7,99.7,99.7,99.7,99.7,99.7,99.7,99.0,99.7,99.7,99.7,99.7,99.7,97.9"	"AIMQAAQEVAEGK,AIMQAAQEVAEGK | Oxidation [M3],CGLGELVLPENEPGSSIMPGK | Carbamidomethyl [C1] Oxidation [M18],CVHPNDHVNR | Carbamidomethyl [C1],DTFGPIQVPSDK,FEALAAHDACVETSGSLNTIATSLMK | Carbamidomethyl [C10] Oxidation [M25],IAAAVAEETNLPFVTAENK,IGYDNAAAVAK,LLHESLMLVTSLNPK,LLHESLMLVTSLNPK | Oxidation [M7],LWGAQTQR,LYQLAQGGTAVGTGLNTK,SQSSNDTFPTVMHIAAATEINSR,SQSSNDTFPTVMHIAAATEINSR | Oxidation [M12],THT…	"sp|P93033|FUM1_ARATH Fumarate hydratase 1, mitochondrial OS=Arabidopsis thaliana GN=FUM1 PE=2 SV=2"	"sp|P93033|FUM1_ARATH,sp|Q9FI53|FUM2_ARATH"	"1344.670638,1360.666614,2199.055386,1246.559721,1302.644906,2752.305738,1987.027342,1091.561238,1693.943064,1709.938539,958.498698,1790.95221825,2476.16682,2492.160246,2462.20749,1435.701144,1451.68462"	"AIMQAAQEVAEGK,THTQDATPLTLGQEFGGYATQVK,LYQLAQGGTAVGTGLNTK"	FUM1	http://www.uniprot.org/uniprot/P93033	43.089431
2.63842e+06	2.54325e+06	2.4616e+06	2.74153e+06	2.33314e+06	3.27617e+06	2571843	1.9627e+06	3274101	2168463	2.72244e+06	2.9566e+06	sp|Q1WIQ6|GAPN_ARATH	Q1WIQ6	2	17	1	53059.743	"99.7,98.8,98.0,98.9,99.7,99.7,98.5,99.7,99.0,99.7,99.7,99.7,99.7,95.2,99.7,99.7,99.0"	"AGMIPLQMELGGK,AGMIPLQMELGGK | Oxidation [M3],AGMIPLQMELGGK | Oxidation [M8],APMAESLVK,DSGIGSQGVTNSINLMTK,DSGIGSQGVTNSINLMTK | Oxidation [M16],DSVTEVVR,FLLSDSFPGNDR,GGFSYSGQR,GLISCITGK | Carbamidomethyl [C5],GPDHFPFQGLK,INSVEEGINHCNASNFGLQGCVFTK | Carbamidomethyl [C11 C21],SGDLISYCAEEGVR | Carbamidomethyl [C8],SVAIMNPATR,VQACTQEEVNAVMELAK | Carbamidomethyl [C4],VQACTQEEVNAVMELAK | Carbamidomethyl…	sp|Q1WIQ6|GAPN_ARATH NADP-dependent glyceraldehyde-3-phosphate dehydrogenase OS=Arabidopsis thaliana GN=ALDH11A3 PE=1 SV=2	"sp|Q1WIQ6|GAPN_ARATH,tr|F4INS6|F4INS6_ARATH"	"1343.694578,1359.687656,1359.688166,944.500016,1820.894786,1836.889618,903.46612,1366.651344,957.430558,947.510258,1241.6206095,2794.284528,1554.697866,1058.55414,1918.913444,1935.887589,1030.439766"	AGMIPLQMELGGK | Oxidation [M8]	ALDH11A3	http://www.uniprot.org/uniprot/Q1WIQ6	32.862903
139097536	134045992	138875968	146331824	123375488	153972928	149526272	133273360	135518320	132953824	118156104	132625696	sp|Q38900|CP19A_ARATH	Q38900	2	17	15	18491.739	"99.0,99.7,99.7,99.7,99.7,99.7,99.7,99.7,99.7,99.7,99.7,99.7,99.7,99.7,99.3,99.4,99.5"	"FKDENFIK,FKDENFIKK,FMCQGGDFTAGNGTGGESIYGSK | Carbamidomethyl [C3],FMCQGGDFTAGNGTGGESIYGSK | Carbamidomethyl [C3] Deamidated [N12],FMCQGGDFTAGNGTGGESIYGSK | Carbamidomethyl [C3] Deamidated [N12] Oxidation [M2],FMCQGGDFTAGNGTGGESIYGSK | Carbamidomethyl [C3] Oxidation [M2],HTGPGILSMANAGANTNGSQFFICTEK | Carbamidomethyl [C24],HTGPGILSMANAGANTNGSQFFICTEK | Carbamidomethyl [C24] Deamidated [N17],HTGPGI…	sp|Q38900|CP19A_ARATH Peptidyl-prolyl cis-trans isomerase CYP19-1 OS=Arabidopsis thaliana GN=CYP19-1 PE=1 SV=1	"sp|Q42406|CP18D_ARATH,sp|Q38900|CP19A_ARATH"	"1039.5342755,1167.628474,2339.9800185,2340.963898,2356.959498,2355.9750025,2822.312017,2823.295485,2839.286364,2838.310472,1650.9212805,1651.903923,2098.9885195,2114.9834185,1473.749426,1115.532078,1131.52674333"	"TSKPVVIADCGQIS | Carbamidomethyl [C10],HVVFGQVVEGLNVVR,VYFDMTVGGK"	CYP19	http://www.uniprot.org/uniprot/Q38900	67.052023
1047236032	1015104384	1247050752	1173420288	1014489344	1215488384	1155591296	1176915712	1109466496	1318530688	1098697984	1240034816	sp|Q42029|PSBP1_ARATH	Q42029	2	17	14	28094.895	"99.6,98.6,99.7,99.7,99.3,99.7,99.7,99.7,99.7,99.7,99.7,99.7,99.7,99.7,99.7,99.7,99.7"	"EIEYPGQVLR,EIEYPGQVLR | Deamidated [Q7],FEDNFDATSNLNVMVTPTDK,FEDNFDATSNLNVMVTPTDK | Deamidated [N12],FEDNFDATSNLNVMVTPTDK | Deamidated [N4] Oxidation [M14],FEDNFDATSNLNVMVTPTDK | Oxidation [M14],FEDNFDATSNLNVMVTPTDKK,FEDNFDATSNLNVMVTPTDKK | Oxidation [M14],FVESAATSFSVA,HQLITATVNGGK,HQLITATVNGGK | Deamidated [N9],KFVESAATSFSVA,SITDYGSPEEFLSQVNYLLGK,TADGDEGGKHQLITATVNGGK | Deamidated [N18],TNTDFLP…	"sp|Q42029|PSBP1_ARATH Oxygen-evolving enhancer protein 2-1, chloroplastic OS=Arabidopsis thaliana GN=PSBP1 PE=1 SV=2"	"sp|Q42029|PSBP1_ARATH,sp|O49344|PSBP2_ARATH"	"1202.63213,1203.611886,2257.02111389,2258.021961,2274.021032,2273.01569362,2385.11595167,2401.111744,1214.5818264,1237.6775395,1238.66192,1342.67503945,2359.15895,2069.002092,1587.72097767,1588.702908,1890.949083"	"EIEYPGQVLR,TNTDFLPYNGDGFK,TNTDFLPYNGDGFK | Deamidated [N9]"	PSBP1	http://www.uniprot.org/uniprot/Q42029	45.247148
644592128	683044864	682893056	700017856	664266368	727095488	668728640	771271488	686638464	638037248	607475968	721810048	sp|Q43127|GLNA2_ARATH	Q43127	2	17	15	47410.03	"99.0,99.7,99.0,99.0,99.7,99.7,99.7,99.7,99.7,99.7,99.7,99.7,99.7,99.7,99.7,99.7,99.7"	"AAEIFSNK,AAEIFSNKK,AILNLSLR,DISDAHYK,EEGGFEVIK,EEGGFEVIKK,EHISAYGEGNER,GGNNILVICDTWTPAGEPIPTNK | Carbamidomethyl [C9],GGNNILVICDTWTPAGEPIPTNKR | Carbamidomethyl [C9],HETASIDQFSWGVANR,HKEHISAYGEGNER,ITEQAGVVLTLDPKPIEGDWNGAGCHTNYSTK | Carbamidomethyl [C25],SMREEGGFEVIK | Oxidation [M2],TIEKPVEDPSELPK,VETLLNLDTKPYSDR,VSGEVPWFGIEQEYTLLQQNVK,WPLGWPVGAFPGPQGPYYCGVGADK | Carbamidomethyl [C19]"	"sp|Q43127|GLNA2_ARATH Glutamine synthetase, chloroplastic/mitochondrial OS=Arabidopsis thaliana GN=GLN2 PE=1 SV=1"	"sp|Q8LCE1|GLN12_ARATH,sp|Q43127|GLNA2_ARATH"	"878.449872,1006.545132,898.560628,947.434887,1006.49706,1134.592028,1360.601979,2466.229304,2622.322578,1816.84840725,1625.751734,3470.67825,1396.664927,1580.829995,1762.913186,2563.298948,2675.266356"	"EEGGFEVIK,AAEIFSNK,VETLLNLDTKPYSDR"	GLN2	http://www.uniprot.org/uniprot/Q43127	46.511628
57452888	65080216	55591880	60669716	54547692	59665876	63849320	59829564	64305248	61472652	59919432	63340816	sp|Q8L940|PDX13_ARATH	Q8L940	2	17	10	33215.969	"99.7,99.7,99.7,99.7,99.7,99.0,99.7,99.7,95.8,99.0,99.0,99.7,99.1,99.7,99.7,99.0,99.0"	"GEAGTGNIIEAVR,GGVIMDVVNAEQAR,GGVIMDVVNAEQAR | Oxidation [M5],IAEEAGACAVMALER | Carbamidomethyl [C8],IAEEAGACAVMALER | Carbamidomethyl [C8] Oxidation [M11],IPFVCGCR | Carbamidomethyl [C5 C7],LAAPYDLVMQTK,LAAPYDLVMQTK | Oxidation [M9],MSDPQMIK | Deamidated [Q5],MSDPQMIK | Oxidation [M1 M6],MSDPQMIK | Oxidation [M1],NMDDDEVFTFAK,NMDDDEVFTFAK | Oxidation [M2],QAVTIPVMAK,TKGEAGTGNIIEAVR,VGLAQMLR,VGLA…	sp|Q8L940|PDX13_ARATH Pyridoxal 5'-phosphate synthase subunit PDX1.3 OS=Arabidopsis thaliana GN=PDX13 PE=1 SV=2	"sp|O80448|PDX11_ARATH,sp|Q8L940|PDX13_ARATH"	"1285.66203,1457.729889,1473.722533,1589.75518167,1605.74955475,1007.468092,1348.705854,1364.700853,949.424836,980.430244,964.43577,1430.601918,1446.596318,1056.600146,1514.8058725,886.506242,902.500756"	"GEAGTGNIIEAVR,LAAPYDLVMQTK,NMDDDEVFTFAK"	PDX13	http://www.uniprot.org/uniprot/Q8L940	33.009709
27479720	24182684	23336268	23987756	22147880	23670228	24054924	24605696	22221792	23690228	19543472	23288236	sp|Q8W4S4|VHAA3_ARATH	Q8W4S4	2	17	12	92832.295	"99.7,99.7,99.7,99.7,99.7,99.0,99.7,97.2,99.7,99.0,99.5,99.7,99.7,99.7,99.2,99.4,99.7"	"AGEFFSSAHR,AIYHTLNMLSLDVTK | Oxidation [M8],CLVAEGWSPVFASR | Carbamidomethyl [C1],DTYPFGLDPVWHGSR,DVSCSEATTIGLIK | Carbamidomethyl [C4],EIQDALQR,ENDIDLDDVEVK,ESPPTYFR,ETESQQAGEDLLESPLLQEEK,FYEGDGYK,ICEAFGANR | Carbamidomethyl [C2],LGELEAELVEINANNDK,QAQMITEVSGR,QTVIEEPVIDPNSGEK,SYNELMEYK,SYNELMEYK | Oxidation [M6],TTIDAGLGQR"	sp|Q8W4S4|VHAA3_ARATH V-type proton ATPase subunit a3 OS=Arabidopsis thaliana GN=VHA-a3 PE=1 SV=1	"sp|Q8W4S4|VHAA3_ARATH,sp|Q9SJT7|VHAA2_ARATH"	"1107.51025,1733.902194,1577.76495,1745.815965,1492.74396,971.503616,1402.646466,995.471278,2372.124222,977.412818,1036.47592,1869.9340805,1218.60211,1753.873048,1175.516184,1191.510898,1030.541132"	"ESPPTYFR,EIQDALQR,TTIDAGLGQR"	VHA	http://www.uniprot.org/uniprot/Q8W4S4	23.995128
22458600	27514452	28141692	26665384	23485708	27669472	29249172	18259800	26711472	23318580	27273188	26867156	sp|Q93Z16|RPN2_ARATH	Q93Z16	2	17	0	74667.219	"99.0,99.7,99.7,99.7,99.7,99.7,99.7,99.7,99.6,99.7,99.7,99.7,99.7,99.6,99.0,99.0,99.7"	"AEISHIFR,ATRPPLQSTEPYSR,DGAVSLSANHLQK,DIVSQLQAGVK,FSVPLILSLPSTVISLTK,GLTSFAASESTGLNLPGDK,IVLDESAHEK,SAALDVFVPVDGSYK,SLEEAYEALK,SVDASQGPISTTASVIR,SVDSSVINNQELK,TLEILGIDK,TLEILGIDKK,VLQSSSSTLK,VSTVLGSK,VYITEAQTK,YDDGTFYFDEK"	sp|Q93Z16|RPN2_ARATH Dolichyl-diphosphooligosaccharide--protein glycosyltransferase subunit 2 OS=Arabidopsis thaliana GN=RPN2 PE=2 SV=1	"tr|F4JIM7|F4JIM7_ARATH,sp|Q93Z16|RPN2_ARATH"	"971.518698,1601.815749,1338.6888665,1156.645004,1914.144374,1863.92229,1139.58171,1566.792866,1151.571682,1687.873648,1431.72121,1000.580326,1128.675417,1048.576978,789.459626,1051.555382,1398.559858"	"SVDSSVINNQELK,SVDASQGPISTTASVIR,DIVSQLQAGVK"	RPN2	http://www.uniprot.org/uniprot/Q93Z16	28.364689
3849543	5293412	3.73945e+06	4.12021e+06	3850322	3.9911e+06	4752188	3.40694e+06	4265207	2.95109e+06	4.87452e+06	3.72186e+06	sp|Q94AI7|TPL_ARATH	Q94AI7	5	17	7	124296.647	"97.9,93.0,99.0,95.7,99.7,99.7,97.7,95.9,99.7,99.7,97.3,99.7,99.7,99.7,99.5,99.7,97.3"	"AWLYDNMGSR,EGSLLAVSGNENVIK,EPVVSVNR,LFSCGTSK | Carbamidomethyl [C4],LIEANPLFR,LTEVSEPSQCR | Carbamidomethyl [C10],NDSYVMSASGGK,NPRPNPDIK,QLCVITCGDDK | Carbamidomethyl [C3 C7],SANVVSIQGMNGDSR,TLFVDHSCGPPNGAR | Carbamidomethyl [C8],TLINQSLNWQHQLCK | Carbamidomethyl [C14],TPPTNASLDYPSADSEHVSK,VFSTFNEELFK,VWDAATGVK,WGVAPPAENGSASGAPTAPSVGASASDQPQR,YLAAGDDFSIK"	sp|Q94AI7|TPL_ARATH Protein TOPLESS OS=Arabidopsis thaliana GN=TPL PE=1 SV=1	"sp|Q0WV90|TPR1_ARATH,tr|F4J043|F4J043_ARATH,sp|Q9LRZ0|TPR2_ARATH,sp|Q27GK7|TPR4_ARATH,sp|Q94AI7|TPL_ARATH"	"1211.53902,1528.807064,898.487094,898.421338,1071.607406,1304.602698,1214.523914,1049.561067,1307.584496,1533.720528,1626.758379,1881.951765,2114.975577,1359.671144,945.49238,2919.374997,1198.582714"	"EGSLLAVSGNENVIK,LTEVSEPSQCR | Carbamidomethyl [C10],TLFVDHSCGPPNGAR | Carbamidomethyl [C8]"	TPL	http://www.uniprot.org/uniprot/Q94AI7	19.451813
60760424	42251576	55113152	63501776	55702728	56304876	47216460	43198004	46291508	42413596	48324344	47704896	sp|Q94AR8|LEUC_ARATH	Q94AR8	1	17	17	55013.415	"99.7,99.7,99.7,98.6,99.7,99.7,99.7,99.2,99.7,99.7,99.7,99.7,99.7,99.7,98.3,99.7,98.3"	"FILDGEMPSYLQAK | Oxidation [M7],IVVIPDHYIFTADK,IVVIPDHYIFTADKR,LEPVVAKPHSPDNR,LNEPQVCVSTTNR | Carbamidomethyl [C7],MTLCNMVVEAGGK | Carbamidomethyl [C4],MTLCNMVVEAGGK | Carbamidomethyl [C4] Oxidation [M1 M6],MTLCNMVVEAGGK | Carbamidomethyl [C4] Oxidation [M1],NGVIPPDATTLNYVENR,TCAQIFEEAGCDTPASPSCGACLGGPADTYAR | Carbamidomethyl [C2 C11 C19 C22],TEDFMAAAK,TEDFMAAAK | Oxidation [M5],TMEFSGTTIESLSMEE…	sp|Q94AR8|LEUC_ARATH 3-isopropylmalate dehydratase large subunit OS=Arabidopsis thaliana GN=IIL1 PE=1 SV=1	sp|Q94AR8|LEUC_ARATH	"1626.796358,1629.876231,1785.97772,1557.825426,1516.730824,1408.6505,1440.641156,1424.647068,1871.936598,3389.4103005,982.442728,998.437596,1978.851484,2320.064738,1426.855098,1199.690616,1040.495902"	"VPTFLVPATQK,LNEPQVCVSTTNR | Carbamidomethyl [C7],IVVIPDHYIFTADK"	IIL1	http://www.uniprot.org/uniprot/Q94AR8	36.935167
16937180	16971968	17917884	16806372	13953689	17308464	15264247	15789928	16744292	14867385	13798667	15417212	sp|Q94BT0|SPSA1_ARATH	Q94BT0	1	17	17	117319.613	"98.9,99.7,99.5,99.0,99.0,99.7,99.7,99.7,98.3,99.7,99.3,99.7,99.0,99.7,99.7,96.0,99.7"	"ALGSMPGVYR,CHVVYSQNGTR | Carbamidomethyl [C1],DIQDISLNLK,DKLEQLLR,EEINSTYK,ELANLALIMGNR,FSFDGSGNDNYMNQEGSSMDR,GDIISDISTHGESTKPR,INVIPVLASR,LIDKYDLYGQVAYPK,LYDGFDPILER,MAVFVGESGDTDYEGLLGGLHK | Oxidation [M1],QEIDEQWR,QVSSPDVDYSYGEPTEMLTPR,QVSSPDVDYSYGEPTEMLTPR | Oxidation [M17],WASSLNEK,YDLYGQVAYPK"	sp|Q94BT0|SPSA1_ARATH Sucrose-phosphate synthase 1 OS=Arabidopsis thaliana GN=SPS1 PE=1 SV=1	sp|Q94BT0|SPSA1_ARATH	"1049.53334,1319.603028,1157.628806,1013.587593,982.460016,1313.713714,2356.898529,1811.900334,1080.665044,1784.93675,1336.665402,2310.083352,1102.504778,2370.071252,2386.063194,933.454778,1315.643492"	"ALGSMPGVYR,INVIPVLASR,LYDGFDPILER"	SPS1	http://www.uniprot.org/uniprot/Q94BT0	18.408437
68029808	62861956	59281816	65324880	52836848	58930012	60594436	62327952	66244312	67731096	60293392	63547648	sp|Q9C5M0|DTC_ARATH	Q9C5M0	1	17	17	31912.049	"99.7,99.7,99.7,99.7,99.7,99.7,99.6,99.0,99.7,99.7,99.7,99.7,99.7,99.7,99.0,99.7,99.7"	"AIESNDGKPLPLYQK,AMALNMGMLASYDQSAEYMR | Oxidation [M2 M6 M8],AMALNMGMLASYDQSAEYMR | Oxidation [M2 M6],AMALNMGMLASYDQSAEYMR | Oxidation [M2 M8],AMALNMGMLASYDQSAEYMR | Oxidation [M6 M8 M19],AMALNMGMLASYDQSAEYMR | Oxidation [M6 M8],FYSGFPVYCVR | Carbamidomethyl [C9],GLSAGLLR,IQLGQGSAASITTNMLK | Oxidation [M15],MQADNTLPLAQR,MQADNTLPLAQR | Oxidation [M1],NEGVGAFYK,NYTNAFHALTR,NYTNAFHALTR | Deamidated …	sp|Q9C5M0|DTC_ARATH Mitochondrial dicarboxylate/tricarboxylate transporter DTC OS=Arabidopsis thaliana GN=DTC PE=1 SV=1	sp|Q9C5M0|DTC_ARATH	"1671.88359,2299.95726367,2283.969448,2283.965744,2299.9564195,2283.9637085,1393.647302,785.476258,1747.913912,1356.6818,1372.675812,983.471046,1306.6418015,1307.626239,910.449242,1404.60551,1420.599504"	"MQADNTLPLAQR,FYSGFPVYCVR | Carbamidomethyl [C9],YPYTGSLDCAMK | Carbamidomethyl [C9]"	DTC	http://www.uniprot.org/uniprot/Q9C5M0	41.275168
21431016	26044068	25791672	28532740	21158712	24725520	24635244	16303247	26676392	21886236	27001744	25156876	sp|Q9C5Z3|EIF3E_ARATH	Q9C5Z3	1	17	17	51749.428	"99.7,99.7,99.6,99.7,99.7,99.3,99.7,99.7,97.9,99.7,98.7,92.7,99.7,99.7,99.7,99.7,99.7"	"ECEEVIVNDPFLGK | Carbamidomethyl [C2],IDMGVLAEK,IQLLNQTNMVDYAMDIHK | Oxidation [M9 M14],LFVFETYCK | Carbamidomethyl [C8],LVNQLLEHTQAQATR,QLYPDEQILK,QNYDLTPLIAPNLDR,SFSSPLNQVQNR,SLSALWGK,SLYHTEDAPQEMVER,SLYHTEDAPQEMVER | Oxidation [M12],TLCSNLER | Carbamidomethyl [C3],TQIIDLFNQDK,VEDGNFSTVPLR,VEDGNFSTVPLRDEFLENAR,YLATAFIVNK,YLNAIQTSAPHLLR"	sp|Q9C5Z3|EIF3E_ARATH Eukaryotic translation initiation factor 3 subunit E OS=Arabidopsis thaliana GN=TIF3E1 PE=1 SV=1	sp|Q9C5Z3|EIF3E_ARATH	"1647.781754,974.51063,2178.041343,1205.578786,1720.922076,1245.65953,1741.899781,1375.683616,860.477796,1803.80682,1819.804809,991.474774,1333.686708,1332.667536,2307.113865,1138.638228,1595.8775965"	"LVNQLLEHTQAQATR,TQIIDLFNQDK,VEDGNFSTVPLRDEFLENAR"	TIF3E1	http://www.uniprot.org/uniprot/Q9C5Z3	42.630385
23078696	23135996	22094796	27369304	20160404	24976688	21885176	17501424	22727520	14644047	29114404	25042964	sp|Q9LD55|EIF3A_ARATH	Q9LD55	1	17	17	114298.122	"98.5,99.7,99.7,99.7,97.4,99.7,99.7,99.7,99.7,99.7,99.7,99.0,99.7,92.3,99.7,99.7,99.7"	"ADELINVGQK,AMLYPVPSK,AQSASHMELENEK | Oxidation [M7],DHLAVFAESLSK,EIFQAQVISR,ELEEAQALLEETEKR,GVLSCASQEVK | Carbamidomethyl [C5],HFLHLATDK,IVCQQVNVSSLEEVIK | Carbamidomethyl [C3],KPEDLQLSIVSGEK,LAEPTVTPVGTTAPAAAAAAAGAPAAPYVPK,LQEEEEAR,MANLIGFNLEPK,NHLANLNK,QTTEVSGPSAPTSSETDR,RADELINVGQK,SALLSELVSK"	sp|Q9LD55|EIF3A_ARATH Eukaryotic translation initiation factor 3 subunit A OS=Arabidopsis thaliana GN=TIF3A1 PE=1 SV=1	sp|Q9LD55|EIF3A_ARATH	"1085.571134,1004.536274,1488.648498,1315.677114,1189.645178,1786.894822,1176.581074,1080.571404,1843.971168,1541.8291705,2801.499458,1002.460358,1345.704258,922.498024,1848.833488,1241.672924,1045.60225"	"SALLSELVSK,GVLSCASQEVK | Carbamidomethyl [C5],MANLIGFNLEPK"	TIF3A1	http://www.uniprot.org/uniprot/Q9LD55	20.972644
65149528	63121756	59651216	58120484	46908164	56168528	52217588	50206180	58354884	46930080	52942080	54564776	sp|Q9ZU25|MPPA1_ARATH	Q9ZU25	2	17	14	54401.357	"99.7,99.7,99.0,99.0,99.0,99.3,99.6,99.7,99.7,99.7,99.1,96.1,99.7,99.3,99.0,99.7,99.0"	"EIEAIGGNTSASASR,EQMSYTIDALK,GMHSWLYR,GMHSWLYR | Oxidation [M2],KPVDQFLK,LQITTLPNGLK,MIAAEDIGR | Oxidation [M1],MKVEIAELAK,MKVEIAELAK | Oxidation [M1],MVLAASGVEHEELLK,NPAFLDWEVNEELRK,QILTYGER,SAVLMNLESR | Oxidation [M5],SQYVGGDFR,SVDQLTLK,VAEPLTSDLPNVPPQLAPK,VEIAELAK"	sp|Q9ZU25|MPPA1_ARATH Probable mitochondrial-processing peptidase subunit alpha-1 OS=Arabidopsis thaliana GN=At1g51980 PE=2 SV=1	"sp|Q9ZU25|MPPA1_ARATH,sp|O04308|MPPA2_ARATH"	"1461.705938,1297.622572,1048.49145,1064.486499,973.55922,1196.712096,990.479946,1130.636826,1146.631549,1624.8484835,1858.920693,978.513272,1134.570227,1027.472376,902.50708,1985.0835245,871.501088"	"LQITTLPNGLK,QILTYGER,SVDQLTLK"	At1g51980	http://www.uniprot.org/uniprot/Q9ZU25	31.013917
11113105	11087347	11802167	12161891	10972066	10311879	13175404	11593225	13765978	8007079	11276491	11709499	sp|Q9ZUY6|AXS1_ARATH	Q9ZUY6	2	17	5	43637.359	"98.3,99.5,99.7,96.2,99.7,99.7,99.7,99.7,99.0,99.7,99.7,99.3,99.7,99.0,99.7,99.7,99.7"	"DDPAFYVLK,DHPLRDDPAFYVLK,EDISPCIFGSIEK | Carbamidomethyl [C6],EFYGEGYDDSDK,EFYGEGYDDSDKR,HLLEPDTVEWSGR,IPDMTIINR,LIHFSTCEVYGK | Carbamidomethyl [C7],LLTETPHK,LVDGGESQR,MDFIPGIDGPSEGVPR,QLAEMMTEVYAK | Oxidation [M5 M6],QLAEMMTEVYAK | Oxidation [M5],TIGSFLPK,VLACFSNNLLR | Carbamidomethyl [C4],VLALDVYNDK,VSGEGAIESPTVDVSSK"	sp|Q9ZUY6|AXS1_ARATH UDP-D-apiose/UDP-D-xylose synthase 1 OS=Arabidopsis thaliana GN=AXS1 PE=1 SV=1	"sp|Q9ZUY6|AXS1_ARATH,sp|Q9SGE0|AXS2_ARATH"	"1066.53322,1684.856112,1493.705752,1423.541012,1579.6418905,1537.752304,1071.574014,1452.707859,937.52283,959.466236,1685.807836,1444.6578,1428.661636,861.496582,1305.686298,1148.607738,1660.816176"	"LLTETPHK,VSGEGAIESPTVDVSSK,HLLEPDTVEWSGR"	AXS1	http://www.uniprot.org/uniprot/Q9ZUY6	42.416452
26607028	26242716	25158540	26357884	21401304	25056552	25325512	21675196	26374176	29571384	29277980	25931552	tr|F4J9G2|F4J9G2_ARATH	F4J9G2	1	17	17	73934.034	"99.6,99.7,99.7,99.3,99.7,99.7,99.7,99.7,99.7,99.7,99.7,99.7,99.2,99.7,99.7,99.7,99.7"	"AAVIAIDLLR,AFSTLDQTGDVAGDK,ASFDDFSSGLK,ASVDDFSSGVK,ESFSSSLNQGENAVK,FSSFSTGLK,HESKPSDETSESLQDASSSPEEALNNVDVSEA,ISPDSSVSLPDAK,LETNGVGLPTSPSSSDVR,LGAQAFSWAAGK,NASEVVDSAVNR,NTLESFSSSVTSITK,RPYLMQGGYR | Oxidation [M5],SVLIDVRPEALR,TSSLIDSVESGTNATVK,VVVMDADGTR,YSSVTLPEVDGDVK"	tr|F4J9G2|F4J9G2_ARATH Rhodanese/cell cycle control phosphatase superfamily protein OS=Arabidopsis thaliana GN=At3g59780 PE=4 SV=1	tr|F4J9G2|F4J9G2_ARATH	"1053.654886,1523.710286,1172.534732,1110.51955,1595.743076,972.49162,3387.47352,1314.666682,1814.902088,1205.617364,1259.611014,1599.801072,1255.612929,1366.793505,1707.851814,1061.517282,1507.740356"	"YSSVTLPEVDGDVK,NASEVVDSAVNR,FSSFSTGLK"	At3g59780	http://www.uniprot.org/uniprot/F4J9G2	34.402332
920500	915646	763748	1.3044e+06	1.21814e+06	801355	919401	1.26506e+06	1.47533e+06	967285	733332	715432	tr|F4K4Q2|F4K4Q2_ARATH	F4K4Q2	2	17	1	143388.908	"99.7,99.7,97.8,96.0,97.4,99.7,97.9,93.5,99.7,99.0,99.7,99.7,98.9,99.3,99.7,99.7,99.0"	"APYSAVITHGFVLDEK,CWNYSGQVGSFSDHPTLCGR | Carbamidomethyl [C1 C18],DAPAYGADVMR,DAPAYGADVMR | Oxidation [M10],DCPVVIGGDYITTESGTGLVHTAPGHGQEDYATGLK | Carbamidomethyl [C2],FTEEAGQFR,LLEMSEAK,LWEENQVFK,LYTGGTSSFTR,NEADTLQR,NIQECYENYQFFK | Carbamidomethyl [C5],SLGNVVDPR,TFLGSDLENCR | Carbamidomethyl [C10],VLQSLDQEVR,YGLPLVSPVDDEGK,YLLGNLHDWR,YTHPIDNR"	tr|F4K4Q2|F4K4Q2_ARATH Isoleucyl-tRNA synthetase OS=Arabidopsis thaliana GN=OVA2 PE=3 SV=1	"sp|Q8RXK8|SYIM_ARATH,tr|F4K4Q2|F4K4Q2_ARATH"	"1745.8988295,2326.983129,1164.52299,1180.517816,3714.747864,1083.498,919.468332,1191.592694,1188.577208,945.454734,1781.773278,955.508904,1310.592916,1185.635906,1487.74785,1285.657332,1014.48879"	YTHPIDNR	OVA2	http://www.uniprot.org/uniprot/F4K4Q2	15.871775
92845224	41698384	74569072	68181760	71320024	70179592	56745760	56131532	41293892	68661488	39552960	58844440	tr|Q8RY94|Q8RY94_ARATH	Q8RY94	2	17	12	59756.662	"99.7,99.7,99.7,99.7,99.0,99.7,99.7,99.7,99.0,99.0,99.2,99.7,94.5,99.7,99.7,99.7,99.7"	"AGEIGSSTMPHK,AGEIGSSTMPHK | Oxidation [M9],ANAELTFLSMK,ANAELTFLSMK | Oxidation [M10],AVNEETIR,CESQPEIAK | Carbamidomethyl [C1],DLEMSNLTALSPLDGR | Oxidation [M4],DLTDSTVLR,EMANFAVR,EMANFAVR | Oxidation [M2],GLELPSEAK,LSNIPEVTEVPSFSK,NFAYVPMLSR,NMGGALGHSLLAYK | Oxidation [M2],THGQPATPTTLGK,VNPIDFENSEGNLGK,VSCSVSTTTDSPK | Carbamidomethyl [C3]"	tr|Q8RY94|Q8RY94_ARATH Adenylosuccinate lyase OS=Arabidopsis thaliana GN=At4g18440 PE=1 SV=1	"tr|Q8RY94|Q8RY94_ARATH,tr|Q8GUN7|Q8GUN7_ARATH"	"1213.5757725,1229.568663,1223.622562,1239.616214,930.477074,1060.485748,1746.846014,1018.530418,936.448912,952.443744,942.502212,1645.856837,1196.600634,1446.727994,1307.6835545,1631.7793645,1367.623544"	"GLELPSEAK,AVNEETIR,EMANFAVR"	At4g18440	http://www.uniprot.org/uniprot/Q8RY94	30.223881
120330624	127037120	121101880	129717960	116538328	123140840	129343960	101295616	132261432	116055032	137396432	122214384	tr|Q9LF98|Q9LF98_ARATH	Q9LF98	3	17	11	38539.335	"99.7,99.0,99.7,99.7,99.7,99.7,99.7,99.7,99.7,99.7,99.7,99.7,99.7,99.7,99.2,99.7,99.7"	"AAQEALYVR,ALQQSTLK,ALSDHHVLLEGTLLKPNMVTPGSDSPK,ANSEATLGTYK,EGGVLPGIK,FADELIANAAYIGTPGK,GILAADESTGTIGK,GTVELAGTDGETTTQGLDGLGDR,IGENEPSEHSIHENAYGLAR,KPWSLSFSFGR,LASINVENVETNR,LASINVENVETNRR,LGDGAAESLHVK,NLNAMNQLK,NLNAMNQLK | Oxidation [M5],RLASINVENVETNR,VSPEVIAEHTVR"	tr|Q9LF98|Q9LF98_ARATH Fructose-bisphosphate aldolase OS=Arabidopsis thaliana GN=F8J2_100 PE=1 SV=1	"tr|Q9LF98|Q9LF98_ARATH,tr|O65581|O65581_ARATH,tr|Q9SJQ9|Q9SJQ9_ARATH"	"1019.54058,887.507435,2855.484416,1153.56118,868.502168,1749.89296533,1331.692852,2262.063,2222.035267,1310.677713,1457.747294,1613.848674,1195.620076,1044.53871,1060.533372,1613.848662,1335.7144795"	"ANSEATLGTYK,LASINVENVETNR,AAQEALYVR"	F8J2	http://www.uniprot.org/uniprot/Q9LF98	55.027933
1.96652e+06	1.6985e+06	1.28524e+06	2.10007e+06	1.55708e+06	1.95482e+06	1.5105e+06	1186410	1.82653e+06	1.59907e+06	2.02932e+06	1.76134e+06	tr|Q9LVT8|Q9LVT8_ARATH	Q9LVT8	4	17	3	37998.985	"99.6,99.5,99.0,99.7,99.7,99.7,99.7,98.7,99.7,99.7,99.7,99.7,99.7,99.7,99.7,99.7,99.7"	"AAAAVQPPK,EAAAPAIGDTAQFPSLG,EMTLEEYEK,EMTLEEYEK | Oxidation [M2],FPTKPAPPSQAVR,GGVANGESGDVERPPR,GNWGTTEDDIPPTSEEPTTEVEK,KNTDEEIFIK,NNDAPGNENGFSGGYR,NNDAPGNENGFSGGYR | Deamidated [N2],NNDAPGNENGFSGGYR | Deamidated [N9],NTDEEIFIK,QGGEDETPEAK,RGGVANGESGDVERPPR,SLSINEFLKPADGK,VFESMQQLSNK,VFESMQQLSNK | Oxidation [M5]"	tr|Q9LVT8|Q9LVT8_ARATH At5g47210 OS=Arabidopsis thaliana GN=At5g47210 PE=1 SV=1	"tr|O23523|O23523_ARATH,tr|Q9LVT8|Q9LVT8_ARATH,tr|O23593|O23593_ARATH,tr|A8MQD7|A8MQD7_ARATH"	"851.486294,1614.788204,1170.510504,1186.506294,1394.7672365,1595.764845,2531.118564,1235.640006,1667.692502,1668.677106,1668.67512,1107.544872,1159.496466,1751.8656135,1517.809022,1309.633676,1325.62799"	"KNTDEEIFIK,EAAAPAIGDTAQFPSLG,NNDAPGNENGFSGGYR | Deamidated [N2]"	At5g47210	http://www.uniprot.org/uniprot/Q9LVT8	42.016807
54461252	72895312	60466988	55474416	47684988	58551488	55614352	51200336	63386612	51135984	51258944	50602368	sp|F4I7I0|ALAT1_ARATH	F4I7I0	3	16	10	59820.369	"99.1,99.4,99.7,99.7,99.5,99.3,99.7,99.7,95.1,99.7,99.7,99.0,95.4,99.7,99.0,99.7"	"AEGAMYLFPCLHLPQK | Carbamidomethyl [C10] Oxidation [M5],AIAAAEAEK,ALAVINPGNPTGQVLSEENQR,ATGAYSHSQGIK,ATGIVVVPGSGFR,CTILPQEDK | Carbamidomethyl [C1],DAIADGIEAR,DLALVSFQSVSK,GEIVNIAQK,GGYMEVTGFTSDVR,GGYMEVTGFTSDVR | Oxidation [M4],ILDQIPGR,LEGVTCNR | Carbamidomethyl [C6],QVPGTWHFR,TLEEALNK,TLEEALNKLEGVTCNR | Carbamidomethyl [C14]"	"sp|F4I7I0|ALAT1_ARATH Alanine aminotransferase 1, mitochondrial OS=Arabidopsis thaliana GN=ALAAT1 PE=1 SV=1"	"sp|F4I7I0|ALAT1_ARATH,sp|Q9LVA0|BAG7_ARATH,sp|Q9LDV4|ALAT2_ARATH"	"1889.917336,872.45975,2206.1352245,1218.5980905,1258.702162,1102.53285,1029.509382,1292.69769,970.54483,1517.680496,1533.676252,910.523916,947.449118,1126.567614,916.486,1845.92553"	"ATGIVVVPGSGFR,ILDQIPGR,ALAVINPGNPTGQVLSEENQR"	ALAAT1	http://www.uniprot.org/uniprot/F4I7I0	29.097606
20825372	55832864	35349856	34744712	17728872	45686644	22333208	18960384	55755732	60545856	30329944	13823581	sp|K1C10_HUMAN|	K1C10_HUMAN	1	16	16	59517.949	"99.7,99.7,94.6,99.7,99.5,99.7,99.7,98.1,99.7,99.7,99.0,99.7,99.7,99.5,99.7,99.0"	"AETECQNTEYQQLLDIK | Carbamidomethyl [C5],ALEESNYELEGK,DAEAWFNEK,ELTTEIDNNIEQISSYK,ELTTEIDNNIEQISSYK | Deamidated [N8],GSLGGGFSSGGFSGGSFSR,LENEIQTYR,LKYENEVALR,QSVEADINGLR,QSVEADINGLRR,SEITELRR,SGGGGGGGGCGGGGGVSSLR | Carbamidomethyl [C10],SLLEGEGSSGGGGR,VTMQNLNDR,VTMQNLNDR | Oxidation [M3],YENEVALR"	sp|K1C10_HUMAN|	sp|K1C10_HUMAN|	"2081.957258,1380.640078,1108.481588,1995.963746,1996.94295,1706.763942,1164.576458,1233.671158,1200.609486,1356.711027,1002.545337,1548.670046,1261.589342,1089.52378,1105.517576,992.492538"	"LENEIQTYR,VTMQNLNDR,ALEESNYELEGK"		http://www.uniprot.org/uniprot/K1C10_HUMAN	26.306914
32146256	46831560	28801332	44484428	33129308	45383016	37598416	29322872	57271168	47917672	40171952	34414292	sp|K22E_HUMAN|	K22E_HUMAN	1	16	16	65864.53	"99.0,99.7,99.7,97.5,99.7,99.7,99.7,99.7,99.7,98.1,99.6,99.1,99.7,99.6,99.7,98.8"	"DYQELMNVK | Oxidation [M6],GFSSGSAVVSGGSR,GGSGGGGSISGGGYGSGGGSGGR,GGSISGGGYGSGGGK,GGSSSGGGYGSGGGGSSSVK,GSSSGGGYSSGSSSYGSGGR,HGGGGGGFGGGGFGSR,KYEDEINKR,LNDLEEALQQAK,SKEEAEALYHSK,SLVGLGGTK,STSSFSCLSR | Carbamidomethyl [C7],TAAENDFVTLK,TSQNSELNNMQDLVEDYK,TSQNSELNNMQDLVEDYK | Oxidation [M10],YLDGLTAER"	sp|K22E_HUMAN|	sp|K22E_HUMAN|	"1154.528672,1253.599804,1740.740338,1196.551932,1587.669818,1739.6973,1319.575339,1193.604114,1370.703436,1390.670742,830.487226,1130.502786,1207.608156,2126.94575,2142.93970333,1036.519984"	"SLVGLGGTK,TAAENDFVTLK,YLDGLTAER"		http://www.uniprot.org/uniprot/K22E_HUMAN	32.093023
25558548	22311340	22823704	23778432	20831212	19974352	22517776	16883620	22365856	12958959	24840056	22824288	sp|O04630|SYTM1_ARATH	O04630	1	16	16	80935.432	"98.4,99.7,98.1,95.0,99.7,99.7,99.3,97.3,99.7,99.7,99.7,99.0,97.1,99.7,99.6,99.7"	"AVLGSVER,CGPLVDLCR | Carbamidomethyl [C1 C8],DQALEMFSENNFK,DQALEMFSENNFK | Oxidation [M6],FNLEYAAEDEAK,GPHIPNTSFVK,IDITVSDAMNR,LADFGVLHR,LFEQIQANQLENLK,NEASGALSGLTR,QAIVCPISEK | Carbamidomethyl [C5],SRPVMIHR,VFGFTYELK,VYGISYPDQK,YLGDLETWDK,YLQFLEEAKK"	"sp|O04630|SYTM1_ARATH Threonine--tRNA ligase, mitochondrial 1 OS=Arabidopsis thaliana GN=THRRS PE=2 SV=3"	sp|O04630|SYTM1_ARATH	"829.46503,1088.51151,1571.694112,1587.686146,1398.630004,1195.635609,1233.600912,1026.561752,1686.894132,1174.59373,1143.595835,994.54866,1102.570274,1168.575148,1238.58161,1267.681128"	"NEASGALSGLTR,AVLGSVER,QAIVCPISEK | Carbamidomethyl [C5]"	THRRS	http://www.uniprot.org/uniprot/O04630	22.002821
265405760	253832192	281471360	280120256	239518688	301189056	269039872	261824784	268091504	268506784	251114384	309597376	sp|O65396|GCST_ARATH	O65396	1	16	16	44444.265	"99.7,99.7,99.7,99.7,95.7,99.7,99.7,99.7,99.7,99.7,98.8,98.5,99.7,99.7,99.7,99.7"	"DKDLAHIEEHMK,DLAHIEEHMK,DSIMDSTVNCR | Carbamidomethyl [C10],DSIMDSTVNCR | Carbamidomethyl [C10] Oxidation [M4],ENGSLFDVAHMCGLSLK | Carbamidomethyl [C12],ENGSLFDVAHMCGLSLK | Carbamidomethyl [C12] Oxidation [M11],GGDVSWHIHDER,GKPYEGSITK,IGEITSGGFSPNLK,MVPFAGWSMPIQYK | Oxidation [M1 M9],NIAMGYVK,NIAMGYVK | Oxidation [M4],TALYDFHVAHGGK,TGYTGEDGFEISVPDEHAVDLAK,VGFFSSGPPAR,VTDEHIYLVVNAGCR | Carbamidom…	"sp|O65396|GCST_ARATH Aminomethyltransferase, mitochondrial OS=Arabidopsis thaliana GN=GDCST PE=2 SV=1"	sp|O65396|GCST_ARATH	"1464.70330767,1221.581057,1296.543466,1312.538781,1876.881186,1892.870107,1406.63266367,1078.5652585,1418.73948,1685.794641,894.463214,910.459304,1414.69925433,2449.1294005,1120.566952,1744.856876"	"VGFFSSGPPAR,IGEITSGGFSPNLK,TGYTGEDGFEISVPDEHAVDLAK"	GDCST	http://www.uniprot.org/uniprot/O65396	39.215686
12893973	10802278	10398374	15838533	15433970	14601101	11085936	8520073	12031066	8977625	12743321	10689035	sp|O82392|THIC_ARATH	O82392	1	16	16	71985.836	"94.4,99.0,99.7,99.7,99.7,99.7,99.7,99.7,99.7,99.7,98.9,99.1,99.7,99.7,99.7,97.5"	"DVQVMNEGPGHVPMHK,EHLGLPNR,EKLDPEFVR,HLELEPMIVGR,NSAVPVGTVPIYQALEK,QGIITEEMLYCATR | Carbamidomethyl [C11],QGMDAMSEEFNIAK,QGMDAMSEEFNIAK | Oxidation [M3 M6],QGMDAMSEEFNIAK | Oxidation [M6],QHPHAQAWDDALSK,VAHFCSMCGPK | Carbamidomethyl [C5 C8] Oxidation [M7],VHLSGGEPAFDNYDTSGPQNVNAHIGLAK,VNANIGNSAVASSIEEEVYK,YAEENGYGSAEEAIR,YAEENGYGSAEEAIR | Deamidated [N5],YTQMYYAK | Oxidation [M4]"	"sp|O82392|THIC_ARATH Phosphomethylpyrimidine synthase, chloroplastic OS=Arabidopsis thaliana GN=THIC PE=1 SV=1"	sp|O82392|THIC_ARATH	"1773.829116,934.498032,1131.59229,1292.690979,1784.967759,1683.7962925,1569.680234,1601.670252,1585.674348,1602.7545545,1308.540219,3007.441724,2093.0293105,1657.721124,1658.708524,1082.474194"	"EKLDPEFVR,YAEENGYGSAEEAIR,VNANIGNSAVASSIEEEVYK"	THIC	http://www.uniprot.org/uniprot/O82392	28.881988
1047205760	1039851456	970297536	953708352	845371008	935388736	1131854464	982831872	1114881408	1035076032	1067333760	993816448	sp|P25856|G3PA1_ARATH	P25856	2	16	9	42489.019	"99.7,99.7,99.7,99.7,95.8,99.0,99.7,99.7,99.7,99.0,99.7,99.7,99.0,99.7,99.7,99.7"	"AVALVLPNLK,CSDFSTTIDSSLTMVMGDDMVK | Carbamidomethyl [C1] Oxidation [M14 M16 M20],CSDFSTTIDSSLTMVMGDDMVK | Carbamidomethyl [C1] Oxidation [M14 M16],DSPLDIIAINDTGGVK,GILDVCDEPLVSVDFR | Carbamidomethyl [C6],IIQVVSNR,KDSPLDIIAINDTGGVK,KTFAEEVNAAFR,KVIITAPGK,NPSLLPWK,TFAEEVNAAFR,VIAWYDNEWGYSQR,VIITAPGK,VPTPNVSVVDLVVQVSK,VVDLADIVANNWK,YDSTLGIFDADVKPSGETAISVDGK"	"sp|P25856|G3PA1_ARATH Glyceraldehyde-3-phosphate dehydrogenase GAPA1, chloroplastic OS=Arabidopsis thaliana GN=GAPA1 PE=1 SV=3"	"sp|P25856|G3PA1_ARATH,sp|Q9LPW0|G3PA2_ARATH"	"1036.6654425,2487.019242,2471.0241245,1626.847742,1832.891792,927.551274,1754.940445,1381.698407,925.596179,953.533919,1253.6041095,1785.8105015,797.501345,1779.012926,1455.770448,2584.25340425"	"IIQVVSNR,VIITAPGK,NPSLLPWK"	GAPA1	http://www.uniprot.org/uniprot/P25856	43.181818
30724940	38748720	29388644	39128916	28920160	30773808	42448572	34975068	35245864	30017032	32919384	32067244	sp|P41376|IF4A1_ARATH	P41376	4	16	2	46703.946	"99.7,99.7,99.7,99.7,98.9,99.7,99.7,99.7,99.7,99.7,99.0,99.7,99.7,99.0,99.7,99.7"	"AGSAPEGTQFDAR,ALGDYLGVK,DHTVSATHGDMDQNTR,DHTVSATHGDMDQNTR | Oxidation [M11],ELAQQIEK,GIYAYGFEKPSAIQQR,GLDVIQQAQSGTGK,GVAINFVTR,ILQAGVHVVVGTPGR,KGVAINFVTR,KVDWLTDK,MFVLDEADEMLSR | Oxidation [M10],MFVLDEADEMLSR | Oxidation [M1],QFYVNVEK,RDELTLEGIK,VLITTDLLAR"	sp|P41376|IF4A1_ARATH Eukaryotic initiation factor 4A-1 OS=Arabidopsis thaliana GN=TIF4A-1 PE=1 SV=1	"sp|P41377|IF4A2_ARATH,sp|Q94A52|RH2_ARATH,tr|A8MRZ7|A8MRZ7_ARATH,sp|P41376|IF4A1_ARATH"	"1305.593816,934.512564,1783.7538395,1799.743216,957.513086,1826.9325955,1400.72498,975.550336,1501.8726735,1103.645258,1003.533406,1570.69854,1570.697758,1025.518154,1172.640231,1113.675846"	"GVAINFVTR,AGSAPEGTQFDAR"	TIF4A	http://www.uniprot.org/uniprot/P41376	36.407767
64264728	72546952	73987968	60037620	50667596	50628464	63668476	49176440	60074432	44895384	47458468	53561276	sp|P46645|AAT2_ARATH	P46645	2	16	13	44266.121	"99.7,99.7,98.4,99.7,99.7,98.8,99.7,94.8,99.7,99.7,99.7,99.7,99.7,99.7,99.7,99.0"	"AEQQLVNDPSR,APEDPILGVTVAYNNDPSPVK,EQVEFMTK,INLGVGAYR,ISMAGLSSK,KAEQQLVNDPSR,LILGADSPAITESR,NMGLYGER | Oxidation [M2],QQLFEAIQAR,SSDMYNNWTIELK,SSDMYNNWTIELK | Oxidation [M4],TEEGKPLVLDVVR,TFVADGGECLIAQSYAK | Carbamidomethyl [C9],TVPHLADAMHAAVTR,VGALSIVCK | Carbamidomethyl [C8],VTTVQCLSGTGSLR | Carbamidomethyl [C6]"	"sp|P46645|AAT2_ARATH Aspartate aminotransferase, cytoplasmic isozyme 1 OS=Arabidopsis thaliana GN=ASP2 PE=1 SV=2"	"sp|P46645|AAT2_ARATH,sp|P46644|AAT3_ARATH"	"1255.615228,2195.10679,1010.4737,961.534466,892.468904,1383.709474,1441.776308,954.422886,1202.640794,1599.721952,1615.721078,1453.813742,1828.868842,1588.8148315,945.531614,1477.753762"	"INLGVGAYR,QQLFEAIQAR,LILGADSPAITESR"	ASP2	http://www.uniprot.org/uniprot/P46645	42.469136
100142344	99008248	106341032	123171200	106870712	120405360	98886752	97154792	105653104	121792784	105337984	107706120	sp|P47998|CYSK1_ARATH	P47998	3	16	11	33804.712	"99.7,99.7,99.7,99.7,99.7,99.6,99.7,99.7,99.7,96.6,95.3,99.7,99.7,99.7,99.7,99.7"	"EGLLVGISSGAAAAAAIK,IDGFVSGIGTGGTITGAGK,IGFSMISDAEK,IGFSMISDAEK | Oxidation [M5],IHYETTGPEIWK,LAQRPENAGK,LEMMEPCSSVK | Carbamidomethyl [C7],LEMMEPCSSVK | Carbamidomethyl [C7] Oxidation [M3 M4],LEMMEPCSSVK | Carbamidomethyl [C7] Oxidation [M3],LEMMEPCSSVK | Carbamidomethyl [C7] Oxidation [M4],LIITMPASMSTER | Oxidation [M5 M9],LYGVEPVESAILSGGKPGPHK,TPNGYMLQQFENPANPK,TPNGYMLQQFENPANPK | Deamidated […	sp|P47998|CYSK1_ARATH Cysteine synthase 1 OS=Arabidopsis thaliana GN=OASA1 PE=1 SV=2	"sp|P47998|CYSK1_ARATH,sp|Q9SXS7|CYSD2_ARATH,sp|Q9S6Z7|CYSD1_ARATH"	"1597.904276,1706.88381867,1196.574098,1212.569404,1472.729856,1082.579886,1309.57113,1341.560604,1325.56618,1325.565382,1480.726376,2134.14258767,1947.9141525,1948.898298,1963.9106795,1284.6711435"	"YLSTVLFDATR,IDGFVSGIGTGGTITGAGK,IHYETTGPEIWK"	OASA1	http://www.uniprot.org/uniprot/P47998	44.409938
101311456	103689592	128554240	150920960	118924240	140341984	105708568	94807512	110616048	98177352	113903104	123837696	sp|Q05758|ILV5_ARATH	Q05758	1	16	16	63811.685	"99.7,99.7,99.7,99.7,99.7,99.7,99.7,99.2,99.7,99.7,99.7,99.7,99.7,99.7,99.7,99.7"	"APVSLDFETSVFK,APVSLDFETSVFKK,EGLPAFPMGNIDQTR,EGLPAFPMGNIDQTR | Oxidation [M8],EINGAGINASFAVHQDVDGR,GVSFMVDNCSTTAR | Carbamidomethyl [C9],GVSFMVDNCSTTAR | Carbamidomethyl [C9] Oxidation [M5],NISVVAVCPK | Carbamidomethyl [C8],NTVECITGTISR | Carbamidomethyl [C5],QIGVIGWGSQGPAQAQNLR,TISTQGMLAVYNSLSEEGKK | Oxidation [M7],VSLAGYEEYIVR,YTENGMSEDLAYK,YTENGMSEDLAYK | Deamidated [N4],YTENGMSEDLAYK | Deami…	"sp|Q05758|ILV5_ARATH Ketol-acid reductoisomerase, chloroplastic OS=Arabidopsis thaliana GN=At3g58610 PE=2 SV=2"	sp|Q05758|ILV5_ARATH	"1438.734562,1566.829068,1644.792266,1660.7873495,2068.9841775,1543.6741885,1559.67039,1085.589988,1349.66214,1979.032942,2171.076606,1397.7194095,1519.650036,1520.63295,1536.62547,1535.644704"	"VSLAGYEEYIVR,NISVVAVCPK | Carbamidomethyl [C8],QIGVIGWGSQGPAQAQNLR"	At3g58610	http://www.uniprot.org/uniprot/Q05758	25.211506
19167532	16709190	18560032	28779488	23984628	22935088	23722524	18911312	24645216	26839628	29698464	29639972	sp|Q39085|DIM_ARATH	Q39085	1	16	16	65393.446	"94.6,96.9,99.7,99.7,99.7,99.6,99.7,99.7,99.7,99.7,99.7,99.7,99.6,99.7,99.7,99.7"	"AIGTFMSVYYK | Oxidation [M6],EAEQAHLETAYAEAD,EMEVYPIWLCPHK | Carbamidomethyl [C10],EMEVYPIWLCPHK | Carbamidomethyl [C10] Oxidation [M2],GEEFDGSEAVR,GQFVEYIPTR,GQIYPEPGFEYENR,HFEVDLGEFR,KPWIAVGMR,MFNGELYEECR | Carbamidomethyl [C10],MFNGELYEECR | Carbamidomethyl [C10] Oxidation [M1],SDLQTPLVRPK,VEPLVNMGQISR,VEPLVNMGQISR | Oxidation [M7],VGDALEWVHR,WLIENHGFQPQYAVSELDEK"	sp|Q39085|DIM_ARATH Delta(24)-sterol reductase OS=Arabidopsis thaliana GN=DIM PE=1 SV=2	sp|Q39085|DIM_ARATH	"1294.626246,1646.705676,1700.80584,1716.799038,1194.513922,1208.620748,1697.7683325,1247.5927835,1056.590124,1446.590708,1462.584995,1252.7140485,1341.706168,1357.702174,1180.59927,2402.150961"	"VEPLVNMGQISR,GQIYPEPGFEYENR,VGDALEWVHR"	DIM	http://www.uniprot.org/uniprot/Q39085	27.98574
445319328	342413376	451974528	511440192	498653760	518049920	320236224	276946752	354083520	335038336	374359808	382253632	sp|Q42547|CATA3_ARATH	Q42547	2	16	0	56694.637	"99.7,99.7,99.7,99.0,99.7,99.7,99.7,99.7,99.7,99.7,99.0,99.0,99.7,99.6,99.7,99.7"	"DEEINYYPSK,DGIQFPDVVHALKPNPK,DLHDAIASGNYPEWK,FSTVVHER,GPVLLEDYHLIEK,HMEGFGVHTYTLIAK,HMEGFGVHTYTLIAK | Oxidation [M2],IFAYGDTQR,LFIQTMDPADEDK,LFIQTMDPADEDK | Oxidation [M6],NLTDEEAK,TNIQEYWR,VPTPTNSYTGIR,WVEILSEPR,YRPSSAYNAPFYTTNGGAPVSNNISSLTIGER,YRPSSAYNAPFYTTNGGAPVSNNISSLTIGER | Deamidated [N15]"	sp|Q42547|CATA3_ARATH Catalase-3 OS=Arabidopsis thaliana GN=CAT3 PE=1 SV=3	"tr|B9DG18|B9DG18_ARATH,sp|Q42547|CATA3_ARATH"	"1256.55686,1874.004449,1714.795494,973.497888,1524.818421,1702.8430815,1718.844048,1069.519588,1521.701852,1537.695474,918.429004,1108.53026,1304.672506,1127.5965,3403.639324,3404.629368"	"VPTPTNSYTGIR,WVEILSEPR,DEEINYYPSK"	CAT3	http://www.uniprot.org/uniprot/Q42547	34.349593
43497040	46904372	43421968	43879888	41178612	46390332	49150636	52009324	38943640	54838100	44257160	47604268	sp|Q56WK6|PATL1_ARATH	Q56WK6	2	16	15	64045.52	"99.7,99.7,99.7,99.4,99.7,99.7,99.7,99.7,99.7,99.7,99.7,99.7,94.8,99.7,99.7,99.7"	"AIDFSNPEAK,EEETVVVAEK,EEVAAPVSDEK,EFTAPVTPVK,EFTAPVTPVKEEK,EVTIPTPVAEKEEVAAPVSDEK,IDELVESGEEVSEFEK,IGSTDEPVITDSFK,IVITIDNQTSK,MVFAHGVDK,QFEDNYPEFAAK,SADVAAAPVVK,SSEAAPVETK,SSFVFVSDFR,VEEEKPAVPAAEEEK,VVVLTAEEVQK"	sp|Q56WK6|PATL1_ARATH Patellin-1 OS=Arabidopsis thaliana GN=PATL1 PE=1 SV=2	"sp|Q56ZI2|PATL2_ARATH,sp|Q56WK6|PATL1_ARATH"	"1090.52961,1131.56561,1172.556052,1087.590846,1473.771117,2337.19344,1837.847868,1507.740094,1230.68135,1002.495264,1457.646351,1026.570772,1017.505806,1189.576416,1653.809127,1213.690662"	"VVVLTAEEVQK,SADVAAAPVVK,EFTAPVTPVK"	PATL1	http://www.uniprot.org/uniprot/Q56WK6	30.366492
31512500	36764752	32668736	38359152	36531060	39667740	41396488	30234212	35706748	31648316	35923220	39173952	sp|Q84WV1|TCPG_ARATH	Q84WV1	1	16	16	60338.724	"98.9,99.7,99.3,99.7,99.7,99.7,99.7,99.7,95.3,99.7,97.8,99.7,99.7,99.7,98.8,99.7"	"DFINEVER,EEDWEVLLK,ELDVAHPAAK,FKPDLVITEK,GLSDLACHYFSK | Carbamidomethyl [C7],HANGENAWTGIDGNTGAIADMK,IDDIVSGIK,IILLDCPLEYK | Carbamidomethyl [C6],IWDSYNVK,KGENQTNAELVR,LVPGGGATELTVSATLK,MHAPVLVLSDSLK,TAIEAACMLLR | Carbamidomethyl [C7],TLAQNCGVNVIR | Carbamidomethyl [C6],TMTALQGK,VPGGQFEDSEVLK"	sp|Q84WV1|TCPG_ARATH T-complex protein 1 subunit gamma OS=Arabidopsis thaliana GN=CCT3 PE=1 SV=1	sp|Q84WV1|TCPG_ARATH	"1020.487846,1159.575944,1049.550522,1188.675425,1396.645428,2242.002753,958.533796,1375.741772,1023.502788,1357.695006,1612.903596,1408.774314,1247.634912,1343.697672,848.443402,1403.692572"	"IDDIVSGIK,IILLDCPLEYK | Carbamidomethyl [C6],TLAQNCGVNVIR | Carbamidomethyl [C6]"	CCT3	http://www.uniprot.org/uniprot/Q84WV1	33.333333
71940000	65863328	64828756	67893064	57716176	63223924	62830092	55517144	62020324	62970992	57085048	66730660	sp|Q8H0U5|TIC62_ARATH	Q8H0U5	1	16	16	68340.766	"99.7,99.7,99.7,98.3,99.4,99.7,99.7,99.7,99.6,99.7,99.4,99.7,99.0,99.0,99.7,98.8"	"AGSLVQSVK,ASSVVTEASPTNLNSK,EAASVEDNSELPGGNNDVLK,EISDITGPYR,ERPLSPYAR,EVDATQVPVEANVVPVPDSTSNVPVVEVK,IVEVVAETTAPLTPIEK,KSDSLSPGPTDSDTDK,LEIVECDLEK | Carbamidomethyl [C6],LQNTDEGTQPVEK,MRPLSPYAIYADLKPPTSPTPASTGPK,NLVDAATSAK,NPQLSFSK,RPYVPPPK,SDSLSPGPTDSDTDK,YENLKPPSSPSPTASSTR"	"sp|Q8H0U5|TIC62_ARATH Protein TIC 62, chloroplastic OS=Arabidopsis thaliana GN=TIC62 PE=1 SV=1"	sp|Q8H0U5|TIC62_ARATH	"887.50746,1603.804986,2056.95457433,1149.567208,1087.57659,3016.5670325,1809.01308,1648.7429645,1246.61102,1457.699018,2855.491782,988.519368,919.476124,952.54881,1520.647208,1917.943684"	"NLVDAATSAK,LEIVECDLEK | Carbamidomethyl [C6],EISDITGPYR"	TIC62	http://www.uniprot.org/uniprot/Q8H0U5	34.321373
18466812	18791632	17564408	19067164	15469241	18703764	18082788	16082165	17894388	19094424	16341911	17911008	sp|Q8H103|G6PIP_ARATH	Q8H103	1	16	16	67047.6	"99.7,99.7,99.6,96.3,98.3,99.7,99.7,98.7,99.7,99.7,99.7,99.7,99.7,99.7,99.7,99.7"	"AAAEVLALQK,AVGLYASIVNINAYHQPGVEAGK,CHAPEEIEMIYK | Carbamidomethyl [C1],DMVVLPYK,DSLLLFSR,EFDLDGNTVNQGLTVYGNK,ELLKDPDALWK,FPMYDWVGGR | Oxidation [M3],GSIANPDEGR,GSTDQHAYIQQLR,IKPPSSPEGR,QGVAITQENSLLDNTAR,VLIAEGNCGSPR | Carbamidomethyl [C8],VLSVLNEATCK | Carbamidomethyl [C10],YLDWFYQQK,YLQQLVMESLGK | Oxidation [M7]"	"sp|Q8H103|G6PIP_ARATH Glucose-6-phosphate isomerase 1, chloroplastic OS=Arabidopsis thaliana GN=PGI1 PE=1 SV=1"	sp|Q8H103|G6PIP_ARATH	"1012.592282,2370.233394,1518.685137,963.509518,949.522818,2082.98580167,1326.718332,1242.547566,1014.472948,1515.742831,1066.577019,1828.92775,1271.62834,1232.64274,1289.609892,1423.737544"	"VLIAEGNCGSPR | Carbamidomethyl [C8],QGVAITQENSLLDNTAR,GSTDQHAYIQQLR"	PGI1	http://www.uniprot.org/uniprot/Q8H103	31.810767
21054352	23695136	24373952	28894192	24156536	25455308	25368344	18811656	25165432	19679632	30304200	27649760	sp|Q94K05|TCPQ_ARATH	Q94K05	1	16	16	58938.786	"99.7,99.7,99.5,99.7,99.7,99.7,99.2,99.7,99.7,99.7,99.7,98.1,99.7,99.7,99.0,99.7"	"AVDDGVNTYK,EYANAEIGLDK,GSTDSILDDLER,GTVLIHSAEQLENYAK,HLSGLDEAVIK,IVPGAAATEIELAQR,LGIDLEEGACK | Carbamidomethyl [C10],LLGGGLHNSCIVR | Carbamidomethyl [C10],MGLHPSEIISGYTK,NEEGGNSISTVVLR,NPTNFNVDNVR,SDAVGSIK,VAVFAGGVDTTATETK,VGMSMQPYGIQSMLK | Oxidation [M3 M5],VWDLFATK,YAESFEFVPK"	sp|Q94K05|TCPQ_ARATH T-complex protein 1 subunit theta OS=Arabidopsis thaliana GN=CCT8 PE=1 SV=1	sp|Q94K05|TCPQ_ARATH	"1080.508534,1221.588184,1319.620334,1771.9099665,1180.645127,1537.8468735,1203.580354,1394.745651,1531.770057,1473.742672,1288.615784,775.407492,1565.792787,1700.792684,978.517474,1215.582922"	"NPTNFNVDNVR,NEEGGNSISTVVLR,IVPGAAATEIELAQR"	CCT8	http://www.uniprot.org/uniprot/Q94K05	35.519126
325798016	275120224	325284800	276240448	264876096	292054240	276556800	487208352	219982352	325993920	210318832	309407392	sp|Q9C5C2|BGL37_ARATH	Q9C5C2	1	16	16	62731.223	"99.0,99.7,99.7,98.0,99.7,99.7,99.7,99.7,99.7,99.7,99.7,99.7,99.7,99.0,99.7,99.7"	"CSQWVDKR | Carbamidomethyl [C1],DLDVMEELGVK,DYADLCFER | Carbamidomethyl [C6],EFFLGWFMEPLTK | Oxidation [M8],GGADLGNGDTTCDSYR | Carbamidomethyl [C12],GGADLGNGDTTCDSYR | Carbamidomethyl [C12] Deamidated [N7],GINEDGINYYSGLIDGLIAR,GLNVWDGFTHR,GMLNVMEHFK,GMLNVMEHFK | Oxidation [M2 M6],GMLNVMEHFK | Oxidation [M2],GMLNVMEHFK | Oxidation [M6],IDYLCSHLCFLR | Carbamidomethyl [C5 C9],IGPVMITR,QDFESDFIFGVAS…	sp|Q9C5C2|BGL37_ARATH Myrosinase 2 OS=Arabidopsis thaliana GN=TGG2 PE=1 SV=1	sp|Q9C5C2|BGL37_ARATH	"1077.50219,1246.61199,1187.492292,1659.802248,1657.6635425,1658.646477,2152.0816345,1300.63101675,1204.5732155,1236.5633455,1220.568231,1220.5678685,1595.758014,885.511116,2422.1020815,1512.712446"	"IGPVMITR,GGADLGNGDTTCDSYR | Carbamidomethyl [C12],DYADLCFER | Carbamidomethyl [C6]"	TGG2	http://www.uniprot.org/uniprot/Q9C5C2	27.787934
7073251	7.85912e+06	6.63023e+06	8.23088e+06	7.7311e+06	7.92719e+06	6788020	8248281	6721029	8811187	7.96846e+06	6.94341e+06	sp|Q9FF55|PDI14_ARATH	Q9FF55	2	16	2	66356.255	"99.7,99.7,98.3,99.7,99.7,99.3,98.9,98.9,98.3,99.7,99.7,99.0,96.2,99.7,99.7,99.6"	"AEDDVNFYQTVNPDVAK,ETAPEIFESAIK,ETAPEIFESAIKK,IDATEENELAQEYR,IFGEDFLNDK,ISHFDGEFVK,IVVGDNFDEIVLDDSK,LALVSVFTR,LIGYTGNEDPK,LIGYTGNEDPKK,MFHLDPESK,QLLLFVTK,RPALVLVK,SIDSLVITK,TSEPITVDTDR,YFFDGEIQSDK"	sp|Q9FF55|PDI14_ARATH Protein disulfide isomerase-like 1-4 OS=Arabidopsis thaliana GN=PDIL1-4 PE=1 SV=1	"tr|F4K0F7|F4K0F7_ARATH,sp|Q9FF55|PDI14_ARATH"	"1923.8836455,1333.676086,1461.771564,1679.763638,1196.571202,1177.576522,1776.88054,1004.602872,1205.592942,1333.687383,1102.512006,960.60082,894.601364,974.564976,1232.588206,1347.59833"	"TSEPITVDTDR,ISHFDGEFVK"	PDIL1	http://www.uniprot.org/uniprot/Q9FF55	26.298157
7290883	6511756	8810286	10787337	7895933	10022753	7.82915e+06	6937011	8.26858e+06	7650644	9147678	11363590	sp|Q9FJA6|RS33_ARATH	Q9FJA6	3	16	4	27457.797	"99.7,99.7,99.7,99.0,98.6,99.7,99.7,99.7,99.0,99.0,99.7,98.4,99.0,97.4,99.7,99.0"	"DGYMVSSGQPTK,DGYMVSSGQPTK | Oxidation [M4],ELAEDGYSGVEVR,ELTSLVQK,EYIDAAVR,FKDGYMVSSGQPTK,FKDGYMVSSGQPTK | Oxidation [M6],FKFPQDSVELYAEK,FVMESGAK,FVMESGAK | Oxidation [M3],GLCAIAQAESLR | Carbamidomethyl [C3],IMLDWDPK,LLGGLAVR,QGPMTPLPDVVIIHTPK,QGPMTPLPDVVIIHTPK | Oxidation [M4],TQNVLGEK"	sp|Q9FJA6|RS33_ARATH 40S ribosomal protein S3-3 OS=Arabidopsis thaliana GN=RPS3C PE=1 SV=1	"sp|Q9SIP7|RS31_ARATH,sp|Q9FJA6|RS33_ARATH,sp|Q9M339|RS32_ARATH"	"1268.570222,1284.56469,1422.6630404,916.52296,935.471696,1543.7336325,1559.729631,1699.845057,867.41583,883.41013,1287.6607385,1016.501042,797.512724,1842.007322,1858.001652,887.47093"	"FKFPQDSVELYAEK,QGPMTPLPDVVIIHTPK | Oxidation [M4],IMLDWDPK"	RPS3C	http://www.uniprot.org/uniprot/Q9FJA6	47.580645
39058368	35649924	41395204	43444044	42153244	43356128	42617848	35518896	36268084	33389864	29793612	33932112	sp|Q9LIK9|APS1_ARATH	Q9LIK9	4	16	7	51458.367	"99.7,97.4,99.7,99.7,99.7,99.0,99.7,99.7,99.7,99.7,99.7,99.7,99.7,99.4,99.7,99.7"	"ADDVPLDWR,DLYDADHGK,DPAGMGHPVEK,DPAGMGHPVEK | Oxidation [M5],ESEFLQTLHFNSLR,HEAADLPR,INAGANFYIVGR,KHEAADLPR,NADAVFAFQLR,NNENPPDGFMCPGGWK | Carbamidomethyl [C11],NNENPPDGFMCPGGWK | Carbamidomethyl [C11] Oxidation [M10],NPILLLHPLGGFTK,NPVHNGHALLMTDTR | Oxidation [M11],VLSMAPGLER | Oxidation [M4],VLVDYYESLTPAGNGR,VLVDYYESLTPAGNGR | Deamidated [N14]"	"sp|Q9LIK9|APS1_ARATH ATP sulfurylase 1, chloroplastic OS=Arabidopsis thaliana GN=APS1 PE=1 SV=1"	"sp|Q9LIK9|APS1_ARATH,sp|O23324|APS3_ARATH,sp|Q9S7D8|APS4_ARATH,sp|Q43870|APS2_ARATH"	"1085.51443,1032.451302,1136.5265755,1152.520494,1719.857808,907.450426,1293.682418,1035.54504,1250.639766,1818.744466,1834.739348,1518.8937425,1690.820949,1087.569678,1752.86804,1753.850657"	"ADDVPLDWR,VLVDYYESLTPAGNGR,ESEFLQTLHFNSLR"	APS1	http://www.uniprot.org/uniprot/Q9LIK9	31.533477
11749119	15015560	13596664	12609342	14087349	13374779	13781137	11927562	13675616	12893351	14104463	13822026	sp|Q9LNU4|PSD3A_ARATH	Q9LNU4	2	16	8	55581.591	"99.6,98.3,99.7,99.7,99.7,99.5,99.7,99.6,99.4,97.3,99.7,99.6,99.7,99.7,99.0,99.7"	"ACSSASIAR | Carbamidomethyl [C2],APIAALGFR,DGAIDATIDHK,EIAALIDTGSYTK,ETGDIYSTNEPQTAFNSR,FLDTFAQDR,GDEHDMEVDTASSATQAAPSK,HMAEEDDDDF,IAFCLNMHNEAVR | Carbamidomethyl [C4],ISLPDVAK,KAPIAALGFR,LLLGEIPER,LNSENPVADAESIVAK,NYLHYNLYDQAEK,QQEEELAK,TIQLEYTDAK"	sp|Q9LNU4|PSD3A_ARATH 26S proteasome non-ATPase regulatory subunit 3 homolog A OS=Arabidopsis thaliana GN=RPN3A PE=1 SV=3	"sp|Q9LNU4|PSD3A_ARATH,sp|Q9LQR8|PSD3B_ARATH"	"921.43321,914.533705,1154.556321,1380.712914,2028.902712,1111.529052,2145.910812,1222.408994,1573.749573,841.489992,1042.628556,1038.60779,1655.83779,1669.774112,973.47135,1180.597148"	"FLDTFAQDR,LNSENPVADAESIVAK,APIAALGFR"	RPN3A	http://www.uniprot.org/uniprot/Q9LNU4	36.47541
20767560	25314848	22401968	27869612	23392348	24958244	28299932	17587260	26147560	22268468	29360040	24728652	sp|Q9M1R2|SYPC_ARATH	Q9M1R2	1	16	16	60754.816	"99.7,99.0,94.5,99.7,99.7,99.0,99.7,99.7,99.7,99.7,99.7,99.7,99.7,99.7,99.6,99.7"	"DHIEGFAPEVAWVTK,DLENDQVR,DNYSPGWK,EFLWQEGHTAFATK,EKDHIEGFAPEVAWVTK,GSLVEHVK,GVQGATSHCLGQNFAK | Carbamidomethyl [C9],IQQNMYEVAK,IQQNMYEVAK | Oxidation [M5],IYEEYLAVPVVK,KDENFGEWYSEVCK | Carbamidomethyl [C13],LILAPWCDEEEVER | Carbamidomethyl [C7],LNQWCNVVR | Carbamidomethyl [C5],MFEINFENEK,MFEINFENEK | Oxidation [M1],VASVQVVVIPVPYK"	"sp|Q9M1R2|SYPC_ARATH Proline--tRNA ligase, cytoplasmic OS=Arabidopsis thaliana GN=At3g62120 PE=2 SV=1"	sp|Q9M1R2|SYPC_ARATH	"1697.840998,987.46158,965.424392,1663.799929,1954.980234,867.481268,1673.7953965,1222.601406,1238.595614,1421.7802045,1789.762202,1757.829018,1187.587284,1299.58002,1315.57472,1496.8963725"	"IYEEYLAVPVVK,LILAPWCDEEEVER | Carbamidomethyl [C7],VASVQVVVIPVPYK"	At3g62120	http://www.uniprot.org/uniprot/Q9M1R2	29.056604
79017408	99834256	78882088	82755920	76598640	79078736	88064344	64659132	84691504	68819272	80116192	83918112	sp|Q9SJ12|ATP7_ARATH	Q9SJ12	1	16	16	27596.521	"99.3,99.7,99.0,99.7,99.6,99.7,99.7,99.7,99.7,99.7,99.7,99.7,99.7,99.4,99.7,99.7"	"ADMFSESQR,ADMFSESQR | Oxidation [M3],EAARPTFK,EEFQDEEMPDVK,EEFQDEEMPDVK | Oxidation [M8],FQAAVDILR,GMDLLVAEFEK | Oxidation [M2],HDIDTETQDIPDAR,IKHDIDTETQDIPDAR,ITLDPEDPAAVK,KEEFQDEEMPDVK,KKEEFQDEEMPDVK,SDAVEAMESQK,SDAVEAMESQK | Oxidation [M7],YEENLELSMAK,YEENLELSMAK | Oxidation [M9]"	"sp|Q9SJ12|ATP7_ARATH Probable ATP synthase 24 kDa subunit, mitochondrial OS=Arabidopsis thaliana GN=At2g21870 PE=1 SV=1"	sp|Q9SJ12|ATP7_ARATH	"1069.449868,1085.444756,918.4914635,1494.618114,1510.61327933,1031.57698,1266.615246,1624.7247565,1865.9118395,1267.66535,1622.712999,1750.809006,1193.523154,1209.516172,1325.617,1341.611844"	"ITLDPEDPAAVK,FQAAVDILR,HDIDTETQDIPDAR"	At2g21870	http://www.uniprot.org/uniprot/Q9SJ12	42.083333
40342824	39113428	43493552	46653372	43871168	43932804	42323596	30426880	47397568	40184448	47191684	47642628	sp|Q9SQI8|ODP24_ARATH	Q9SQI8	2	16	11	50079.754	"99.7,99.7,99.7,98.7,99.5,99.6,91.8,99.0,99.7,99.7,99.7,99.7,99.7,99.7,99.7,99.7"	"AAGMALAQHPVVNASCK | Carbamidomethyl [C16],AAGMALAQHPVVNASCK | Carbamidomethyl [C16] Oxidation [M4],EIFMPALSSTMTEGK,EIFMPALSSTMTEGK | Oxidation [M11],EIFMPALSSTMTEGK | Oxidation [M4],FDAILPPGQGAIMAVGASKPTVVADK,GVTMTALLAK,GVTMTALLAK | Oxidation [M4],ITASDVETAAGIAPSK,LDLYLLSQK,NMIESLSVPTFR,NMIESLSVPTFR | Oxidation [M2],SSIAPPPPPPPPVTAK,SSSSVAEAVVPSPPPVTSSPAPAIAQPAPVTAVSDGPR,VDIESVAGTGPFGR,VGYPVNTDA…	"sp|Q9SQI8|ODP24_ARATH Dihydrolipoyllysine-residue acetyltransferase component 4 of pyruvate dehydrogenase complex, chloroplastic OS=Arabidopsis thaliana GN=LTA2 PE=2 SV=1"	"sp|Q9SQI8|ODP24_ARATH,sp|Q9C8P0|ODP25_ARATH"	"1723.84952233,1739.84455,1640.780424,1656.780292,1656.772724,2552.367915,1003.574394,1019.569012,1529.7947285,1091.622414,1392.7060865,1408.70151,1551.86598275,3579.843861,1403.704898,1766.8728975"	"VGYPVNTDALDALYEK,LDLYLLSQK,ITASDVETAAGIAPSK"	LTA2	http://www.uniprot.org/uniprot/Q9SQI8	39.375
21147000	19888536	21330000	22726824	20209856	24124200	20611348	17392064	22263860	20591392	25795432	21995860	sp|Q9STE8|TC753_ARATH	Q9STE8	1	16	16	89187.688	"99.7,94.4,99.0,99.7,97.8,99.4,99.7,99.7,98.6,99.7,97.1,99.3,99.7,99.7,99.5,99.7"	"DESSHIAANGQR,DESSHIAANGQR | Deamidated [N9],ELETLATCGMFEK | Carbamidomethyl [C8] Oxidation [M10],GGAPTLASFQPGGSVTFEHR,GNPTAVYR,GYNMGELGAAR,LEYVHPYLDGVYNPR,LLPSGGISADGPPTTLSGTGVDR,MAFLQANITR,NTHVYAFVEHGNDLGSSK,QGYVFNIEAGK,QGYVFNIEAGKK,TGQGSSYGAGVK,VSDIMFFDR,VSDIMFFDR | Oxidation [M5],WYHDEGYACAQVVNFGNLNTK | Carbamidomethyl [C9]"	"sp|Q9STE8|TC753_ARATH Protein TOC75-3, chloroplastic OS=Arabidopsis thaliana GN=TOC75-3 PE=1 SV=1"	sp|Q9STE8|TC753_ARATH	"1283.582649,1284.568164,1543.688935,2014.984302,876.445428,1137.523546,1833.905091,2167.11347,1163.611378,1973.92277533,1224.61928,1352.708064,1110.529196,1128.52653,1144.521268,2485.110477"	"GGAPTLASFQPGGSVTFEHR,LEYVHPYLDGVYNPR,GYNMGELGAAR"	TOC75	http://www.uniprot.org/uniprot/Q9STE8	22.493888
18411992	17919124	20017900	21565588	17457556	17536328	19725964	14382395	21581244	18454472	24175260	18767060	sp|Q9SYP2|PFPA1_ARATH	Q9SYP2	2	16	9	67118.402	"99.7,99.2,99.0,99.2,99.7,95.3,99.0,95.6,99.6,99.7,99.7,99.7,99.7,99.7,99.7,99.7"	"AVSLCVEDQDYMGR | Carbamidomethyl [C5],ELSPLQQLR,FLMEDLYR,LLAYLVETEMNK,LLAYLVETEMNK | Oxidation [M10],LQEYLDQVR,LTIFDIAK,NQGGYDLLGR,QICDAVQAR | Carbamidomethyl [C3],QLLLHPESDDSAQLSQIETEK,TIVKPGCSQDVLK | Carbamidomethyl [C7],TLEITDDILQTYK,TTEQVNAALK,VELGDGTTVAEAADSHTMAR,VNSQLISNACTDALSAEK | Carbamidomethyl [C10],VVGVPVTTNGDLK"	sp|Q9SYP2|PFPA1_ARATH Pyrophosphate--fructose 6-phosphate 1-phosphotransferase subunit alpha 1 OS=Arabidopsis thaliana GN=PFP-ALPHA1 PE=2 SV=1	"sp|Q9SYP2|PFPA1_ARATH,sp|Q9C9K3|PFPA2_ARATH"	"1641.713548,1082.60832,1085.521922,1422.742232,1438.737246,1162.598042,919.538136,1091.53551,1059.513412,2380.17393,1443.776005,1551.804734,1073.571518,2029.931358,1919.92659,1297.723092"	"ELSPLQQLR,VVGVPVTTNGDLK,NQGGYDLLGR"	PFP	http://www.uniprot.org/uniprot/Q9SYP2	30.456026
74149512	50223340	57853832	55464760	58504760	52516188	56969648	71043336	61215944	45047128	44989908	52606688	sp|Q9SYT0|ANXD1_ARATH	Q9SYT0	1	16	16	36203.192	"99.3,99.4,99.0,99.7,99.7,99.7,99.7,99.7,99.7,99.0,96.2,99.7,97.4,99.7,99.7,99.7"	"AQINATFNR,DALLANEATKR,ELSNDFER,HYNDEDVIR,LLVSLVTSYR,SLEEDVAHHTTGDFR,SLEEGDDDDK,TGTDEGALTR,TSTQLLHAR,VIGEEYQR,VSDSVPAPSDDAEQLR,WTSSNQVLMEVACTR | Carbamidomethyl [C13],WTSSNQVLMEVACTR | Carbamidomethyl [C13] Deamidated [N5] Oxidation [M9],YEGDEVNMTLAK,YEGDEVNMTLAK | Oxidation [M8],YQDDHGEEILK"	sp|Q9SYT0|ANXD1_ARATH Annexin D1 OS=Arabidopsis thaliana GN=ANN1 PE=1 SV=1	sp|Q9SYT0|ANXD1_ARATH	"1033.530458,1200.646232,1008.450886,1159.525562,1149.674786,1712.77517867,1121.434146,1019.488616,1025.5618125,992.49238,1684.775362,1780.822564,1797.820422,1368.623888,1384.617394,1345.614521"	"AQINATFNR,ELSNDFER,TGTDEGALTR"	ANN1	http://www.uniprot.org/uniprot/Q9SYT0	48.264984
100388408	98265208	98073720	132026408	117060440	116492576	103891280	91118304	106569888	109973656	103755864	132847560	sp|Q9XFS9|DXR_ARATH	Q9XFS9	2	16	6	51963.263	"99.7,99.7,99.7,99.7,98.9,99.0,99.7,99.7,99.7,99.7,99.7,99.7,99.7,99.7,99.1,99.7"	"AGGTMTGVLSAANEK,AGGTMTGVLSAANEK | Oxidation [M5],EALADLDYK,FKPALVAVR,HPNWNMGK,HPNWNMGK | Oxidation [M6],IILTASGGAFR,ITVDSATLFNK,KITVDSATLFNK,LEIIPGEQGVIEVAR,LPILYTMSWPDR | Oxidation [M7],NESLINELK,VQQQQQPPPAWPGR,VVALAAGSNVTLLADQVR,YPSMDLAYAAGR,YPSMDLAYAAGR | Oxidation [M4]"	"sp|Q9XFS9|DXR_ARATH 1-deoxy-D-xylulose 5-phosphate reductoisomerase, chloroplastic OS=Arabidopsis thaliana GN=DXR PE=2 SV=2"	"tr|F4K7T6|F4K7T6_ARATH,sp|Q9XFS9|DXR_ARATH"	"1405.68749,1421.681918,1036.507827,999.6235685,982.442696,998.437938,1104.629194,1207.643574,1335.738825,1621.9036205,1506.752094,1058.561106,1615.820136,1796.017482,1313.606856,1329.601612"	"VVALAAGSNVTLLADQVR,LEIIPGEQGVIEVAR,NESLINELK"	DXR	http://www.uniprot.org/uniprot/Q9XFS9	30.188679
5.29388e+06	5068605	5196195	5588164	5.16339e+06	6.01305e+06	5.82846e+06	3.99361e+06	5.45826e+06	4426690	5441751	5.38693e+06	tr|F4I894|F4I894_ARATH	F4I894	2	16	8	284775.3	"99.4,99.7,97.8,99.7,99.7,97.5,99.7,99.7,99.0,99.0,97.1,99.7,96.8,95.9,97.4,99.7"	"ALADPNTDVR,ASQIVGNMCSLVTEPK | Carbamidomethyl [C9],AVSTCLSPLVLSK | Carbamidomethyl [C5],EASDEEEYDLVR,EGALLAFECLCEK | Carbamidomethyl [C9 C11],LFEPYVIK,LSHEEFQTVILPAAVK,LTEVLTDTHPK,LVLPSLLK,QEEAPALFLR,QLATDPSNTK,SVAESADDLWAR,TDVSLSVR,VLEAFSLK,VLVDPIPEVR,VQSAGQLALQQVGSVIK"	tr|F4I894|F4I894_ARATH Protein ILITYHIA OS=Arabidopsis thaliana GN=ILA PE=1 SV=1	"tr|F4I893|F4I893_ARATH,tr|F4I894|F4I894_ARATH"	"1070.535506,1732.848372,1373.75836,1453.619698,1538.711508,1007.567546,1780.97175,1252.666227,881.595022,1172.618766,1073.533904,1318.614462,875.471576,905.521908,1135.660464,1724.977905"	"ALADPNTDVR,VLVDPIPEVR,AVSTCLSPLVLSK | Carbamidomethyl [C5]"	ILA	http://www.uniprot.org/uniprot/F4I894	6.97318
10066754	10504318	11456208	11842406	10624363	10993438	10457258	9065927	10188457	10257088	7.72204e+06	9733163	tr|F4J9A0|F4J9A0_ARATH	F4J9A0	1	16	16	94384.413	"99.7,99.7,99.7,99.7,99.7,98.2,99.7,99.7,99.7,99.7,99.7,98.9,99.7,99.6,99.7,99.7"	"AASPPGTPDGLVTNFEIK,DLPLQIHTGFGDK,ELLDLASIK,ELLDLASIKK,EPDVQEDSSSFVR,IIWVDTSGQQR,IKEPDVQEDSSSFVR,IQPNTWSGAFQCWGK | Carbamidomethyl [C12],ISALLIDDGLK,IVLLHAAYPFSK,LNIDTDSSSPQNIISPK,LSVHGMVSSVK,QGLLATFVPK,TSGLDSFTSK,VLHDLLGQK,VMFSTDGYASPETYYLGAK"	tr|F4J9A0|F4J9A0_ARATH Nodulin/glutamine synthase-like protein OS=Arabidopsis thaliana GN=At3g53180 PE=1 SV=1	tr|F4J9A0|F4J9A0_ARATH	"1812.92664,1439.740659,1000.58063,1128.676137,1493.66357,1301.671846,1734.8421525,1778.820342,1156.669816,1357.776129,1827.922448,1142.611899,1072.623108,1041.498102,1021.592895,2098.952918"	"ISALLIDDGLK,IIWVDTSGQQR,TSGLDSFTSK"	At3g53180	http://www.uniprot.org/uniprot/F4J9A0	21.244131
37529264	35326488	41775592	47043716	46909528	43331704	46817232	39637032	44972484	34602716	40665368	45803244	tr|F4K409|F4K409_ARATH	F4K409	2	16	0	74413.37	"99.7,99.1,99.7,99.7,99.7,99.7,99.7,99.7,99.7,99.0,99.7,99.6,99.4,99.7,99.7,99.7"	"DGALQMLATNIEYDEHK,EGYEFMVGPPK | Oxidation [M6],GQMFDMQGVGSEGTTFLR | Oxidation [M3 M6],GQMFDMQGVGSEGTTFLR | Oxidation [M3],GQMFDMQGVGSEGTTFLR | Oxidation [M6],GQMFVGSGVDVYK,GQMFVGSGVDVYK | Oxidation [M3],MSFSVNTSPFSGR,MSFSVNTSPFSGR | Oxidation [M1],NAILTASR,NIAIVAHVDHGK,TTLVDSMLR | Oxidation [M7],VCTSEDSCR | Carbamidomethyl [C2 C8],VEDGETADTFIVSGR,VHGKPLPTIK,VNIIDTPGHSDFGGEVER"	tr|F4K409|F4K409_ARATH Putative TypA-like translation elongation factor SVR3 OS=Arabidopsis thaliana GN=At5g13650 PE=4 SV=1	"tr|F4K410|F4K410_ARATH,tr|F4K409|F4K409_ARATH"	"1946.905863,1268.5745,1991.872404,1975.879226,1975.872918,1385.663846,1401.659332,1415.650436,1431.644636,844.47628,1272.693548,1050.53822,1112.418768,1594.750386,1088.67039,1940.922803"	"VEDGETADTFIVSGR,NAILTASR,VNIIDTPGHSDFGGEVER"	At5g13650	http://www.uniprot.org/uniprot/F4K409	22.633136
67888384	70888344	70266512	72163504	67098508	75008488	70768864	70783496	78005440	64515192	68101928	76692480	tr|O80576|O80576_ARATH	O80576	1	16	16	36035.833	"99.5,99.0,99.7,99.7,99.7,99.0,99.0,99.3,99.7,99.7,99.7,94.5,99.7,99.7,99.7,99.7"	"ADIVVDVLVK,AEIADSIK,DFIHDIGEK,GNIDVDTPFGAMK,GNIDVDTPFGAMK | Oxidation [M12],IPLTLIYDDIK,KPDVDIEK,LEGTIGFGKPTADVSAIHIPK,LVSGLIPDAGTLK,NGSGLINVPMTFRPK,NGSGLINVPMTFRPK | Deamidated [N1],NGSGLINVPMTFRPK | Deamidated [N1] Oxidation [M10],STYNDINPGMIIPYR,STYNDINPGMIIPYR | Oxidation [M10],VKDFIHDIGEK,VVHQEGDVEIVDR"	tr|O80576|O80576_ARATH At2g44060 OS=Arabidopsis thaliana GN=At2g44060 PE=2 SV=1	tr|O80576|O80576_ARATH	"1069.63817,845.4490445,1072.51878,1363.642916,1379.638662,1302.743832,942.502584,2150.172428,1282.74963233,1629.866442,1630.849737,1646.851617,1752.843795,1768.844088,1299.68227867,1493.7464645"	"LVSGLIPDAGTLK,AEIADSIK,GNIDVDTPFGAMK"	At2g44060	http://www.uniprot.org/uniprot/O80576	42.461538
70613848	61959656	69161784	62035716	52197936	75857680	63144036	68389072	64183524	75641464	65255280	58244616	tr|Q9SAJ4|Q9SAJ4_ARATH	Q9SAJ4	3	16	15	42131.254	"99.7,99.7,99.7,99.7,99.7,99.7,99.7,99.0,99.7,99.7,93.6,99.0,95.4,94.4,98.4,99.7"	"ELDYLVGAVANPK,FLKPSVAGFLMQK,FLKPSVAGFLMQK | Oxidation [M11],FYAEEEKNDPEFAK,GVSLLLPTDVVIADK,KPFAAIVGGSK,LAALADVYVNDAFGTAHR,QLAELSGK,TFSEALDTTK,VDLNVPLDDNSNITDDTR,VVLCSHLGRPK | Carbamidomethyl [C4],YLMGNGSR,YLMGNGSR | Deamidated [N5],YLMGNGSR | Deamidated [N5] Oxidation [M3],YLMGNGSR | Oxidation [M3],YSLKPLVPR"	tr|Q9SAJ4|Q9SAJ4_ARATH Phosphoglycerate kinase OS=Arabidopsis thaliana GN=T8K14.3 PE=1 SV=1	"tr|F4I3L1|F4I3L1_ARATH,tr|Q9SAJ4|Q9SAJ4_ARATH,sp|P50318|PGKH2_ARATH"	"1387.73459,1464.8164125,1480.810032,1715.7683595,1538.892504,1073.623516,1902.958398,844.46559,1111.539958,2014.944852,1264.706928,896.417082,897.400924,913.396676,912.410878,1071.6440505"	"ELDYLVGAVANPK,YSLKPLVPR,TFSEALDTTK"	T8K14	http://www.uniprot.org/uniprot/Q9SAJ4	36.907731
108924912	98222504	115163096	122338176	141505776	112764016	113678792	107896728	112229648	95206304	119787472	120712632	sp|O04603|RK5_ARATH	O04603	1	15	15	28343.469	"99.7,99.7,99.7,99.7,99.7,99.7,99.7,99.7,99.7,99.7,99.7,99.0,99.7,99.6,99.7"	"DFQGVSPSSFDGNGNYSIGVK,DFQGVSPSSFDGNGNYSIGVK | Deamidated [N13],DIALITGQKPIK,EDQPLGIAVTLR,EGGGGSTGAIVR,GDVMYSFLDR,GDVMYSFLDR | Oxidation [M4],GMDVCISTTAK | Carbamidomethyl [C5],IIPALKEEFK,IREDQPLGIAVTLR,IVVNCGIGDAAQNDK | Carbamidomethyl [C5],LINLALPR,LLALMGMPFR | Oxidation [M5 M7],LLALMGMPFR | Oxidation [M7],YVNIHQVPK"	"sp|O04603|RK5_ARATH 50S ribosomal protein L5, chloroplastic OS=Arabidopsis thaliana GN=RPL5 PE=2 SV=1"	sp|O04603|RK5_ARATH	"2173.9896,2174.976912,1295.781264,1310.71908633,1059.53071,1201.545214,1217.540704,1181.541276,1186.696356,1579.90443,1572.756258,908.581156,1179.61356,1163.619232,1096.602753"	"EGGGGSTGAIVR,DIALITGQKPIK,IVVNCGIGDAAQNDK | Carbamidomethyl [C5]"	RPL5	http://www.uniprot.org/uniprot/O04603	50.381679
20433244	20284864	19832304	18444772	15012392	17981632	26910048	22884576	23789092	17035224	18305840	17356540	sp|P11035|NIA2_ARATH	P11035	1	15	15	102843.083	"99.7,99.7,99.7,99.7,99.7,93.6,99.7,99.7,93.5,99.3,99.7,99.0,99.0,99.0,96.4"	"DEYTADSWIER,EELDGWAEQYPDR,EFAATLVCAGNR | Carbamidomethyl [C8],ESDNFYHFK,GPLGHVEYLGK,GYAYSGGGK,HPFNSEAPLNR,IIIPGFIGGR,LEPGLNGVVR,SNAELEPSVLDPR,SYKPPVPGR,TEEDILLR,TSISHDVR,VPVQLVEK,VWYVVESAK"	sp|P11035|NIA2_ARATH Nitrate reductase [NADH] 2 OS=Arabidopsis thaliana GN=NIA2 PE=1 SV=1	sp|P11035|NIA2_ARATH	"1383.593416,1606.68974,1307.627874,1185.5090865,1168.623465,858.386544,1280.625698,1041.634214,1052.59772,1425.70952,999.55002,987.523676,913.46028,910.548594,1079.566374"	"TEEDILLR,IIIPGFIGGR,SNAELEPSVLDPR"	NIA2	http://www.uniprot.org/uniprot/P11035	16.466739
16956208	15973731	15516409	18665504	17085752	18072800	18947472	14783250	18130796	20239168	17744928	17240312	sp|P28769|TCPA_ARATH	P28769	1	15	15	59228.667	"99.7,99.7,97.7,99.7,96.3,99.7,99.4,99.7,99.7,99.7,99.7,99.0,99.7,94.5,93.3"	"AGANVILTTK,ALHDALCIVK | Carbamidomethyl [C7],DATELVAK,GANDYMLDEMER,GIDDMALK,HYSSMGLDLVNGTIR,IACLDFNLQK | Carbamidomethyl [C3],MLEVEHPAAK,TQNVMACQAVSNIVK | Carbamidomethyl [C7],TQNVMACQAVSNIVK | Carbamidomethyl [C7] Oxidation [M5],TSSAVSLILR,VLAVNAAK,VLVELAELQDR,VPLINCAK | Carbamidomethyl [C6],YFVEAGAIAVR"	sp|P28769|TCPA_ARATH T-complex protein 1 subunit alpha OS=Arabidopsis thaliana GN=CCT1 PE=1 SV=1	sp|P28769|TCPA_ARATH	"986.575288,1138.616724,845.449594,1442.57899,861.42633,1661.821992,1220.62009,1123.56957,1661.822352,1677.818142,1045.613866,784.48028,1283.707208,913.505392,1194.640164"	"VPLINCAK | Carbamidomethyl [C6],VLVELAELQDR,AGANVILTTK"	CCT1	http://www.uniprot.org/uniprot/P28769	26.788991
181552640	125287216	159393552	151045824	149217088	140446240	132413992	171853072	122303168	141918304	116496640	129084896	sp|P32961|NRL1_ARATH	P32961	1	15	15	38151.741	"99.7,99.7,99.7,99.7,99.7,99.7,99.2,99.7,95.8,99.7,94.5,99.0,99.7,99.7,99.0"	"CIWGQGDGSTIPVYDTPIGK | Carbamidomethyl [C1],DMSTVQNATPFNGVAPSTTVR,DMSTVQNATPFNGVAPSTTVR | Deamidated [N12],DMSTVQNATPFNGVAPSTTVR | Deamidated [N12] Oxidation [M2],DMSTVQNATPFNGVAPSTTVR | Oxidation [M2],FGLAVGVHNEEGR,FGLAVGVHNEEGRDEFR,GIELYCAPTADGSK | Carbamidomethyl [C6],KLMPTSLER | Oxidation [M3],LGAAICWENR | Carbamidomethyl [C6],LMPTSLER,LMPTSLER | Oxidation [M2],VTIVQSSTVYNDTPATIDK,YHASAIHVPG…	sp|P32961|NRL1_ARATH Nitrilase 1 OS=Arabidopsis thaliana GN=NIT1 PE=1 SV=2	sp|P32961|NRL1_ARATH	"2163.031898,2192.053005,2193.038167,2209.03597533,2208.0491405,1383.689021,1930.927476,1480.685348,1089.585514,1188.570664,945.49546,961.489934,2051.03843767,1602.826835,879.47008"	"LMPTSLER,YIVEAASK,GIELYCAPTADGSK | Carbamidomethyl [C6]"	NIT1	http://www.uniprot.org/uniprot/P32961	38.439306
76865304	82168296	76298608	76842416	68818472	74669384	77244552	62727692	72472768	61509176	80840336	70483464	sp|P46248|AAT5_ARATH	P46248	3	15	0	49830.665	"99.6,93.5,99.7,99.7,99.2,96.6,99.7,99.7,99.4,99.0,99.7,99.7,99.7,99.7,99.7"	"AEMEMMAGR,AEMEMMAGR | Oxidation [M5],ATAELLFGAGHPVIK,EAPEGSFILLHGCAHNPTGIDPTPEQWVK | Carbamidomethyl [C13],GMEFFVAQSYSK,IADVIQEK,IGAINVVCSSADAATR | Carbamidomethyl [C8],ISLAGLSLAK,KAENLMLER | Oxidation [M6],NLGLYAER,QELYDSLVSK,QIGMFSFTGLNK | Oxidation [M4],TEELQPYVLNVVK,VATIQGLSGTGSLR,VVISSPTWGNHK"	"sp|P46248|AAT5_ARATH Aspartate aminotransferase, chloroplastic OS=Arabidopsis thaliana GN=ASP5 PE=1 SV=2"	"tr|B9DG21|B9DG21_ARATH,tr|F4JTH0|F4JTH0_ARATH,sp|P46248|AAT5_ARATH"	"1024.41437,1040.408982,1522.8501145,3199.545666,1392.638038,914.506932,1603.799619,971.601682,1118.574516,934.487422,1180.597,1357.669062,1530.8287965,1358.75134,1323.693753"	"IADVIQEK,ATAELLFGAGHPVIK,VATIQGLSGTGSLR"	ASP5	http://www.uniprot.org/uniprot/P46248	39.072848
1464761728	1583314048	1696801152	1541499008	1265064448	1520595328	1758687360	1465922688	1621932160	1587734656	1730398848	1600722944	sp|P83755|PSBA_ARATH	P83755	1	15	15	38936.062	"99.7,99.7,99.7,99.7,99.0,99.7,99.7,99.7,99.7,99.0,99.7,99.5,99.7,99.7,99.7"	"ANLGMEVMHER,ANLGMEVMHER | Oxidation [M5 M8],ANLGMEVMHER | Oxidation [M5],ANLGMEVMHER | Oxidation [M8],ESESLWGR,ETTENESANEGYR,ETTENESANEGYR | Deamidated [N5],FCNWITSTENR | Carbamidomethyl [C2],FGQEEETYNIVAAHGYFGR,FGQEEETYNIVAAHGYFGR | Deamidated [Q3],LIFQYASFNNSR,NAHNFPLDLAAVEAPSTNG,RESESLWGR,VINTWADIINR,VINTWADIINR | Deamidated [N3]"	sp|P83755|PSBA_ARATH Photosystem II protein D1 OS=Arabidopsis thaliana GN=psbA PE=1 SV=2	sp|P83755|PSBA_ARATH	"1285.59108133,1317.580868,1301.5858155,1301.5856285,962.445682,1498.61637533,1499.600558,1426.62857,2187.0082335,2188.0032555,1458.725336,1936.925556,1118.546147,1313.71010467,1314.690194"	"VINTWADIINR,ESESLWGR,ETTENESANEGYR"	psbA	http://www.uniprot.org/uniprot/P83755	29.745042
58507032	59630892	61741604	56897712	44247508	57101284	64697680	53148616	59272792	73600616	54754656	58402424	sp|P92947|MDAR5_ARATH	P92947	3	15	0	53301.168	"99.6,99.7,99.7,99.7,99.7,99.7,99.7,99.7,99.7,99.7,99.6,99.7,95.8,99.5,99.7"	"EAYAPYERPALTK,EVADADSLIASLGK,GASINNLEAGSDGR,GIEVIYEDPVAGADFEK,IATFWIESGR,IGGHLPGVHYIR,LASASSVEEALEIAQAALQS,LFTPSLAQK,LPGFHTCVGGGGER | Carbamidomethyl [C7],QTLTTDAGK,SIGGIQVDGLFR,TFVENGMADGR,TFVENGMADGR | Oxidation [M7],VFEYEGSPR,YGSLIIATGCTASR | Carbamidomethyl [C10]"	"sp|P92947|MDAR5_ARATH Monodehydroascorbate reductase 5, mitochondrial OS=Arabidopsis thaliana GN=MDAR5 PE=1 SV=3"	"tr|F4I576|F4I576_ARATH,sp|P92947|MDAR5_ARATH,tr|F4I577|F4I577_ARATH"	"1507.765922,1387.718976,1359.637322,1850.892963,1178.607978,1317.73092867,1987.011792,1003.57052,1442.671626,933.476316,1260.681586,1195.529672,1211.523598,1082.503244,1468.735062"	"GASINNLEAGSDGR,VFEYEGSPR,SIGGIQVDGLFR"	MDAR5	http://www.uniprot.org/uniprot/P92947	36.105477
25448732	18510588	29905620	27637940	21557172	32026112	18610604	16823744	20096256	18184508	21609024	25818648	sp|Q05431|APX1_ARATH	Q05431	5	15	2	27560.895	"99.7,99.7,98.1,99.7,99.7,99.7,99.7,99.0,99.7,99.7,99.0,98.6,99.7,99.4,99.7"	"ALLDDPVFRPLVEK,DIVALSGAHTLGR,EDKPQPPPEGR,EGLLQLVSDK,FDAEQAHGANSGIHIALR,LAWHSAGTFDCQSR | Carbamidomethyl [C11],LSELGFADA,NCAPIMVR | Carbamidomethyl [C2],NYPTVSEDYK,NYPTVSEDYKK,QMGLSDKDIVALSGAHTLGR,QMGLSDKDIVALSGAHTLGR | Oxidation [M2],TGGPFGTMR,TGGPFGTMR | Oxidation [M8],YAADEDAFFADYAEAHMK"	"sp|Q05431|APX1_ARATH L-ascorbate peroxidase 1, cytosolic OS=Arabidopsis thaliana GN=APX1 PE=1 SV=2"	"sp|Q05431|APX1_ARATH,tr|F4HU93|F4HU93_ARATH,tr|F4JFY5|F4JFY5_ARATH,tr|F4JFY4|F4JFY4_ARATH,sp|Q42592|APXS_ARATH"	"1610.903728,1308.7151375,1248.607716,1100.60777,1905.944025,1634.7245995,921.4449645,959.468188,1214.545186,1342.6400995,2068.07396,2084.06708,922.432748,938.428074,2063.855346"	"LSELGFADA,QMGLSDKDIVALSGAHTLGR | Oxidation [M2]"	APX1	http://www.uniprot.org/uniprot/Q05431	56.8
14292116	15960238	11419274	5359582	4.67834e+06	4985082	14041833	12224193	14251755	8147642	6.15256e+06	7.15304e+06	sp|Q06738|LTI78_ARATH	Q06738	1	15	15	77854.788	"99.7,99.7,99.7,99.7,97.3,99.7,99.7,99.6,99.7,99.7,99.7,99.7,99.7,98.5,99.7"	"AASEEGEAVEEEVK,DQETESAVTTK,DVPTGFDGEPDFLAK,EFDQDFDSVLGK,ETNVPASEEIIPPGTK,GRPGYGEASEEDKFPAR,LPISGGGSGVEEQR,LQIGGEEEKK,NEYSPESDGGLGAPLGGNFPVR,NSPMGFGSESGAELEK,NSPMGFGSESGAELEK | Oxidation [M4],SSGWFGGGATEEVKPK,TETGMDTNSPSR,TETGMDTNSPSR | Oxidation [M5],TETLDQFSPELSHPK"	sp|Q06738|LTI78_ARATH Low-temperature-induced 78 kDa protein OS=Arabidopsis thaliana GN=LTI78 PE=1 SV=2	sp|Q06738|LTI78_ARATH	"1475.663444,1207.554708,1606.750978,1398.629838,1680.857084,1864.871356,1384.694114,1129.59792,2232.047542,1638.718756,1654.714338,1635.7874395,1294.544312,1310.53476,1727.835585"	"LPISGGGSGVEEQR,SSGWFGGGATEEVKPK,TETLDQFSPELSHPK"	LTI78	http://www.uniprot.org/uniprot/Q06738	26.760563
65991016	83469432	76362840	71539696	65633468	76634096	76868512	71183760	78313512	97130976	78645760	84530608	sp|Q56ZI2|PATL2_ARATH	Q56ZI2	1	15	15	76007.052	"92.9,98.7,99.7,99.3,98.6,98.6,99.7,99.7,99.7,99.7,99.7,99.7,99.5,98.6,99.7"	"AFAADQEEETK,AQEEIQKPTASVPVVK,DSPFTVEDGVTEAVVK,EEILAAPAPIVAETK,EFTAPPPPPAPVK,EFTAPPPPPAPVKEEK,KEEILAAPAPIVAETK,QFEDNYPEFVAK,SAAPATVETK,VGLTDEPVITDSFK,VVITIDNQTFK,VVPVETTPAAPVTTETK,VVPVETTPAAPVTTETKEEEK,VVSEVAVPETEVTAVK,YVAPEVVPVK"	sp|Q56ZI2|PATL2_ARATH Patellin-2 OS=Arabidopsis thaliana GN=PATL2 PE=1 SV=2	sp|Q56ZI2|PATL2_ARATH	"1237.546144,1722.949046,1691.824096,1550.855358,1346.724016,1732.902657,1678.950134,1485.676782,973.507712,1519.776198,1276.70157,1738.93562025,2254.153005,1655.898184,1099.62823"	"DSPFTVEDGVTEAVVK,VVPVETTPAAPVTTETK,VVITIDNQTFK"	PATL2	http://www.uniprot.org/uniprot/Q56ZI2	24.743777
16053846	17170540	16765782	19790796	16521351	16457730	11226630	8.20157e+06	10920387	12628886	11190863	10389185	sp|Q7Y1W1|TIC56_ARATH	Q7Y1W1	1	15	15	61624.035	"98.1,95.7,95.8,99.7,99.0,99.7,99.7,94.0,99.7,99.7,99.6,99.7,99.5,97.8,99.7"	"AEEIADDMNK,AEEIADDMNK | Oxidation [M8],ASPVVQFMTR,DMAVLEANGGVWPGVR | Oxidation [M2],EESDDKFWDFMK,ENPSTEEIEAEQK,EPLGTYTTGPPYIR,IFYNLSVR,LGAAATAFLHK,MELEDNDTPYR,MELEDNDTPYR | Oxidation [M1],SPKPETAGTDEPGPYK,TAYGAGIIDR,TDEDEEEEEEEDDDSNSK,TVPGFDTIMDK"	"sp|Q7Y1W1|TIC56_ARATH Protein TIC 56, chloroplastic OS=Arabidopsis thaliana GN=TIC56 PE=1 SV=1"	sp|Q7Y1W1|TIC56_ARATH	"1134.486044,1150.470308,1134.58447,1685.817976,1575.657648,1502.673076,1563.792308,1010.554598,1098.618552,1381.582408,1397.577443,1672.7936625,1035.534846,2142.737844,1222.589564"	"TAYGAGIIDR,LGAAATAFLHK,MELEDNDTPYR"	TIC56	http://www.uniprot.org/uniprot/Q7Y1W1	30.360531
12899572	16820648	13905260	14724770	15418808	15107968	14049127	10633995	12535279	9920543	13925742	11240581	sp|Q8L785|SYGM2_ARATH	Q8L785	1	15	15	119771.809	"99.7,99.7,99.7,99.0,99.4,97.7,99.7,99.6,99.5,99.0,99.4,97.9,98.3,99.7,99.7"	"AFDDEGNPTK,AVSVPTFQQAIQR,DQLQGILFHEK,FFYEVDTR,GNNPCLAAR | Carbamidomethyl [C5],HFDYFDEEAR,LEQLLVDNGVSPEVVR,LVVLVDAMSSK,LVVPQNLLNEVANLVEAPVPLIGK,NPDDDVTR,QCAQLWLATR | Carbamidomethyl [C2],TDAGMVLAIGDR | Oxidation [M5],TLWSTYTSIK,TSHAFNILDAR,VLGPEPWNVAYVEPSIRPDDSR"	"sp|Q8L785|SYGM2_ARATH Glycine--tRNA ligase, chloroplastic/mitochondrial 2 OS=Arabidopsis thaliana GN=EDD1 PE=1 SV=1"	sp|Q8L785|SYGM2_ARATH	"1092.471922,1443.7826185,1326.691707,1075.497466,971.460528,1327.546072,1765.957121,1160.646804,2538.480489,930.402816,1245.628634,1233.602062,1198.623306,1243.630191,2495.242539"	"VLGPEPWNVAYVEPSIRPDDSR,FFYEVDTR,TLWSTYTSIK"	EDD1	http://www.uniprot.org/uniprot/Q8L785	17.338332
5.65586e+06	6.92573e+06	6.74306e+06	6878271	6490278	5.67146e+06	7.14846e+06	4.75607e+06	6.95402e+06	4.50627e+06	6554333	6631852	sp|Q8LPK4|AP2A2_ARATH	Q8LPK4	2	15	4	112297.542	"99.7,99.0,98.4,99.7,98.5,98.6,99.7,96.5,95.4,99.7,99.6,99.7,99.7,99.7,97.5"	"AENVEDTADQSAIK,ALFEVLQR,AVEYFELSK,DSGVLYEDPHIQIGIK,EQLITIPMGSR,GLSVFISDVR,HQSQIITSLKDPDISIR,IAIHETMVK,IETDPADR,KAENVEDTADQSAIK,QPGCSASELFSILHEK | Carbamidomethyl [C4],VPILSGSTDPESVAR,VSAYILGEYGHLLAR,VVQFVTNNEDLQPYAASK,YLGLENMTR"	sp|Q8LPK4|AP2A2_ARATH AP-2 complex subunit alpha-2 OS=Arabidopsis thaliana GN=ALPHAC-AD PE=1 SV=1	"sp|Q8LPL6|AP2A1_ARATH,sp|Q8LPK4|AP2A2_ARATH"	"1489.689812,974.554716,1084.54395,1782.915147,1243.659008,1091.598374,1950.051957,1040.56869,915.429194,1617.7839625,1801.866774,1526.795988,1660.893516,2022.0059735,1095.53872"	"AVEYFELSK,YLGLENMTR,IETDPADR"	ALPHAC	http://www.uniprot.org/uniprot/Q8LPK4	17.374136
201520288	250728800	216812672	216203232	216144576	225132032	247762128	186095600	229584288	191724752	184046496	224823744	sp|Q8W493|FNRL2_ARATH	Q8W493	1	15	15	41167.661	"99.7,99.0,99.7,99.7,99.7,99.7,99.7,99.7,99.7,99.7,99.7,99.7,99.7,99.7,99.7"	"AEQWNVEVY,AKAPENFR,AQITTETDTPTPAK,EGQSVGVIADGIDK,GVCSNFLCDLAPGSDVK | Carbamidomethyl [C3 C8],ITADDAPGETWHMVFSHQGEIPYR,ITADDAPGETWHMVFSHQGEIPYR | Oxidation [M13],KAEQWNVEVY,KNEEGVIVNR,LVYTNDQGETVK,LVYTNDQGETVK | Deamidated [N5],LYSIASSALGDLGNSETVSLCVK | Carbamidomethyl [C21],MAQYAAELWELLK | Oxidation [M1],NEEGVIVNR,RLVYTNDQGETVK"	"sp|Q8W493|FNRL2_ARATH Ferredoxin--NADP reductase, leaf isozyme 2, chloroplastic OS=Arabidopsis thaliana GN=LFNR2 PE=1 SV=1"	sp|Q8W493|FNRL2_ARATH	"1136.513276,931.486428,1472.735022,1386.699239,1837.8323695,2756.2643515,2772.26014167,1264.608804,1156.6199395,1365.677186,1366.660198,2383.19799067,1580.79206,1028.525488,1521.778878"	"EGQSVGVIADGIDK,LVYTNDQGETVK,KNEEGVIVNR"	LFNR2	http://www.uniprot.org/uniprot/Q8W493	39.566396
37371328	69859064	27795680	21093240	19982120	21959292	50292104	23752676	23870448	22419476	96092256	21687356	sp|Q94A28|ACO3M_ARATH	Q94A28	1	15	15	108479.71	"99.7,99.7,99.7,99.7,99.0,99.7,99.7,95.2,99.3,99.6,99.0,99.7,99.7,99.7,99.0"	"ADWHACLDNPVGFK | Carbamidomethyl [C6],AGEDAETLGLTGHER,ANNMFVDYNEPQQER | Oxidation [M4],EGVTATDLVLTVTQILR,FSYNGQPAEIK,GEVGPNTVHIPTGEK,GVISEDFNSYGSR,ILDWENTSTK,LSVFDAASK,NCDNYQVTK | Carbamidomethyl [C2],NMTANPPGPR | Oxidation [M2],QVEIAFKPAR,TAEQDTIILAGAEYGSGSSR,VSDIRPGQDVTVTTDSGK,YTVHLPTK"	"sp|Q94A28|ACO3M_ARATH Aconitate hydratase 3, mitochondrial OS=Arabidopsis thaliana GN=ACO3 PE=2 SV=3"	sp|Q94A28|ACO3M_ARATH	"1628.740797,1554.7266465,1869.79551,1828.033898,1252.612262,1533.779211,1429.645984,1205.603152,936.49204,1140.486328,1069.496948,1157.65581,2024.964926,1873.937364,957.528306"	"ILDWENTSTK,LSVFDAASK,GVISEDFNSYGSR"	ACO3	http://www.uniprot.org/uniprot/Q94A28	19.497487
25662572	20715116	22687860	22097408	24041216	21047092	21216076	21221932	22861552	21029852	21251620	18490308	sp|Q94AQ8|PNSB2_ARATH	Q94AQ8	1	15	15	38005.121	"93.5,99.0,99.7,99.7,99.7,99.7,96.8,99.6,99.7,99.7,98.5,97.8,98.7,98.4,99.6"	"AVYNTPPSK,FETIDQGR,FSESNNIPMVELK,FSESNNIPMVELK | Oxidation [M9],GGSSVISGCDWSVK | Carbamidomethyl [C9],GGVGVVIVNGEEPK,GGVGVVIVNGEEPK | Deamidated [N9],IGFEEMYVGSPGSMWDK | Oxidation [M14],IGFEEMYVGSPGSMWDK | Oxidation [M6 M14],IGFEEMYVGSPGSMWDK | Oxidation [M6],IYGAPPAER,KPVTLKPGIMSYLR,LSLSDAHVLSYKPK,SGAGIQGLK,SSISAPQTQTINTEK"	"sp|Q94AQ8|PNSB2_ARATH Photosynthetic NDH subunit of subcomplex B 2, chloroplastic OS=Arabidopsis thaliana GN=PNSB2 PE=2 SV=1"	sp|Q94AQ8|PNSB2_ARATH	"975.503324,964.461576,1506.735044,1522.73641,1437.655556,1352.729754,1353.711826,1947.838904,1963.834782,1947.836006,972.502674,1601.932126,1556.856755,829.466292,1603.804602"	"GGSSVISGCDWSVK | Carbamidomethyl [C9],FETIDQGR,AVYNTPPSK"	PNSB2	http://www.uniprot.org/uniprot/Q94AQ8	39.08046
31063416	34215268	25978620	34264804	28635424	40880024	33878308	34813960	35140800	51836788	34865632	35860780	sp|Q9C8G5|CSCLD_ARATH	Q9C8G5	1	15	15	81934.075	"99.7,99.3,98.5,97.3,99.0,99.7,99.7,99.7,99.7,99.7,99.6,97.8,97.7,99.7,99.7"	"AEAILAATNNRPTNK,AQALMSADVKPEQFAILVR | Oxidation [M5],DMPAPPDGQTQK | Oxidation [M2],EAWYPGDLSYATR,EFIDSYFR,FYGGFEHTALEVACR | Carbamidomethyl [C14],GTFSQLDNLSMANITK,GTFSQLDNLSMANITK | Oxidation [M11],QLLWQNLNIK,QSPDLEEIFR,SGNAPIYYPNR,SLVATENSK,TGFCGLVGK | Carbamidomethyl [C4],VAAASAAQSLHCQMVDK | Carbamidomethyl [C12],VYVPSYESYGR"	sp|Q9C8G5|CSCLD_ARATH CSC1-like protein ERD4 OS=Arabidopsis thaliana GN=ERD4 PE=2 SV=1	sp|Q9C8G5|CSCLD_ARATH	"1582.8442735,2102.117865,1299.575132,1527.698578,1075.497696,1755.803022,1738.856032,1754.8499,1268.723732,1232.60234,1250.604324,947.491976,937.469744,1785.844905,1318.619196"	"AEAILAATNNRPTNK,SGNAPIYYPNR,QSPDLEEIFR"	ERD4	http://www.uniprot.org/uniprot/Q9C8G5	24.171271
9506855	9813826	9589054	9992372	7502038	8770033	9439191	7024634	8530512	8.33995e+06	8403104	9042093	sp|Q9FIZ7|OPLA_ARATH	Q9FIZ7	1	15	15	137529.087	"99.7,99.0,99.7,99.4,96.4,99.7,99.7,99.7,99.7,99.7,99.7,99.6,99.7,99.7,99.1"	"AAVVGGNVLTSQR,GANYLITK,GIGVTSILKPR,IEVEPATSSVK,ILEEYTGK,IQDNLSDLQAQIAANQR,KPVVVSILSER,LLQFPSSDETTTK,LLSVDPSNYDDAPVEGIR,MGTTVATNALLER,VNVLFMQSDGGLAPESR,VNVLFMQSDGGLAPESR | Oxidation [M6],VVKPFDGEGLKPLLK,VVLALEDDDDDEGSLIK,YVQLNAEEAVR"	sp|Q9FIZ7|OPLA_ARATH 5-oxoprolinase OS=Arabidopsis thaliana GN=OXP1 PE=2 SV=1	sp|Q9FIZ7|OPLA_ARATH	"1270.699726,878.486452,1139.702892,1158.612908,951.491032,1896.962977,1225.740111,1465.72989,1958.958779,1375.712506,1818.893144,1834.88863,1638.970948,1844.887356,1290.65485133"	"AAVVGGNVLTSQR,MGTTVATNALLER,IEVEPATSSVK"	OXP1	http://www.uniprot.org/uniprot/Q9FIZ7	14.454976
18419056	26329176	23980340	23516344	24076808	24907072	21830852	14499615	22566436	20078984	22573532	26455720	sp|Q9FKK7|XYLA_ARATH	Q9FKK7	1	15	15	53719.27	"99.0,99.7,99.7,97.3,99.7,99.7,99.7,99.7,97.3,99.7,99.5,94.6,99.0,99.4,96.3"	"ADFEYLEK,DIAPDGTTLEESNK,EGYQTLLNTDMGR,FFEAAVAYK,GTGGDPFGAATK,GTLLIEPKPQEPTK,HQYDWDAATAANFLR,ILEEGSLSELVR,KYGLIDEFK,NLDEVIELAK,WYNAEEEILGK,YATWDSELGK,YGLIDEFK,YWPWEDGTNSVSMAK,YWPWEDGTNSVSMAK | Oxidation [M13]"	sp|Q9FKK7|XYLA_ARATH Xylose isomerase OS=Arabidopsis thaliana GN=XYLA PE=2 SV=2	sp|Q9FKK7|XYLA_ARATH	"1013.47074,1488.694494,1496.692154,1044.527886,1077.508704,1549.871967,1777.8153465,1343.728878,1111.591659,1142.617602,1350.644564,1168.528888,983.49679,1769.770332,1785.766868"	"NLDEVIELAK,ADFEYLEK,ILEEGSLSELVR"	XYLA	http://www.uniprot.org/uniprot/Q9FKK7	31.865828
248994544	220498368	225181184	258526992	208156096	264376544	223303968	231867648	230402160	307358528	210967696	234515200	sp|Q9FN48|CAS_ARATH	Q9FN48	1	15	15	41284.915	"99.7,99.7,99.7,99.7,99.7,98.0,99.7,99.7,99.6,99.0,99.0,99.7,99.7,99.7,99.7"	"AQEAMQSSGFDSEPVFNAAK,AQEAMQSSGFDSEPVFNAAK | Oxidation [M5],DQIVSSLTEVEK,GDLTPAQTLDLLCTK | Carbamidomethyl [C13],GSNIIILDSYTDSAK,KAQEAMQSSGFDSEPVFNAAK | Deamidated [Q7],KAQEAMQSSGFDSEPVFNAAK | Oxidation [M6],LASPAFSEASK,NCYIVTDGFSGGR | Carbamidomethyl [C2],NYLMVDIR,NYLMVDIR | Oxidation [M4],RVEAEIAALK,TVTDVAQQTSK,VFQVVGDALKPALDTALPIAK,VISIPLEELPNK"	"sp|Q9FN48|CAS_ARATH Calcium sensing receptor, chloroplastic OS=Arabidopsis thaliana GN=CAS PE=1 SV=1"	sp|Q9FN48|CAS_ARATH	"2112.942539,2128.936074,1346.693208,1644.8376695,1595.803968,2242.03773,2257.032162,1106.560466,1444.640223,1022.522182,1038.517298,1098.639606,1176.598156,2165.247105,1350.775961"	"VISIPLEELPNK,LASPAFSEASK,TVTDVAQQTSK"	CAS	http://www.uniprot.org/uniprot/Q9FN48	38.501292
30706552	34442528	34907532	31410864	28677868	29190796	31673600	23394464	31767636	24187076	31752416	32284964	sp|Q9FWA3|6GPD3_ARATH	Q9FWA3	3	15	13	53576.539	"99.7,99.1,99.7,99.7,99.7,99.7,99.7,99.4,99.7,99.7,99.7,99.7,99.0,99.0,99.7"	"AGGFGDILTDQK,AGSPVDQTIK,DSGPCVTYIGK | Carbamidomethyl [C5],DYFGAHTYER,EGNLPLYGFHDPESFVK,FLSGLKDER,GDCIVDGGNEWYENTER | Carbamidomethyl [C3],GFPISVYNR,ICSYAQGMNLIR | Carbamidomethyl [C2],ICSYAQGMNLIR | Carbamidomethyl [C2] Oxidation [M8],LPANLVQAQR,LSNEELHSVFSDWNK,NGPSMMPGGSYEAYK,NIEDIVLK,TDVEGSFHTEWFK"	"sp|Q9FWA3|6GPD3_ARATH 6-phosphogluconate dehydrogenase, decarboxylating 3 OS=Arabidopsis thaliana GN=At3g02360 PE=2 SV=1"	"sp|Q9FWA3|6GPD3_ARATH,sp|Q9FFR3|6PGD2_ARATH,sp|Q9SH69|6PGD1_ARATH"	"1220.60419,1014.532972,1195.554298,1257.541122,1947.932862,1063.565913,2012.81786,1051.545494,1424.687615,1440.686904,1108.63525,1803.8366585,1587.66966,942.538774,1581.710646"	"ICSYAQGMNLIR | Carbamidomethyl [C2],NIEDIVLK,AGGFGDILTDQK"	At3g02360	http://www.uniprot.org/uniprot/Q9FWA3	34.567901
46675360	61555968	42437816	45121192	36573792	39407860	48962596	35601208	43981628	47364132	42619064	36046532	sp|Q9LV33|BGL44_ARATH	Q9LV33	1	15	15	58982.756	"99.0,99.7,94.8,99.7,99.7,94.9,98.3,99.0,94.2,97.4,99.7,99.7,98.9,99.7,92.3"	"ADNLAAQR,DFADYAEFCYK | Carbamidomethyl [C9],DYLTNLKK,FGIVYVDYK,GFVFGTATSAYQVEGETHQDGR,GSIDFVGINQYTTYYMSEPHPTTKPK | Oxidation [M16],LHTGGLSR,LIDYMVQK,NWMTFNEPR,NWMTFNEPR | Oxidation [M3],VVAALGYDNGIFAPGR,VVAALGYDNGIFAPGR | Deamidated [N9],YKEDVDLMK,YKEDVDLMK | Oxidation [M8],YYKDYLTNLK"	sp|Q9LV33|BGL44_ARATH Beta-glucosidase 44 OS=Arabidopsis thaliana GN=BGLU44 PE=2 SV=1	sp|Q9LV33|BGL44_ARATH	"857.434954,1427.56973,993.549051,1102.56957,2356.075228,2989.416564,839.46051,1008.531184,1193.527858,1209.522626,1618.8452495,1619.831292,1139.552738,1155.548248,1319.676546"	"VVAALGYDNGIFAPGR,NWMTFNEPR,LIDYMVQK"	BGLU44	http://www.uniprot.org/uniprot/Q9LV33	26.757812
7470082	8396405	7.84393e+06	8.11874e+06	6.84636e+06	8610061	9105995	7278490	8.36332e+06	8961365	8.26911e+06	9649434	sp|Q9LX99|KCA1_ARATH	Q9LX99	2	15	11	141033.975	"99.7,99.1,99.0,99.7,99.7,93.8,97.8,99.4,99.7,99.7,99.7,99.7,99.7,97.5,98.7"	"AVEGTTDSSSVTK,DIAGTLAAEEAEDAGQVSK,DSVFSFIR,EHEILAEIR,EIATAHQLVETIPEQEDTNILEQSHDR,ISPLINEK,KLDQFVLETEAR,LFNDLLTAK,LQMQQQDSAIQNLQAK,NQIAQFLQLDQEQK,QEATDLQEYSNAK,SMAVSTQVLSPSLR,TGDALQSQDIFSPIPK,WNWEVSGFEPR,YLGVLAEK"	sp|Q9LX99|KCA1_ARATH Kinesin-like protein KCA1 OS=Arabidopsis thaliana GN=KCA1 PE=1 SV=1	"sp|Q9FKP4|KCA2_ARATH,sp|Q9LX99|KCA1_ARATH"	"1280.607574,1873.87398,969.492152,1108.587924,3115.500132,912.527794,1447.767661,1033.580348,1842.925696,1701.867682,1495.67811,1474.783172,1715.871746,1405.64048,891.506002"	"LFNDLLTAK,TGDALQSQDIFSPIPK,NQIAQFLQLDQEQK"	KCA1	http://www.uniprot.org/uniprot/Q9LX99	15.475255
35507520	40916500	44871776	45102640	31273308	39518528	37410012	30320520	43927472	32391088	42461520	42111456	sp|Q9MAH0|CAPP1_ARATH	Q9MAH0	1	15	15	110284.627	"99.7,95.7,99.7,99.7,98.8,99.7,99.4,99.7,99.7,99.7,99.7,99.7,95.3,99.7,99.0"	"ALLDEMAVVATEEYR | Oxidation [M6],DCLAQLYAK | Carbamidomethyl [C2],ETVQELYEHSAEYEGK,GDFVDESSATTESDLEETFK,GDPGIAALYDK,KGDFVDESSATTESDLEETFKK,LADLEAAPAAVAR,LILQTAGHK,LVEYDALLLDR,MASIDVHLR,MASIDVHLR | Oxidation [M1],RPLFGSDLPK,SIPTTEPYR,SPEEIFDALK,SVVFQEPR"	sp|Q9MAH0|CAPP1_ARATH Phosphoenolpyruvate carboxylase 1 OS=Arabidopsis thaliana GN=PPC1 PE=1 SV=1	sp|Q9MAH0|CAPP1_ARATH	"1724.825754,1080.526792,1910.852451,2205.943804,1118.56047,2462.133357,1266.693448,979.581306,1318.714154,1040.543724,1056.538668,1128.6288795,1062.534288,1147.57571,960.502544"	"LADLEAAPAAVAR,LVEYDALLLDR,SPEEIFDALK"	PPC1	http://www.uniprot.org/uniprot/Q9MAH0	15.718718
17688708	15697835	19779028	21118968	16399255	22354268	19137416	13567775	19989784	17250088	18404032	20878684	sp|Q9SF85|ADK1_ARATH	Q9SF85	2	15	5	37835.725	"99.7,99.7,99.7,99.0,99.7,99.0,99.7,99.7,99.7,99.4,99.7,99.7,99.7,99.7,99.0"	"AGCYASNVVIQR | Carbamidomethyl [C3],CLPYMDYIFGNETEAR | Carbamidomethyl [C1] Oxidation [M5],DATAAGVYVHYYEDEATPTGTCGVCVLGGER | Carbamidomethyl [C22 C25],DKYGEAMK,FNVEYIAGGATQNSIK,HLPMYDEMSQK | Oxidation [M4],KPENWALVEK,KYPVIPLPK,LNNAILAEDK,SGCTYPEKPDFN | Carbamidomethyl [C3],SLIANLSAANCYK | Carbamidomethyl [C11],TTVITQGADPVVVAEDGK,VAQWMLQVPGATSYMGSIGK | Oxidation [M5 M15],VHGWETDDVEQIAIK,YPVIPLPK"	sp|Q9SF85|ADK1_ARATH Adenosine kinase 1 OS=Arabidopsis thaliana GN=ADK1 PE=1 SV=1	"sp|Q9SF85|ADK1_ARATH,sp|Q9LZG0|ADK2_ARATH"	"1336.655634,1993.857054,3317.46801,940.4319175,1710.85684067,1393.599828,1212.64962,1053.658875,1099.587,1413.586438,1423.7124475,1798.93094567,2155.0460995,1738.8517625,925.563563"	"VHGWETDDVEQIAIK,VAQWMLQVPGATSYMGSIGK | Oxidation [M5 M15],CLPYMDYIFGNETEAR | Carbamidomethyl [C1] Oxidation [M5]"	ADK1	http://www.uniprot.org/uniprot/Q9SF85	58.430233
16311924	18435628	16432589	17068756	14324164	15658278	16008933	12359590	17265616	14714076	16576136	15790327	sp|Q9SIV2|PSD2A_ARATH	Q9SIV2	2	15	11	98143.355	"99.5,99.7,94.9,99.7,99.7,99.7,99.3,99.7,99.7,99.6,99.7,99.7,99.7,99.7,99.7"	"AFHETMADSDLK,ASTSSMTSVPKPLK,DEDLSEEDLELK,IAQGLVHMGK,MLQYGEQNIR,MLQYGEQNIR | Oxidation [M1],NLAGEIAQEYTK,QNLELYVER,SEAELGDALTR,TCNYLTSAAR | Carbamidomethyl [C2],TITGFQTHSTPVLLAAGER,VGQAVDVVGQAGRPK,VQDLLAQCGEHLEK | Carbamidomethyl [C8],VQDPNPELQK,YCDMTLLSCAYAGTGNVLK | Carbamidomethyl [C2 C9] Oxidation [M4]"	sp|Q9SIV2|PSD2A_ARATH 26S proteasome non-ATPase regulatory subunit 2 homolog A OS=Arabidopsis thaliana GN=RPN1A PE=1 SV=2	"sp|Q6XJG8|PSD2B_ARATH,sp|Q9SIV2|PSD2A_ARATH"	"1363.607721,1432.7591285,1433.639174,1052.579613,1250.608368,1266.602216,1335.663892,1162.597838,1160.567314,1155.534022,1998.0562875,1479.814961,1638.795556,1166.59282,2151.96904"	"NLAGEIAQEYTK,TCNYLTSAAR | Carbamidomethyl [C2],VQDLLAQCGEHLEK | Carbamidomethyl [C8]"	RPN1A	http://www.uniprot.org/uniprot/Q9SIV2	19.86532
50411020	44633480	46875748	46922244	42407216	43360052	46200552	35308440	42378768	39869872	40625264	41018716	sp|Q9SPK5|FTHS_ARATH	Q9SPK5	1	15	15	67800.992	"99.7,97.5,99.7,99.7,99.7,99.6,99.7,99.7,99.7,99.0,96.8,99.7,99.7,99.7,99.7"	"ACQNITQPLR | Carbamidomethyl [C2],DKIEAIAK,DLNINPLHYDLYGK,GAPSGFVLPIR,IFHETSQSDK,ITIGQGPEEK,KITIGQGPEEK,LDIDPASITWR,QIEMYTQQGFSNLPICMSK | Carbamidomethyl [C16] Oxidation [M17],SFSDIMFR,SFSDIMFR | Oxidation [M6],SYGASGVEYSDQAEK,TQYSFSHDASK,TSPEELTPEEIKK,YSGLTPQCAIVVATVR | Carbamidomethyl [C8]"	sp|Q9SPK5|FTHS_ARATH Formate--tetrahydrofolate ligase OS=Arabidopsis thaliana GN=THFS PE=2 SV=1	sp|Q9SPK5|FTHS_ARATH	"1199.607754,886.512506,1673.8400115,1112.634416,1190.555382,1070.56106,1198.655038,1285.666172,2290.043486,1001.46388,1017.459364,1589.684617,1269.5624815,1499.7718665,1733.913941"	"SYGASGVEYSDQAEK,LDIDPASITWR,ITIGQGPEEK"	THFS	http://www.uniprot.org/uniprot/Q9SPK5	24.763407
127489864	94581640	117616808	128821312	125068744	116321256	107152448	96976776	115324080	102086936	120870520	127342720	sp|Q9SW18|CHLM_ARATH	Q9SW18	1	15	15	33795.364	"99.7,99.7,99.5,99.7,99.7,99.7,99.7,99.6,99.7,99.7,99.7,99.0,99.7,99.7,99.0"	"ADGMIAHLASLAEK,ADGMIAHLASLAEK | Oxidation [M4],AQLPSENLPK,AYLHSEADVER,EYFNSTGFER,FEVNDLESLTGK,GLTTTQFYFSR,IGELFPGPSK,IYGETDEVNR,LQAEEVGGGDK,LQAEEVGGGDKEVVR,TFYYDILK,TVENTMLMLTEDR | Oxidation [M6 M8],TVENTMLMLTEDR | Oxidation [M6],VILSFAPK"	"sp|Q9SW18|CHLM_ARATH Magnesium protoporphyrin IX methyltransferase, chloroplastic OS=Arabidopsis thaliana GN=CHLM PE=1 SV=1"	sp|Q9SW18|CHLM_ARATH	"1425.728676,1441.722546,1095.59188,1288.6043,1248.541036,1350.666518,1319.650226,1043.565212,1194.551656,1101.52995,1584.809637,1061.5434335,1583.717062,1567.722334,873.532358"	"IGELFPGPSK,VILSFAPK,AQLPSENLPK"	CHLM	http://www.uniprot.org/uniprot/Q9SW18	42.307692
14820477	14485095	14215303	12731069	9914041	11869703	15532025	11191423	14813395	12189120	13076653	13544174	sp|Q9ZTZ7|KEA1_ARATH	Q9ZTZ7	3	15	12	128031.894	"99.7,99.1,99.7,98.8,99.7,99.7,99.7,99.0,99.7,99.7,99.1,99.7,99.7,99.7,99.7"	"ACAAVVALDAPGANYR | Carbamidomethyl [C2],AEEDVTNIMK | Oxidation [M9],AGATAVVPETLEPSLQLAAAVLAQAK,AHDVVHGLNLEK,EAVQTATMALSLAEAR,EAVQTATMALSLAEAR | Oxidation [M8],IGESSESSDETEATDLK,LLLRPIYK,LNEFAETIQISSLK,LNSTMFEEK,LNSTMFEEK | Oxidation [M5],SLDLPVYFGDAGSK,VENDTDSLEELK,VNDAEIALQR,VVEADSEKPK"	"sp|Q9ZTZ7|KEA1_ARATH K(+) efflux antiporter 1, chloroplastic OS=Arabidopsis thaliana GN=KEA1 PE=1 SV=2"	"tr|F4JHE9|F4JHE9_ARATH,sp|Q9ZTZ7|KEA1_ARATH,sp|O65272|KEA2_ARATH"	"1617.793018,1164.532528,2518.400679,1330.698389,1660.847292,1676.844044,1796.780842,1014.659439,1591.846694,1097.506316,1113.501108,1467.725,1390.64613,1127.592746,1100.569335"	"VENDTDSLEELK,LNSTMFEEK,ACAAVVALDAPGANYR | Carbamidomethyl [C2]"	KEA1	http://www.uniprot.org/uniprot/Q9ZTZ7	14.58508
15347885	23566628	20796016	16630322	16162374	12617056	26871348	10780818	24390184	11508336	29343720	13145040	tr|F4JLY4|F4JLY4_ARATH	F4JLY4	2	15	3	63116.201	"99.7,99.0,99.7,96.6,99.7,99.0,99.7,99.7,99.7,99.7,99.7,99.7,99.6,99.7,93.8"	"DNIVEESHLPK,FDFQGLVK,FLENSLDFNGGDFK,ICAAINMAER | Carbamidomethyl [C2],IRLELDQVVGK,KLDLLFDR,LELDQVVGK,LHPTLPLLVPHR,MFTTPTLEASYSTR,MFTTPTLEASYSTR | Oxidation [M1],NSETSVVAGYTVPK,NWDEPNEFKPER,SPLVAIPVPR,THDITFANHDLPEVGK,YLPFGSGR"	"tr|F4JLY4|F4JLY4_ARATH Cytochrome P450, family 706, subfamily A, polypeptide 1 OS=Arabidopsis thaliana GN=CYP706A1 PE=3 SV=1"	"tr|F4JLY4|F4JLY4_ARATH,tr|O49652|O49652_ARATH"	"1279.64112,952.501706,1601.736158,1147.54691,1268.744655,1018.581219,999.55946,1391.840566,1603.75451,1619.749136,1450.731804,1559.700087,1047.644139,1792.8749125,895.454814"	"MFTTPTLEASYSTR,ICAAINMAER | Carbamidomethyl [C2],MFTTPTLEASYSTR | Oxidation [M1]"	CYP706A1	http://www.uniprot.org/uniprot/F4JLY4	26.570916
11866335	14749093	12384220	14946229	12696039	13730647	10048436	9513520	11383310	13411129	14162102	12268926	tr|Q84W56|Q84W56_ARATH	Q84W56	1	15	15	100552.69	"99.4,99.4,95.7,99.0,93.3,99.7,98.9,99.7,99.2,96.3,99.7,99.7,99.7,96.9,93.7"	"APIDPSSLIK,CADGNILHTGDWK | Carbamidomethyl [C1],DDDELADASDSETK,EALEELSK,GELEEVLK,IDEAPLDGK,IMPDTGFIR,LSGDPSVGSGVAALR,MEQFYEGTDGPPLR,MEQFYEGTDGPPLR | Oxidation [M1],RPEVIAIATENPMAVR,SFINPSSSPSPSETENMNK,VEDIEAYAPK,VIPGNESR,VVADALVR"	tr|Q84W56|Q84W56_ARATH Putative uncharacterized protein At5g63420 OS=Arabidopsis thaliana GN=emb2746 PE=1 SV=1	tr|Q84W56|Q84W56_ARATH	"1039.591352,1485.666909,1509.594812,917.469878,915.491514,956.481072,1048.53822,1384.732396,1638.728834,1654.728452,1765.950522,2051.9119965,1133.561134,870.455786,841.50231"	"LSGDPSVGSGVAALR,APIDPSSLIK,VVADALVR"	emb2746	http://www.uniprot.org/uniprot/Q84W56	17.672887
15830908	20827568	18282684	17483928	14604938	14978734	16193482	13131866	17041508	13299354	16164250	16325934	tr|Q8W4D6|Q8W4D6_ARATH	Q8W4D6	1	15	15	65707.931	"92.2,99.0,95.3,99.0,99.0,99.7,98.6,99.6,99.7,99.0,99.7,99.7,99.7,99.7,98.1"	"AEFSGYVFTR,AFQDYNNR,ALIFDQGNR,FEFTETER,GGYVELSK,LDDVNPVGLGR,LDVAPPSPQSPPSPPTLK,LSLPLGTTLDR,QGTYFQDTTASK,QIFDEVWR,QRPVDGLAGAQQDLR,SAESLDGWEIR,SGLGYTIIRPGPLK,VDHLGVYNLTK,YDGGMDAK"	tr|Q8W4D6|Q8W4D6_ARATH High chlorophyll fluorescence phenotype 173 protein OS=Arabidopsis thaliana GN=F17F16.7 PE=2 SV=1	tr|Q8W4D6|Q8W4D6_ARATH	"1175.560628,1026.452348,1032.535208,1057.472562,851.438794,1153.608684,1826.979044,1184.675106,1345.614434,1091.540046,1622.847309,1261.592768,1470.8541085,1257.6718945,855.342"	"ALIFDQGNR,LDDVNPVGLGR,SAESLDGWEIR"	F17F16	http://www.uniprot.org/uniprot/Q8W4D6	27.090301
24932060	25410032	26621864	23412664	22173540	23309408	26001688	22724836	23655840	17532340	22278328	22392756	tr|Q94KE3|Q94KE3_ARATH	Q94KE3	2	15	5	57494.588	"99.7,99.7,99.7,99.7,99.0,99.7,99.7,99.7,99.7,98.3,99.0,99.7,99.7,99.7,99.7"	"DKEVISTWGVQNK,EVISTWGVQNK,GLYPVETISTVGR,HPAESTSATNESVLK,IVGTLGPK,LGDLSQTQIFAK,MHSSHLLLEEPIR | Oxidation [M1],SSFFPALTK,SVEALSGCLK | Carbamidomethyl [C8],VFNQDLYFK,VGDASVVK,VVDSMTDNLRPTR,VVDSMTDNLRPTR | Oxidation [M5],YRPTMPVISVVIPR,YRPTMPVISVVIPR | Oxidation [M5]"	tr|Q94KE3|Q94KE3_ARATH Pyruvate kinase OS=Arabidopsis thaliana GN=At3g52990 PE=2 SV=1	"tr|Q94KE3|Q94KE3_ARATH,tr|Q9SJQ0|Q9SJQ0_ARATH"	"1502.77127,1259.65035,1390.74553133,1569.762202,783.485246,1319.707698,1576.802556,996.527502,1062.53744,1172.585942,773.427868,1502.752182,1518.745749,1626.928113,1642.922589"	"LGDLSQTQIFAK,VFNQDLYFK,YRPTMPVISVVIPR | Oxidation [M5]"	At3g52990	http://www.uniprot.org/uniprot/Q94KE3	25.996205
16251267	20354404	17661832	19444960	15004336	17610308	9171429	7.38919e+06	7.83748e+06	7.09164e+06	7956437	7410493	tr|Q9FF91|Q9FF91_ARATH	Q9FF91	1	15	15	103925.692	"99.1,99.7,99.0,99.6,99.0,99.7,99.0,97.3,99.7,99.7,99.7,99.7,99.7,99.7,99.4"	"AAVESEMEVLSR | Oxidation [M7],AVSAHNALVAEVEK,DLQETSSR,ETEQSIVLNEMER,EYAVNLGK,GAAADVEQGTVQVSDK,LEDLMSNK,LQYELEVER,LSGFIDIDK,SIESNDVAQK,SPVPESTDGSKDELNIYSQDELDDNR,SSADNLAGWDDSDNDDK,VANSEESNLKDEDK,VIETDTQPSDLCTR | Carbamidomethyl [C12],WLISASSALSR"	tr|Q9FF91|Q9FF91_ARATH Uncharacterized protein OS=Arabidopsis thaliana GN=At5g23890 PE=1 SV=1	tr|Q9FF91|Q9FF91_ARATH	"1335.63038,1436.762082,934.434164,1576.7391535,892.46606,1573.758282,948.458818,1177.598074,1006.533664,1089.529936,2922.3008475,1823.708224,1576.7208775,1633.761792,1189.646518"	"LSGFIDIDK,VIETDTQPSDLCTR | Carbamidomethyl [C12],LQYELEVER"	At5g23890	http://www.uniprot.org/uniprot/Q9FF91	19.978858
15790975	16904532	17997412	18428744	14288619	16044089	17572168	15376924	17576992	16562219	15282743	19503984	tr|Q9LV35|Q9LV35_ARATH	Q9LV35	1	15	15	66040.719	"99.7,99.7,99.7,99.7,99.7,99.7,99.7,99.7,99.1,99.7,99.1,99.7,99.7,99.7,99.7"	"CFAAHEEEIVTSGYDNK | Carbamidomethyl [C1],DDQCTNEESIDIGNQPK | Carbamidomethyl [C4],GNADYILSGSYDGLICK | Carbamidomethyl [C16],IDDLQWSADGMR,IDDLQWSADGMR | Oxidation [M11],ISYKDDQCTNEESIDIGNQPK | Carbamidomethyl [C8],IWGAYNDHVLK,LHLYSINGDSLTEEAVLER,NVSSLAVLK,QVLTVSADK,SDTILYTNGR,SVVTLDLNNPLK,TCEILGELSSDDGHK | Carbamidomethyl [C2],YSPDLSMFASADLNR,YSPDLSMFASADLNR | Oxidation [M7]"	tr|Q9LV35|Q9LV35_ARATH WD40 domain-containing protein OS=Arabidopsis thaliana GN=At3g18060 PE=2 SV=1	tr|Q9LV35|Q9LV35_ARATH	"1968.852562,1961.829188,1844.86314,1405.628726,1421.623804,2453.1013665,1314.67233,2158.088898,929.554762,959.528902,1138.562052,1311.739598,1659.73998833,1685.771576,1701.765596"	"SVVTLDLNNPLK,TCEILGELSSDDGHK | Carbamidomethyl [C2],QVLTVSADK"	At3g18060	http://www.uniprot.org/uniprot/Q9LV35	27.422003
78710800	71954856	59464032	86589384	72337328	74152072	67460240	71681576	67604088	76463728	79874048	75215640	tr|Q9SUR0|Q9SUR0_ARATH	Q9SUR0	1	15	15	17517.557	"99.7,99.7,99.7,99.7,99.7,99.7,99.7,99.7,99.6,99.5,99.0,96.1,99.7,97.3,99.7"	"GLDGHVMEHLK,GLDGHVMEHLK | Oxidation [M7],NDDFPEPSGYMK,NDDFPEPSGYMK | Oxidation [M11],QMVVDIEGHVNK,QMVVDIEGHVNK | Oxidation [M2],QMVVDIEGHVNKA,QMVVDIEGHVNKA | Oxidation [M2],RNDDFPEPSGYMK,RNDDFPEPSGYMK | Oxidation [M12],SEDSCVCK | Carbamidomethyl [C5 C7],SENHVFADAIGHHIQNVVVHEGEHDSHGSIR,SWDYTYDGK,SWDYTYDGKK,VFDIIYEFIPK"	tr|Q9SUR0|Q9SUR0_ARATH AT4G23670 protein OS=Arabidopsis thaliana GN=F9D16.140 PE=2 SV=1	tr|Q9SUR0|Q9SUR0_ARATH	"1234.612667,1250.60741,1398.57572,1414.57079,1367.6867495,1383.6816115,1438.724034,1454.719003,1554.677949,1570.6715875,983.365814,3426.619315,1133.466516,1261.561317,1382.748502"	"SWDYTYDGK,GLDGHVMEHLK,NDDFPEPSGYMK"	F9D16	http://www.uniprot.org/uniprot/Q9SUR0	64.238411
12249593	15634846	12827203	12547649	10647582	11300652	14699197	11130167	14861688	7836911	11000515	13407416	sp|C0LGN2|Y3148_ARATH	C0LGN2	5	14	12	112275.179	"97.9,99.7,99.7,99.7,99.7,99.0,99.7,99.3,99.0,99.7,99.0,96.6,99.2,99.7"	"ATNVLLDK,EEVDALQSVATALK,EQNTLLEVVDPR,GLAYLHEESR,IPPELGNLPNLK,ISDFGLAK,ITDLSGPESPFPPLR,LLEASVNNEK,LTTLTDLR,NGWVSSNTGNFLDDDR,NLDLSFNK,VAGTYGYMAPEYAMR | Oxidation [M8 M14],VATDNFDPANK,YDADTWDTPGYYDSK"	sp|C0LGN2|Y3148_ARATH Probable leucine-rich repeat receptor-like serine/threonine-protein kinase At3g14840 OS=Arabidopsis thaliana GN=LRR-RLK PE=2 SV=1	"sp|C0LGG8|Y5343_ARATH,sp|Q9SKB2|SBIR1_ARATH,tr|F4HRH4|F4HRH4_ARATH,sp|C0LGG9|Y5344_ARATH,sp|C0LGN2|Y3148_ARATH"	"872.495866,1472.771914,1411.73,1173.577467,1303.749926,849.459557,1624.846214,1115.580834,931.533776,1795.775738,949.487224,1710.737364,1190.555582,1795.72115"	"LTTLTDLR,ATNVLLDK,NLDLSFNK"	LRR	http://www.uniprot.org/uniprot/C0LGN2	15.882353
9584397	12718085	11908756	13813847	11749010	12274586	11643598	8.29259e+06	12592908	10164744	14331372	12567818	sp|F4J5S1|CLU_ARATH	F4J5S1	3	14	0	153686.831	"99.7,99.7,99.7,99.5,96.4,99.1,96.3,99.7,99.7,98.0,99.7,99.7,99.7,99.7"	"AAQSTTTNSTTDVK,ADEGGDDSSNVSADTSK,ADESESQVENNDAQPK,AHPDLIHAFQNAAATGR,AKYEFELPELSR,EHSVIDASETVFK,LAAPVECK | Carbamidomethyl [C7],LINSTSEEIR,MELQLNPGDSVMDIR,TENLAPAGLGAGLTSLDK,TNALNSAVLGETQPR,VGDALIDGEANGASNSDQK,VSSYLVDVVLPK,VVAQSVLPGILQGDK"	sp|F4J5S1|CLU_ARATH Clustered mitochondria protein OS=Arabidopsis thaliana GN=FMT PE=2 SV=1	"tr|F4J5S0|F4J5S0_ARATH,sp|F4J5S1|CLU_ARATH,tr|F4J5R9|F4J5R9_ARATH"	"1423.6761,1653.658826,1759.749708,1788.902116,1480.755411,1460.712396,886.457686,1160.603786,1716.817134,1726.908946,1569.811554,1859.851218,1317.75655,1522.870898"	"VVAQSVLPGILQGDK,TNALNSAVLGETQPR,VSSYLVDVVLPK"	FMT	http://www.uniprot.org/uniprot/F4J5S1	14.285714
11150098	11966659	13601927	12756071	11232825	13503707	12743812	10370828	13683697	13400987	13664255	13676411	sp|F4JLM5|SYIC_ARATH	F4JLM5	1	14	14	135482.37	"99.3,99.2,99.7,99.7,97.4,99.7,99.7,99.7,99.0,99.7,99.7,99.7,99.7,99.7"	"EYVLEELNVR,FHNWLENAR,FLDNLTNIYVR,GAKPESAADSYEVLEK,GDEFGVLR,LYLINSPVVR,NLICNGLVLAEDGK | Carbamidomethyl [C4],QVLVSQEQNIK,SDTPLIYR,SEFQAGDGK,SNEQTEWVPGYVK,TGSFTHSYPFCWR | Carbamidomethyl [C11],TPLSNFEAGQNYK,VVADDYVTDDSGTGIVHCAPAFGEDDYR | Carbamidomethyl [C18]"	"sp|F4JLM5|SYIC_ARATH Isoleucine--tRNA ligase, cytoplasmic OS=Arabidopsis thaliana GN=At4g10320 PE=2 SV=1"	sp|F4JLM5|SYIC_ARATH	"1262.649326,1185.5676945,1366.72493,1692.819423,891.444818,1172.690782,1514.775902,1284.703792,963.501956,937.412986,1535.724762,1644.714429,1467.699676,3043.312194"	"LYLINSPVVR,QVLVSQEQNIK,TPLSNFEAGQNYK"	At4g10320	http://www.uniprot.org/uniprot/F4JLM5	14.537815
7713127	32273788	11049580	18881904	9106342	23664372	12292374	9186021	14420201	54646496	25375400	7883987	sp|K1C9_HUMAN|	K1C9_HUMAN	1	14	14	62128.731	"99.7,99.7,99.7,99.4,99.7,99.7,99.7,99.7,97.8,99.7,99.7,99.7,99.5,99.7"	"EIETYHNLLEGGQEDFESSGAGK,FSSSSGYGGGSSR,GGGGSFGYSYGGGSGGGFSASSLGGGFGGGSR,GGSGGSHGGGSGFGGESGGSYGGGEEASGSGGGYGGGSGK,GGSGGSYGGGGSGGGYGGGSGSR,HGVQELEIELQSQLSK,IKFEMEQNLR,IKFEMEQNLR | Oxidation [M5],NYSPYYNTIDDLK,QEYEQLIAK,QVLDNLTMEK,SGGGGGGGLGSGGSIR,STMQELNSR | Oxidation [M3],VQALEEANNDLENK"	sp|K1C9_HUMAN|	sp|K1C9_HUMAN|	"2509.122447,1234.521118,2704.156205,3222.277656,1790.719554,1836.958518,1306.669716,1322.665821,1604.7405,1120.57635,1189.600328,1231.589522,1080.48504,1585.7591055"	"SGGGGGGGLGSGGSIR,FSSSSGYGGGSSR,VQALEEANNDLENK"		http://www.uniprot.org/uniprot/K1C9_HUMAN	36.597111
46180888	85628024	61025560	49546508	37678424	51051208	62273992	40199952	71116032	46007912	50888824	47305220	sp|O04153|CALR3_ARATH	O04153	3	14	0	49843.295	"99.7,99.0,99.7,99.7,99.7,99.7,99.0,99.7,99.6,99.7,99.7,99.2,95.5,99.7"	"AKEPEDWDEEENGLWEPPK,ELFAEAEK,EPEDWDEEENGLWEPPK,EYIDDPNDVKPEGFDSIPR,GIQTYNDAK,IEQDIECGGAYIK | Carbamidomethyl [C7],KPEDWDDR,LHVIVSYQGQNYPIK,LLSGYVNQK,QFGGDTPYSLMFGPDICGTQTK | Carbamidomethyl [C17] Oxidation [M11],SIVDDYFAQHR,TLVVQYSVK,WPGDPDNK,YAGIEVWQVK"	sp|O04153|CALR3_ARATH Calreticulin-3 OS=Arabidopsis thaliana GN=CRT3 PE=1 SV=2	"sp|O04153|CALR3_ARATH,tr|F4HW30|F4HW30_ARATH,tr|F4HW29|F4HW29_ARATH"	"2297.012634,935.459952,2097.88088,2205.021918,1008.48728,1494.700906,1059.462161,1757.945874,1020.560774,2435.0784055,1349.636587,1035.596436,927.408706,1191.629777"	"LLSGYVNQK,ELFAEAEK,EYIDDPNDVKPEGFDSIPR"	CRT3	http://www.uniprot.org/uniprot/O04153	37.735849
20729576	20317592	23643748	26047832	20745996	24770708	21912040	19313436	24852972	18966644	19543776	26727088	sp|O04450|TCPE_ARATH	O04450	1	14	14	59383.791	"99.0,99.7,99.4,98.4,99.7,99.7,99.7,99.7,98.1,99.6,98.9,99.0,99.0,98.4"	"DVNLDLIK,ENIPFYGIDCNDVGTNDMR | Carbamidomethyl [C10],EQNVFETLIGK,FQELTPEK,IAEGYEMASR,IAEGYEMASR | Oxidation [M7],KQEQQYFDEMVQK,QEQQYFDEMVQK,QIEDAHIAILTCPFEPPKPK | Carbamidomethyl [C12],QQQILLATQVVK,SIHDALCVAR | Carbamidomethyl [C7],SLAEIAVK,VAVEHLER,VDIDTVEK"	sp|O04450|TCPE_ARATH T-complex protein 1 subunit epsilon OS=Arabidopsis thaliana GN=CCT5 PE=1 SV=1	sp|O04450|TCPE_ARATH	"928.522964,2228.947978,1276.666102,990.502022,1125.512408,1141.507382,1699.787028,1571.691942,2303.19786,1367.81216,1140.571218,829.490888,951.513591,917.470062"	"QQQILLATQVVK,EQNVFETLIGK,DVNLDLIK"	CCT5	http://www.uniprot.org/uniprot/O04450	25.233645
34337772	34612392	33791444	35682248	34496444	34328240	34926144	32403264	32897144	30418664	32201204	33885716	sp|O23627|SYGM1_ARATH	O23627	1	14	14	81942.828	"99.7,99.7,99.0,99.7,97.4,99.7,99.5,99.7,99.6,99.0,99.0,99.7,93.5,99.7"	"AAKPEIDAAIEQLNK,AGDEQLNLFR,AVVNTLER,CTVFPLVQNQQFEEVAK | Carbamidomethyl [C1],ELASVGISHK,ELQSIISSSGNGSLNR,EYGITAPDTK,GTVNNETLGYFIGR,IDITGTSIGK,KLCLGEAVAK | Carbamidomethyl [C3],LEFLMFPR | Oxidation [M5],LPFAAAQIGQAFR,SNVLSFWR,SSSVEAQGNAVR"	"sp|O23627|SYGM1_ARATH Glycine--tRNA ligase, mitochondrial 1 OS=Arabidopsis thaliana GN=At1g29880 PE=1 SV=1"	sp|O23627|SYGM1_ARATH	"1609.8650485,1161.577774,900.50277,2036.0073365,1039.565702,1660.837428,1093.528504,1539.770188,1003.55492,1087.605886,1067.5471,1388.75537933,1007.519128,1203.583486"	"AVVNTLER,IDITGTSIGK,SNVLSFWR"	At1g29880	http://www.uniprot.org/uniprot/O23627	22.085048
21604600	25989088	25472508	26435952	23027688	25154660	26917720	20162132	25004872	18532788	27129028	23410904	sp|O24653|GDI2_ARATH	O24653	2	14	9	49537.96	"99.7,99.7,96.8,99.7,99.7,99.7,99.0,99.7,99.6,94.7,99.7,96.5,99.7,99.6"	"APEHLGASR,AVDGSYVFVK,FFSFVQEYDEK,IVCDPSYLPNK | Carbamidomethyl [C3],LSAVYGGTYMLNKPECK | Carbamidomethyl [C16],LSAVYGGTYMLNKPECK | Carbamidomethyl [C16] Oxidation [M10],LYAESLAR,SDMYVFCCSYSHNVAPK | Carbamidomethyl [C7 C8] Oxidation [M3],SSLMGIFEK,SSLMGIFEK | Oxidation [M4],TLIHTDVTK,VEFDEGGK,VIGVTSEGETAK,VPATPMEALK"	sp|O24653|GDI2_ARATH Guanosine nucleotide diphosphate dissociation inhibitor 2 OS=Arabidopsis thaliana GN=GDI2 PE=2 SV=1	"sp|O24653|GDI2_ARATH,sp|Q96254|GDI1_ARATH"	"936.47625,1083.55805,1437.643094,1304.643222,1929.9342,1945.9280755,921.491578,2079.848436,1010.51152,1026.505636,1026.5706925,879.397034,1189.618396,1055.56984"	"VIGVTSEGETAK,IVCDPSYLPNK | Carbamidomethyl [C3],FFSFVQEYDEK"	GDI2	http://www.uniprot.org/uniprot/O24653	29.504505
84691632	72029624	83326880	86809464	74964864	84736240	63218180	69700400	74367632	75485032	84906264	75849776	sp|O48741|PORC_ARATH	O48741	2	14	0	43882.427	"99.7,99.7,99.7,99.7,97.6,99.7,99.7,94.3,99.7,99.7,99.7,99.3,99.0,99.0"	"GLASGLNGQNSSMIDGGEFDGAK,GLASGLNGQNSSMIDGGEFDGAK | Deamidated [N7],GLASGLNGQNSSMIDGGEFDGAK | Oxidation [M13],GTAVITGASSGLGLATAK,GYVSEEEAGK,GYVSEEEAGKR,KGTAVITGASSGLGLATAK,KLWEVSEK,LAQVVSDPSLGK,RTEQPLDVLVCNAAVYQPTAK | Carbamidomethyl [C11],SGVYWSWNNNSSSFENQLSK,VCNMLTMQELHR | Carbamidomethyl [C2] Oxidation [M4 M7],WHVIMACR | Carbamidomethyl [C7],WHVIMACR | Carbamidomethyl [C7] Oxidation [M5]"	"sp|O48741|PORC_ARATH Protochlorophyllide reductase C, chloroplastic OS=Arabidopsis thaliana GN=PORC PE=1 SV=1"	"tr|F4I2F8|F4I2F8_ARATH,sp|O48741|PORC_ARATH"	"2223.99752875,2224.994592,2239.99752933,1573.8675235,1067.476916,1223.57777,1701.96313,1017.549648,1212.671873,2372.219478,2333.0350145,1562.698892,1071.510279,1087.505013"	"LAQVVSDPSLGK,GTAVITGASSGLGLATAK,KGTAVITGASSGLGLATAK"	PORC	http://www.uniprot.org/uniprot/O48741	33.416459
6.45532e+06	7.38507e+06	7.33125e+06	6734580	5.91318e+06	6.89291e+06	7417241	6.07663e+06	6987717	6.02144e+06	8798479	6721798	sp|O65570|VILI4_ARATH	O65570	1	14	14	109326.04	"99.7,99.7,99.7,99.7,95.9,98.2,99.7,99.1,95.4,99.6,95.6,99.7,99.6,99.7"	"DLDPAFQGAGQK,EGVEDEEDLPAHPYDR,EVDDDTYNENGVALFR,FFTSWDSSK,GGISSGYK,GQANPVEGDTLK,IENFIPTPIPK,IESLTIQEDAK,IPPQEPSIPKPVK,LLALTIGEK,NLSTPPPVVR,SPAFNALAATFESQNAR,TPESPAPESNSK,TTSTDPVSDIDVTR"	sp|O65570|VILI4_ARATH Villin-4 OS=Arabidopsis thaliana GN=VLN4 PE=1 SV=1	sp|O65570|VILI4_ARATH	"1245.598306,1869.8010555,1855.818776,1103.492542,767.380908,1227.609792,1267.71627,1245.642558,1428.832458,956.590652,1078.613532,1793.869172,1242.571778,1505.71926"	"IENFIPTPIPK,IESLTIQEDAK,FFTSWDSSK"	VLN4	http://www.uniprot.org/uniprot/O65570	17.453799
162338864	196080848	172607088	182193776	154015456	197702864	187636128	192595392	185563200	180880816	160783520	179793488	sp|P0DKC3|PGP1A_ARATH	P0DKC3	3	14	0	39761.182	"99.7,99.7,99.7,99.3,99.7,99.7,99.7,99.7,97.8,99.7,99.7,99.4,99.4,99.7"	"DAVTHLTDAQEWAGGGSMVGALVGSTQR | Oxidation [M18],ELELAGFQYLGGPDDGKR,ENPGCLFIATNR | Carbamidomethyl [C5],IQPDFYTSK,IQYGTLCIR | Carbamidomethyl [C7],KVYVIGEEGILK,LDTDILFGQNGGCK | Carbamidomethyl [C13],LDTDILFGQNGGCK | Carbamidomethyl [C13] Deamidated [N10],LIEGVPETLDMLR,LIEGVPETLDMLR | Oxidation [M11],LVFVTNNSTK,SQICMVGDR | Carbamidomethyl [C4],SQICMVGDR | Carbamidomethyl [C4] Oxidation [M5],VYVIGEE…	"sp|P0DKC3|PGP1A_ARATH Phosphoglycolate phosphatase 1A, chloroplastic OS=Arabidopsis thaliana GN=PGLP1A PE=1 SV=1"	"sp|Q8GWU0|PGP2_ARATH,sp|P0DKC3|PGP1A_ARATH,sp|P0DKC4|PGP1B_ARATH"	"2829.335174,1963.963833,1390.665798,1097.539584,1122.586396,1346.780721,1536.7236875,1537.707168,1484.78965,1500.785429,1121.607778,1064.474366,1080.469395,1218.685008"	"LVFVTNNSTK,VYVIGEEGILK,LDTDILFGQNGGCK | Carbamidomethyl [C13]"	PGLP1A	http://www.uniprot.org/uniprot/P0DKC3	37.016575
214590384	229483680	227409632	223735792	205100960	213516768	240540000	199469824	219278800	238891536	233245424	241708192	sp|P25851|F16P1_ARATH	P25851	1	14	14	45161.369	"99.7,99.7,99.7,99.7,99.7,99.7,99.7,99.7,99.0,99.7,99.7,99.7,99.7,99.7"	"AGISNLTGVQGAVNIQGEDQK,AGISNLTGVQGAVNIQGEDQK | Deamidated [N5],IYSFNEGNYQMWDDK,IYSFNEGNYQMWDDK | Oxidation [M11],KLDVISNEVFSNCLR | Carbamidomethyl [C13],LDVISNEVFSNCLR | Carbamidomethyl [C12],LLYECAPMSFIVEQAGGK | Carbamidomethyl [C5],LLYECAPMSFIVEQAGGK | Carbamidomethyl [C5] Oxidation [M8],QIASLVQR,TLLYGGIYGYPR,VLDIQPTEIHQR,VPLYIGSTEEVEK,YIDDLKDPGPTGKPYSAR,YIGSLVGDFHR"	"sp|P25851|F16P1_ARATH Fructose-1,6-bisphosphatase, chloroplastic OS=Arabidopsis thaliana GN=FBP PE=1 SV=2"	sp|P25851|F16P1_ARATH	"2098.06532875,2099.041707,1908.797778,1924.795174,1792.914004,1664.818879,2011.976722,2027.97101,913.53469,1371.717568,1447.7781435,1462.754648,1991.99632,1262.640602"	"VPLYIGSTEEVEK,VLDIQPTEIHQR,QIASLVQR"	FBP	http://www.uniprot.org/uniprot/P25851	34.292566
115488520	405537216	164840400	188926816	139457744	183782112	202632592	174023488	213315184	164493552	200178112	134678000	sp|P28493|PR5_ARATH	P28493	1	14	14	25252.079	"99.7,99.7,99.7,99.7,99.7,99.7,99.7,99.6,99.7,99.7,99.7,99.7,99.7,99.7"	"CVTGDCGGLR | Carbamidomethyl [C1 C6],DFYDVSLVDGYNVK,FNTDQYCCR | Carbamidomethyl [C7 C8],GANDKPETCPPTDYSR | Carbamidomethyl [C9],LGDGGFELTPGASR,LGIRPSGGSGDCK | Carbamidomethyl [C12],NNCPTTVWAGTLAGQGPK | Carbamidomethyl [C3],QLTAPAGWSGR,TGCNFDASGNGR | Carbamidomethyl [C3],TGCNFDASGNGR | Carbamidomethyl [C3] Deamidated [N10],VMDQNNVVACK | Carbamidomethyl [C10],VMDQNNVVACK | Carbamidomethyl [C10] Ox…	sp|P28493|PR5_ARATH Pathogenesis-related protein 5 OS=Arabidopsis thaliana GN=At1g75040 PE=1 SV=1	sp|P28493|PR5_ARATH	"1093.464494,1632.7669255,1262.48125,1806.7837295,1375.672544,1302.6343925,1870.899319,1142.582964,1254.504074,1255.487784,1276.59114,1292.584798,1883.821034,1899.817258"	"LGDGGFELTPGASR,QLTAPAGWSGR,VMDQNNVVACK | Carbamidomethyl [C10]"	At1g75040	http://www.uniprot.org/uniprot/P28493	60.669456
79301632	102367848	110818832	102114584	84137160	115972496	96920032	86685320	115219304	83188616	91171904	94892032	sp|P29402|CALX1_ARATH	P29402	3	14	10	60485.429	"99.4,98.0,95.1,99.7,98.2,99.7,99.0,99.7,99.2,99.7,99.7,99.7,99.0,99.7"	"ANLLSGEDFEPALIPAK,ELDEPLNLK,FPPSVPYDK,FQEGLECGGAYLK | Carbamidomethyl [C7],ILVDGEEK,KANLLSGEDFEPALIPAK,KPEDWDER,LSHVYTAILKPDNEVR,NSDYEGVWK,QKAEEEAAGSADGLK,SEGHEDYGLLVSEK,SGEYVEHHLK,VVFDLLNK,WSSPLIDNPAYK"	sp|P29402|CALX1_ARATH Calnexin homolog 1 OS=Arabidopsis thaliana GN=CNX1 PE=1 SV=1	"sp|P29402|CALX1_ARATH,sp|Q38798|CALX2_ARATH,tr|F4K6M8|F4K6M8_ARATH"	"1783.935934,1069.565892,1048.521052,1470.681853,901.474922,1912.032105,1073.477564,1853.99994075,1096.482964,1502.72232833,1561.725228,1197.576944,946.54895,1389.6928595"	"VVFDLLNK,ELDEPLNLK,LSHVYTAILKPDNEVR"	CNX1	http://www.uniprot.org/uniprot/P29402	28.113208
450022496	498326944	507086560	502754432	499148032	525123936	487593440	427826176	512364160	421820960	547316864	536124896	sp|P34791|CP20C_ARATH	P34791	3	14	0	28207.879	"99.7,99.7,99.7,99.7,99.7,99.7,99.7,99.7,99.7,99.7,99.7,96.9,99.0,99.7"	"DFMIQGGDFTEGNGTGGISIYGAK,DFMIQGGDFTEGNGTGGISIYGAK | Oxidation [M3],FEDENFTLK,FEDENFTLK | Deamidated [N5],HTGPGILSMANAGPNTNGSQFFICTVK | Carbamidomethyl [C24],HTGPGILSMANAGPNTNGSQFFICTVK | Carbamidomethyl [C24] Deamidated [N17] Oxidation [M9],HTGPGILSMANAGPNTNGSQFFICTVK | Carbamidomethyl [C24] Oxidation [M9],HVVFGQVIEGMK,HVVFGQVIEGMK | Oxidation [M11],IVMGLFGEVVPK,IVMGLFGEVVPK | Oxidation [M3],IYA…	"sp|P34791|CP20C_ARATH Peptidyl-prolyl cis-trans isomerase CYP20-3, chloroplastic OS=Arabidopsis thaliana GN=CYP20-3 PE=1 SV=1"	"sp|P34791|CP20C_ARATH,tr|F4IX28|F4IX28_ARATH,tr|F4IX26|F4IX26_ARATH"	"2434.1105695,2450.10579086,1141.53023,1142.512098,2818.354182,2835.3333,2834.349563,1342.7060315,1358.7013835,1287.726844,1303.722076,1220.575396,962.46552,1509.744454"	"FEDENFTLK,IVMGLFGEVVPK | Oxidation [M3],IYACGELPLDA | Carbamidomethyl [C4]"	CYP20	http://www.uniprot.org/uniprot/P34791	45
26203204	27187592	25201660	27138412	22423512	22974644	26181824	18777568	25173812	24395296	27346932	25062664	sp|P42731|PABP2_ARATH	P42731	1	14	14	68671.667	"99.7,99.7,99.7,99.7,99.2,99.7,99.7,99.7,97.6,99.7,99.4,99.7,99.7,99.7"	"ALHDTFSSFGNIVSCK | Carbamidomethyl [C15],AVESLNGHK | Deamidated [N6],EIFSPFGTVTSSK,FDDKEWYVGR,FQSSNLYVK,GFGFVNFENADDAAR,GYGFVQYANEESAQK,MIESKPLYVAIAQR,NAFGEYGK,NLAESTTDDDLK,QVYVGPFLR,SGAGNIFIK,VAEAMDVLR,VAVDSSGQSK"	sp|P42731|PABP2_ARATH Polyadenylate-binding protein 2 OS=Arabidopsis thaliana GN=PAB2 PE=1 SV=1	sp|P42731|PABP2_ARATH	"1781.8408015,954.475929,1398.700976,1313.604411,1084.55443,1628.72091,1689.763856,1617.891213,884.402354,1320.604212,1077.596725,905.496544,1002.517198,976.479736"	"EIFSPFGTVTSSK,NLAESTTDDDLK,VAEAMDVLR"	PAB2	http://www.uniprot.org/uniprot/P42731	25.119237
19818744	19657516	19215648	23329400	21296404	17581724	27578160	14225127	26642336	21089460	26212704	23556176	sp|P42734|CADH9_ARATH	P42734	1	14	14	38933.307	"99.7,98.6,98.4,99.6,99.7,99.7,99.7,99.7,99.7,99.7,95.8,99.7,99.7,97.3"	"AEEAINHLGADSFLVTTDPQK,DNGENDVTVK,ETQEMLDFCAK | Carbamidomethyl [C9],ETQEMLDFCAK | Carbamidomethyl [C9] Oxidation [M5],HLGVAGLGGLGHVAVK,MDEINTAMER,MDEINTAMER | Oxidation [M1 M8],MDEINTAMER | Oxidation [M1],MVGGSDVGGMK | Oxidation [M1 M10],NYGGYSENIVVDQR,RDNGENDVTVK,SGVLSPFHFSR,VTVISSSSTK,YYGMTEAGK"	sp|P42734|CADH9_ARATH Probable cinnamyl alcohol dehydrogenase 9 OS=Arabidopsis thaliana GN=CAD9 PE=2 SV=2	sp|P42734|CADH9_ARATH	"2255.104956,1089.493662,1370.584409,1386.579413,1483.862169,1208.516026,1240.506198,1224.511532,1068.456152,1612.747984,1245.59203,1232.6302205,1007.549818,1018.442982"	"NYGGYSENIVVDQR,ETQEMLDFCAK | Carbamidomethyl [C9],HLGVAGLGGLGHVAVK"	CAD9	http://www.uniprot.org/uniprot/P42734	34.444444
71679376	77957136	73968496	71919464	59589972	64705576	69592504	53181236	74233088	62117888	67349664	66444776	sp|P48347|14310_ARATH	P48347	1	14	14	28914.915	"99.7,99.7,99.7,99.7,99.6,99.7,99.7,99.7,99.0,98.1,99.7,98.8,99.7,99.7"	"AAVAAAENGLAPTHPVR,AAVAAAENGLAPTHPVR | Deamidated [N8],DNLTLWTSDLNEEGDER,EAADQSLEAYK,GADEPQDEN,HLIPSSNAVESTVFFYK,KEAADQSLEAYK,KRVEDELAK,NLVSVGYK,RVEDELAK,VCNDILSVIDK | Carbamidomethyl [C2],YDEMVEAMK | Oxidation [M4 M8],YDEMVEAMK | Oxidation [M8],YLAEFSSGAER"	sp|P48347|14310_ARATH 14-3-3-like protein GF14 epsilon OS=Arabidopsis thaliana GN=GRF10 PE=1 SV=1	sp|P48347|14310_ARATH	"1643.8738475,1644.857199,2005.886952,1223.566778,973.359774,1937.98696,1351.661703,1086.603309,878.486188,958.508016,1274.653374,1146.457364,1130.461932,1228.572486"	"VCNDILSVIDK | Carbamidomethyl [C2],EAADQSLEAYK,YLAEFSSGAER"	GRF10	http://www.uniprot.org/uniprot/P48347	47.244094
13221535	15855030	13820770	14858143	14643873	12660101	13420800	10385651	13389388	12072937	16117891	13700579	sp|P49227|RL52_ARATH	P49227	3	14	3	34436.533	"99.6,99.7,99.7,99.7,99.7,99.7,99.7,99.2,99.7,99.7,99.7,95.4,99.7,99.0"	"ALLDVGLIR,ALNGAGGDDDDEDDEE,DIVAQIVSASIAGDIVK,GALDGGLDIPHSDK,GALDGGLDIPHSDKR,GVEAESIEEMYK,GVEAESIEEMYK | Oxidation [M10],KGVEAESIEEMYK | Oxidation [M11],LLGEDEPEK,MLEMDDEYEGNVEATGEDFSVEPTDSR,NYIYGGHVSNYMK,NYIYGGHVSNYMK | Deamidated [N1],NYIYGGHVSNYMK | Oxidation [M12],QLDAEIHR"	sp|P49227|RL52_ARATH 60S ribosomal protein L5-2 OS=Arabidopsis thaliana GN=RPL5B PE=2 SV=3	"sp|P49227|RL52_ARATH,sp|Q8LBI1|RL51_ARATH,tr|F4J912|F4J912_ARATH"	"968.602402,1635.5649,1697.956889,1393.6840385,1549.78484367,1383.622222,1399.617066,1527.712394,1028.502784,3064.240356,1544.707865,1545.692949,1560.702917,980.503184"	"GVEAESIEEMYK,GVEAESIEEMYK | Oxidation [M10],KGVEAESIEEMYK | Oxidation [M11]"	RPL5B	http://www.uniprot.org/uniprot/P49227	42.192691
53670592	47319132	56033036	57429784	57792672	53198576	47745004	32757296	50450496	28990172	52822952	53961248	sp|P55826|PPOC_ARATH	P55826	1	14	14	57694.69	"99.7,99.7,99.0,99.7,99.7,97.4,99.7,99.7,99.7,99.7,98.4,96.2,96.1,99.0"	"AGFGALGIRPSPPGR,EESVEEFVR,GFGQLHPR,LEQNGGSIIGGTFK,LESGGYNLTYETPDGLVSVQSK,LESGGYNLTYETPDGLVSVQSK | Deamidated [N7],LIEPFCSGVYAGDPSK | Carbamidomethyl [C6],LPKPQGQTVGSFR,LYYPPVAAVSISYPK,MLIKPNSTDPLK,MLPEAISAR,NLGDEVFER,SEGELVEAVDR,VGGNIITR"	"sp|P55826|PPOC_ARATH Protoporphyrinogen oxidase 1, chloroplastic OS=Arabidopsis thaliana GN=PPOX1 PE=1 SV=1"	sp|P55826|PPOC_ARATH	"1451.799318,1122.519306,910.476822,1419.734956,2356.14683,2357.145906,1738.8245,1413.77343,1666.896011,1355.747841,986.52165,1077.509246,1202.577412,828.481726"	"EESVEEFVR,SEGELVEAVDR,LYYPPVAAVSISYPK"	PPOX1	http://www.uniprot.org/uniprot/P55826	29.981378
17158872	17492184	18949704	17884824	16379042	16792012	19293484	14666341	19440968	15184486	20042628	20267556	sp|P93042|RHD3_ARATH	P93042	2	14	13	89091.221	"99.0,99.0,99.7,96.6,99.7,97.1,97.4,99.5,97.1,99.7,99.7,96.9,99.7,99.7"	"AGALENFK,DLDLPAHK,ELEEAVQSGPVSGFGR,EQAANKPLLK,FATIFSHDSDSMPR,FIPTVMNLLK | Oxidation [M6],LDDELDNIEK,MLADLENYAR,SCAQSCISK | Carbamidomethyl [C2 C6],SISTIDSLASSTWEK,STLLNHLFGTNFR,TLITPVQCK | Carbamidomethyl [C8],TLTLALFNSTGNNATSK,TPLENLEPVLR"	sp|P93042|RHD3_ARATH Protein ROOT HAIR DEFECTIVE 3 OS=Arabidopsis thaliana GN=RHD3 PE=1 SV=1	"sp|P93042|RHD3_ARATH,sp|Q9FKE9|RHD32_ARATH"	"848.438888,907.476504,1660.804544,1110.63929,1609.720485,1190.673014,1202.566732,1194.570362,1039.439436,1623.79824,1518.794433,1058.579988,1751.90382,1279.713226"	"SISTIDSLASSTWEK,TPLENLEPVLR,AGALENFK"	RHD3	http://www.uniprot.org/uniprot/P93042	19.950125
16725668	18090744	17756368	18266984	17490460	18904652	18831488	13904921	18402328	16226024	19542808	18906760	sp|P93736|SYVM1_ARATH	P93736	1	14	14	125924.745	"97.9,99.6,99.4,99.6,99.7,99.7,99.7,99.6,99.7,98.4,99.4,99.7,99.7,99.7"	"DFPNGIPECGTDALR | Carbamidomethyl [C9],EAVVEALQK,ECFTMDEQR | Carbamidomethyl [C2],FAVHPFNGR,ILTEEELER,INTNGGSDFAGMPR,LEEGNLDPK,LGASLDWSR,LVNWDCILR | Carbamidomethyl [C6],MMSVSTYEEK,MMSVSTYEEK | Oxidation [M1 M2],NQYGGTILTQLR,TLANLSSLEVVSK,VETMLGDTAIAIHPDDAR"	"sp|P93736|SYVM1_ARATH Valine--tRNA ligase, mitochondrial 1 OS=Arabidopsis thaliana GN=TWN2 PE=2 SV=2"	sp|P93736|SYVM1_ARATH	"1660.751324,985.544268,1214.469778,1043.529843,1130.581526,1435.651324,1013.502508,1003.508168,1187.612828,1203.515276,1235.50486,1362.724538,1359.760696,1923.93819"	"ILTEEELER,EAVVEALQK,NQYGGTILTQLR"	TWN2	http://www.uniprot.org/uniprot/P93736	13.086643
86423440	80975544	74239552	68920800	63856328	72983224	75387776	65505620	69370552	75176744	70609096	71216080	sp|Q42290|MPPB_ARATH	Q42290	1	14	14	59159.22	"98.7,99.7,99.7,99.7,99.7,99.7,99.1,96.9,99.7,99.7,99.7,99.5,99.2,99.7"	"EQTTYYAK,HEEVVEQVK,HVGSDLTQR,IDAVDASTVK,IPTAELFAR,LSSDPTTTSQLVANEPASFTGSEVR,MVIAAAGAVK,MVIAAAGAVK | Oxidation [M1],SSLLLHMDGTSPIAEDIGR,SSLLLHMDGTSPIAEDIGR | Oxidation [M7],TILGPAQNVK,VATESNLSAK,VTTLPNGLR,YASPHPILASHNHILSAPETR"	sp|Q42290|MPPB_ARATH Probable mitochondrial-processing peptidase subunit beta OS=Arabidopsis thaliana GN=At3g02090 PE=2 SV=2	sp|Q42290|MPPB_ARATH	"1002.465332,1095.555856,1011.509122,1017.534206,1016.56574,2593.251174,929.537084,945.531504,2011.005894,2027.000341,1039.602476,1018.529174,969.56097,2310.18574775"	"TILGPAQNVK,VTTLPNGLR,IDAVDASTVK"	At3g02090	http://www.uniprot.org/uniprot/Q42290	28.060264
6.2651e+06	6345013	7.03075e+06	6.97434e+06	5548404	6711913	7.11663e+06	7953792	7.91508e+06	6355253	5687812	5874594	sp|Q8L7U5|BSL1_ARATH	Q8L7U5	3	14	13	96144.568	"99.7,99.7,99.6,99.7,99.5,99.7,99.7,99.2,99.7,99.7,99.7,99.7,99.7,99.7"	"AAQLGAGTLDEEPSTSDASSPIVESTTDGTANEGDVR,FSYAARPPSGSEPSFSMSEGLSLDENSLEK,GNHEAADINALFGFR,GRPQPDFDR,LAGVTNTVHSYDILTR,LNPDGDRPSAR,LTEASAAEAEVASSVWR,MVPMNNSDVPQPTK,QLSLDQFQNESR,TLETFWDDEDDAPGPR,VFGDLHGQFGDLMR,VIAALLRPR,VVVQGDGPGPR,YLVTVTGNDGK"	sp|Q8L7U5|BSL1_ARATH Serine/threonine-protein phosphatase BSL1 OS=Arabidopsis thaliana GN=BSL1 PE=1 SV=2	"sp|Q9SJF0|BSL2_ARATH,tr|F4HW26|F4HW26_ARATH,sp|Q8L7U5|BSL1_ARATH"	"3647.660395,3218.471076,1630.786902,1086.520668,1758.928782,1196.58945,1775.867638,1556.734348,1463.695687,1862.795672,1590.762723,1007.660346,1079.572296,1165.598262"	"VVVQGDGPGPR,LNPDGDRPSAR,QLSLDQFQNESR"	BSL1	http://www.uniprot.org/uniprot/Q8L7U5	25.198638
22484632	27105532	24053208	25341772	23624180	21681436	24269552	20284428	23899608	22813852	24523248	22203632	sp|Q8VZH2|APM1_ARATH	Q8VZH2	1	14	14	98177.707	"99.7,99.7,99.7,97.9,98.9,99.3,99.7,99.7,99.7,99.7,99.7,99.0,99.7,99.7"	"AAYVAVMQR,ELLGCSIADGSDK | Carbamidomethyl [C5],ETALLYDEQHSAASNK,ETDLSQEK,EVEEFFATR,EYFAVPYPLPK,INVDQAGFYR,MLQSYLGAEVFQK,NATESQSLTSIDR,NMAVTQFEPADAR,NQDALYGLSGVSWEGR,SGYESLLR,VHINANWVESIK,YDDSLAAGLR"	sp|Q8VZH2|APM1_ARATH Aminopeptidase M1 OS=Arabidopsis thaliana GN=APM1 PE=1 SV=1	sp|Q8VZH2|APM1_ARATH	"1007.522108,1363.627026,1775.832705,948.437868,1126.529074,1322.692068,1181.582674,1512.764446,1420.679154,1448.67127,1750.827412,923.471119,1408.7466705,1079.52492"	"SGYESLLR,NATESQSLTSIDR,EVEEFFATR"	APM1	http://www.uniprot.org/uniprot/Q8VZH2	18.316268
14819953	19630800	15487697	16372871	15203090	15689383	19721620	18409048	19572164	16169669	18863956	17752548	sp|Q93Y07|SFR2_ARATH	Q93Y07	1	14	14	70777.69	"97.7,99.7,99.7,99.7,99.7,96.9,97.6,99.0,99.7,99.0,99.7,99.7,99.0,99.0"	"AYDYIHGK,EAVNYEAVEHYK,ETPCSAEEAEAADK | Carbamidomethyl [C4],ETPCSAEEAEAADKK | Carbamidomethyl [C4],EVLADFNSIEHEEGK,FGHYQMDGLQDPLSR,FGHYQMDGLQDPLSR | Oxidation [M6],FGLVAVDR,LVETDEYSESGR,SLAWNELQK,TVDYFMDFTR,TVDYFMDFTR | Oxidation [M6],VLLMFHER,VLLMFHER | Oxidation [M4]"	"sp|Q93Y07|SFR2_ARATH Beta-glucosidase-like SFR2, chloroplastic OS=Arabidopsis thaliana GN=SFR2 PE=1 SV=1"	sp|Q93Y07|SFR2_ARATH	"965.460426,1450.6726405,1506.61497,1634.709036,1715.801416,1762.808148,1778.80458,875.486636,1383.615224,1087.5646,1293.570254,1309.564346,1043.558847,1059.55374"	"FGLVAVDR,SLAWNELQK,EAVNYEAVEHYK"	SFR2	http://www.uniprot.org/uniprot/Q93Y07	18.006431
16113162	15079413	19152488	16063371	15909393	18962048	20340632	22285024	19873992	26751788	16049100	20135300	sp|Q944H0|PEAM2_ARATH	Q944H0	3	14	6	56044.814	"99.4,99.7,99.7,99.7,99.7,99.0,99.7,99.0,99.7,99.0,99.7,99.7,99.0,99.0"	"DAGFDDVIAEDR,DTILHIQDKPALFR,EERPEVLSLIPPYEGK,FMCADVTSPDLK | Carbamidomethyl [C3],FMCADVTSPDLK | Carbamidomethyl [C3] Oxidation [M2],FTGELAQK,GYDLHDVQAYGQMLK,MDLKPGQK,NQNQICWIWQK | Carbamidomethyl [C6],SVLELGAGIGR,TDQFVQVLR,TYPDNSFDVIYSR,VFQECQTR | Carbamidomethyl [C5],WGLFIADK"	sp|Q944H0|PEAM2_ARATH Phosphomethylethanolamine N-methyltransferase OS=Arabidopsis thaliana GN=NMT2 PE=2 SV=2	"sp|Q944H0|PEAM2_ARATH,sp|Q9C6B9|PEAM3_ARATH,sp|Q9FR44|PEAM1_ARATH"	"1321.57908,1665.9201155,1854.972975,1382.61889,1398.615968,892.465152,1736.8181745,915.48436,1516.722029,1070.609204,1104.592348,1575.719434,1066.48668,948.507478"	"TDQFVQVLR,TYPDNSFDVIYSR,DAGFDDVIAEDR"	NMT2	http://www.uniprot.org/uniprot/Q944H0	29.531568
72503840	90054104	81660904	77290144	72711544	79283264	90354384	70857352	79316880	66200668	85826168	76050640	sp|Q944I4|GLYK_ARATH	Q944I4	3	14	0	51017.271	"99.7,99.7,99.7,97.7,99.0,99.0,99.7,99.7,99.7,99.7,99.7,99.7,99.7,99.2"	"AVDPQLEVVNK,AYLPTLYAEGPSGSDPDR,KNPGNALLEYR,LFQLNELK,LQAEIAMR,LQAEIAMR | Oxidation [M7],LSVETLEALSK,NLEAYYDAWDK,QDGQAGMSDEEVNDFVSR,QDGQAGMSDEEVNDFVSR | Oxidation [M7],VLAIDIDEER,VLAIDIDEERNPILAN,WLLYGSQLCR | Carbamidomethyl [C9],YIDAWVVIK"	"sp|Q944I4|GLYK_ARATH D-glycerate 3-kinase, chloroplastic OS=Arabidopsis thaliana GN=GLYK PE=1 SV=2"	"sp|Q944I4|GLYK_ARATH,tr|A8MQE0|A8MQE0_ARATH,tr|F4HS63|F4HS63_ARATH"	"1210.655072,1907.888454,1273.67483033,1003.570236,930.495678,946.49013,1188.660938,1386.606912,1982.827782,1998.823312,1171.60811,1793.952652,1294.648777,1105.616904"	"LSVETLEALSK,VLAIDIDEER,LFQLNELK"	GLYK	http://www.uniprot.org/uniprot/Q944I4	28.72807
32374340	23717792	28183680	28291412	29340452	26709020	24550400	22825684	31079656	25986612	19471196	21116636	sp|Q94B35|ISPH_ARATH	Q94B35	1	14	14	52780.312	"99.7,99.6,99.4,94.5,99.4,99.7,99.7,98.8,99.7,99.7,99.7,99.7,99.7,99.7"	"AYGFCWGVER | Carbamidomethyl [C5],EANYVCDYILGGQYDGSSSTK | Carbamidomethyl [C6],EYTSDILETLK,GETEEIGR,GIPSYWIDSEK,GIPSYWIDSEKR,GPITIGVTSGASTPDK,IIPVEDSK,LWITNEIIHNPTVNK,QDAIYELVEEK,VGIANQTTMLK,VGIANQTTMLK | Oxidation [M9],VQIVDTTCPWVTK | Carbamidomethyl [C8],YGVENVSGHFISFNTICDATQER | Carbamidomethyl [C17]"	"sp|Q94B35|ISPH_ARATH 4-hydroxy-3-methylbut-2-enyl diphosphate reductase, chloroplastic OS=Arabidopsis thaliana GN=ISPH PE=2 SV=1"	sp|Q94B35|ISPH_ARATH	"1243.544208,2326.006878,1310.658424,889.413716,1293.622562,1449.724881,1499.782316,899.49593,1790.9674195,1335.65437,1174.637124,1190.633034,1545.785412,2643.200583"	"GPITIGVTSGASTPDK,IIPVEDSK,VGIANQTTMLK"	ISPH	http://www.uniprot.org/uniprot/Q94B35	34.120172
17515400	21251092	19439224	19694048	18981256	18635704	20888572	21210776	20226412	17647464	18786284	18332964	sp|Q9C827|COB22_ARATH	Q9C827	7	14	0	104465.487	"99.7,99.7,99.7,92.1,99.7,99.7,99.7,99.0,99.7,99.7,99.6,99.7,96.1,99.7"	"ASEILPTIPK,DTNTFASASLDR,EIPVASMDNTGK,EIPVASMDNTGK | Oxidation [M7],ELGTCDLYPQSLK | Carbamidomethyl [C5],HNEIQTANIK,IPEAALMAR,IWHATTYR,LEDCLQLLVESNR | Carbamidomethyl [C4],LENTLNYGLER,QLGELAMSSGK | Oxidation [M7],SIGADYEVTDGER,SSMTLVEAFR | Oxidation [M3],VSEIVALWR"	sp|Q9C827|COB22_ARATH Coatomer subunit beta'-2 OS=Arabidopsis thaliana GN=At1g52360 PE=2 SV=1	"tr|F4HQE6|F4HQE6_ARATH,tr|F4HQF0|F4HQF0_ARATH,tr|F4ICX0|F4ICX0_ARATH,tr|F4J1E2|F4J1E2_ARATH,sp|Q8L828|COB23_ARATH,sp|Q9CAA0|COB21_ARATH,sp|Q9C827|COB22_ARATH"	"1067.62165,1296.595438,1260.60053,1276.596082,1522.733482,1166.604004,970.526926,1046.529675,1587.792646,1320.667868,1135.552732,1410.624858,1155.559526,1071.60718"	"IPEAALMAR,ELGTCDLYPQSLK | Carbamidomethyl [C5],VSEIVALWR"	At1g52360	http://www.uniprot.org/uniprot/Q9C827	15.226782
19558568	14984401	20184936	19535428	18074448	20124864	19655092	20025144	18976700	23388188	15082784	19957476	sp|Q9FNF2|SSY1_ARATH	Q9FNF2	1	14	14	72097.686	"99.7,99.7,99.7,99.7,99.7,99.6,99.7,99.7,99.7,99.0,99.7,99.7,99.6,99.0"	"AEVVNNLVFVTSEAAPYSK,AVEEGAAEVGIPSGK,DGVDWVFVDHK,FEPCGLNQLYAMR | Carbamidomethyl [C4],FEPCGLNQLYAMR | Carbamidomethyl [C4] Oxidation [M12],GAFGDNQFR,GWVGFNVPISHR,ITAGCDILLMPSR | Carbamidomethyl [C5],ITAGCDILLMPSR | Carbamidomethyl [C5] Oxidation [M10],QSWEGLMR,SYHRPGNPYGDSK,VTVNCFGGSQEVSFYHEYR | Carbamidomethyl [C5],YGTIPVVHGTGGLR,YRPYGVYK"	"sp|Q9FNF2|SSY1_ARATH Starch synthase 1, chloroplastic/amyloplastic OS=Arabidopsis thaliana GN=SS1 PE=2 SV=1"	sp|Q9FNF2|SSY1_ARATH	"2037.043638,1412.714637,1315.619946,1597.737644,1613.733364,1010.45798,1367.709864,1445.734166,1461.731486,1005.470278,1476.673509,2278.008243,1425.772352,1044.539604"	"AVEEGAAEVGIPSGK,GAFGDNQFR,YRPYGVYK"	SS1	http://www.uniprot.org/uniprot/Q9FNF2	23.619632
23990596	22959384	23556040	26269924	26065940	25066884	26867512	17122480	29503560	23369996	27223892	24272264	sp|Q9FXA2|PABP8_ARATH	Q9FXA2	1	14	14	72778.517	"99.7,99.7,99.7,99.7,99.7,99.7,99.7,99.7,99.7,99.7,99.7,99.7,99.7,99.7"	"ALNELNFMALNGR,ALNELNFMALNGR | Oxidation [M8],DSPTSQPVPIVALATR,EHFAPFGTITSCK | Carbamidomethyl [C12],GFGFVNFENSDDAAR,LANAAPEQQR,MIVTKPLYVALAQR,MIVTKPLYVALAQR | Oxidation [M1],NLSESLSDEELNK,QVYVGPFVHK,SGVGNIFIK,SQGSNLYVK,VAVDPSGQSK,VTEAMDVLR"	sp|Q9FXA2|PABP8_ARATH Polyadenylate-binding protein 8 OS=Arabidopsis thaliana GN=PAB8 PE=1 SV=1	sp|Q9FXA2|PABP8_ARATH	"1461.739616,1477.734798,1650.893032,1493.69745,1644.715408,1096.562206,1601.932173,1617.9272505,1476.693964,1172.634543,933.528692,994.507878,986.502018,1032.527036"	"SGVGNIFIK,NLSESLSDEELNK,DSPTSQPVPIVALATR"	PAB8	http://www.uniprot.org/uniprot/Q9FXA2	21.013413
36245156	28066072	28911472	27926044	25080336	26537720	27202368	18797228	27545800	23852188	23477760	25520756	sp|Q9LIR4|ILVD_ARATH	Q9LIR4	1	14	14	64912.888	"98.4,99.7,99.2,99.7,94.3,98.8,93.7,99.7,99.7,99.7,99.4,99.7,99.0,99.0"	"ECALLTDGR | Carbamidomethyl [C2],ETGHIQILR,FNTIGVSDAISMGTR,GDLAPDGSVAK,GGPGMPEMLTPTSAIMGAGLGK | Oxidation [M5 M8 M16],GMCFSLQSR | Carbamidomethyl [C3],GMCFSLQSR | Carbamidomethyl [C3] Oxidation [M2],IDTQVSPEEMNDR,IDTQVSPEEMNDR | Oxidation [M10],IGGTPAVLR,NGDIITIDIGK,VSDAVPFLADLKPSGK,YVMEDIHK,YVMEDIHK | Oxidation [M3]"	"sp|Q9LIR4|ILVD_ARATH Dihydroxy-acid dehydratase, chloroplastic OS=Arabidopsis thaliana GN=DHAD PE=1 SV=1"	sp|Q9LIR4|ILVD_ARATH	"1033.486838,1065.592948,1567.76526,1028.513508,2119.997956,1084.478902,1100.474492,1532.676588,1548.67145,882.528956,1157.628602,1642.894236,1033.490007,1049.485086"	"IGGTPAVLR,ECALLTDGR | Carbamidomethyl [C2],VSDAVPFLADLKPSGK"	DHAD	http://www.uniprot.org/uniprot/Q9LIR4	21.710526
5.68544e+06	6.95983e+06	5894606	7267623	5779374	5877623	6529729	5.12587e+06	7250957	5.90739e+06	7307216	6.22421e+06	sp|Q9LPC5|BIG3_ARATH	Q9LPC5	2	14	11	194940.362	"99.7,99.0,99.0,99.7,99.2,99.7,99.7,99.7,99.7,99.7,99.7,99.7,97.7,97.8"	"GEADPTGGPEALLLSK,INADLLLR,IVALELLK,IVDPAVDCIQK | Carbamidomethyl [C8],IVEIAHYNMNR,LELQEGISIFNQKPK,LNSEAIIDFVK,LQELGSSLESQEAPLLR,NLEEGSHPVENGK,SESDPSTTQSVQGFITK,TLIGDYLGER,VGDSPEEIAAFLK,VLENVAQPDFQQK,VVIPALDK"	sp|Q9LPC5|BIG3_ARATH Brefeldin A-inhibited guanine nucleotide-exchange protein 3 OS=Arabidopsis thaliana GN=BIG3 PE=1 SV=1	"sp|Q9LPC5|BIG3_ARATH,sp|Q9LZX8|BIG2_ARATH"	"1553.793388,926.554906,897.589766,1256.643423,1358.675163,1742.956956,1247.675966,1868.9842055,1408.65828,1810.85843,1135.58743,1374.703164,1514.776975,853.52769"	"IVALELLK,VVIPALDK,VLENVAQPDFQQK"	BIG3	http://www.uniprot.org/uniprot/Q9LPC5	9.771429
92568096	82778648	102069304	108640336	101274392	98244440	104555304	71222712	103259512	84382056	123449816	113229096	sp|Q9LY66|RK1_ARATH	Q9LY66	1	14	14	37631.943	"99.7,99.7,99.4,99.7,99.7,97.9,99.0,99.7,99.7,99.5,99.7,99.7,99.7,99.7"	"AGTVTANIPQAIEEFK,AGTVTANIPQAIEEFKK,EMIDFKPPTAN,EYDVNTAISLLK,FVESVEAHFR,GGFMEFDK,GGFMEFDK | Oxidation [M4],GTGQTVIVAVLAQGEK,KEYDVNTAISLLK,LIASPDMMVK,SAGADIVGSDDLIEQIK,SAHICSSMGPSIK | Carbamidomethyl [C5],SAHICSSMGPSIK | Carbamidomethyl [C5] Oxidation [M8],TGIVHIPFGK"	"sp|Q9LY66|RK1_ARATH 50S ribosomal protein L1, chloroplastic OS=Arabidopsis thaliana GN=RPL1 PE=1 SV=1"	sp|Q9LY66|RK1_ARATH	"1687.877744,1815.9725515,1261.599632,1364.717606,1219.598422,929.395878,945.389815,1569.872087,1492.8140465,1103.571396,1729.87347,1373.6425635,1389.6315165,1067.6122815"	"TGIVHIPFGK,AGTVTANIPQAIEEFKK,EYDVNTAISLLK"	RPL1	http://www.uniprot.org/uniprot/Q9LY66	36.127168
13758133	14102128	15387179	14195088	12483743	13278978	12777401	12262498	12338465	12921313	12288687	14399226	sp|Q9LZS3|GLGB2_ARATH	Q9LZS3	2	14	9	92590.267	"99.7,98.6,99.7,99.7,95.3,98.9,99.7,99.0,99.0,99.6,99.7,99.2,99.6,94.0"	"CISYAESHDQALVGDK | Carbamidomethyl [C1],DSIPAWIK,FDLGDADYLR,GYHWMWDSR,IYEAHVGMSSTEPMVNTYANFR,IYEIDPMLR,LSDGSVIPGNNFSYDK,MDTPSGIK,MDTPSGIK | Oxidation [M1],NTLDGLNMFDGTDAHYFHSGPR,QSAEFDSSSQAISASEK,TEDQTMNVVK,TIAFWLMDK | Oxidation [M7],VLVPDNLDDDPR"	"sp|Q9LZS3|GLGB2_ARATH 1,4-alpha-glucan-branching enzyme 2-2, chloroplastic/amyloplastic OS=Arabidopsis thaliana GN=SBE2.2 PE=2 SV=1"	"sp|Q9LZS3|GLGB2_ARATH,sp|O23647|GLGB1_ARATH"	"1791.807414,928.501766,1183.550223,1236.512859,2516.147706,1148.590456,1711.804178,847.409614,863.405944,2464.086584,1770.791598,1163.548196,1139.5687,1366.672068"	"FDLGDADYLR,VLVPDNLDDDPR,LSDGSVIPGNNFSYDK"	SBE2	http://www.uniprot.org/uniprot/Q9LZS3	20.869565
12063069	12161681	11153725	12711548	9138925	11455019	11838722	8956323	10376440	10365147	12984700	11643954	sp|Q9M2T9|SYMM_ARATH	Q9M2T9	2	14	0	69273.137	"99.7,99.2,96.7,99.7,99.7,99.7,99.7,99.7,99.6,99.7,99.2,99.7,99.7,99.2"	"ADYEGLYCVNCEEYK | Carbamidomethyl [C8 C11],ADYEGLYCVNCEEYKDEK | Carbamidomethyl [C8 C11],DLDIAYDK,ELLENNCCPVHQMPCVAR | Carbamidomethyl [C7 C8 C15],EVEFGNDGDYSEDR,IATSAAANGR,IVNAHLANTIGNLLNR,KEDNYFFALSK,MVFGHGFLTK,NCESTLVVDSTVAAEGVPLKDTVEK | Carbamidomethyl [C2],QGGVSAEEAAK,SLGNTLEPFELVQK,VIFITGTDEHGEK,YQKPLEDILAQNPR"	"sp|Q9M2T9|SYMM_ARATH Methionine--tRNA ligase, chloroplastic/mitochondrial OS=Arabidopsis thaliana GN=OVA1 PE=2 SV=1"	"sp|Q9M2T9|SYMM_ARATH,tr|A8MRF2|A8MRF2_ARATH"	"1911.76794,2283.929028,951.455612,2225.979135,1630.637521,930.486918,1731.974349,1360.665693,1135.58511,2660.323062,1045.502342,1573.833034,1444.71948,1683.89257"	"DLDIAYDK,SLGNTLEPFELVQK,VIFITGTDEHGEK"	OVA1	http://www.uniprot.org/uniprot/Q9M2T9	29.545455
93410832	105942400	88968872	75736496	67472864	70840672	92717528	78178168	85969592	82396496	82581848	74815312	sp|Q9S757|CYSC1_ARATH	Q9S757	1	14	14	39926.838	"99.0,99.7,99.7,99.6,98.6,99.7,99.7,99.7,99.4,99.7,98.2,99.0,99.7,99.7"	"DASLLIGK,DRPAIAMIADAEK,DRPAIAMIADAEK | Oxidation [M7],EAEEMKPVSVD,EAEEMKPVSVD | Oxidation [M5],EGLMVGISSGANTVAAIR,IIMTMPSYTSLER,IIMTMPSYTSLER | Oxidation [M3 M5],IIMTMPSYTSLER | Oxidation [M5],QEHFQPTCSIK | Carbamidomethyl [C8],RDASLLIGK,TPLVFLNK,VTEGCEAYVAAK | Carbamidomethyl [C5],YLSSVLFDELRK"	"sp|Q9S757|CYSC1_ARATH Bifunctional L-3-cyanoalanine synthase/cysteine synthase C1, mitochondrial OS=Arabidopsis thaliana GN=CYSC1 PE=1 SV=1"	sp|Q9S757|CYSC1_ARATH	"815.474938,1399.712913,1415.706948,1232.559388,1248.55391,1744.914891,1540.76371,1572.751496,1556.756841,1373.638211,971.575894,930.554024,1296.601352,1468.791969"	"TPLVFLNK,EAEEMKPVSVD,VTEGCEAYVAAK | Carbamidomethyl [C5]"	CYSC1	http://www.uniprot.org/uniprot/Q9S757	29.076087
47750348	41863120	45690672	48376148	50388636	44118176	45065144	45271128	46877460	45009304	39272120	48444800	sp|Q9S7B5|THRC1_ARATH	Q9S7B5	2	14	12	57776.32	"99.7,96.8,98.4,99.7,99.7,99.7,99.7,99.7,99.4,97.7,94.3,99.0,99.7,99.7"	"ADFGAVMDVLK | Oxidation [M7],DLGMTVLVSQVNR | Oxidation [M4],FSNPPVDVK,HCGISHTGSFK | Carbamidomethyl [C2],MCQELGLVDR | Carbamidomethyl [C2] Oxidation [M1],MVCAQAANANPLYLHYK | Carbamidomethyl [C3],NQGVIAPTDR,SGGLLDVEHDMEALK,SGGLLDVEHDMEALKR,SGGLLDVEHDMEALKR | Oxidation [M11],SNAVNPFSAK,STWPYGSGVWSK,TEDNIRDEAR,TVVVSTAHGLK"	"sp|Q9S7B5|THRC1_ARATH Threonine synthase 1, chloroplastic OS=Arabidopsis thaliana GN=TS1 PE=1 SV=1"	"sp|Q9SSP5|THRC2_ARATH,sp|Q9S7B5|THRC1_ARATH"	"1180.579562,1446.743982,1001.518782,1229.56017,1235.563522,1962.94497,1069.551664,1612.777689,1768.876852,1784.872776,1033.52155,1353.634928,1217.562345,1110.639479"	"SNAVNPFSAK,NQGVIAPTDR,FSNPPVDVK"	TS1	http://www.uniprot.org/uniprot/Q9S7B5	26.61597
53333744	95754880	61944392	48356520	42190452	46360836	51831144	67136992	46351768	76482392	32339708	41992908	sp|Q9S7E4|FDH_ARATH	Q9S7E4	1	14	14	42409.088	"99.7,99.1,99.7,99.7,99.7,99.7,99.7,99.7,99.6,99.7,99.4,97.5,97.2,99.6"	"CDVIVINMPLTEK | Carbamidomethyl [C1],DGELAPQYR,DWLESQGHQYIVTDDK,EGPDCELEK | Carbamidomethyl [C5],FVEDLNEMLPK,FVEDLNEMLPK | Oxidation [M8],GEDFPTENYIVK,GEWNVAGIAYR,GVLIVNNAR,LKPFGCNLLYHDR | Carbamidomethyl [C6],LQMAPELEK,LQMAPELEK | Oxidation [M3],NFVPGYNQVVK,TIGTVGAGR"	"sp|Q9S7E4|FDH_ARATH Formate dehydrogenase, chloroplastic/mitochondrial OS=Arabidopsis thaliana GN=FDH1 PE=1 SV=1"	sp|Q9S7E4|FDH_ARATH	"1530.779484,1047.498644,1932.886802,1075.44875,1333.657592,1349.652958,1410.665994,1234.608834,954.561326,1631.824107,1057.547692,1073.54375,1263.660804,830.460796"	"GVLIVNNAR,NFVPGYNQVVK,GEDFPTENYIVK"	FDH1	http://www.uniprot.org/uniprot/Q9S7E4	34.375
93579328	107339528	121532248	117366504	139341552	117840888	135306480	173705776	190681632	137722976	144682800	142117344	sp|Q9S7H1|PSAD1_ARATH	Q9S7H1	2	14	1	22597.604	"99.7,99.0,99.0,99.5,99.7,99.7,99.7,99.7,99.7,99.7,99.0,99.7,99.7,99.7"	"EAPVGFTPPQLDPNTPSPIFAGSTGGLLR,EGVGLNMR,EGVGLNMR | Oxidation [M7],EQCLALGTR | Carbamidomethyl [C3],EQIFEMPTGGAAIMR,EQIFEMPTGGAAIMR | Oxidation [M14],EQIFEMPTGGAAIMR | Oxidation [M6 M14],EQIFEMPTGGAAIMR | Oxidation [M6],KAQVEEFYVITWNSPK,KEQCLALGTR | Carbamidomethyl [C4],NVSPIEVK,TDSSAAAAAAPATK,VFPNGEVQYLHPK,VFPNGEVQYLHPK | Deamidated [N4]"	"sp|Q9S7H1|PSAD1_ARATH Photosystem I reaction center subunit II-1, chloroplastic OS=Arabidopsis thaliana GN=psaD1 PE=1 SV=1"	"sp|Q9SA56|PSAD2_ARATH,sp|Q9S7H1|PSAD1_ARATH"	"2935.517976,874.433358,890.42812,1046.518194,1649.7898575,1665.7849145,1681.7803225,1665.7855285,1937.9901305,1174.612536,884.497644,1231.603203,1526.78502067,1527.771849"	TDSSAAAAAAPATK	psaD1	http://www.uniprot.org/uniprot/Q9S7H1	54.326923
15775231	20744000	18718932	18646808	15217017	19113408	18842228	15278277	18487792	16076726	17389480	17838044	sp|Q9S7Z3|PCS1_ARATH	Q9S7Z3	1	14	14	54473.994	"99.7,98.6,99.7,95.9,99.7,99.7,99.7,98.8,99.7,99.7,99.7,99.7,99.7,99.5"	"ACCQGAEILSGSPSK | Carbamidomethyl [C2 C3],DESWIEIAK,EPGLLYTLSCK | Carbamidomethyl [C10],EVHETELFK,FLSTVGYEDSLTYAAAK,GPDDSEGTVVTGVVVR,ITEDSNQNLSAEEK,LIFNEALQK,LLWEAMDSIDQSTGK,LVSSQHVDSVEK,QTGTGHFSPIGGYNAER,SLPSNFNQFIR,SLPSPPAIDFSSAEGK,TSQSTIDDFRK"	sp|Q9S7Z3|PCS1_ARATH Glutathione gamma-glutamylcysteinyltransferase 1 OS=Arabidopsis thaliana GN=PCS1 PE=1 SV=1	sp|Q9S7Z3|PCS1_ARATH	"1563.701186,1089.534208,1279.648124,1130.560686,1834.89687,1585.792212,1576.720918,1074.607692,1692.803102,1326.676895,1790.8329295,1321.677086,1601.79226,1296.63168"	"SLPSNFNQFIR,LIFNEALQK,LVSSQHVDSVEK"	PCS1	http://www.uniprot.org/uniprot/Q9S7Z3	37.525773
14796417	17045844	16752166	17460644	16835824	17136800	20092972	13811686	19707064	13869915	21969524	19095280	sp|Q9SF16|TCPH_ARATH	Q9SF16	1	14	14	59775.681	"99.7,99.7,99.3,94.2,99.7,99.7,99.7,99.7,99.7,99.7,99.7,99.7,99.7,99.2"	"AQLVSNINACTAVGDVVR | Carbamidomethyl [C10],CAATTLSSK | Carbamidomethyl [C1],DSFLVDGVAFK,EAKPFIEDGVHAQNLIR,FNIFSGCPSGR | Carbamidomethyl [C7],GGADQFIEEAER,GSVTISNDGATIMK,INAINAATEAACLILSVDETVK | Carbamidomethyl [C12],LLDIVHPAAK,QLCDNAGFDATDVLNK | Carbamidomethyl [C3],SLHDAIMIVR,SLHDAIMIVR | Oxidation [M7],TASTLAIAK,TFSYAGFEQQPK"	sp|Q9SF16|TCPH_ARATH T-complex protein 1 subunit eta OS=Arabidopsis thaliana GN=CCT7 PE=1 SV=1	sp|Q9SF16|TCPH_ARATH	"1885.967203,937.453988,1196.607938,1936.018048,1240.565178,1320.59501,1392.690764,2315.208933,1075.63906967,1779.8101,1153.627851,1169.622345,874.512,1401.656894"	"GGADQFIEEAER,LLDIVHPAAK,TFSYAGFEQQPK"	CCT7	http://www.uniprot.org/uniprot/Q9SF16	30.70018
21834744	41221764	32665532	31477500	25407744	28713300	33061088	22886572	36959988	21055004	27261716	25468432	sp|Q9SRG3|PDI12_ARATH	Q9SRG3	1	14	14	56363.78	"99.7,99.7,99.4,99.0,95.0,98.1,99.6,99.7,99.0,99.7,99.2,99.7,99.7,99.7"	"AASELSSHNPPLALAK,ADYDFAHTLDAK,DFNGEALEK,EDFINFVEK,GESVEGPAVR,GFPTIYFR,IDASEEANK,IDASEEANKEFANEYK,IQGFPTLK,LDATANDIPSDTFDVK,NVVAVGVFPK,QSGPASVEIK,SADSATEVVGEK,TKEDFINFVEK"	sp|Q9SRG3|PDI12_ARATH Protein disulfide isomerase-like 1-2 OS=Arabidopsis thaliana GN=PDIL1-2 PE=2 SV=1	sp|Q9SRG3|PDI12_ARATH	"1604.8524835,1365.619814,1021.471898,1139.549042,999.49818,999.51812,975.44888,1856.842554,902.522692,1720.814192,1028.602694,1014.535038,1191.561248,1368.69153"	"NVVAVGVFPK,DFNGEALEK,GESVEGPAVR"	PDIL1	http://www.uniprot.org/uniprot/Q9SRG3	27.165354
25049372	26241088	26476044	27530460	24783396	24248776	24552952	19101072	26151380	21557008	27035756	24262776	sp|Q9SSB5|PRS7A_ARATH	Q9SSB5	1	14	14	47802.733	"99.6,99.7,99.0,99.7,99.7,99.7,99.7,99.7,99.7,99.7,94.3,99.7,99.4,99.1"	"ESDTGLAPPSQWDLVSDK,FDDGVGGDNEVQR,FVVGLGDK,GVLCYGPPGTGK | Carbamidomethyl [C4],IDPSVTMMTVEEKPDVTYNDVGGCK | Carbamidomethyl [C24],IISPNTEDAK,KVEFGLPDLESR,QMMQEEQPLQVAR,QMMQEEQPLQVAR | Oxidation [M3],SVCTEAGMYAIR | Carbamidomethyl [C3],SVCTEAGMYAIR | Carbamidomethyl [C3] Oxidation [M8],TYGLGPYSAPIK,VSPTDIEEGMR,YQIQIPLPPK"	sp|Q9SSB5|PRS7A_ARATH 26S protease regulatory subunit 7 homolog A OS=Arabidopsis thaliana GN=RPT1A PE=1 SV=1	sp|Q9SSB5|PRS7A_ARATH	"1943.913546,1406.606449,833.464592,1204.59207,2784.267186,1086.555448,1388.730864,1586.75364,1602.748592,1356.614562,1372.612252,1265.665568,1232.568728,1195.696338"	"FDDGVGGDNEVQR,FVVGLGDK,IISPNTEDAK"	RPT1A	http://www.uniprot.org/uniprot/Q9SSB5	36.619718
436334784	439931808	446599776	415812800	338413664	391957056	453136768	370873632	510763168	446332032	493532480	509240576	sp|Q9SSS9|ATPD_ARATH	Q9SSS9	1	14	14	25668.253	"99.0,99.7,99.7,99.7,99.7,99.7,99.7,98.0,99.0,99.7,99.7,98.7,99.7,99.7"	"EFELVYNK,INIVTEIVK,LEAPQLAQIAK,LEQVFSDPQVLNFFANPTITVEK | Deamidated [Q9],LTDTQLAEVR,NDTMELTVTDIEK,NDTMELTVTDIEK | Oxidation [M4],QLEDIASQLELGEIQLAT,QVIDDIVK,RNDTMELTVTDIEK,RNDTMELTVTDIEK | Oxidation [M5],RQVIDDIVK,SSSLQSHTSNFLNVLVDANR,TVIDASLVAGFTIR"	"sp|Q9SSS9|ATPD_ARATH ATP synthase subunit delta, chloroplastic OS=Arabidopsis thaliana GN=ATPD PE=1 SV=1"	sp|Q9SSS9|ATPD_ARATH	"1040.518484,1027.628282,1180.6827765,2636.35902,1144.608716,1507.70479733,1523.702324,1970.022586,928.523394,1663.807846,1679.8035195,1084.625432,2188.08665033,1461.814974"	"LTDTQLAEVR,INIVTEIVK,LEAPQLAQIAK"	ATPD	http://www.uniprot.org/uniprot/Q9SSS9	58.119658
80850904	41247228	65516636	36659768	52480000	39560480	55101104	53683008	23143540	57775212	18124740	34933316	sp|Q9SUR6|CORI3_ARATH	Q9SUR6	2	14	8	47038.49	"99.2,99.7,99.7,99.7,99.7,97.7,99.7,99.7,99.7,99.7,99.7,99.7,99.0,99.7"	"ANVLLPSPGFPWDLVR,AVLYGSGNAYAPSLGLAAAK,DKVEFGYSK,HSIDMETPVLEDALER,HSIDMETPVLEDALER | Oxidation [M5],HYNFLPEK,IMVVSDEVFR,LTADDVFMTLGCK | Carbamidomethyl [C12],NEILETSNTAEK,NFEIDFDSVR,QAIELAVDILAKPK,SAVAEYLNQGLPK,TPQEFFDK,TPQEFFDKR"	sp|Q9SUR6|CORI3_ARATH Cystine lyase CORI3 OS=Arabidopsis thaliana GN=CORI3 PE=1 SV=1	"sp|Q9SUR6|CORI3_ARATH,tr|F4JP99|F4JP99_ARATH"	"1779.968068,1892.9989915,1071.523182,1853.8824795,1869.878463,1046.518018,1193.610774,1469.6901125,1347.650946,1240.57222,1507.897335,1388.72953,1010.471611,1166.572182"	"AVLYGSGNAYAPSLGLAAAK,NFEIDFDSVR,HYNFLPEK"	CORI3	http://www.uniprot.org/uniprot/Q9SUR6	35.545024
7.03426e+06	7166188	6.33606e+06	7.87524e+06	7.6001e+06	7754946	7.71241e+06	7086235	6934601	8.35016e+06	5.91439e+06	7.27075e+06	sp|Q9SVN5|SYMC_ARATH	Q9SVN5	1	14	14	89852.616	"96.6,98.7,99.7,97.0,99.7,99.7,95.1,99.7,99.7,94.2,98.7,92.4,99.7,97.5"	"ALEENCTPK | Carbamidomethyl [C6],DEAANLADQLNK,DVPFTTSAGVCK | Carbamidomethyl [C11],EDKPLCAVVIR | Carbamidomethyl [C6],ELENDEVAR,FVAEYVEAMEK,LLNPTELKDPK,LVEGSCPFEGCNYDSAR | Carbamidomethyl [C6 C11],TSTPEQTEVCQAIFNK | Carbamidomethyl [C10],TVVSGLVK,VELVEPPK,VSSISNGTIR,WLSENTMQQLYCDTCK | Carbamidomethyl [C12 C15],YIPLEEMQNR | Oxidation [M7]"	"sp|Q9SVN5|SYMC_ARATH Methionine--tRNA ligase, cytoplasmic OS=Arabidopsis thaliana GN=At4g13780 PE=2 SV=1"	sp|Q9SVN5|SYMC_ARATH	"1060.484644,1300.623532,1280.60653,1298.702037,1073.49906,1314.614842,1266.718095,1959.807084,1851.866352,801.49593,909.516528,1032.557052,2075.87524,1307.617626"	"TVVSGLVK,DVPFTTSAGVCK | Carbamidomethyl [C11],VELVEPPK"	At4g13780	http://www.uniprot.org/uniprot/Q9SVN5	20.075282
33404784	36507548	31708616	31453220	29824496	33876308	31044004	27031040	18728316	34778900	21884488	26839288	sp|Q9ZPF5|ARGI2_ARATH	Q9ZPF5	2	14	10	37979.987	"99.7,99.7,99.7,99.7,99.0,98.7,99.5,97.5,94.0,99.7,96.3,99.7,99.7,99.7"	"DTADDMTAMVAAK,DTADDMTAMVAAK | Oxidation [M6 M9],DTADDMTAMVAAK | Oxidation [M6],EAIWCGSTNSTTEEGK | Carbamidomethyl [C5],EMGVDDDR,EMGVDDDR | Oxidation [M2],FGVEQYEMR | Oxidation [M8],IMEGGYAR,IMEGGYAR | Oxidation [M2],LGGPVDILHLDAHPDIYDR,LVMEEEPLRPLVIGGDHSISYPVVR | Oxidation [M3],SLPTSLVETGQNR,VIDASLTLIR,VLSDVGDIPVQEIR"	"sp|Q9ZPF5|ARGI2_ARATH Arginase 2, mitochondrial OS=Arabidopsis thaliana GN=ARGAH2 PE=2 SV=1"	"sp|P46637|ARGI1_ARATH,sp|Q9ZPF5|ARGI2_ARATH"	"1338.577492,1370.569078,1354.573568,1768.757954,935.365494,951.357664,1173.511792,895.421954,911.416618,2115.0756895,2820.481716,1400.7260985,1099.660116,1538.840024"	"SLPTSLVETGQNR,VLSDVGDIPVQEIR,LGGPVDILHLDAHPDIYDR"	ARGAH2	http://www.uniprot.org/uniprot/Q9ZPF5	39.244186
8688774	10410784	7.73114e+06	5.98468e+06	12559347	7214150	7329289	10036564	4.03345e+06	15909992	4281310	7.20068e+06	sp|Q9ZU23|JAL5_ARATH	Q9ZU23	1	14	14	73938.045	"99.1,99.7,99.7,99.7,99.7,99.7,99.7,99.7,99.7,99.7,99.3,99.7,99.7,99.7"	"AGTNPGANAGGNGGTEK,AQGGSYGETFDDGAFDHVR,ESNTGSESNTNSSPQK,ETNPGASGIGNSDGSTGTSPEGTESNADGTK,IHVAVGGLGIEQIR,LEAQGGNGGNQWDDGTDHDGVMK,NAGGSKPSSGSAGTNPGASAGGNGETEK,SIEVEYDGTSLK,TNPGASAGGNGETVSNIGDTESNAGGSK,TNPGASAGGNGETVSNIGDTESNAGGSK | Deamidated [N10],TNSGNGGTNDGASGIGSNDGSTGTNPGAGGGTDSNIEGTENNVGGK,TSSYFSVAAPK,VQLTFDDVIR,VYVGQGDSGVAYVK"	sp|Q9ZU23|JAL5_ARATH Jacalin-related lectin 5 OS=Arabidopsis thaliana GN=JAL5 PE=2 SV=1	sp|Q9ZU23|JAL5_ARATH	"1471.659804,2027.859966,1665.701958,2894.228614,1460.846217,2400.003219,2446.090005,1339.650418,2548.129528,2549.110521,4122.747212,1156.57713,1204.644976,1440.724658"	"VQLTFDDVIR,SIEVEYDGTSLK,AQGGSYGETFDDGAFDHVR"	JAL5	http://www.uniprot.org/uniprot/Q9ZU23	36.849315
102239664	117065944	100559912	101885392	92408088	103059768	95206864	98997736	101575680	99535320	101684592	95507144	sp|Q9ZUC1|QORL_ARATH	Q9ZUC1	1	14	14	40985.735	"99.7,99.7,99.7,99.7,99.7,99.7,99.7,99.7,99.4,99.7,99.7,99.7,99.7,99.7"	"ATDSPLPTVPGYDVAGVVVK,AWVYSDYGGVDVLK,EGDEVYANVSEK,FVVTSNGDVLK,FVVTSNGDVLKK,KLNPYIESGK,LESNIVVPEIK,LESNIVVPEIKEDQVLIK,LNPYIESGK,QFGSLAEYTAVEEK,SLGADLAIDYTK,VADAFSYLETNHATGK,VVAAALNPVDAK,VVALTGAVTPPGFR"	"sp|Q9ZUC1|QORL_ARATH Quinone oxidoreductase-like protein At1g23740, chloroplastic OS=Arabidopsis thaliana GN=At1g23740 PE=2 SV=2"	sp|Q9ZUC1|QORL_ARATH	"1984.054864,1570.7661085,1338.593464,1177.634202,1305.729025,1147.623472,1239.7069565,2065.167198,1019.528746,1570.751788,1265.64954,1722.822197,1166.665004,1383.786984"	"VVAAALNPVDAK,FVVTSNGDVLK,LESNIVVPEIK"	At1g23740	http://www.uniprot.org/uniprot/Q9ZUC1	39.637306
5.85501e+06	6.22124e+06	6196423	7245235	6.36264e+06	5.91894e+06	6520799	5456927	6396569	5.87851e+06	6162391	6.99685e+06	tr|O65655|O65655_ARATH	O65655	1	14	14	69441.358	"99.4,99.0,99.5,99.6,99.6,96.9,97.3,97.9,99.7,99.7,99.7,99.7,99.7,99.7"	"AQPSEAVLEK,AVQELLGK,DAAVVQVASSEHK,ENNIIDAGDSEK,FQEPSTVVGESHPMDVEEPLEQK,INSATVAAAEK,IYYLPLSEEQVAAK,NQTTPVTPVEAAFSTETTPVTAEK,SDCISTDSVSNNEK | Carbamidomethyl [C3],SDSSVSEDGPK,TGNVTSFWMDHIK,TSVGGGDDSNAANADMIK,TSVGGGDDSNAANADMIK | Oxidation [M16],VPEAQITNSATPTTTPR"	tr|O65655|O65655_ARATH Putative uncharacterized protein AT4g39680 OS=Arabidopsis thaliana GN=At4g39680 PE=1 SV=1	tr|O65655|O65655_ARATH	"1070.56072,856.501214,1339.67229,1303.588614,2611.188108,1073.571506,1622.856189,2518.245432,1554.646312,1106.470986,1534.723851,1721.75225,1737.747398,1782.912168"	"AVQELLGK,INSATVAAAEK,VPEAQITNSATPTTTPR"	At4g39680	http://www.uniprot.org/uniprot/O65655	29.699842
18594084	21829148	18125544	18094548	13496632	17481348	19215544	15152935	18420252	24978124	17233392	16186979	sp|B9DGD6|ACS_ARATH	B9DGD6	1	13	13	81888.094	"99.7,99.7,99.7,99.7,99.7,99.7,99.7,99.7,99.0,99.3,99.7,98.0,99.7"	"AIVDAALDQSSK,DKDGYYWLTGR,EFSGQALVSSPQQYMEMHK,GPISIEWFK,HVESMSQLPSGAGK,IHWAPGLPK,IVDCKPNVILTCNAVK | Carbamidomethyl [C4 C12],KGPISIEWFK,TLFGDHER,VCQLANYLK | Carbamidomethyl [C2],VDDVINVSGHR,VLGSVGEPINPSAWR,WGDQVFSENLDVR"	"sp|B9DGD6|ACS_ARATH Acetyl-coenzyme A synthetase, chloroplastic/glyoxysomal OS=Arabidopsis thaliana GN=ACS PE=1 SV=1"	sp|B9DGD6|ACS_ARATH	"1216.629686,1372.641111,2195.997315,1075.570764,1426.687882,1017.576483,1842.9687295,1203.665607,973.461543,1107.574424,1209.610603,1580.823602,1563.731358"	"VLGSVGEPINPSAWR,VCQLANYLK | Carbamidomethyl [C2],AIVDAALDQSSK"	ACS	http://www.uniprot.org/uniprot/B9DGD6	19.784657
135302880	113125736	100963768	90384664	79849136	90109344	101469952	89789144	97939360	145827504	83314248	79566280	sp|O49006|PME3_ARATH	O49006	1	13	13	64255.147	"99.7,99.7,99.7,99.7,99.7,92.8,99.5,99.7,99.7,99.7,99.7,99.7,99.7"	"ADATVAADGSGTFK,DITFQNTAGPSK,EYSNTGAGAGTANR,GSFPTYLGRPWK,IGATSDLQSVK,NIMFMGDGR,NIMFMGDGR | Oxidation [M5],NVVDGSTTFHSATVAAVGER,TDPNQNTGIVIQK,TLISSAITNQETCLDGFSHDDADK | Carbamidomethyl [C13],TVAAAVAAAPENSNK,TVAAAVAAAPENSNKR,VITAAAEAQK"	sp|O49006|PME3_ARATH Pectinesterase/pectinesterase inhibitor 3 OS=Arabidopsis thaliana GN=PME3 PE=2 SV=2	sp|O49006|PME3_ARATH	"1309.61419933,1277.624762,1367.60447,1407.730746,1117.597474,1039.458168,1055.452493,2016.987762,1426.7404845,2637.1854285,1412.725597,1568.826314,1000.555224"	"IGATSDLQSVK,TDPNQNTGIVIQK,DITFQNTAGPSK"	PME3	http://www.uniprot.org/uniprot/O49006	26.182432
46325044	45039468	38270020	38673280	37569228	37292460	46621024	37053224	39638320	35674876	37840344	37057364	sp|O49485|SERA1_ARATH	O49485	3	13	9	63324.212	"99.0,99.7,99.7,99.7,99.7,99.7,99.7,99.7,99.7,99.7,99.7,99.7,99.7"	"ATDDLDTR,EVFESSHGR,FASSLSESGEVK,GGVIDEDALVR,ILNDETFAK,ISLCDALIVR | Carbamidomethyl [C4],LAVQLVAGGSGVK,LLEDVANVDCSYNMTPEELNIK | Carbamidomethyl [C10] Oxidation [M14],NVAQADASVK,QAIMAIGVDDIPSK | Oxidation [M4],TLAVLGFGK,VIAHDPYAPADR,YVGVSLVGK"	"sp|O49485|SERA1_ARATH D-3-phosphoglycerate dehydrogenase 1, chloroplastic OS=Arabidopsis thaliana GN=PGDH1 PE=1 SV=1"	"sp|O49485|SERA1_ARATH,sp|Q9LT69|SERA3_ARATH,sp|O04130|SERA2_ARATH"	"905.40818,1046.477745,1239.598168,1142.592614,1049.53919,1158.642692,1197.707685,2582.1894795,1001.51362,1472.755686,904.538444,1323.657018,920.532592"	"ILNDETFAK,LAVQLVAGGSGVK,VIAHDPYAPADR"	PGDH1	http://www.uniprot.org/uniprot/O49485	24.543947
44140340	40139436	36380668	43260012	39101600	42437908	37555412	34773180	40199420	30471468	35957444	35017088	sp|O49562|PDRP1_ARATH	O49562	1	13	13	43683.057	"99.7,99.7,99.7,99.0,99.7,99.7,99.7,99.7,99.5,97.2,99.7,99.6,99.0"	"GCPVNTHLFSGIEDGEK | Carbamidomethyl [C2],GITNSSLNEDYFK,HDDGALPENLEK,IEAIEFTIK,IFAENPTWPVIEVTESAIEETAAVVLR,LDSTITNGSNNTTGPMRPIESSSR,SLGLGSSFK,TDVSTLDSDVSSSSNGVSEADMTAAK,TDVSTLDSDVSSSSNGVSEADMTAAK | Oxidation [M22],TLFEIDPR,TPLSTYLAQK,VSNVPIVNGVDLPK,YSELGSVK"	"sp|O49562|PDRP1_ARATH Pyruvate, phosphate dikinase regulatory protein 1, chloroplastic OS=Arabidopsis thaliana GN=RP1 PE=1 SV=1"	sp|O49562|PDRP1_ARATH	"1858.853021,1486.694068,1336.625705,1062.596748,2983.553082,2534.200629,894.480836,2573.1306895,2589.127846,989.518264,1120.611672,1449.818088,881.448876"	"TPLSTYLAQK,SLGLGSSFK,VSNVPIVNGVDLPK"	RP1	http://www.uniprot.org/uniprot/O49562	43.920596
9262373	14690397	11142353	12359551	10473516	9962863	12408264	10884471	13278701	10134729	20344236	11239937	sp|O65258|BAM2_ARATH	O65258	1	13	13	61397.323	"95.7,99.7,99.7,97.3,99.3,99.7,99.7,93.5,99.7,99.7,99.7,99.7,99.0"	"DGYGPIAAMFK | Oxidation [M9],EIGQSNPDIYFTDSAGR,GPDNTETYNSTPHGTGFFR,GPDNTETYNSTPHGTGFFR | Deamidated [N4],HDAALNFTCVELR | Carbamidomethyl [C9],ILENAKPLTDPDGR,LNPTLMESQNFK | Oxidation [M6],LSGIHWWYK,MHGEAVPDLGLAPGTQETNPE,MHGEAVPDLGLAPGTQETNPE | Oxidation [M1],NTECLTWGIDK | Carbamidomethyl [C4],VEFDEFFEEK,VLIDHGDR"	"sp|O65258|BAM2_ARATH Beta-amylase 2, chloroplastic OS=Arabidopsis thaliana GN=BAM2 PE=1 SV=2"	sp|O65258|BAM2_ARATH	"1184.552788,1868.855248,2096.918349,2097.919698,1544.740246,1537.8099185,1436.69642,1188.608511,2161.999716,2177.991579,1335.612628,1317.575604,923.482059"	"NTECLTWGIDK | Carbamidomethyl [C4],VEFDEFFEEK,LNPTLMESQNFK | Oxidation [M6]"	BAM2	http://www.uniprot.org/uniprot/O65258	26.752768
408280224	399335264	425130592	470465792	401118944	425563200	401776288	281715680	414090240	289307424	443183264	427184992	sp|O65282|CH10C_ARATH	O65282	1	13	13	26801.533	"99.2,99.1,99.2,99.1,99.7,99.7,99.7,99.7,99.7,99.7,99.7,99.7,99.7"	"ASDVMAILS,ASDVMAILS | Oxidation [M5],DGSNYIALR,EDDIVGILETEDIK,EKPSIGTVIAVGPGSLDEEGK,IDITVPTGAQIIYSK,ITPLPVSTGSTVLYSK,NKIDITVPTGAQIIYSK,TAGGLLLTETTK,TLGGILLPSTAQSKPQGGEVVAVGEGR,YAGTEVEFNDVK,YAGTEVEFNDVK | Deamidated [N9],YTSIKPLGDR"	"sp|O65282|CH10C_ARATH 20 kDa chaperonin, chloroplastic OS=Arabidopsis thaliana GN=CPN21 PE=1 SV=2"	sp|O65282|CH10C_ARATH	"905.452994,921.447986,1007.50421,1587.787228,2082.084243,1617.8969845,1661.924374,1860.035625,1203.671416,2620.417393,1370.63544,1371.616389,1148.618599"	"ITPLPVSTGSTVLYSK,YAGTEVEFNDVK,DGSNYIALR"	CPN21	http://www.uniprot.org/uniprot/O65282	58.102767
42255392	32694180	38807416	38314452	34624680	37074680	31436484	28128156	34255316	39301516	40317840	31765212	sp|O81852|AKH2_ARATH	O81852	2	13	12	100248.638	"99.7,99.7,99.7,99.3,99.6,98.0,99.7,99.7,99.7,92.9,99.7,99.0,99.7"	"ANSGPLDQYLK,DVLIVNPTSSNQVDPDFGESEK,FGGTCVGNSQR | Carbamidomethyl [C5] Deamidated [Q10],FSEALQAGR,GCTSVEEFMEK | Carbamidomethyl [C2],LASYLGAPS,LDAENSGEVLR,LDLADLPIR,SFSEVVTEAK,SLVPEPLK,YKDHPLIVR,YNIPIVIR,YVGVVDAVNQK"	"sp|O81852|AKH2_ARATH Bifunctional aspartokinase/homoserine dehydrogenase 2, chloroplastic OS=Arabidopsis thaliana GN=AKHSDH2 PE=1 SV=1"	"sp|O81852|AKH2_ARATH,sp|Q9SA18|AKH1_ARATH"	"1204.609014,2389.132106,1182.508584,977.493366,1315.541422,877.454715,1201.597412,1024.592494,1095.544678,881.522152,1139.64585,986.591428,1190.628836"	"LDAENSGEVLR,YVGVVDAVNQK,YNIPIVIR"	AKHSDH2	http://www.uniprot.org/uniprot/O81852	15.174672
4284930560	4766118912	4930850304	4860588544	4363026944	5030034944	4820389888	4597653504	4591117312	4924515328	4696794112	5400928768	sp|P10797|RBS2B_ARATH	P10797	5	13	0	20350.101	"99.4,99.7,99.7,99.0,99.7,99.0,99.7,99.7,99.7,99.7,99.7,99.7,99.7"	"ANNDITSITSNGGR,EHGNTPGYYDGR,EHGNTPGYYDGR | Deamidated [N4],EYPGAFIR,FETLSYLPDLSDVELAK,IIGFDNTR,KEYPGAFIR,KFETLSYLPDLSDVELAK,KKFETLSYLPDLSDVELAK,LPLFGCTDSAQVLK | Carbamidomethyl [C6],LPLFGCTDSAQVLK | Carbamidomethyl [C6] Deamidated [Q11],QVQCISFIAYKPPSFTEA | Carbamidomethyl [C4],WIPCVEFELEHGFVYR | Carbamidomethyl [C4]"	"sp|P10797|RBS2B_ARATH Ribulose bisphosphate carboxylase small chain 2B, chloroplastic OS=Arabidopsis thaliana GN=RBCS-2B PE=2 SV=2"	"sp|P10795|RBS1A_ARATH,sp|P10796|RBS1B_ARATH,sp|P10797|RBS2B_ARATH,tr|B3H5S2|B3H5S2_ARATH,sp|P10798|RBS3B_ARATH"	"1418.675566,1364.575543,1365.558132,951.483626,1938.979272,934.485049143,1079.5762095,2067.0772275,2195.17086,1547.80210117,1548.78263,2085.023031,2079.986967"	"LPLFGCTDSAQVLK | Carbamidomethyl [C6],IIGFDNTR,EHGNTPGYYDGR"	RBCS	http://www.uniprot.org/uniprot/P10797	60.773481
14762045	12584328	11171474	18149412	17684396	17519672	15794923	11510371	15635575	9273966	12854957	13804779	sp|P29976|AROF_ARATH	P29976	3	13	11	57978.155	"99.7,99.7,99.7,99.7,99.6,99.7,94.3,99.0,99.7,93.4,99.7,96.4,99.7"	"AFATGGYAAIQR,AFDSILAEVR,AFLLQGGDCAESFK | Carbamidomethyl [C9],AYTQSAATLNLLR,ESVASSSSGALK,GDNINGDTFDEK,GIANPLGIK,LADAAVGK,LVEILNPNNKPGR,MDPFELVK,QLDGAHVEFLR,SGQIVTWVCDPMHGNTIK | Carbamidomethyl [C9],VTQWNLDFVEQSEQADR"	"sp|P29976|AROF_ARATH Phospho-2-dehydro-3-deoxyheptonate aldolase 1, chloroplastic OS=Arabidopsis thaliana GN=DHS1 PE=2 SV=2"	"sp|Q00218|AROG_ARATH,sp|P29976|AROF_ARATH,tr|Q9SK84|Q9SK84_ARATH"	"1224.625378,1119.592356,1541.717742,1420.767226,1121.557038,1323.557278,881.53363,743.417052,1462.8264805,977.489082,1283.662164,2041.971096,2063.955504"	"AFDSILAEVR,LVEILNPNNKPGR,MDPFELVK"	DHS1	http://www.uniprot.org/uniprot/P29976	29.904762
34549848	40107712	34181508	33910572	32622184	34309548	36087584	36113840	35351912	39330380	32800580	35001392	sp|P46643|AAT1_ARATH	P46643	1	13	13	47757.172	"99.7,99.7,99.7,99.7,99.7,99.7,98.9,99.3,99.7,99.7,98.9,99.7,99.7"	"DDNGKPVVLECVR | Carbamidomethyl [C11],IAAVQTLSGTGACR | Carbamidomethyl [C13],IFLEDGHHIGISQSYAK,LAGSTFMEYLPMGGSAK | Oxidation [M12],LAGSTFMEYLPMGGSAK | Oxidation [M7 M12],LAYGDNSEFIK,LTSEYHIYMTR,LTSEYHIYMTR | Oxidation [M9],QIGMFCYSGLTPEQVDR | Carbamidomethyl [C6],QIGMFCYSGLTPEQVDR | Carbamidomethyl [C6] Oxidation [M4],TYHYYHPETK,VGCLSVLCEDPK | Carbamidomethyl [C3 C8],VNVGVGAYR"	"sp|P46643|AAT1_ARATH Aspartate aminotransferase, mitochondrial OS=Arabidopsis thaliana GN=ASP1 PE=1 SV=1"	sp|P46643|AAT1_ARATH	"1499.7407065,1403.718162,1913.964224,1774.826641,1790.822134,1255.60736,1412.675538,1428.670514,1999.911858,2015.909178,1337.603487,1375.647252,933.503204"	"VGCLSVLCEDPK | Carbamidomethyl [C3 C8],LAYGDNSEFIK,VNVGVGAYR"	ASP1	http://www.uniprot.org/uniprot/P46643	30.465116
72724160	69318768	74873528	73073088	59346896	70328960	75936840	54862140	70052912	62935116	76050000	78743072	sp|P47999|CYSKP_ARATH	P47999	4	13	11	41655.654	"99.7,99.6,99.7,99.7,99.7,99.7,99.7,99.3,99.7,99.7,99.7,99.7,99.7"	"AFGAELVLTEPAK,GCVASVAAK | Carbamidomethyl [C2],IGYSMITDAEEK | Oxidation [M5],IHYETTGPEIWEDTR,IQGIGAGFVPK,LEIMEPCCSVK | Carbamidomethyl [C7 C8],LEIMEPCCSVK | Carbamidomethyl [C7 C8] Oxidation [M4],LILTMPASMSLER | Oxidation [M5 M9],TPMVYLNNVVK,TPNSYMLQQFDNPANPK,TPNSYMLQQFDNPANPK | Oxidation [M6],VIGVEPTESAILSGGKPGPHK,YLSTQLFQSIR"	"sp|P47999|CYSKP_ARATH Cysteine synthase, chloroplastic/chromoplastic OS=Arabidopsis thaliana GN=OASB PE=1 SV=2"	"sp|Q43725|CYSKM_ARATH,tr|B9DFR6|B9DFR6_ARATH,tr|F4J9F7|F4J9F7_ARATH,sp|P47999|CYSKP_ARATH"	"1344.728558,861.437528,1371.62240733,1845.8533075,1085.623263,1364.613726,1380.60806,1492.762382,1276.682876,1963.9109555,1979.903715,2072.127134,1354.724016"	"IQGIGAGFVPK,VIGVEPTESAILSGGKPGPHK,IHYETTGPEIWEDTR"	OASB	http://www.uniprot.org/uniprot/P47999	36.734694
137042416	128541768	126798912	156867504	152616144	144836336	140587200	132135992	140336720	132353384	188687728	152203936	sp|P49204|RS42_ARATH	P49204	3	13	0	29873.572	"99.4,99.2,99.7,99.7,99.7,99.5,99.7,99.7,99.7,99.7,99.0,99.7,99.7"	"ECLPLVLIIR | Carbamidomethyl [C2],EVISILMQR,EVISILMQR | Oxidation [M7],FDVGNVVMVTGGR,FDVGNVVMVTGGR | Oxidation [M8],GIPYLNTYDGR,GSFETIHIQDSTGHEFATR,GTKPWVSLPK,LGNVYTIGK,LHSIKDEEAK,LTIIEEAR,TYPAGFMDVVSIPK | Oxidation [M7],YPDPLIKPNDTIK"	sp|P49204|RS42_ARATH 40S ribosomal protein S4-2 OS=Arabidopsis thaliana GN=RPS4B PE=2 SV=4	"sp|P49204|RS42_ARATH,sp|Q8VYK6|RS43_ARATH,sp|Q93VH9|RS41_ARATH"	"1224.727638,1087.606422,1103.60131,1349.674722,1365.67005,1267.617718,2131.9935225,1111.638773,963.539576,1168.6069215,943.533772,1539.764674,1512.818636"	"LGNVYTIGK,GIPYLNTYDGR,GTKPWVSLPK"	RPS4B	http://www.uniprot.org/uniprot/P49204	48.091603
2.7896e+06	2877519	1.70911e+06	3.46198e+06	2.8322e+06	2335847	1.95872e+06	2842911	2.26964e+06	3264024	2.28457e+06	3203558	sp|P54887|P5CS1_ARATH	P54887	4	13	2	77700.907	"93.6,99.7,99.0,99.7,99.7,99.0,99.7,99.7,99.7,99.7,99.7,99.2,99.7"	"EEIPDLLK,HQDEITFGDK,ILNIPEAR,IPVLGHADGICHVYVDK | Carbamidomethyl [C11],KTEVADGLVLEK,LIGLVTSR,QLVNSSFADLQKPQTELDGK,QVDSAAVFHNASTR,SFNHEYCAK | Carbamidomethyl [C7],VGTAVVTGK,VGTLFHQDAR,VIPIFNENDAISTR,VITDAIPETVGGK"	sp|P54887|P5CS1_ARATH Delta-1-pyrroline-5-carboxylate synthase A OS=Arabidopsis thaliana GN=P5CSA PE=1 SV=1	"sp|P54887|P5CS1_ARATH,tr|B9DFG0|B9DFG0_ARATH,sp|P54888|P5CS2_ARATH,tr|F4IFZ9|F4IFZ9_ARATH"	"955.522956,1188.540802,924.538878,1891.9608925,1300.72421,857.533228,2217.1296035,1501.726715,1154.4810365,830.485936,1142.5827055,1587.824188,1298.706064"	"VGTLFHQDAR,KTEVADGLVLEK"	P5CSA	http://www.uniprot.org/uniprot/P54887	21.199442
442696288	443184096	470029248	469580032	417908288	482558176	504333536	522315424	489790496	520828160	494772352	494970912	sp|P56759|ATPF_ARATH	P56759	1	13	13	21056.655	"99.7,99.7,99.7,99.1,99.7,99.0,99.7,99.7,99.7,99.7,99.7,99.7,99.7"	"EGAIQQLENAR,EKLNLINSTYK,GVLNDLLDNR,LNLINSTYK | Deamidated [N5],NETILFEQQR,NVETEADK,NVETEADKFR,TINANIGMFGTMK,TINANIGMFGTMK | Oxidation [M12],TINANIGMFGTMK | Oxidation [M8 M12],TINANIGMFGTMK | Oxidation [M8],VNGYSEIER,VNGYSEIER | Deamidated [N2]"	"sp|P56759|ATPF_ARATH ATP synthase subunit b, chloroplastic OS=Arabidopsis thaliana GN=atpF PE=3 SV=1"	sp|P56759|ATPF_ARATH	"1227.618343,1321.7244975,1127.593642,1065.571062,1276.640968,904.41327,1207.583077,1396.6857175,1412.6789255,1428.674,1412.67758,1065.509106,1066.492927"	"NETILFEQQR,EGAIQQLENAR,VNGYSEIER"	atpF	http://www.uniprot.org/uniprot/P56759	40.217391
97775712	106703064	103188336	122701792	106201472	112570112	111115200	81924248	111204624	93289120	119365792	118872544	sp|P60040|RL72_ARATH	P60040	2	13	6	28170.693	"99.0,99.0,99.6,99.4,99.7,99.7,99.7,99.5,98.8,99.7,99.4,99.4,99.7"	"EEEWALEK,EKELISLK,ENFINELIR,GGFYVDPEAK,IALTDNSIVEQALGK,NHYVEGGDAGNR,NHYVEGGDAGNR | Deamidated [N1],QIFNGVFLK,QIFNGVFLK | Deamidated [N4],RVEPYVTYGFPNLK,VEPYVTYGFPNLK,VVVPESVLK,VVVPESVLKK"	sp|P60040|RL72_ARATH 60S ribosomal protein L7-2 OS=Arabidopsis thaliana GN=RPL7B PE=2 SV=1	"sp|P60040|RL72_ARATH,tr|F4IT48|F4IT48_ARATH"	"1032.47668,958.570212,1146.603168,1081.50817,1570.8561345,1287.55648,1288.5424215,1064.60166,1065.586336,1681.882722,1525.779988,968.59085,1096.685238"	"ENFINELIR,VEPYVTYGFPNLK,IALTDNSIVEQALGK"	RPL7B	http://www.uniprot.org/uniprot/P60040	39.256198
90557256	66204348	83619368	82161520	83339560	78080816	85831048	71805928	86988240	78360104	87596400	85781392	sp|P93014|RR5_ARATH	P93014	1	13	13	32644.739	"98.9,99.7,97.4,99.0,99.3,99.7,99.7,99.7,99.7,99.7,99.3,99.7,99.7"	"AIVVVGDK,ATLAAVQQMR | Oxidation [M9],DIYVMDSK,EVVAAVQK,GIPMEELWK,IVLEMAGVENALGK,IVLEMAGVENALGK | Oxidation [M5],NIVQVPMTK,QGNVGVGCAK | Carbamidomethyl [C8],QLGSNNALNNAR,SEGDYGAAK,VMLRPASPGTGVIAGGAVR,VMLRPASPGTGVIAGGAVR | Oxidation [M2]"	"sp|P93014|RR5_ARATH 30S ribosomal protein S5, chloroplastic OS=Arabidopsis thaliana GN=rps5 PE=2 SV=1"	sp|P93014|RR5_ARATH	"799.48029,1103.576234,969.44777,842.485914,1101.553536,1442.7796525,1458.773778,1028.56876,988.475504,1270.637573,896.385292,1808.008527,1824.002994"	"QLGSNNALNNAR,EVVAAVQK,AIVVVGDK"	rps5	http://www.uniprot.org/uniprot/P93014	38.283828
149838800	150164656	161481680	169183904	138622368	144146944	167943680	122852848	165100656	149364528	196951568	177215872	sp|Q08682|RSSA1_ARATH	Q08682	2	13	0	32291.083	"99.7,99.7,99.3,99.7,99.7,99.7,99.0,99.7,99.7,99.7,99.0,99.7,97.4"	"EGALGNIPIIAFCDTDSPMR | Carbamidomethyl [C13],FAQYTGANAIAGR,FAQYTGANAIAGR | Deamidated [N8],FVDIGIPANNK,HTPGTFTNQMQTSFSEPR,HTPGTFTNQMQTSFSEPR | Oxidation [M10],LLILTDPR,MMCAAEVHLGTK | Carbamidomethyl [C3],MMCAAEVHLGTK | Carbamidomethyl [C3] Oxidation [M1 M2],MMCAAEVHLGTK | Carbamidomethyl [C3] Oxidation [M2],NCNYQMER | Carbamidomethyl [C2],NDGIYIFNLGK,RNDGIYIFNLGK"	sp|Q08682|RSSA1_ARATH 40S ribosomal protein Sa-1 OS=Arabidopsis thaliana GN=RPSaA PE=1 SV=3	"tr|B9DG17|B9DG17_ARATH,sp|Q08682|RSSA1_ARATH"	"2176.027128,1338.6679645,1339.652158,1186.6356215,2064.93264,2080.926318,939.575906,1346.61336375,1378.603677,1362.609132,1113.433118,1252.644822,1408.74341"	"FVDIGIPANNK,FAQYTGANAIAGR,HTPGTFTNQMQTSFSEPR"	RPSaA	http://www.uniprot.org/uniprot/Q08682	34.228188
8026681	7745551	7338163	7373503	6.4062e+06	7143422	8405281	6567994	7968671	8044524	9409973	8378254	sp|Q0WL80|UGGG_ARATH	Q0WL80	1	13	13	181802.437	"99.6,99.5,97.9,99.0,99.7,99.6,99.5,99.7,99.7,98.1,97.6,99.7,99.7"	"AFFANMPLSK,EGSWNSNFLK,FVSLASSTR,GITLEDPR,LASLLQVLQK,LLLTTPLPEPDSYR,LLSESGLSR,LLVPSDGDDAVQQNK,SCLVESVDEELLK | Carbamidomethyl [C2],SSELYALK,TEDLSQDVR,TIENNGGQIPSSDAVTNAQVK,YVTHLLAADVATK"	sp|Q0WL80|UGGG_ARATH UDP-glucose:glycoprotein glucosyltransferase OS=Arabidopsis thaliana GN=UGGT PE=1 SV=1	sp|Q0WL80|UGGG_ARATH	"1124.568282,1180.550342,966.514494,899.47124,1111.69657,1613.864938,960.52415,1597.794508,1519.744464,909.480272,1061.498672,2142.0558905,1400.7680455"	"FVSLASSTR,LLSESGLSR,LLVPSDGDDAVQQNK"	UGGT	http://www.uniprot.org/uniprot/Q0WL80	9.237446
26355104	26481500	24691816	22811208	21846948	19567864	29572664	15606710	25367124	16585440	30963572	24242004	sp|Q38884|EIF3I_ARATH	Q38884	3	13	8	36387.666	"99.7,99.7,99.7,99.7,99.7,99.7,99.7,99.7,99.0,99.7,99.7,99.7,99.7"	"AADDSHFLTGSLDK,AVWGPLNQTIVSGGEDK,DHTPTLWFADNGER,EGDLLFSCAK | Carbamidomethyl [C8],GHFGPINALAFNPDGK,GHNGAVWCCDVSR | Carbamidomethyl [C8 C9],IAEDPEEQDAESVLVLHCPDGK | Carbamidomethyl [C18],ILQEEIGGVK,IWDAETGK,LAVITTDHFVDR,LHHFDSDYFNIK,LITGSADQTAK,SFSSGGEDGYVR"	sp|Q38884|EIF3I_ARATH Eukaryotic translation initiation factor 3 subunit I OS=Arabidopsis thaliana GN=TIF3I1 PE=2 SV=2	"tr|F4II66|F4II66_ARATH,sp|Q38884|EIF3I_ARATH,tr|F4II65|F4II65_ARATH"	"1475.689725,1769.894848,1657.749105,1138.532856,1653.827325,1516.630794,2450.126562,1084.612864,918.44418,1385.730066,1534.720653,1103.582412,1259.541658"	"ILQEEIGGVK,AVWGPLNQTIVSGGEDK,EGDLLFSCAK | Carbamidomethyl [C8]"	TIF3I1	http://www.uniprot.org/uniprot/Q38884	52.134146
25399608	26303360	28903692	36051312	32332776	36147812	25708352	24434052	26775504	31117108	23464476	33454492	sp|Q38931|FKB62_ARATH	Q38931	3	13	0	61452.169	"99.0,99.7,99.7,99.7,99.3,93.5,99.0,99.6,99.7,99.6,99.7,99.5,99.7"	"DLDEVLVK,EGDGYERPNEGAVVK,EGEGYETPENGDEVEVHYTGTLLDGTK,FIEYDTSFSEEEKK,FTLGQGQVIK,GHGENEEPFEFK,LQDGTVFLK,SDGVEFTVK,TDEEQVVDGLDR,TVSEVTDDNK,VACNLNDAACK | Carbamidomethyl [C3 C10],VLELESTNVK,VLLTVKPQYGFGEK"	sp|Q38931|FKB62_ARATH Peptidyl-prolyl cis-trans isomerase FKBP62 OS=Arabidopsis thaliana GN=FKBP62 PE=1 SV=2	"tr|B3H746|B3H746_ARATH,sp|Q38931|FKB62_ARATH,sp|Q9FJL3|FKB65_ARATH"	"929.506786,1618.758648,2938.299753,1750.794078,1089.617798,1418.610572,1019.565084,980.481882,1374.625046,1106.508238,1234.542742,1130.618186,1577.8807755"	"LQDGTVFLK,VLLTVKPQYGFGEK,VLELESTNVK"	FKBP62	http://www.uniprot.org/uniprot/Q38931	29.219601
100682792	115515808	100774440	113681528	98648344	108325576	110177632	112804936	103866800	86946632	86272216	122514624	sp|Q39258|VATE1_ARATH	Q39258	2	13	5	26059.694	"94.5,99.5,99.0,99.7,99.7,99.7,99.7,99.0,99.0,99.7,99.7,99.7,99.7"	"DLIVQCLLR | Carbamidomethyl [C6],IDYSMQLNASR | Oxidation [M5],IFLPPPPK,IVCENTLDAR | Carbamidomethyl [C3],KIDYSMQLNASR,KIDYSMQLNASR | Oxidation [M6],LKEPSVLLR,LQLVEAEK,SLFGQVTA,SNDPHGLHCSGGVVLASR | Carbamidomethyl [C9],VHAPEVAVDTK,VLQAQDDIVNAMK,VLQAQDDIVNAMK | Oxidation [M12]"	sp|Q39258|VATE1_ARATH V-type proton ATPase subunit E1 OS=Arabidopsis thaliana GN=VHA-E1 PE=1 SV=2	"sp|Q39258|VATE1_ARATH,sp|P0CAN7|VATE3_ARATH"	"1128.638338,1312.608774,907.553114,1189.575648,1424.7073235,1440.7030145,1053.654703,928.52299,821.428276,1861.884755,1164.6138605,1443.73807,1459.733548"	"IFLPPPPK,LKEPSVLLR,SLFGQVTA"	VHA	http://www.uniprot.org/uniprot/Q39258	46.086957
31788304	27267944	33206152	29143892	28658328	27996008	27362624	28058780	28588920	34053012	23958904	23827916	sp|Q42560|ACO1_ARATH	Q42560	1	13	13	98150.926	"99.7,99.7,99.7,99.7,99.7,99.7,99.0,99.0,99.7,99.7,99.5,99.6,99.0"	"ACDLGLEVKPWIK | Carbamidomethyl [C2],ADWHSCLDNR | Carbamidomethyl [C6],AVEFNFNGTTAQLR,DAMNNLGGDSNK | Oxidation [M3],EVAEVVQSSVLPDMFK | Oxidation [M14],FVEFHGEGMR | Oxidation [M9],GPMLLGVK,GPMLLGVK | Oxidation [M3],ILDWENTSPK,LSVFDAAMK,MFVDYSEPESK,MFVDYSEPESK | Oxidation [M1],NCDEFQVK | Carbamidomethyl [C2]"	sp|Q42560|ACO1_ARATH Aconitate hydratase 1 OS=Arabidopsis thaliana GN=ACO1 PE=1 SV=2	sp|Q42560|ACO1_ARATH	"1527.812124,1272.530643,1566.778542,1250.517202,1792.89307767,1223.538555,813.4782,829.473284,1201.596966,980.499916,1330.575233,1346.569624,1038.444358"	"ILDWENTSPK,MFVDYSEPESK,NCDEFQVK | Carbamidomethyl [C2]"	ACO1	http://www.uniprot.org/uniprot/Q42560	13.474388
50591336	57553996	52199040	51253920	57300832	53251392	52391548	59292628	55317700	71047872	45447992	50383740	sp|Q42593|APXT_ARATH	Q42593	4	13	10	46091.715	"99.7,99.0,99.7,99.7,99.7,99.7,95.2,92.1,99.7,99.7,99.5,99.3,99.7"	"EIVALSGAHTLGR,FCHPILVR | Carbamidomethyl [C2],FDPPEGIVIENVPEK,HAANAGLLNALK,LGWHDAGTYNK,LPDAGPPSPADHLR,MGLDDKEIVALSGAHTLGR,NIEEWPLR,SGWGKPETK,TGPGEAGGQSWTVK,VDVVAPEQCPEEGR | Carbamidomethyl [C9],VDVVAPEQCPEEGRLPDAGPPSPADHLR | Carbamidomethyl [C9],YAEDVAAFFK"	"sp|Q42593|APXT_ARATH L-ascorbate peroxidase T, chloroplastic OS=Arabidopsis thaliana GN=APXT PE=2 SV=2"	"sp|Q42593|APXT_ARATH,tr|F4JFY5|F4JFY5_ARATH,sp|Q42592|APXS_ARATH,tr|F4JFY4|F4JFY4_ARATH"	"1322.730398,1040.55918,1681.855443,1191.672184,1260.588987,1441.731915,1982.02496,1055.539658,988.497066,1373.657516,1583.724998,3007.447088,1159.554042"	"TGPGEAGGQSWTVK,YAEDVAAFFK,NIEEWPLR"	APXT	http://www.uniprot.org/uniprot/Q42593	31.455399
37977856	41785696	47878820	40506540	34322672	40008140	44883168	36691956	42853992	40722592	36893348	38135652	sp|Q56YU0|AL2C4_ARATH	Q56YU0	1	13	13	54359.665	"99.7,96.9,99.7,92.3,99.0,99.7,99.5,99.7,99.3,99.0,97.9,99.7,99.7"	"ESGMDALDNYLQTK,GEICVASSR | Carbamidomethyl [C4],ILSYIEHGK,IMQAAAASNLK | Oxidation [M2],LDAVDGGK,LFINGQFIDAASGK,NEGATLLTGGK,QSLFGYTLK,SPLLIFNDADIDK,TFETIDPR,VSFTGSTDVGR,YADIPATAGHFR,YAFDHGPWPR"	sp|Q56YU0|AL2C4_ARATH Aldehyde dehydrogenase family 2 member C4 OS=Arabidopsis thaliana GN=ALDH2C4 PE=1 SV=2	sp|Q56YU0|AL2C4_ARATH	"1583.712606,977.459544,1058.575926,1132.586882,773.391182,1479.771486,1059.556028,1055.565486,1459.754494,977.48128,1124.545894,1317.6455765,1244.572503"	"SPLLIFNDADIDK,LFINGQFIDAASGK,NEGATLLTGGK"	ALDH2C4	http://www.uniprot.org/uniprot/Q56YU0	27.744511
6.98526e+06	6.78743e+06	6554182	7748792	5.9868e+06	6525189	6924162	4920244	7.39404e+06	5.83427e+06	7.27979e+06	6.81484e+06	sp|Q76E23|IF4G_ARATH	Q76E23	2	13	0	187919.067	"99.7,99.7,99.7,99.7,97.7,99.7,99.7,99.7,99.0,99.7,99.7,99.7,99.0"	"ADAAGTTSDLYMAYK,AQNEVDGATDVCPVSEK | Carbamidomethyl [C12],GAGAPGSAPAPSTYPDNSSLSSNR,GSSDEVSDNCINTEK | Carbamidomethyl [C10],INETPNTAK,LETADNSVNAK,NQGSLPAGYGGNVGFRPGQGGNSGVLR,QVLQGPSATVNSPR,SSVETAPVTTTEIR,TLEDAVNDAPK,VAEEGQVEQTEEER,VSTTSDAPTSDSVDTSIDK,VVTLTEIGR"	sp|Q76E23|IF4G_ARATH Eukaryotic translation initiation factor 4G OS=Arabidopsis thaliana GN=EIF4G PE=1 SV=2	"sp|Q76E23|IF4G_ARATH,tr|A8MR97|A8MR97_ARATH"	"1576.709128,1817.81019,2260.036923,1653.679358,986.501514,1160.56886,2615.295636,1452.768034,1489.762928,1171.571646,1631.727256,1924.876132,986.575836"	"VVTLTEIGR,TLEDAVNDAPK,QVLQGPSATVNSPR"	EIF4G	http://www.uniprot.org/uniprot/Q76E23	11.522872
14516253	15323779	14913888	14693976	13866322	14058310	15068137	12815301	14233798	13465452	13731746	15187266	sp|Q84W65|SUFE1_ARATH	Q84W65	1	13	13	40833.025	"99.7,99.5,99.7,99.0,99.7,99.7,99.7,99.6,99.4,99.7,99.7,99.7,98.9"	"DEANVPEVDLESKPDLVEDLGTEK,ELDPVELEVEDVSYQHAGHAAVR,GEEDSSSGESSESSFVSIPETK,GLAALLVK,GSAGDDGETHFNLR,IDDSESGSNVVALGSR,IVSDAFQGK,LFQSVQEPK,NLTPLDSQFK,NNGLLNMLK,NVVYEADSDSVLTK,SGLHALSIVAK,VEGCVSQVWVR | Carbamidomethyl [C4]"	"sp|Q84W65|SUFE1_ARATH SufE-like protein 1, chloroplastic/mitochondrial OS=Arabidopsis thaliana GN=SUFE1 PE=1 SV=2"	sp|Q84W65|SUFE1_ARATH	"2640.265971,2562.234296,2273.970624,783.52159,1474.643832,1604.765026,963.502248,1074.571666,1161.6035,1015.548868,1538.744378,1094.644785,1317.649432"	"IVSDAFQGK,NLTPLDSQFK,GSAGDDGETHFNLR"	SUFE1	http://www.uniprot.org/uniprot/Q84W65	48.51752
8781293	9494554	10192795	10609458	9333397	10300454	11085387	8636626	11799260	9678628	8810275	10345392	sp|Q8GYA4|CRK10_ARATH	Q8GYA4	8	13	8	74282.433	"99.7,99.7,99.3,99.7,99.7,95.6,99.7,99.6,96.5,99.1,99.7,99.6,93.8"	"ASNILLDADMNPK,ASNILLDADMNPK | Oxidation [M10],EATLYYDECVLR | Carbamidomethyl [C9],GILYLHQDSR,GTLSDGTEVAVK,IADFGMAR,IFGLDQTEENTSR,IGQGGFGEVYK,IINPSCTSR | Carbamidomethyl [C6],QPGLFFQSR,TIQTATDDFVESNK,TLLASLSSR,VTGLFNCR | Carbamidomethyl [C7]"	sp|Q8GYA4|CRK10_ARATH Cysteine-rich receptor-like protein kinase 10 OS=Arabidopsis thaliana GN=CRK10 PE=1 SV=3	"sp|Q8W4G6|CRK15_ARATH,sp|Q8H199|CRK14_ARATH,sp|Q9C5S9|CRK6_ARATH,sp|O65468|CRK8_ARATH,sp|Q8GYA4|CRK10_ARATH,sp|Q8L7G3|CRK7_ARATH,sp|Q9LDT0|CRK30_ARATH,sp|Q8L710|CRK17_ARATH"	"1400.695544,1416.68809,1530.702306,1200.6251685,1175.601998,879.427988,1508.709146,1153.577584,1046.516724,1078.556932,1567.737352,946.544246,965.476386"	"TLLASLSSR,IFGLDQTEENTSR,TIQTATDDFVESNK"	CRK10	http://www.uniprot.org/uniprot/Q8GYA4	19.133034
6.8905e+06	6958678	7.69628e+06	9550773	8.36015e+06	8995966	7654370	6.99054e+06	6665429	7103277	6097999	9349929	sp|Q8LA13|RH11_ARATH	Q8LA13	5	13	10	66024.886	"95.7,99.5,97.7,99.7,99.7,99.1,91.9,99.7,97.0,99.7,99.7,99.6,97.1"	"ELACQIHDEAK | Carbamidomethyl [C4],FLALDEADR,HAIPILLAER,MLDMGFEPQIR,MLDMGFEPQIR | Oxidation [M1 M4],NRPSEPVAAPLPQNDHAGYGGQPAGSR,QSLTLVFVETK,SGIATAFFNENNAQLAR,TGYGYGAGGGGGGGGGWNNR,VEFVQESDK,VGSSTDLITQR,WAPPSSGGGGASGGGYR,YVRPTPVQR"	sp|Q8LA13|RH11_ARATH DEAD-box ATP-dependent RNA helicase 11 OS=Arabidopsis thaliana GN=RH11 PE=1 SV=1	"sp|Q8H136|RH14_ARATH,sp|Q84W89|RH37_ARATH,tr|F4K6V1|F4K6V1_ARATH,sp|Q8LA13|RH11_ARATH,sp|Q9LYJ9|RH46_ARATH"	"1312.607544,1048.518792,1131.67645,1335.631098,1367.620284,2742.320732,1263.708304,1822.897322,1770.745952,1079.51349,1175.615006,1519.680072,1114.624716"	"VGSSTDLITQR,HAIPILLAER,NRPSEPVAAPLPQNDHAGYGGQPAGSR"	RH11	http://www.uniprot.org/uniprot/Q8LA13	26.470588
46861728	51712404	48714024	50269764	39727600	48876648	50418712	44606560	52952704	43536632	49418904	49452132	sp|Q8RWN9|ODP22_ARATH	Q8RWN9	2	13	11	58467.025	"99.6,99.0,99.7,99.0,99.7,99.7,99.7,99.7,99.7,99.7,99.7,99.7,93.4"	"GLSTIGEEVR,IFASPLAR,ISKPSSAPSEDR,ISVNDLVIK,LAEDNNVPLSSIK,QTIPHYYLTVDTCVDK | Carbamidomethyl [C13],SQLNSFQEASGGK,VEKPASAPEAK,VIDGAIGAEWLK,VPALDYVDIPHTQIR,VPQCNSSWTDEYIR | Carbamidomethyl [C4],VVPGTGPDQYNVASYMSVTLSCDHR | Carbamidomethyl [C22],VVPGTGPDQYNVASYMSVTLSCDHR | Carbamidomethyl [C22] Deamidated [N11]"	"sp|Q8RWN9|ODP22_ARATH Dihydrolipoyllysine-residue acetyltransferase component 2 of pyruvate dehydrogenase complex, mitochondrial OS=Arabidopsis thaliana GN=At3g13930 PE=2 SV=2"	"sp|Q5M729|ODP23_ARATH,sp|Q8RWN9|ODP22_ARATH"	"1059.556234,873.507526,1272.629294,999.595642,1398.73386,1951.934277,1351.636476,1125.601122,1270.691372,1735.9258995,1753.77357,2752.255407,2753.257611"	"IFASPLAR,ISVNDLVIK,VPALDYVDIPHTQIR"	At3g13930	http://www.uniprot.org/uniprot/Q8RWN9	29.313544
56933644	52333796	51126232	47728260	42917484	43292304	50123328	41726556	44638168	47484732	42304564	40170548	sp|Q940J8|PAE7_ARATH	Q940J8	2	13	9	42125.019	"99.7,99.7,99.5,99.7,99.7,99.7,99.7,99.4,99.7,99.4,99.7,97.2,99.7"	"ALSPVHSTPSR,AVGNWFYGR,AVVDDLMAK | Oxidation [M7],CVSDAGYFIHGK | Carbamidomethyl [C1],DFGFSGILGGK,GAVCLDGSAPAYHFDK | Carbamidomethyl [C4],GFGSGVNNWIVHMEGGGWCTDVASCNER | Carbamidomethyl [C19 C25] Oxidation [M13],IDCPSPTCNPTCPAISTED | Carbamidomethyl [C3 C8 C12],MKPELCFFPQYVVPSMR | Carbamidomethyl [C6] Oxidation [M1 M16],NVLAPTAVDK,QSTNPDFYNWNR,SLPVSCTSK | Carbamidomethyl [C6],YCDGSSFTGNVEAVNPANK |…	sp|Q940J8|PAE7_ARATH Pectin acetylesterase 7 OS=Arabidopsis thaliana GN=PAE7 PE=2 SV=1	"sp|Q9FH82|PAE11_ARATH,sp|Q940J8|PAE7_ARATH"	"1150.60911,1068.514088,976.489904,1352.620221,1096.556562,1706.772138,3111.30147,2133.86768933,2160.019677,1026.570984,1540.668738,977.484914,2028.884288"	"NVLAPTAVDK,AVGNWFYGR,SLPVSCTSK | Carbamidomethyl [C6]"	PAE7	http://www.uniprot.org/uniprot/Q940J8	46.547315
7262929	6.783e+06	7.39444e+06	9921442	7890335	9488179	7.30333e+06	8353311	6982631	9840822	8467024	9975402	sp|Q94C59|PATL4_ARATH	Q94C59	1	13	13	61188.653	"99.7,99.4,99.7,98.5,99.4,99.2,99.7,99.7,99.7,99.7,99.7,95.6,99.3"	"AETIEVEDEDESVDK,AVLSPFLTQR,EEFVPTEEGAYTVIVQK,EESDFFADLK,ESHPVCYNVHSEELYQTIGSEK | Carbamidomethyl [C6],GAESTDVILLK,IVLTVDNVSGK,LNLKPGGVTSLLQIHDLK,SKLEEAIVDNTLLK,VEEDESKPEGVEK,VIETLQDNYPEFVSR,VNEAFEMLK,YIPADELPVQYGGFK"	sp|Q94C59|PATL4_ARATH Patellin-4 OS=Arabidopsis thaliana GN=PATL4 PE=1 SV=2	sp|Q94C59|PATL4_ARATH	"1706.737531,1130.64572,1937.962472,1199.533782,2605.179834,1144.632584,1143.64988,1945.135304,1571.876123,1473.682269,1808.89489,1079.532528,1695.85189"	"IVLTVDNVSGK,AVLSPFLTQR,YIPADELPVQYGGFK"	PATL4	http://www.uniprot.org/uniprot/Q94C59	33.333333
31043484	30333048	33903936	33894976	27231656	31628924	27500016	25207072	27936248	29341748	30305544	27793708	sp|Q94K73|SYFM_ARATH	Q94K73	1	13	13	49251.129	"99.7,99.7,99.7,99.7,99.7,99.0,99.7,99.7,99.0,99.7,99.7,99.7,99.7"	"CHTSAHQAELLR | Carbamidomethyl [C1],DKHPIGILK,DSTLYAAEDLKK,EDDPTNNVPDSIFSK,FEDLSPIVTTK,FFWSSDER,FLVTGDVYR,GIAGDLVEEVK,LIDQFTNK,NAIYDYFDSNYSNK,QNFDDVLVPADHVSR,SLNDTYYVDSQTVLR,SLTDEEVNDLQSK"	"sp|Q94K73|SYFM_ARATH Phenylalanine--tRNA ligase, chloroplastic/mitochondrial OS=Arabidopsis thaliana GN=At3g58140 PE=1 SV=1"	sp|Q94K73|SYFM_ARATH	"1421.682993,1019.612853,1352.6818655,1676.75479,1248.659972,1072.461356,1068.560272,1128.603056,977.518402,1712.732412,1710.8315145,1772.858368,1476.69449"	"GIAGDLVEEVK,FLVTGDVYR,SLTDEEVNDLQSK"	At3g58140	http://www.uniprot.org/uniprot/Q94K73	35.431235
49163144	48195452	46729044	53574176	47774492	46241724	52764736	40420592	49071692	41108272	51702144	55139540	sp|Q96327|EBP1_ARATH	Q96327	1	13	13	42978.68	"99.7,99.7,99.7,99.7,98.8,99.5,99.5,98.9,99.7,99.7,99.7,99.0,94.6"	"ADVIAAANTAADVALR,ALQVVLAECKPK | Carbamidomethyl [C9],ALQVVLAECKPK | Carbamidomethyl [C9] Deamidated [Q3],ELSLTSPEVVTK,EQTASMYK,FTVLLMPNGSDR,FTVLLMPNGSDR | Oxidation [M6],GWLALGIK,ITSHTLQELPK,IVEGVLSHQLK,NTDVTEAIQK,SAAEIVNK,TIEDPEIK"	sp|Q96327|EBP1_ARATH ERBB-3 BINDING PROTEIN 1 OS=Arabidopsis thaliana GN=EBP1 PE=2 SV=1	sp|Q96327|EBP1_ARATH	"1540.824131,1354.7639315,1355.740371,1301.706536,956.426938,1348.680066,1364.673552,856.517184,1265.697726,1221.70808,1117.561792,830.449308,943.48618"	"ELSLTSPEVVTK,NTDVTEAIQK,ALQVVLAECKPK | Carbamidomethyl [C9]"	EBP1	http://www.uniprot.org/uniprot/Q96327	29.591837
60838108	64703048	60601800	66276864	56418064	66384160	64263016	57738144	61934012	56584440	56219204	61338548	sp|Q96533|ADHX_ARATH	Q96533	2	13	4	40698.313	"99.7,99.7,99.7,99.0,99.7,99.7,99.7,99.7,99.7,99.7,99.7,99.0,99.7"	"AAVAYEPNKPLVIEDVQVAPPQAGEVR,AFDLLHEGTCLR | Carbamidomethyl [C10],FGVNEFVNPK,GTAFGGFK,IDPTAPLDK,IIGIDIDSK,ILYTALCHTDAYTWSGK | Carbamidomethyl [C7],KFGVNEFVNPK,SATGVGIMMNDR,SATGVGIMMNDR | Oxidation [M8 M9],SATGVGIMMNDR | Oxidation [M9],TQVPWLVEK,VDEYITHNLTLGEINK"	sp|Q96533|ADHX_ARATH Alcohol dehydrogenase class-3 OS=Arabidopsis thaliana GN=ADH2 PE=1 SV=2	"sp|Q96533|ADHX_ARATH,tr|F4K7D6|F4K7D6_ARATH"	"2859.514395,1430.697294,1149.581456,783.391472,968.517592,972.54897,1998.949976,1277.676629,1250.57364,1282.56438,1266.572358,1098.60755,1857.947494"	"TQVPWLVEK,GTAFGGFK,AAVAYEPNKPLVIEDVQVAPPQAGEVR"	ADH2	http://www.uniprot.org/uniprot/Q96533	34.300792
22774104	23671232	23870768	23402872	20318948	22765576	22353696	19766028	23145096	20396864	22560288	21281644	sp|Q9C6B3|GCA2_ARATH	Q9C6B3	4	13	10	30064.866	"98.7,98.3,99.7,99.7,99.4,99.7,99.7,99.7,99.0,99.7,99.7,99.0,99.7"	"AIYTVGNWIR,ETPPELILPDNVLPGGKPVAK,GSSIWYGCVLR | Carbamidomethyl [C8],HAMVAAGSLVK,HAMVAAGSLVK | Oxidation [M3],IPSGEVWGGNPAK,KDEDYDSMLGITR,KDEDYDSMLGITR | Oxidation [M8],KLTDEEIVYISQSAK,LTDEEIVYISQSAK,NYINLAQIHASENSK,TLMNVFDK,VGSLLQGSHR"	"sp|Q9C6B3|GCA2_ARATH Gamma carbonic anhydrase 2, mitochondrial OS=Arabidopsis thaliana GN=GAMMACA2 PE=1 SV=1"	"sp|Q9C6B3|GCA2_ARATH,sp|Q9FWR5|GCA1_ARATH,tr|F4HP82|F4HP82_ARATH,sp|Q94AU7|GCA3_ARATH"	"1191.63897,2183.217102,1296.627566,1082.591196,1098.586424,1310.661828,1541.701544,1557.699162,1722.90277,1594.808334,1700.847615,966.484274,1052.5724955"	"AIYTVGNWIR,NYINLAQIHASENSK,VGSLLQGSHR"	GAMMACA2	http://www.uniprot.org/uniprot/Q9C6B3	45.683453
1.25341e+06	812495	649141	1.11494e+06	736949	976374	742001	490667	766422	537871	1.44498e+06	1.18254e+06	sp|Q9C9C5|RL63_ARATH	Q9C9C5	3	13	1	26106.383	"97.0,99.0,99.0,99.7,99.7,94.7,99.7,99.7,99.7,99.7,99.7,99.7,99.7"	"AIEAVPELK,AVDAALIK,FYPAEDVK,KTEGEFFEAEK,KTEGEFFEAEKEEK,QGMKPHELVF,SKVDAPVEKPPK,TEGEFFEAEK,TEGEFFEAEKEEK,VDAPVEKPPK,VDISGVTLDK,VDISGVTLDKFDDK,VNQAYVIGTSTK"	sp|Q9C9C5|RL63_ARATH 60S ribosomal protein L6-3 OS=Arabidopsis thaliana GN=RPL6C PE=2 SV=1	"sp|Q9FZ76|RL61_ARATH,sp|Q9C9C6|RL62_ARATH,sp|Q9C9C5|RL63_ARATH"	"968.554268,799.480638,967.465014,1313.613208,1699.793873,1184.601728,1293.729348,1185.5200465,1571.699253,1078.602259,1045.565736,1550.7840495,1279.677242"	QGMKPHELVF	RPL6C	http://www.uniprot.org/uniprot/Q9C9C5	37.339056
31744524	36692052	28500676	33534136	28985340	33010168	34008920	36602964	33954960	35645504	32554136	29231932	sp|Q9FJ95|DHSO_ARATH	Q9FJ95	1	13	13	39255.246	"99.7,99.7,99.7,99.7,99.7,99.7,99.7,99.7,99.7,99.7,99.7,99.7,99.7"	"AMGSNIDVTFDCAGFNK | Carbamidomethyl [C12],AMGSNIDVTFDCAGFNK | Carbamidomethyl [C12] Oxidation [M2],AVGICGSDVHYLK | Carbamidomethyl [C5],EVDVVGVFR,EVEDAFETSAR,IDVKPLITHR,IVIVDVDENR,LPENVSLEEGAMCEPLSVGVHACR | Carbamidomethyl [C13 C23],LPENVSLEEGAMCEPLSVGVHACR | Carbamidomethyl [C13 C23] Oxidation [M12],TMSTALAATR,VALEPGISCWR | Carbamidomethyl [C9],VCLVGMGHGIMTVPLTPAAAR | Carbamidomethyl [C2] Oxida…	sp|Q9FJ95|DHSO_ARATH Sorbitol dehydrogenase OS=Arabidopsis thaliana GN=SDH PE=1 SV=1	sp|Q9FJ95|DHSO_ARATH	"1845.801938,1861.79324,1417.7011725,1018.545142,1252.558364,1190.714109,1170.625848,2653.234764,2669.225613,1021.522946,1286.643688,2182.105767,2166.109737"	"VALEPGISCWR | Carbamidomethyl [C9],EVEDAFETSAR,EVDVVGVFR"	SDH	http://www.uniprot.org/uniprot/Q9FJ95	37.362637
111709936	121279184	95347520	99149488	102126512	90916624	93841960	101682736	100888472	99319968	107981864	84260080	sp|Q9FMU6|MPCP3_ARATH	Q9FMU6	1	13	13	40089.107	"98.3,99.7,99.0,99.2,99.0,96.0,99.4,99.4,99.5,99.7,99.7,99.7,99.1"	"CNMQIDPAK | Carbamidomethyl [C1],CNMQIDPAK | Carbamidomethyl [C1] Oxidation [M3],FGFYEYFK,GATVGDAVK,GLAPLWGR,GMSDGFPK | Oxidation [M2],IGMVGLFTR,IGMVGLFTR | Oxidation [M3],SEGYGGLYK,SISSGFGILLK,TYSDLAGPEYTAK,VFVGLPTTGGVAPAPAIAATEAK,VQTQPGFAR"	"sp|Q9FMU6|MPCP3_ARATH Mitochondrial phosphate carrier protein 3, mitochondrial OS=Arabidopsis thaliana GN=MPT3 PE=2 SV=1"	sp|Q9FMU6|MPCP3_ARATH	"1075.479098,1091.474538,1099.501514,816.433794,868.491898,853.364484,992.5482,1008.542434,972.455286,1120.649259,1414.661734,2137.1777845,1002.52433"	"SEGYGGLYK,GLAPLWGR,VQTQPGFAR"	MPT3	http://www.uniprot.org/uniprot/Q9FMU6	30.933333
28758124	33765976	32733812	31439424	29529380	31930272	31822592	30883356	29462132	27107800	28708304	28634804	sp|Q9FNN5|NDUV1_ARATH	Q9FNN5	1	13	13	53448.889	"99.7,99.7,99.3,99.1,99.2,99.7,99.0,99.7,99.7,98.2,98.7,98.1,99.7"	"ASAAYIYIR,AVQSGLGTAAVIVMDK,EAYAAGLLGK,GGAGFPSGLK,GPEWFSSFGR,HESCGQCTPCR | Carbamidomethyl [C4 C7 C10],HFRPELER,LEEIDMLQEVTK,LEEIDMLQEVTK | Oxidation [M6],RGPEWFSSFGR,STDVVDAIAR,THFGGLKDEDR,VSDGRPSYLVVNADESEPGTCK | Carbamidomethyl [C21]"	"sp|Q9FNN5|NDUV1_ARATH NADH dehydrogenase [ubiquinone] flavoprotein 1, mitochondrial OS=Arabidopsis thaliana GN=At5g08530 PE=2 SV=1"	sp|Q9FNN5|NDUV1_ARATH	"1026.550104,1558.8389965,991.533834,889.465874,1168.52958,1390.513533,1082.561589,1446.727602,1462.72206,1324.631244,1045.539056,1273.604699,2379.1001985"	"EAYAAGLLGK,STDVVDAIAR,HFRPELER"	At5g08530	http://www.uniprot.org/uniprot/Q9FNN5	26.748971
59375608	70321080	63125012	76863536	63443332	66678304	70327448	56915416	71061160	55082220	65185924	72224520	sp|Q9FVT2|EF1G2_ARATH	Q9FVT2	2	13	7	46399.797	"99.6,99.7,99.7,99.7,99.7,99.7,99.7,99.7,99.7,99.7,99.7,99.7,99.7"	"AAPVAEAPKPAEEEEAPKPK,ALIAAEYAGVK,FTSAFPHVER,IEESADFQMGVTNK | Oxidation [M9],MLICGSEGPFK | Carbamidomethyl [C4],MLICGSEGPFK | Carbamidomethyl [C4] Oxidation [M1],QTEAVPPVPTK,VDISDEAQK,VPVLETPEGPIFESNAIAR,VSQMIEDAEPFEGEALLDAK | Oxidation [M4],YFWTMVNQPEFK | Oxidation [M5],YNDENMVSFVTLNK,YNDENMVSFVTLNK | Oxidation [M6]"	sp|Q9FVT2|EF1G2_ARATH Probable elongation factor 1-gamma 2 OS=Arabidopsis thaliana GN=At1g57720 PE=2 SV=1	"sp|Q9FVT2|EF1G2_ARATH,sp|O04487|EF1G1_ARATH"	"2058.063468,1104.618028,1189.5897305,1583.713286,1237.5841425,1253.578386,1165.63289,1003.481944,2038.075608,2207.03209867,1604.731713,1672.775632,1688.7707735"	"ALIAAEYAGVK,FTSAFPHVER,AAPVAEAPKPAEEEEAPKPK"	At1g57720	http://www.uniprot.org/uniprot/Q9FVT2	36.561743
8827964	8467527	11186345	10281614	8886375	10263475	9549997	6.25068e+06	10047149	5.73851e+06	9564248	10324909	sp|Q9LF33|UGDH3_ARATH	Q9LF33	3	13	4	53116.502	"99.7,99.7,99.1,98.2,99.7,99.7,99.7,99.7,99.7,99.7,99.7,99.7,98.1"	"AADLTYWESAAR,DIYAQWVPEER,ETPAIDVCK | Carbamidomethyl [C8],FDWDHPLHLQPMSPTTVK,FLNSSVGFGGSCFQK | Carbamidomethyl [C12],ICCIGAGYVGGPTMAVIALK | Carbamidomethyl [C2 C3] Oxidation [M14],IFENMQKPAFVFDGR,ILTTNLWSAELSK,IVSSMFNTVSNK,IVSSMFNTVSNK | Oxidation [M5],LAANAFLAQR,LSIYDPQVTEEQIQR,MIADVSVSDK | Oxidation [M1]"	sp|Q9LF33|UGDH3_ARATH UDP-glucose 6-dehydrogenase 3 OS=Arabidopsis thaliana GN=UGD3 PE=1 SV=1	"sp|Q9LIA8|UGDH2_ARATH,sp|Q9LF33|UGDH3_ARATH,sp|Q9FM01|UGDH4_ARATH"	"1352.635282,1404.666556,1031.496014,2148.04688,1633.7559705,2066.035601,1797.887469,1474.802672,1325.6644,1341.658748,1073.598058,1817.917462,1079.518448"	"ILTTNLWSAELSK,LSIYDPQVTEEQIQR,DIYAQWVPEER"	UGD3	http://www.uniprot.org/uniprot/Q9LF33	33.333333
8030282	10078267	7.96023e+06	7664035	7.92239e+06	8138201	8635877	7.98874e+06	8774047	7.89925e+06	9186986	7.79435e+06	sp|Q9LI74|CHUP1_ARATH	Q9LI74	2	13	7	111910.322	"97.3,99.6,98.5,99.7,99.4,99.7,98.8,99.5,99.6,99.7,99.0,99.6,99.7"	"ASENAATVTK,EAAFEYQDLMK,EFLLLQGVR,EQESDIVELQR,IATLSNMTESDK | Oxidation [M7],LINSVINQTR,LMLEYAGSER,LQEELSQNGIVR,QIQLDANQTK,QVTSFVDDPNLSCEPALK | Carbamidomethyl [C13],STFLLAVK,VAYELDSVSGSDKDPNR,VEQSVYALLR"	"sp|Q9LI74|CHUP1_ARATH Protein CHUP1, chloroplastic OS=Arabidopsis thaliana GN=CHUP1 PE=1 SV=1"	"tr|F4JA42|F4JA42_ARATH,sp|Q9LI74|CHUP1_ARATH"	"990.496822,1343.606728,1073.623088,1344.65059,1324.619124,1156.655968,1167.560402,1384.72758,1157.60337,2018.964568,877.527226,1850.8625185,1176.651442"	"LINSVINQTR,LMLEYAGSER,EQESDIVELQR"	CHUP1	http://www.uniprot.org/uniprot/Q9LI74	14.741036
12251779	11511965	13112731	13401549	14290063	13743823	11482593	10757303	11740195	13238154	11087188	13204985	sp|Q9LI77|GATA_ARATH	Q9LI77	1	13	13	57180.759	"99.7,99.0,99.7,99.1,99.7,98.5,99.7,99.7,99.7,99.7,99.7,99.7,96.3"	"AALEQNDILISPAAPSAAYK,DAQEIDQR,DNICTQGMPSTAASR | Carbamidomethyl [C4],ELGGIVVGK,ETLEDGVDSGVR,QCMVSLGSDTGGSVR | Carbamidomethyl [C2],QPASFCGVVGLKPTYGR | Carbamidomethyl [C6],SLLSGETTAVEIAK,TIDTSVISPPQSQILTTR,VGHIFEQTLK,VPGGSSGGSAAAVAAR,YGNQVMAEELNK,YGNQVMAEELNK | Oxidation [M6]"	"sp|Q9LI77|GATA_ARATH Glutamyl-tRNA(Gln) amidotransferase subunit A, chloroplastic/mitochondrial OS=Arabidopsis thaliana GN=GATA PE=2 SV=1"	sp|Q9LI77|GATA_ARATH	"2042.068913,973.445966,1607.702414,870.518496,1275.592018,1552.69604,1835.935155,1417.762986,1956.052797,1170.639237,1313.668196,1394.648752,1410.644468"	"SLLSGETTAVEIAK,ETLEDGVDSGVR,VPGGSSGGSAAAVAAR"	GATA	http://www.uniprot.org/uniprot/Q9LI77	30.912477
271201792	207916576	216045040	227009600	191486704	231509184	231735888	223294224	230188992	231017008	221753952	219065664	sp|Q9LYA9|CP41A_ARATH	Q9LYA9	1	13	13	43929.274	"99.7,99.7,98.8,99.7,99.7,99.7,99.7,99.7,99.7,99.7,99.0,99.7,99.7"	"AVPIPGSGLQLTNISHVR,AVTLDGMAK,DCEEWFFDR | Carbamidomethyl [C2],DLDTVRPVVDWAK,ELLSAGHAVTILTVGDESSEK,FSEIVSGGGK,NMHFYAEPR,NMHFYAEPR | Deamidated [N1],NMHFYAEPR | Oxidation [M2],STEQPPHVEGDAVK,TNLPEDLK,TNLPEDLKER,TVEIVHYDPK"	"sp|Q9LYA9|CP41A_ARATH Chloroplast stem-loop binding protein of 41 kDa a, chloroplastic OS=Arabidopsis thaliana GN=CSP41A PE=1 SV=1"	sp|Q9LYA9|CP41A_ARATH	"1858.0433655,904.468652,1302.498454,1512.7928325,2155.098171,979.497606,1163.518287,1164.501987,1179.51321,1492.7151815,928.486746,1213.631055,1199.618884"	"FSEIVSGGGK,AVPIPGSGLQLTNISHVR,TNLPEDLK"	CSP41A	http://www.uniprot.org/uniprot/Q9LYA9	30.295567
11960022	11973805	10703631	10866009	9545631	10359733	10929542	10261255	12846467	8690859	11463915	9698884	sp|Q9M084|SYDC2_ARATH	Q9M084	2	13	10	62916.954	"99.0,99.6,99.7,95.6,99.7,99.7,99.7,99.4,99.7,99.1,99.7,99.7,99.7"	"AEDSFTHR,AGECGIDVK | Carbamidomethyl [C4],EAGVEVDPLGDLNTESER,GEEIISGAQR,KLGQLVLEK,LTFEEGVQMLK,NFVGIHTPK,QMAICGDLR | Carbamidomethyl [C5],SEADIEASLQTPSPAAR,VFEVGPVFR,VHIPEVLEQR,YGAPLHGGFGVGLER,YNTEFYILHR"	"sp|Q9M084|SYDC2_ARATH Aspartate--tRNA ligase 2, cytoplasmic OS=Arabidopsis thaliana GN=IBI1 PE=1 SV=1"	"sp|Q8H104|SYDC1_ARATH,sp|Q9M084|SYDC2_ARATH"	"961.424301,947.437888,1928.901692,1058.535836,1026.643797,1293.662796,1011.550251,1062.494884,1741.848282,1048.570862,1218.671994,1528.777818,1354.666722"	"LTFEEGVQMLK,YGAPLHGGFGVGLER,GEEIISGAQR"	IBI1	http://www.uniprot.org/uniprot/Q9M084	25.806452
7.95905e+06	8559508	9080343	9007191	7.65289e+06	8749309	8952407	8649723	9238535	8303608	8426490	8561802	sp|Q9M0Y8|NSF_ARATH	Q9M0Y8	1	13	13	81486.248	"99.7,98.7,99.7,99.7,98.5,99.7,99.7,94.3,99.7,99.7,99.6,99.7,99.7"	"ADVEGQDHTNGIER,AMLLVEQVK,DGTGVHDSIVNQLLTK,DLLDEALLRPGR,EAASSNIFK,IVNGPEVLSK,LQILQIHTNK,QLSMDDLTKPVEEENIK,SEQVDAALLSTQLK,SPLVTCLLEGPSGSGK | Carbamidomethyl [C6],SPMSIIILDDIER | Oxidation [M3],VSTGDMVSVSR,YTNQVLTVGQK"	sp|Q9M0Y8|NSF_ARATH Vesicle-fusing ATPase OS=Arabidopsis thaliana GN=NSF PE=2 SV=2	sp|Q9M0Y8|NSF_ARATH	"1539.692088,1029.588958,1695.879198,1366.756908,965.48021,1054.601874,1206.70854,1987.976409,1501.798116,1600.810298,1516.780572,1136.549978,1249.666624"	"EAASSNIFK,SPLVTCLLEGPSGSGK | Carbamidomethyl [C6],LQILQIHTNK"	NSF	http://www.uniprot.org/uniprot/Q9M0Y8	21.832884
33257028	38732516	38929104	39509740	38729676	42543472	40630152	26981340	40537544	31107680	46020048	44054100	sp|Q9SA73|OLA1_ARATH	Q9SA73	1	13	13	44470.524	"99.7,99.7,96.8,99.7,98.4,99.7,99.7,99.4,99.0,99.7,99.0,99.5,92.3"	"APQAAGAIHTDFER,AVDGIFHVLR,DAGPVERPILGR,DLETITEELR,ELGNEPAVK,FDWLCQTYKPK | Carbamidomethyl [C5],GAHEGQGLGNNFLSHIR,GFICAEVMK | Carbamidomethyl [C4],IELELLQK,IGIVGLPNVGK,SLADMAPDEAAK,SLADMAPDEAAK | Oxidation [M5],STLFNTLTK"	sp|Q9SA73|OLA1_ARATH Obg-like ATPase 1 OS=Arabidopsis thaliana GN=YchF1 PE=1 SV=1	sp|Q9SA73|OLA1_ARATH	"1482.720612,1125.629559,1278.704145,1217.614212,955.497346,1484.7110075,1805.892544,1053.498736,984.585572,1065.65499,1217.559558,1233.55351,1023.560296"	"IELELLQK,IGIVGLPNVGK,DLETITEELR"	YchF1	http://www.uniprot.org/uniprot/Q9SA73	33.502538
6.71683e+06	7.30418e+06	5107658	5.81582e+06	5700524	5213855	6.16074e+06	4.33225e+06	7.18591e+06	3.84862e+06	8487687	6.14664e+06	sp|Q9SAD7|IF4B2_ARATH	Q9SAD7	1	13	13	59323.743	"99.7,99.3,98.8,98.9,99.7,99.0,99.7,99.7,98.2,99.7,93.3,99.7,99.2"	"ADTEVSETPTAVK,EAAIAPESK,EQMLQLPTGPR,ESQQESDSNHQNLPDLIR,KADTEVSETPTAVK,MTLSEFTK,RVDRPETEGER,SEDEMQPGR,SLPSFDQGR,SVESMERPR,SYGGFDDDQR,VDRPETEGER,VSDFPQVSR"	sp|Q9SAD7|IF4B2_ARATH Eukaryotic translation initiation factor 4B2 OS=Arabidopsis thaliana GN=EIF4B2 PE=1 SV=1	sp|Q9SAD7|IF4B2_ARATH	"1346.655962,914.470618,1268.65425,2108.976762,1474.75171,955.468506,1342.655127,1047.428676,1005.48757,1089.522915,1158.457568,1186.555806,1033.518296"	"MTLSEFTK,VSDFPQVSR,SLPSFDQGR"	EIF4B2	http://www.uniprot.org/uniprot/Q9SAD7	21.311475
22725084	28051484	24614160	25438760	18796500	22971732	29146508	18943768	27637220	17904140	24557236	22902712	sp|Q9SIU8|P2C20_ARATH	Q9SIU8	3	13	10	31846.756	"99.7,99.7,99.7,99.7,99.7,99.7,99.7,99.3,99.7,99.7,99.3,99.7,99.7"	"AGHPMEDYVVSEFK,AGHPMEDYVVSEFK | Oxidation [M5],ELIEEAVSK,GGFVSNIPGDVPR,GGSTAVTGILIDGK,IHLSSDPDIR,NGVASQLSVDHEPSK,NGVASQLSVDHEPSK | Deamidated [N1],NIAHGYDFVK,SIKDPQAAAK,TLVIANVGDSR,VDGQLAVAR,VMSNQEAVDLIK"	sp|Q9SIU8|P2C20_ARATH Probable protein phosphatase 2C 20 OS=Arabidopsis thaliana GN=PPC3-1.2 PE=1 SV=3	"sp|Q9LDA7|P2C39_ARATH,sp|Q9SIU8|P2C20_ARATH,sp|Q93YW5|P2C58_ARATH"	"1607.7271485,1623.723438,1016.539084,1313.671462,1287.703046,1151.593461,1566.765435,1567.7474,1162.576698,1027.564638,1143.623094,927.513766,1345.687761"	"ELIEEAVSK,TLVIANVGDSR,VMSNQEAVDLIK"	PPC3	http://www.uniprot.org/uniprot/Q9SIU8	43.793103
16026339	15886226	16368737	15981239	12718699	13234202	15234792	10193528	14875628	8905984	13038884	13780978	sp|Q9SQT8|DHQSD_ARATH	Q9SQT8	1	13	13	65795.325	"96.4,99.7,99.7,99.7,99.7,99.7,99.3,96.3,99.7,99.7,99.4,99.7,98.6"	"AHELGADLVEIR,ALELAEAIGGK,EAALQCCDEVDPLAK | Carbamidomethyl [C6 C7],IATTAVDIADVAR,IQQTGADIVK,NPSLICAPVMADSIDK | Carbamidomethyl [C6],NPSLICAPVMADSIDK | Carbamidomethyl [C6] Oxidation [M10],SIGAVNTILR,SPLPTLFTYRPK,SSGDPSSVPSSSSPLASK,TVVVIGAGGAGK,VIVSSHNYQNTPSVEDLDGLVAR,VSAPGQPTIK"	"sp|Q9SQT8|DHQSD_ARATH Bifunctional 3-dehydroquinate dehydratase/shikimate dehydrogenase, chloroplastic OS=Arabidopsis thaliana GN=EMB3004 PE=1 SV=1"	sp|Q9SQT8|DHQSD_ARATH	"1321.69718,1070.596014,1717.764645,1314.713548,1071.591964,1729.838474,1745.831804,1042.614276,1418.791938,1675.791716,1027.602794,2512.253259,996.559978"	"IATTAVDIADVAR,SIGAVNTILR,VSAPGQPTIK"	EMB3004	http://www.uniprot.org/uniprot/Q9SQT8	26.865672
[truncated: 4,257 more rows]

## Sheet: all proteins_min2peptides
Supplementary Table 2. Proteomics differential expression analysis:log-transformed and normalized intensities, analysis results for proteins identified by a minimum of 2 peptides.
[truncated: 3,398 more rows]

[truncated: 5 more sheets: only 708DEPs, cluster2_Chl located proteins, cluster2_up 20c chl located, cluster2_up 30c chl located, cluster2_up 20&30c chl located]
